# Supplementary material for: One-pot transfer hydrogenation and reductive amination of polyenals
Source: Royal Society of Chemistry journal article supplement (doi:10.1039/d4cc04071f), 2024-01-01

## Supporting Information

# One-pot Transfer Hydrogenation and Reductive Amination of Polyenals

Juntao Yang, Miaomiao Tian, Junbiao Chang\* and Bingxian Liu\*

*State Key Laboratory of Antiviral Drugs, Pingyuan Laboratory, School of Chemistry  
and Chemical Engineering, Henan Normal University, Xixiang, Henan 453007,  
China*

*Email: liubingxian@htu.edu.cn*

### Table of Contents

|                                                    |     |
|----------------------------------------------------|-----|
| 1. General Information.....                        | S2  |
| 2. General Procedure: Synthesis of Substrates..... | S2  |
| 3. Experimental Section.....                       | S10 |
| 4. Mechanistic Studies.....                        | S17 |
| 5. References.....                                 | S26 |
| 6. Characterization Data.....                      | S28 |
| 7. NMR Spectrum and HRMS Data.....                 | S44 |

## 1. General Information

All chemicals were obtained from commercial sources and were used as received unless otherwise noted. All the reactions were carried out under nitrogen atmosphere using standard Schlenk technique. The  $^1\text{H}$  NMR spectra were recorded on a 400 MHz or 600 MHz NMR spectrometer. The  $^{13}\text{C}$  NMR spectra were recorded at 100 MHz or 150 MHz. The  $^{19}\text{F}$  NMR spectra were recorded at 376 or 565 MHz. Chemical shifts were expressed in parts per million ( $\delta$ ) downfield from the internal standard tetramethylsilane, and were reported as s (singlet), d (doublet), t (triplet), dd (doublet of doublet), dt (doublet of triplet), m (multiplet), brs (broad singlet), etc. The residual solvent signals were used as references and the chemical shifts were converted to the TMS scale ( $\text{CDCl}_3$ :  $\delta \text{H} = 7.26 \text{ ppm}$ ,  $\delta \text{C} = 77.16 \text{ ppm}$ ). The coupling constants  $J$  were given in Hz. High resolution mass spectra were obtained on an Agilent Q-TOF 6540 spectrometer and model Orbitrap Explorier MX. Column chromatography was performed on silica gel (200-300 mesh). Reactions were heated by metal sand bath (WATTCAS, LAB-500).

Unless otherwise noted, all other compounds have been reported in the literature or are commercially available.

## 2. General Procedure: Synthesis of Substrates

The substrates (**1f-1q**)<sup>1</sup>, (**1d**, **1e**, **1s-1u**)<sup>2</sup> and (**1aa-1af**)<sup>3</sup> were prepared according to the literature.

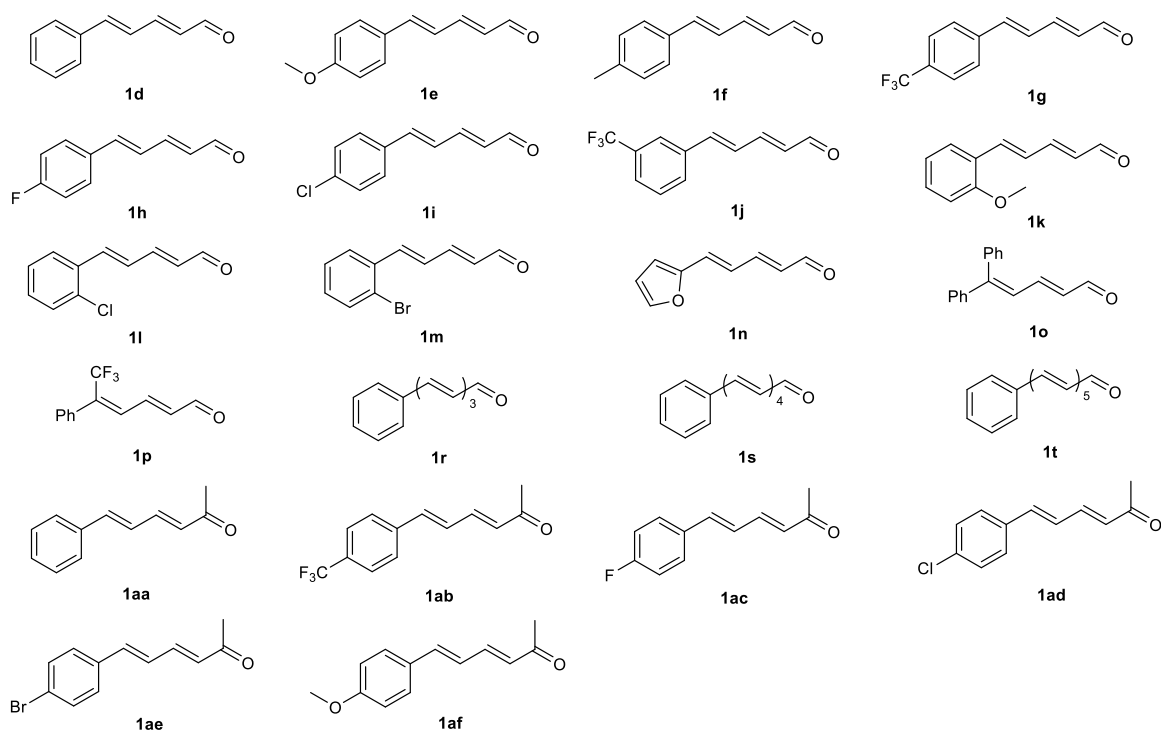

### General Procedure A<sup>1</sup>

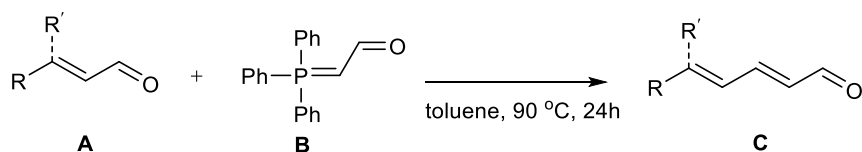

Unless otherwise mentioned in the following specific substrates, the general procedure is: to a 100 mL dried Schlenk flask with a stir bar was added  $\alpha,\beta$  unsaturated aldehydes **A** (1.0 equivalent, 3 mmol), (triphenylphosphoranylidene) acetaldehyde **B** (1.2 equivalents, 3.6 mmol) and dry toluene (20 mL) under  $N_2$  atmosphere. The reaction mixture was stirred at 90°C for 24 hours. Upon completion, cool down the reaction mixture down to room temperature. After which the reaction mixture was filtered through a plug of silica eluting, and then the filtrate was concentrated under reduced pressure and the resulting crude material was purified by flash column chromatography to afford the product **C**.

### General Procedure B<sup>2</sup>

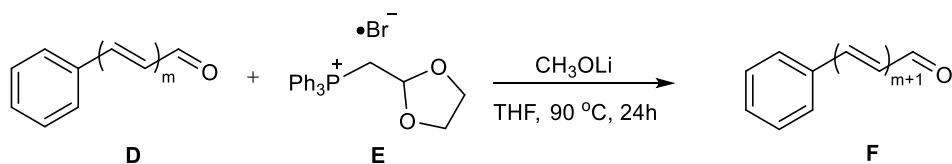

Unless otherwise mentioned in the following specific substrates, the general



2H), 7.43 – 7.33 (m, 3H), 7.32 – 7.24 (m, 1H), 7.08 – 6.97 (m, 2H), 6.34 – 6.23 (m, 1H). The analytical data are consistent with those reported in the literature.<sup>2</sup>

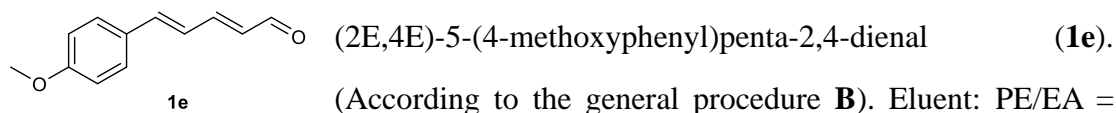

20:1, light yellow solid (504 mg, 89%, m.p. 73 – 74 °C). <sup>1</sup>H NMR (400 MHz, CDCl<sub>3</sub>) δ 9.59 (d, *J* = 8.0 Hz, 1H), 7.48 – 7.42 (m, 2H), 7.29 – 7.20 (m, 1H), 6.97 (d, *J* = 15.5 Hz, 1H), 6.93 – 6.83 (m, 3H), 6.28 – 6.17 (m, 1H), 3.84 (s, 3H). The analytical data are consistent with those reported in the literature.<sup>4</sup>

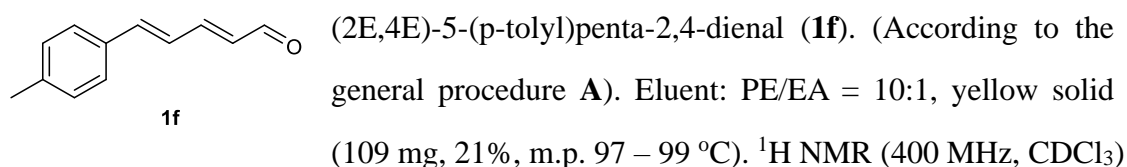

δ 9.64 (d, *J* = 8.0 Hz, 1H), 7.43 (d, *J* = 8.2 Hz, 2H), 7.34 – 7.28 (m, 1H), 7.22 (d, *J* = 7.9 Hz, 2H), 7.07 – 6.97 (m, 2H), 6.28 (dd, *J* = 15.2, 8.0 Hz, 1H), 2.40 (s, 3H). The analytical data are consistent with those reported in the literature.<sup>4</sup>

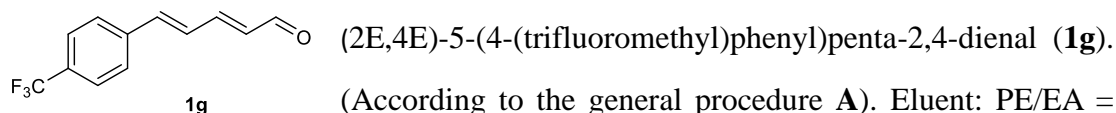

15:1, yellow semi-solid (260 mg, 38%). <sup>1</sup>H NMR (400 MHz, CDCl<sub>3</sub>) δ 9.64 (d, *J* = 7.9 Hz, 1H), 7.66 – 7.56 (m, 4H), 7.32 – 7.23 (m, 1H), 7.12 – 6.98 (m, 2H), 6.32 (dd, *J* = 15.2, 7.9 Hz, 1H). The analytical data are consistent with those reported in the literature.<sup>4</sup>

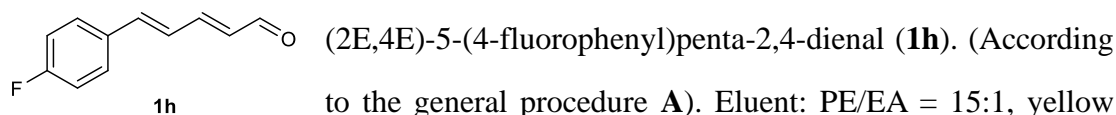

Hz, 1H), 7.55 – 7.45 (m, 2H), 7.32 – 7.21 (m, 1H), 7.09 (t, *J* = 8.5 Hz, 2H), 7.03 – 6.88 (m, 2H), 6.28 (dd, *J* = 15.2, 8.0 Hz, 1H). The analytical data are consistent with those reported in the literature.<sup>4</sup>

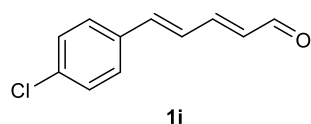

(2E,4E)-5-(4-chlorophenyl)penta-2,4-dienal (**1i**).

(According to the general procedure **A**). Eluent: PE/EA = 10:1, yellow solid (213 mg, 37%, m.p. 136 – 138 °C). <sup>1</sup>H

NMR (400 MHz, CDCl<sub>3</sub>) δ 9.60 (d, *J* = 7.9 Hz, 1H), 7.44 – 7.37 (m, 2H), 7.36 – 7.30 (m, 2H), 7.25 – 7.19 (m, 1H), 6.97 – 6.92 (m, 2H), 6.26 (dd, *J* = 15.2, 7.9 Hz, 1H).

The analytical data are consistent with those reported in the literature.<sup>4</sup>

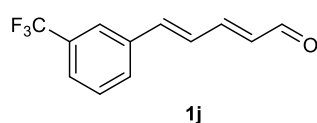

(2E,4E)-5-(3-(trifluoromethyl)phenyl)penta-2,4-dienal(**1j**).

(According to the general procedure **A**). Eluent: PE/EA = 15:1, yellow oil (224 mg, 33%). <sup>1</sup>H NMR (400 MHz,

CDCl<sub>3</sub>) δ 9.65 (d, *J* = 8.0 Hz, 1H), 7.74 (s, 1H), 7.68 (d, *J* = 7.7 Hz, 1H), 7.60 (d, *J* = 7.8 Hz, 1H), 7.52 (t, *J* = 7.8 Hz, 1H), 7.28 (ddd, *J* = 15.2, 8.8, 1.4 Hz, 1H), 7.12 – 6.99 (m, 2H), 6.33 (dd, *J* = 15.2, 7.9 Hz, 1H). <sup>13</sup>C NMR (100 MHz, CDCl<sub>3</sub>) δ 193.6, 151.1, 140.4, 136.4, 132.8, 131.6 (q, *J* = 32.2 Hz, 1C), 130.6, 129.6, 128.0, 126.1 (q, *J* = 3.7 Hz, 1C), 124.2 (q, *J* = 3.8 Hz, 1C), 123.9 (q, *J* = 270.8 Hz, 1C). <sup>19</sup>F NMR (376 MHz, CDCl<sub>3</sub>) δ -62.87. HRMS (ESI-TOF) *m/z*: [M + H]<sup>+</sup> Calcd for C<sub>12</sub>H<sub>10</sub>F<sub>3</sub>O<sup>+</sup> 227.0678, Found: 227.0678.

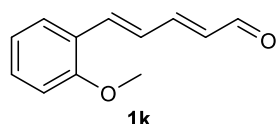

(2E,4E)-5-(2-methoxyphenyl)penta-2,4-dienal (**1k**).

(According to the general procedure **B**). Eluent: PE/EA = 15:1, yellow viscous oil (469 mg, 83%). <sup>1</sup>H NMR (400 MHz, CDCl<sub>3</sub>)

δ 9.58 (d, *J* = 8.0 Hz, 1H), 7.52 (dd, *J* = 7.7, 1.8 Hz, 1H), 7.40 – 7.22 (m, 3H), 7.08 – 7.00 (m, 1H), 6.99 – 6.93 (m, 1H), 6.92 – 6.88 (m, 1H), 6.23 (dd, *J* = 15.1, 8.0 Hz, 1H), 3.88 (s, 3H). The analytical data are consistent with those reported in the literature.<sup>5</sup>

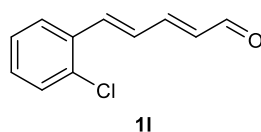

(2E,4E)-5-(2-chlorophenyl)penta-2,4-dienal (**1l**). (According to the general procedure **A**). Eluent: PE/EA = 10:1, white solid

(202 mg, 35%, m.p. 86 – 88 °C). <sup>1</sup>H NMR (400 MHz, CDCl<sub>3</sub>) δ 9.55 (d, *J* = 7.9 Hz, 1H), 7.59 – 7.54 (m, 1H), 7.38 – 7.28 (m, 2H), 7.24 – 7.15 (m,

3H), 6.94 – 6.85 (m, 1H), 6.20 (dd,  $J = 15.3, 8.0$  Hz, 1H).  $^{13}\text{C}$  NMR (100 MHz,  $\text{CDCl}_3$ )  $\delta$  193.65, 151.7, 137.9, 134.5, 133.7, 132.6, 130.6, 130.3, 128.5, 127.25, 127.1. HRMS (ESI-TOF)  $m/z$ :  $[\text{M} + \text{H}]^+$  Calcd for  $\text{C}_{11}\text{H}_{10}\text{ClO}^+$  193.0415, Found: 193.0414.

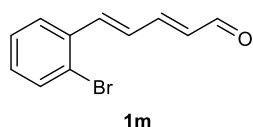

(2E,4E)-5-(2-bromophenyl)penta-2,4-dienal (**1m**). (According to the general procedure A). Eluent: PE/EA = 10:1, white solid (140 mg, 20%, m.p. 82 – 83.5 °C).  $^1\text{H}$  NMR (400 MHz,  $\text{CDCl}_3$ )  $\delta$  9.65 (d,  $J = 7.9$  Hz, 1H), 7.68 – 7.58 (M, 2H), 7.41 (d,  $J = 15.5$  Hz, 1H), 7.38 – 7.28 (m, 2H), 7.23 – 7.16 (m, 1H), 7.01 – 6.91 (M, 1H), 6.35 – 6.25 (M, 1H).  $^{13}\text{C}$  NMR (100 MHz,  $\text{CDCl}_3$ )  $\delta$  193.65, 151.6, 140.5, 135.4, 133.6, 132.6, 130.8, 128.7, 127.9, 127.3, 125.1. HRMS (ESI-TOF)  $m/z$ :  $[\text{M} + \text{H}]^+$  Calcd for  $\text{C}_{11}\text{H}_{10}\text{BrO}^+$  236.9910, Found: 236.9908.

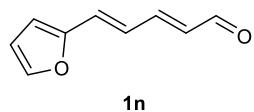

(2E,4E)-5-(furan-2-yl)penta-2,4-dienal (**1n**). (According to the general procedure A). Eluent: PE/EA = 20:1, brown solid (202 mg, 45%, m.p. 86 – 89 °C).  $^1\text{H}$  NMR (400 MHz,  $\text{CDCl}_3$ )  $\delta$  9.58 (d,  $J = 8.0$  Hz, 1H), 7.47 (d,  $J = 1.8$  Hz, 1H), 7.18 (dd,  $J = 15.1, 11.0$  Hz, 1H), 6.88 (dd,  $J = 15.3, 11.0$  Hz, 1H), 6.76 (d,  $J = 15.4$  Hz, 1H), 6.53 (d,  $J = 3.4$  Hz, 1H), 6.46 (dd,  $J = 3.4, 1.8$  Hz, 1H), 6.24 (dd,  $J = 15.1, 8.0$  Hz, 1H). The analytical data are consistent with those reported in the literature.<sup>6</sup>

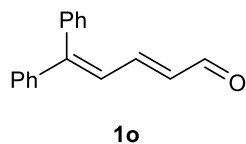

(E)-5,5-diphenylpenta-2,4-dienal (**1o**). (According to the general procedure A). Eluent: PE/EA = 20:1, brown viscous oil (170 mg, 24%).  $^1\text{H}$  NMR (400 MHz,  $\text{CDCl}_3$ )  $\delta$  9.55 (d,  $J = 8.0$  Hz, 1H), 7.57 – 7.52 (m, 3H), 7.46 – 7.40 (m, 5H), 7.36 – 7.28 (m, 3H), 7.03 (d,  $J = 11.4$  Hz, 1H), 6.45 – 6.36 (m, 1H). The analytical data are consistent with those reported in the literature.<sup>7</sup>

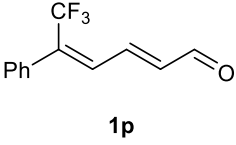
**(2E,4Z)-6,6,6-trifluoro-5-phenylhexa-2,4-dienal (1p).**  
 (According to the general procedure **A**). Eluent: PE/EA = 100:3, yellow oil (435 mg, 64%). <sup>1</sup>H NMR (400 MHz, CDCl<sub>3</sub>) δ 9.50 (d, *J* = 7.7 Hz, 1H), 7.51 – 7.43 (m, 3H), 7.35 – 7.29 (m, 2H), 7.09 – 6.95 (m, 2H), 6.45 – 6.36 (m, 1H). <sup>13</sup>C NMR (100 MHz, CDCl<sub>3</sub>) δ 193.0, 144.6, 139.0 (q, *J* = 30.3 Hz, 1C), 137.0, 130.8, 130.3 (q, *J* = 5.9 Hz, 1C), 129.8, 129.75, 128.9, 123.0 (q, *J* = 272.0 Hz, 1C). <sup>19</sup>F NMR (376 MHz, CDCl<sub>3</sub>) δ -65.88. HRMS (ESI-TOF) *m/z*: [M + H]<sup>+</sup> Calcd for C<sub>12</sub>H<sub>10</sub>F<sub>3</sub>O<sup>+</sup> 227.0678, Found: 227.0678.

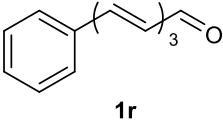
**(2E,4E,6E)-7-phenylhepta-2,4,6-trienal (1r).** (According to the general procedure **B**). Eluent: PE/EA = 15:1, dark yellow solid (471 mg, 85%, m.p. 108 – 111 °C). <sup>1</sup>H NMR (400 MHz, CDCl<sub>3</sub>) δ 9.59 (d, *J* = 8.0 Hz, 1H), 7.49 – 7.42 (m, 2H), 7.39 – 7.27 (m, 3H), 7.18 (dd, *J* = 15.2, 11.2 Hz, 1H), 6.95 – 6.77 (m, 3H), 6.61 – 6.51 (m, 1H), 6.19 (dd, *J* = 15.2, 7.9 Hz, 1H). The analytical data are consistent with those reported in the literature.<sup>2</sup>

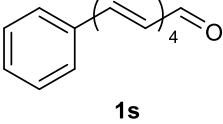
**(2E,4E,6E,8E)-9-phenylnona-2,4,6,8-tetraenal (1s).** (According to the general procedure **B**). Eluent: PE/EA = 10:1, yellow solid (570 mg, 90%, m.p. 125 – 128 °C). <sup>1</sup>H NMR (400 MHz, CDCl<sub>3</sub>) δ 9.57 (d, *J* = 7.9 Hz, 1H), 7.47 – 7.40 (m, 2H), 7.37 – 7.31 (m, 2H), 7.29 – 7.24 (m, 1H), 7.15 (dd, *J* = 15.1, 11.3 Hz, 1H), 6.89 (dd, *J* = 15.4, 10.8 Hz, 1H), 6.80 – 6.60 (m, 3H), 6.47 (dt, *J* = 14.7, 11.5 Hz, 2H), 6.17 (dd, *J* = 15.1, 7.9 Hz, 1H). The analytical data are consistent with those reported in the literature.<sup>2</sup>

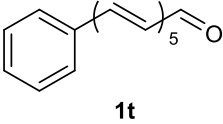
**(2E,4E,6E,8E,10E)-11-phenylundeca-2,4,6,8,10-pentaenal (1t).**  
 (According to the general procedure **B**). Eluent: PE/EA = 10:1, yellow solid (355 mg, 50%, m.p. 157 – 160 °C). <sup>1</sup>H NMR (400 MHz, CDCl<sub>3</sub>) δ 9.57 (d, *J* = 8.0 Hz, 1H), 7.45 – 7.39 (m, 2H), 7.36 – 7.29 (m, 2H), 7.27 – 7.22 (m, 1H), 7.15 (dd, *J* = 15.1, 11.3 Hz, 1H), 6.88 (dd, *J* = 15.5, 10.8 Hz, 1H), 6.74 (dd, *J* = 14.7, 11.1 Hz, 1H), 6.65 (d, *J* = 15.5 Hz, 1H), 6.62 – 6.35 (m, 5H), 6.16



(dd,  $J = 15.1, 8.0$  Hz, 1H). The analytical data are consistent with those reported in the literature.<sup>2</sup>

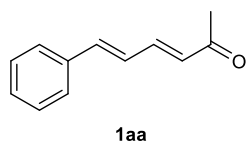

(3E,5E)-6-phenylhexa-3,5-dien-2-one (**1aa**). (According to the general procedure C). Yellow solid (248 mg, 72%, m.p. 62 – 64 °C). <sup>1</sup>H NMR (400 MHz, CDCl<sub>3</sub>) δ 7.51 – 7.45 (m, 2H), 7.40 – 7.28 (m, 4H), 6.99 – 6.84 (m, 2H), 6.26 (d,  $J = 15.5$  Hz, 1H), 2.32 (s, 3H). The analytical data are consistent with those reported in the literature.<sup>3</sup>

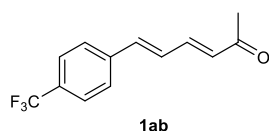

(3E,5E)-6-(4-(trifluoromethyl)phenyl)hexa-3,5-dien-2-one (**1ab**). (According to the general procedure C). Eluent: PE/EA = 20:1, light yellow solid (185 mg, 39%, m.p. 55 – 57 °C). <sup>1</sup>H NMR (400 MHz, CDCl<sub>3</sub>) δ 7.66 – 7.54 (m, 4H), 7.34 – 7.25 (m, 1H), 7.01 – 6.91 (m, 2H), 6.32 (d,  $J = 15.5$  Hz, 1H), 2.34 (s, 3H). The analytical data are consistent with those reported in the literature.<sup>8</sup>

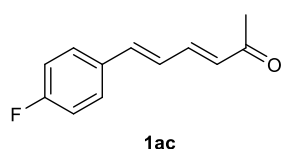

(3E,5E)-6-(4-fluorophenyl)hexa-3,5-dien-2-one (**1ac**). (According to the general procedure C). Eluent: PE/EA = 20:1, yellow oil (214 mg, 56%). <sup>1</sup>H NMR (400 MHz, CDCl<sub>3</sub>) δ 7.49 – 7.42 (m, 2H), 7.32 – 7.22 (m, 1H), 7.10 – 7.02 (m, 2H), 6.91 (d,  $J = 15.6$  Hz, 1H), 6.85 – 6.74 (m, 1H), 6.25 (d,  $J = 15.5$  Hz, 1H), 2.32 (s, 3H). The analytical data are consistent with those reported in the literature.<sup>9</sup>

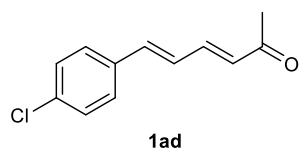

(3E,5E)-6-(4-chlorophenyl)hexa-3,5-dien-2-one (**1ad**). (According to the general procedure C). Eluent: PE/EA = 10:1, yellow solid (120 mg, 29%, m.p. 80 – 81 °C). <sup>1</sup>H NMR (400 MHz, CDCl<sub>3</sub>) δ 7.43 – 7.38 (m, 2H), 7.36 – 7.31 (m, 2H), 7.31 – 7.23 (m, 1H), 6.95 – 6.79 (m, 2H), 6.27 (d,  $J = 15.5$  Hz, 1H), 2.33 (s, 3H). The analytical data are consistent with those reported in the literature.<sup>8</sup>

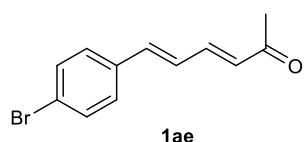

(3E,5E)-6-(4-bromophenyl)hexa-3,5-dien-2-one (**1ae**).

(According to the general procedure C). Eluent: PE/EA = 10:1, yellow solid (161 mg, 32%, m.p. 104 – 105 °C). <sup>1</sup>H

NMR (400 MHz, CDCl<sub>3</sub>) δ 7.53 – 7.47 (m, 2H), 7.37 – 7.32 (m, 2H), 7.31 – 7.23 (m, 1H), 6.93 – 6.81 (m, 2H), 6.28 (d, *J* = 15.5 Hz, 1H), 2.33 (s, 3H). The analytical data are consistent with those reported in the literature. The analytical data are consistent with those reported in the literature.<sup>8</sup>

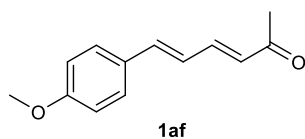

(3E,5E)-6-(4-methoxyphenyl)hexa-3,5-dien-2-one (**1af**).

(According to the general procedure C). Yellow solid (325 mg, 80%, m.p. 101 – 103 °C). <sup>1</sup>H NMR (400 MHz, CDCl<sub>3</sub>)

δ 7.46 – 7.40 (m, 2H), 7.33 – 7.24 (m, 1H), 6.92 – 6.87 (m, 3H), 6.81 – 6.73 (m, 1H), 6.22 (d, *J* = 15.5 Hz, 1H), 3.84 (s, 3H), 2.31 (s, 3H). The analytical data are consistent with those reported in the literature.<sup>8</sup>

### 3. Experimental Section

#### (1) Optimization of the reaction conditions.

**Table S1: Screening of various additives for optimizing the reaction conditions of synthesis of 3aa.**<sup>a</sup>

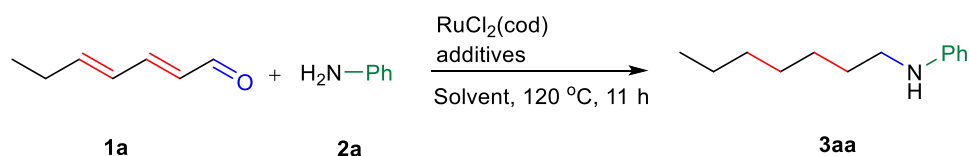

| Entry | Cat. (10 mol%)          | Additive                                    | Solvent       | Yield <sup>b</sup> of 3aa (%) |
|-------|-------------------------|---------------------------------------------|---------------|-------------------------------|
| 1     | RuCl <sub>2</sub> (cod) | Cs <sub>2</sub> CO <sub>3</sub> (1.0 equiv) | <i>i</i> PrOH | 32                            |
| 2     | RuCl <sub>2</sub> (cod) | Cs <sub>2</sub> CO <sub>3</sub> (0.5 equiv) | <i>i</i> PrOH | 48                            |
| 3     | RuCl <sub>2</sub> (cod) | Cs <sub>2</sub> CO <sub>3</sub> (0.2 equiv) | <i>i</i> PrOH | 59                            |
| 4     | RuCl <sub>2</sub> (cod) | Cs <sub>2</sub> CO <sub>3</sub> (0.1 equiv) | <i>i</i> PrOH | 23                            |
| 5     | RuCl <sub>2</sub> (cod) | Na <sub>2</sub> CO <sub>3</sub> (1.0 equiv) | <i>i</i> PrOH | 57                            |
| 6     | RuCl <sub>2</sub> (cod) | Na <sub>2</sub> CO <sub>3</sub> (0.5 equiv) | <i>i</i> PrOH | 38                            |
| 7     | RuCl <sub>2</sub> (cod) | Na <sub>2</sub> CO <sub>3</sub> (0.2 equiv) | <i>i</i> PrOH | 37                            |
| 8     | RuCl <sub>2</sub> (cod) | K <sub>2</sub> CO <sub>3</sub> (1.5 equiv)  | <i>i</i> PrOH | 40                            |

|    |                         |                                             |               |    |
|----|-------------------------|---------------------------------------------|---------------|----|
| 9  | RuCl <sub>2</sub> (cod) | K <sub>2</sub> CO <sub>3</sub> (1.0 equiv)  | <i>i</i> PrOH | 21 |
| 10 | RuCl <sub>2</sub> (cod) | Ag <sub>2</sub> CO <sub>3</sub> (1.0 equiv) | <i>i</i> PrOH | 11 |
| 11 | RuCl <sub>2</sub> (cod) | CH <sub>3</sub> ONa (1.0 equiv)             | <i>i</i> PrOH | 39 |
| 12 | RuCl <sub>2</sub> (cod) | HCOONa (1.0 equiv)                          | <i>i</i> PrOH | 59 |
| 13 | RuCl <sub>2</sub> (cod) | KOH (1.0 equiv)                             | <i>i</i> PrOH | 52 |
| 14 | RuCl <sub>2</sub> (cod) | KOH (0.5 equiv)                             | <i>i</i> PrOH | 61 |

<sup>a</sup>Reaction conditions: **1a** (0.1 mmol), **2a** (0.15 mmol), RuCl<sub>2</sub>(cod) (10 mol%), solvent (1.0 mL), 120 °C, 11 h. <sup>b</sup>isolated yields.

**Table S2: Screening of ligands for optimizing the reaction conditions of synthesis of **3aa**.**<sup>a</sup>

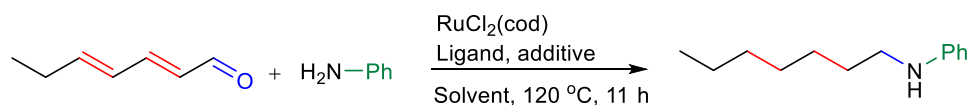

| Entry            | Cat. (x mol%)           | Ligand                   | Additive                                    | Solvent                          | Yield <sup>g</sup> of <b>3aa</b> (%) |
|------------------|-------------------------|--------------------------|---------------------------------------------|----------------------------------|--------------------------------------|
| 1 <sup>b</sup>   | RuCl <sub>2</sub> (cod) | L <sub>1</sub> (20 mol%) | HCOONa (1.0 equiv)                          | <i>i</i> PrOH                    | trace                                |
| 2 <sup>b</sup>   | RuCl <sub>2</sub> (cod) | L <sub>2</sub> (20 mol%) | CS <sub>2</sub> CO <sub>3</sub> (0.2 equiv) | <i>i</i> PrOH                    | 71                                   |
| 3 <sup>b</sup>   | RuCl <sub>2</sub> (cod) | L <sub>2</sub> (20 mol%) | HCOONa (1.0 equiv)                          | <i>i</i> PrOH                    | 95                                   |
| 4 <sup>b</sup>   | RuCl <sub>2</sub> (cod) | L <sub>2</sub> (20 mol%) | Na <sub>2</sub> CO <sub>3</sub> (1.0 equiv) | <i>i</i> PrOH                    | 65                                   |
| 5 <sup>b</sup>   | RuCl <sub>2</sub> (cod) | L <sub>2</sub> (20 mol%) | KOH (0.5 equiv)                             | <i>i</i> PrOH                    | 38                                   |
| 6 <sup>c</sup>   | RuCl <sub>2</sub> (cod) | L <sub>2</sub> (20 mol%) | HCOONa (1.0 equiv)                          | <i>i</i> PrOH                    | 92                                   |
| 7 <sup>c</sup>   | RuCl <sub>2</sub> (cod) | L <sub>2</sub> (10 mol%) | HCOONa (1.0 equiv)                          | <i>i</i> PrOH                    | 80                                   |
| 8 <sup>c</sup>   | RuCl <sub>2</sub> (cod) | L <sub>2</sub> (20 mol%) | HCOONa (0.5 equiv)                          | <i>i</i> PrOH                    | 55                                   |
| 9 <sup>c</sup>   | RuCl <sub>2</sub> (cod) | L <sub>2</sub> (20 mol%) | HCOONa (1.5 equiv)                          | <i>i</i> PrOH                    | 67                                   |
| 10 <sup>ce</sup> | RuCl <sub>2</sub> (cod) | L <sub>2</sub> (20 mol%) | HCOONa (1.0 equiv)                          | <i>i</i> PrOH                    | 85                                   |
| 11 <sup>cf</sup> | RuCl <sub>2</sub> (cod) | L <sub>2</sub> (20 mol%) | HCOONa (1.0 equiv)                          | <i>i</i> PrOH                    | 50                                   |
| 12 <sup>c</sup>  | RuCl <sub>2</sub> (cod) | L <sub>2</sub> (20 mol%) | HCOONa (1.0 equiv)                          | H <sub>2</sub> O                 | n.d.                                 |
| 13 <sup>d</sup>  | RuCl <sub>2</sub> (cod) | L <sub>2</sub> (20 mol%) | HCOONa (1.0 equiv)                          | <i>i</i> PrOH                    | 61                                   |
| 14               | ---                     | L <sub>2</sub> (20 mol%) | HCOONa (1.0 equiv)                          | <i>i</i> PrOH                    | n.d.                                 |
| 15 <sup>b</sup>  | RuCl <sub>2</sub> (cod) | L <sub>2</sub> (20 mol%) | ---                                         | <i>i</i> PrOH                    | trace                                |
| 16 <sup>b</sup>  | RuCl <sub>2</sub> (cod) | L <sub>3</sub> (20 mol%) | CS <sub>2</sub> CO <sub>3</sub> (0.2 equiv) | <i>i</i> PrOH                    | n.r.                                 |
| 17 <sup>b</sup>  | RuCl <sub>2</sub> (cod) | L <sub>4</sub> (20 mol%) | CS <sub>2</sub> CO <sub>3</sub> (0.2 equiv) | <i>i</i> PrOH                    | n.r.                                 |
| 18 <sup>b</sup>  | RuCl <sub>2</sub> (cod) | L <sub>5</sub> (20 mol%) | CS <sub>2</sub> CO <sub>3</sub> (0.2 equiv) | <i>i</i> PrOH                    | n.r.                                 |
| 19 <sup>b</sup>  | RuCl <sub>2</sub> (cod) | L <sub>6</sub> (20 mol%) | CS <sub>2</sub> CO <sub>3</sub> (0.2 equiv) | <i>i</i> PrOH                    | trace                                |
| 20 <sup>b</sup>  | RuCl <sub>2</sub> (cod) | ---                      | Na <sub>2</sub> CO <sub>3</sub> (1.0 equiv) | C <sub>2</sub> H <sub>5</sub> OH | 46                                   |
| 21 <sup>b</sup>  | RuCl <sub>2</sub> (cod) | ---                      | Na <sub>2</sub> CO <sub>3</sub> (1.0 equiv) | DCM/<br><i>i</i> PrOH (1:1)      | trace                                |

22<sup>b</sup> RuCl<sub>2</sub>(cod) --- Na<sub>2</sub>CO<sub>3</sub> (1.0 equiv) CH<sub>3</sub>CN/  
iPrOH (1:1) trace

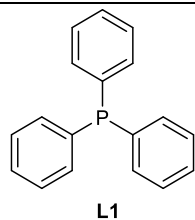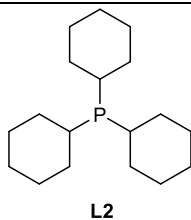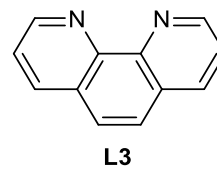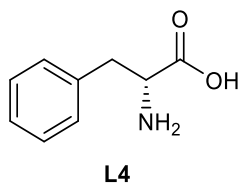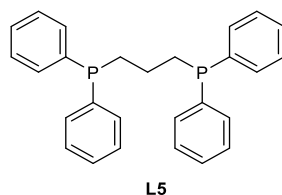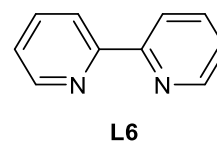

<sup>a</sup>Reaction conditions: **1a** (0.1 mmol), **2a** (0.15 mmol), solvent (1.0 mL), 120 °C, 11 h. <sup>b</sup>RuCl<sub>2</sub>(cod) (10 mol%). <sup>c</sup>RuCl<sub>2</sub>(cod) (5 mol%). <sup>d</sup>RuCl<sub>2</sub>(cod) (2 mol%). <sup>e</sup>**1a** (0.1 mmol), **2a** (0.12 mmol). <sup>f</sup>**1a** (0.15 mmol), **2a** (0.1 mmol). <sup>g</sup>isolated yields. n.d. = not detected, n.r. = no reaction.

**Table S3: Screening of other conditions for optimizing the reaction conditions of synthesis of **3aa**.**<sup>a</sup>

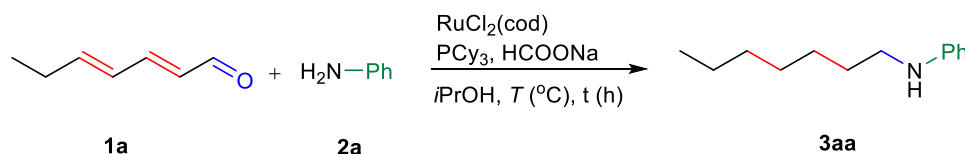

| Entry | Ligand (x mol%)            | T (°C) | t (h) | Yield <sup>b</sup> of <b>3aa</b> (%) |
|-------|----------------------------|--------|-------|--------------------------------------|
| 1     | PCy <sub>3</sub> (20 mol%) | 90     | 11    | 39                                   |
| 2     | PCy <sub>3</sub> (20 mol%) | 100    | 11    | 66                                   |
| 3     | PCy <sub>3</sub> (20 mol%) | 110    | 11    | 81                                   |
| 4     | PCy <sub>3</sub> (20 mol%) | 120    | 9     | 80                                   |
| 5     | PCy <sub>3</sub> (20 mol%) | 120    | 11    | 95                                   |
| 6     | PCy <sub>3</sub> (20 mol%) | 120    | 13    | 91                                   |
| 7     | PCy <sub>3</sub> (20 mol%) | 120    | 15    | 85                                   |
| 8     | PCy <sub>3</sub> (10 mol%) | 120    | 11    | 65                                   |
| 9     | PCy <sub>3</sub> (30 mol%) | 120    | 11    | 93                                   |
| 10    | PCy <sub>3</sub> (50 mol%) | 120    | 11    | 73                                   |

<sup>a</sup>Reaction conditions: **1a** (0.1 mmol), **2a** (0.15 mmol), RuCl<sub>2</sub>(cod) (10 mol%), HCOONa (0.1 mmol), solvent (1.0 mL). <sup>b</sup>isolated yields.

## (2) General procedures for the synthesis of products **3**.

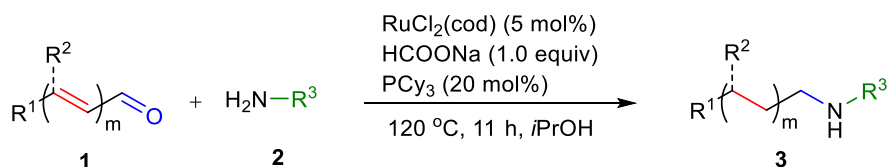

A mixture of  $\text{RuCl}_2(\text{cod})$  (5 mol%, 0.005 mmol, 1.4 mg),  $\text{HCOONa}$  (1.0 equivalent, 0.1 mmol, 6.8 mg),  $\text{PCy}_3$  (20 mol%, 0.02 mmol, 5.6 mg) were charged into a reaction tube, and then to which were added **1** (1.0 equivalent, 0.1 mmol), **2** (1.5 equivalents, 0.15 mmol) and dry *i*PrOH (1.0 mL) under  $\text{N}_2$  atmosphere. The reaction mixture was stirred at 120 °C heated by metal sand bath for 11 h. After the solvent was removed under reduced pressure, the residue was purified by flash-column chromatography to afford **3** (**3aa** – **3va**).

### (3) Synthesis of product **3aaa**.

A mixture of  $\text{RuCl}_2(\text{cod})$  (5 mol%, 0.005 mmol, 1.4 mg),  $\text{HCOOH}$  (4.0 equivalent, 0.4 mmol, 18.4 mg),  $\text{PCy}_3$  (20 mol%, 0.02 mmol, 5.6 mg) were charged into a reaction tube, and then to which were added **1aa** (1.0 equivalent, 0.1 mmol), **2a** (1.5 equivalents, 0.15 mmol) and dry *i*PrOH (1.0 mL) under  $\text{N}_2$  atmosphere. The reaction mixture was stirred at 120 °C heated by metal sand bath for 11 h. After the solvent was removed under reduced pressure, the residue was purified by flash-column chromatography to afford **3aaa**.

### (4) General procedures for the synthesis of products **4**.

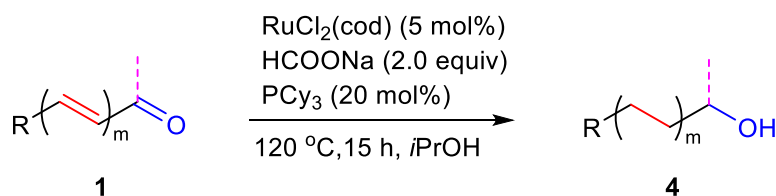

A mixture of  $\text{RuCl}_2(\text{cod})$  (5 mol%, 0.005 mmol, 1.4 mg),  $\text{HCOONa}$  (2.0 equivalents, 0.2 mmol, 13.6 mg),  $\text{PCy}_3$  (20 mol%, 0.02 mmol, 5.6 mg) were charged into a reaction tube, and then to which were added **1** (1.0 equivalent, 0.1 mmol) and dry *i*PrOH (1.0 mL) under  $\text{N}_2$  atmosphere. The reaction mixture was stirred at 120 °C heated by metal sand bath for 15 h. After the solvent was removed under reduced

pressure, the residue was purified by flash-column chromatography to afford **4** (**4a** – **4h**).

### (5) Synthesis of product **3qa**.

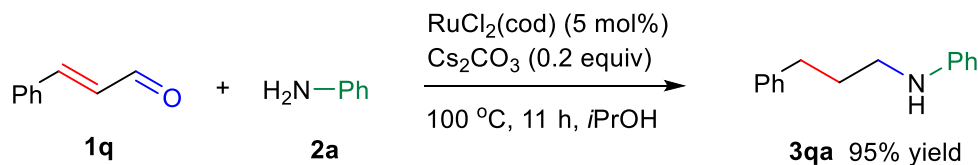

A mixture of RuCl<sub>2</sub>(cod) (5 mol%, 0.005 mmol, 1.4 mg), and Cs<sub>2</sub>CO<sub>3</sub> (20 mol%, 0.02 mmol, 6.5 mg) were charged into a reaction tube, and then to which were added **1q** (1.0 equivalent, 0.1 mmol, 13.2 mg), **2a** (1.5 equivalents, 0.15 mmol, 14.0 mg) and dry *i*PrOH (1.0 mL) under N<sub>2</sub> atmosphere. The reaction mixture was stirred at 100 °C heated by metal sand bath for 11 h. After the solvent was removed under reduced pressure, the residue was purified by flash-column chromatography to afford **3qa** (20.0 mg, 95% yield).

### (6) Scale-up experiment.

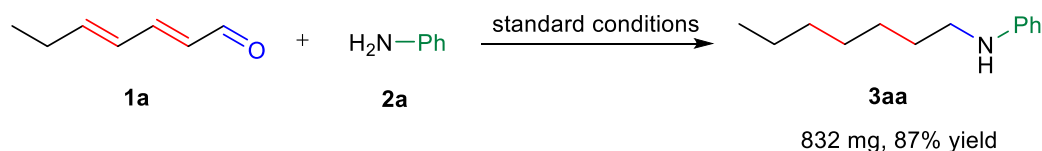

A mixture of RuCl<sub>2</sub>(cod) (5 mol%, 0.25 mmol, 70 mg), HCOONa (1.0 equivalent, 5.0 mmol, 340 mg), PCy<sub>3</sub> (20 mol%, 1.0 mmol, 280.4 mg) were charged into an oven-dried flask with a stir bar, and then to which were added **1a** (1.0 equivalent, 5.0 mmol, 550.8 mg), **2a** (1.5 equivalents, 7.5 mmol, 698.5 mg) and dry *i*PrOH (50 mL) under N<sub>2</sub> atmosphere. The reaction mixture was stirred at 120 °C heated by metal sand bath for 11 h. After the solvent was removed under reduced pressure, the residue was purified by flash-column chromatography using PE/ EA =50:1 to afford **3aa** (832 mg, 87% yield). [RuCl<sub>2</sub>(cod) (2 mol%), (337 mg, 35% yield)].

### (7) Synthesis of product **5a**.<sup>10</sup>

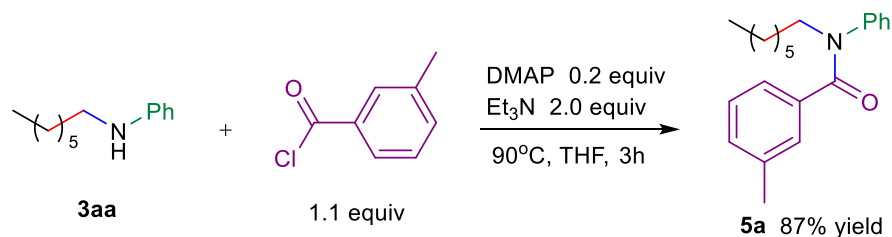

To an ice-cooled solution of **3aa** (1.0 equivalent, 0.1 mmol, 19.1 mg), DMAP (20 mol%, 0.02 mmol, 2.4 mg) and Et<sub>3</sub>N (2.0 equivalents, 0.2 mmol, 20.2 mg) in THF (1.0 mL) was added 3-methylbenzoyl chloride (1.1 equivalents, 0.11 mmol, 17.0 mg), and the mixture was stirred at 90 °C heated by metal sand bath for 3 h. After the solvent was removed under reduced pressure, the residue was purified by flash-column chromatography to afford **5a**.

#### (8) Synthesis of product **5b**.<sup>11</sup>

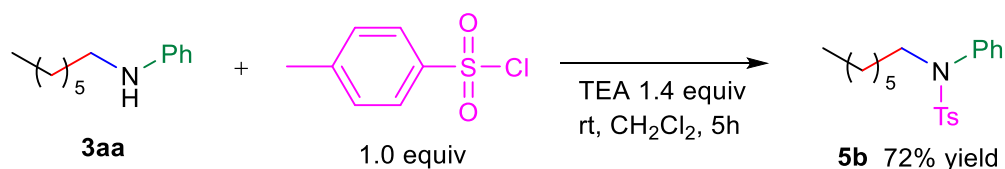

To a 25 mL dried Schlenk flask with a stir bar was added **3aa** (1.0 equivalent, 0.1 mmol, 19.1 mg), 4-methylbenzenesulfonyl chloride (1.0 equivalent, 0.1 mmol, 19.1 mg) and dry CH<sub>2</sub>Cl<sub>2</sub> (1.0 mL) at 0°C under N<sub>2</sub> atmosphere, followed by a slight excess of TEA (1.4 equivalents, 0.14 mmol, 14.2 mg) and the reaction was stirred 5h at room temperature. After the solvent was removed under reduced pressure, the residue was purified by flash-column chromatography to afford **5b**.

#### (9) Synthesis of product **5c**.<sup>12</sup>

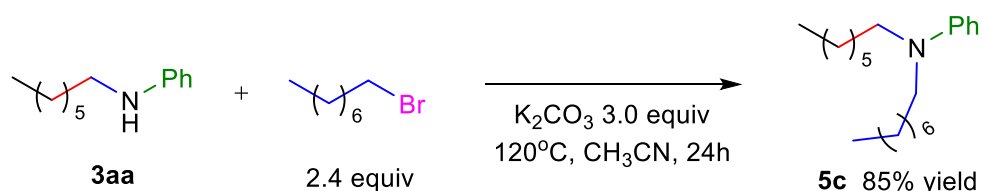

A mixture of **3aa** (1.0 equivalent, 0.2 mmol, 38.2 mg), K<sub>2</sub>CO<sub>3</sub> (3.0 equivalents, 0.6 mmol, 82.9 mg), n-Octyl Bromide (2.4 equivalents, 0.48 mmol, 92.7 mg), and CH<sub>3</sub>CN (2.0 mL) was stirred under N<sub>2</sub> at 120 °C for about 24h. After the solvent was

removed under reduced pressure, the crude product was purified by flash-column chromatography to afford **5c**.

### (10) Synthesis of product **3xr**.

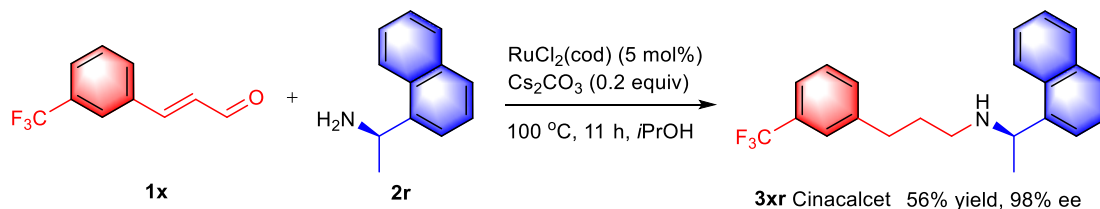

A mixture of  $\text{RuCl}_2(\text{cod})$  (5 mol%, 0.005 mmol, 1.4 mg),  $\text{Cs}_2\text{CO}_3$  (20 mol%, 0.02 mmol, 6.5 mg) were charged into a reaction tube, and then to which were added **1x** (1.0 equivalent, 0.1 mmol, 20 mg), **2r** (1.5 equivalents, 0.15 mmol, 25.7 mg) and dry *i*PrOH (1.0 mL) under  $\text{N}_2$  atmosphere. The reaction mixture was stirred at 100 °C heated by metal sand bath for 11 h. After the solvent was removed under reduced pressure, the residue was purified by flash-column chromatography to afford **3xr**.

Using the general procedure as above described. Isolated yield: 56%, ee: 98%. The ee value was determined by HPLC (chiralpak IG, n-hexane/*i*PrOH 98:2, flow rate = 0.5 mL/min).

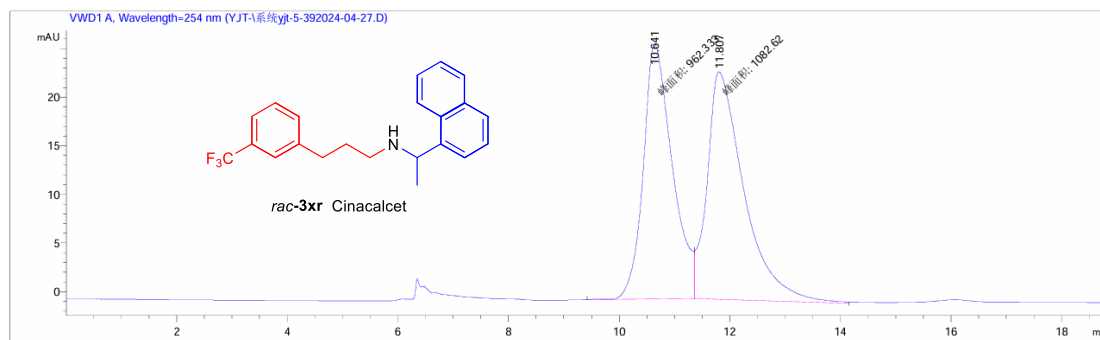

| # | [min]     | [min]  | [mAU*s]    | [mAU]    | %       |
|---|-----------|--------|------------|----------|---------|
| 1 | 10.641 MM | 0.6104 | 962.33264  | 26.27483 | 47.0589 |
| 2 | 11.807 MM | 0.7705 | 1082.62280 | 23.41745 | 52.9411 |



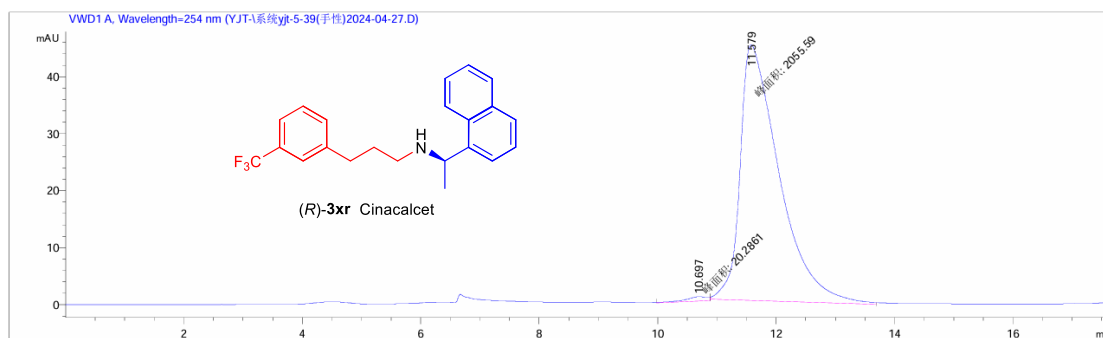

| # | [min]  | [min] | [mAU*s] | [mAU]      | %          |         |
|---|--------|-------|---------|------------|------------|---------|
| 1 | 10.697 | MM    | 0.4430  | 20.28605   | 7.63252e-1 | 0.9772  |
| 2 | 11.579 | MM    | 0.7640  | 2055.59473 | 44.84539   | 99.0228 |

### (11) Synthesis of product **int-1**.<sup>13</sup>

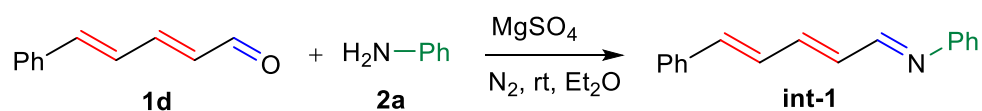

To a 50 mL dried Schlenk flask with a stir bar was added anhydrous  $\text{MgSO}_4$  (1.0 equivalent, 2.0 mmol, 240.7 mg), **1d** (1.0 equivalent, 2.0 mmol, 316.4 mg), **2a** (1.0 equivalent, 2.0 mmol, 186.3 mg) and anhydrous  $\text{Et}_2\text{O}$  (5.0 mL) under  $\text{N}_2$  atmosphere, and the reaction was stirred 10 h at room temperature. Dissolved with  $\text{CH}_2\text{Cl}_2$  (10.0 mL) and filtered out  $\text{MgSO}_4$ , then removed the solvent under reduced pressure, the residue was purified by neutral alumina column chromatography to afford **int-1** (hexane/ $\text{EtOAc}$ : 20/1).

## 4. Mechanistic Studies

### A Control experiments

(i)

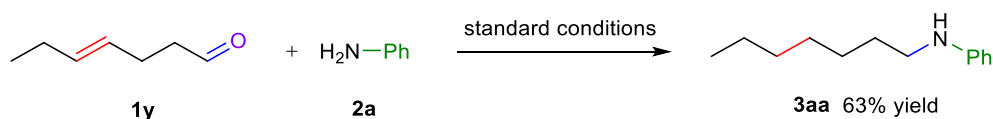

A mixture of  $\text{RuCl}_2(\text{cod})$  (5 mol%, 0.005 mmol, 1.4 mg),  $\text{HCOONa}$  (1.0 equivalent, 0.1 mmol, 6.8 mg),  $\text{PCy}_3$  (20 mol%, 0.02 mmol, 5.6 mg) were charged into a reaction tube, and then to which were added **1y** (1.0 equivalent, 0.1 mmol, 11.0 mg), **2a** (1.5 equivalents, 0.15 mmol, 14.0 mg) and dry  $i\text{PrOH}$  (1.0 mL) under  $\text{N}_2$  atmosphere. The

reaction mixture was stirred at 120 °C heated by metal sand bath for 11 h. After the solvent was removed under reduced pressure, the residue was purified by flash-column chromatography to afford **3aa**.

(ii)

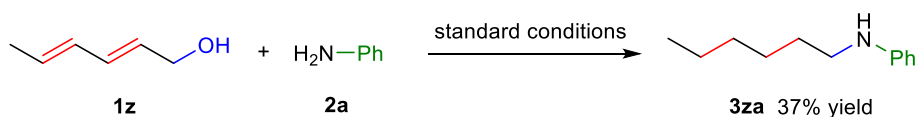

A mixture of RuCl<sub>2</sub>(cod) (5 mol%, 0.005 mmol, 1.4 mg), HCOONa (1.0 equivalent, 0.1 mmol, 6.8 mg), PCy<sub>3</sub> (20 mol%, 0.02 mmol, 5.6 mg) were charged into a reaction tube, and then to which were added **1z** (1.0 equivalent, 0.1 mmol, 9.8 mg), **2a** (1.5 equivalents, 0.15 mmol, 14.0 mg) and dry *i*PrOH (1.0 mL) under N<sub>2</sub> atmosphere. The reaction mixture was stirred at 120 °C heated by metal sand bath for 11 h. After the solvent was removed under reduced pressure, the residue was purified by flash-column chromatography to afford **3za**.

## B Deuterium labeling experiments

(iii)

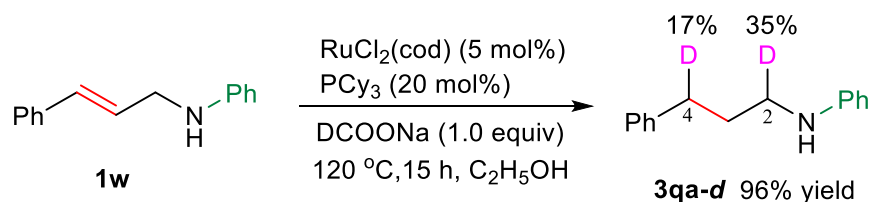

A mixture of RuCl<sub>2</sub>(cod) (5 mol%, 0.005 mmol, 1.4 mg), DCOONa (1.0 equivalent, 0.1 mmol, 7.0 mg), PCy<sub>3</sub> (20 mol%, 0.02 mmol, 5.6 mg) were charged into a reaction tube, and then to which were added **1w** (1.0 equivalent, 0.1 mmol, 20.9 mg), and dry CH<sub>3</sub>CH<sub>2</sub>OH (1.0 mL) under N<sub>2</sub> atmosphere. The reaction mixture was stirred at 120 °C heated by metal sand bath for 15 h. After the solvent was removed under reduced pressure, the residue was purified by flash-column chromatography to afford **3qa-d** (20.1 mg, 96% yield). [<sup>1</sup>H NMR analysis indicated 35%, 17% deuteration at the C(2), C(4) position, respectively.]

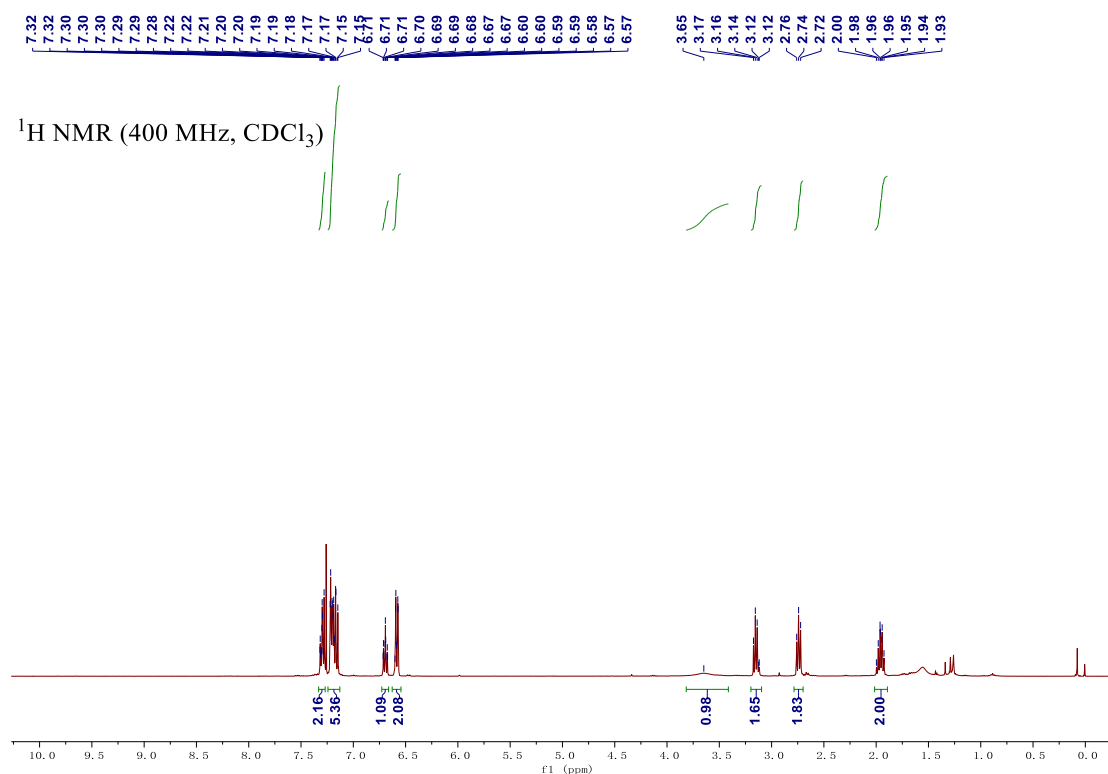

$^1\text{H}$  NMR spectrum of the product deuterated **3qa-d**

(iv-1)

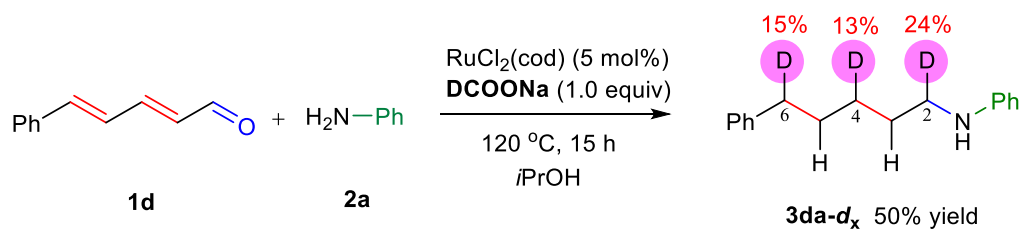

A mixture of  $\text{RuCl}_2(\text{cod})$  (5 mol%, 0.005 mmol, 1.4 mg) and  $\text{DCOONa}$  (1.0 equivalent, 0.1 mmol, 7.0 mg) were charged into a reaction tube, and then to which were added **1d** (1.0 equivalent, 0.1 mmol, 15.8 mg), **2a** (1.5 equivalents, 0.15 mmol, 14.0 mg) and dry *i*PrOH (1.0 mL) under  $\text{N}_2$  atmosphere. The reaction mixture was stirred at 120 °C heated by metal sand bath for 15 h. After the solvent was removed under reduced pressure, the residue was purified by flash-column chromatography to afford **3da-d<sub>x</sub>**. [ $^1\text{H}$  NMR analysis indicated 24%, 13%, 15% deuteration at the C(2), C(4), C(6) position, respectively.]

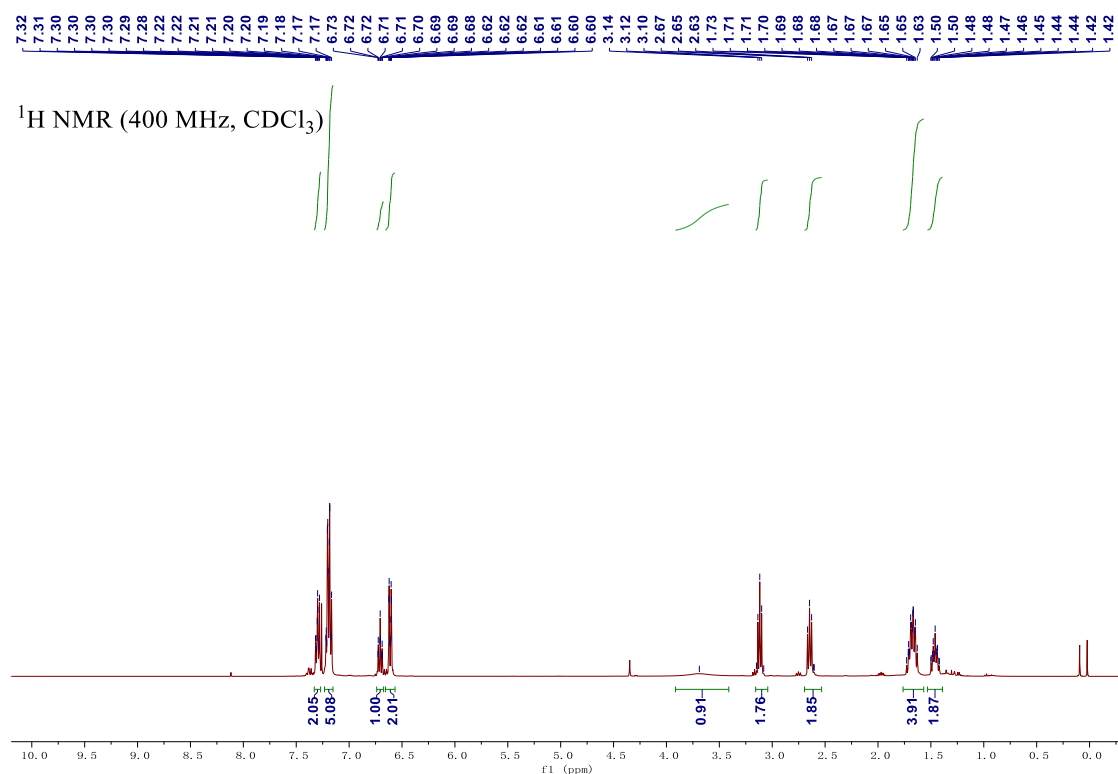

<sup>1</sup>H NMR spectrum of the product deuterated **3da-d<sub>x</sub>**

(iv-2)

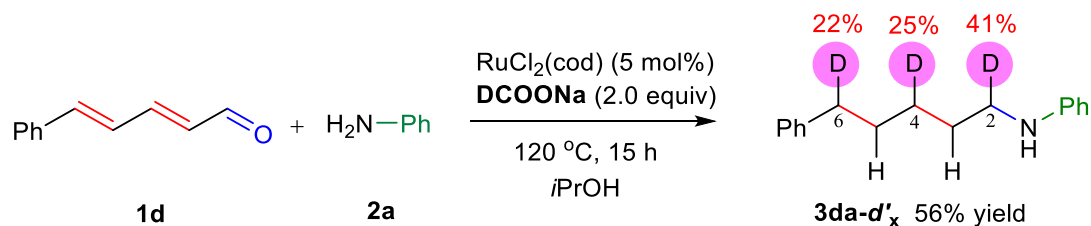

A mixture of RuCl<sub>2</sub>(cod) (5 mol%, 0.005 mmol, 1.4 mg) and DCOONa (2.0 equivalents, 0.2 mmol, 14.0 mg) were charged into a reaction tube, and then to which were added **1d** (1.0 equivalent, 0.1 mmol, 15.8 mg), **2a** (1.5 equivalents, 0.15 mmol, 14.0 mg) and dry *i*PrOH (1.0 mL) under N<sub>2</sub> atmosphere. The reaction mixture was stirred at 120 °C heated by metal sand bath for 15 h. After the solvent was removed under reduced pressure, the residue was purified by flash-column chromatography to afford **3da-d'<sub>x</sub>**. [<sup>1</sup>H NMR analysis indicated 41%, 25%, 22% deuteration at the C(2), C(4), C(6) position, respectively.]

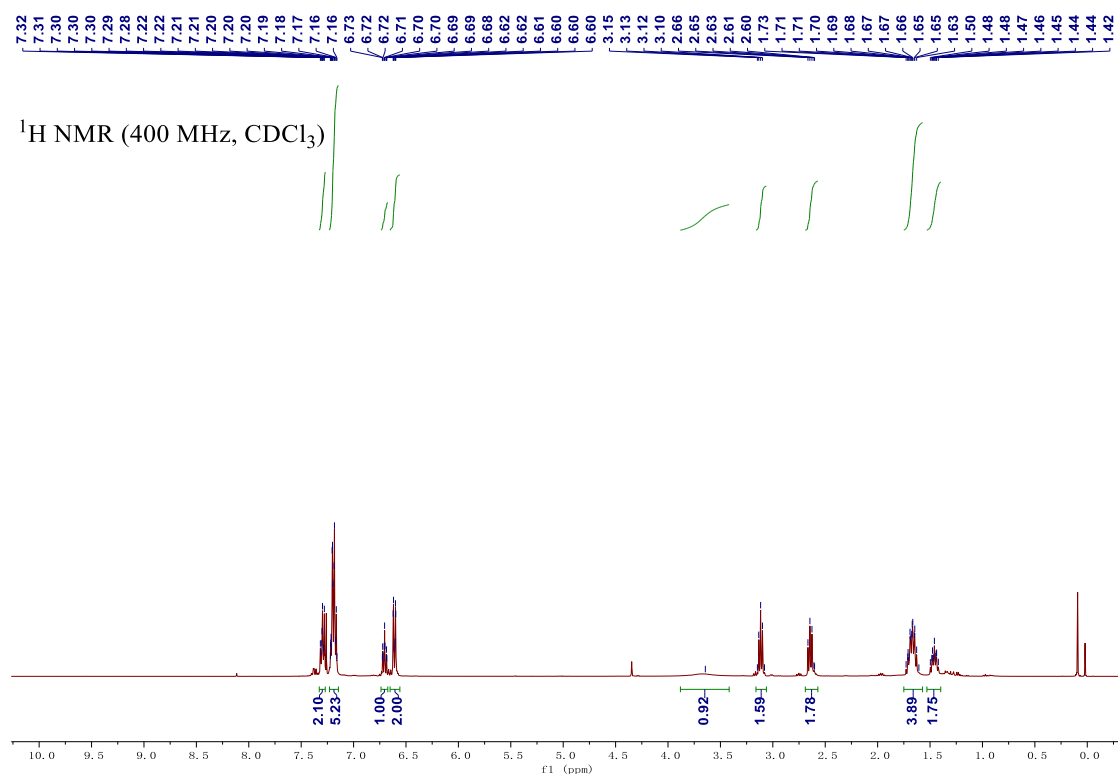

$^1\text{H}$  NMR spectrum of the product deuterated **3da-d'**<sub>x</sub>

(v)

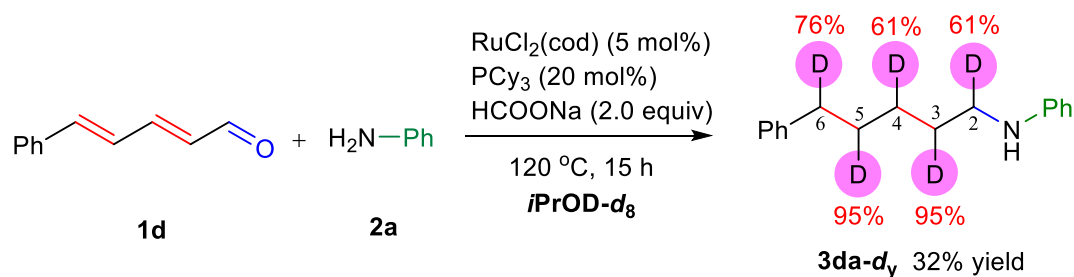

A mixture of  $\text{RuCl}_2(\text{cod})$  (5 mol%, 0.005 mmol, 1.4 mg),  $\text{HCOONa}$  (2.0 equivalents, 0.2 mmol, 13.6 mg),  $\text{PCy}_3$  (20 mol%, 0.02 mmol, 5.6 mg) were charged into a reaction tube, and then to which were added **1d** (1.0 equivalent, 0.1 mmol, 15.8 mg), **2a** (1.5 equivalents, 0.15 mmol, 14.0 mg) and dry **iPrOD- $d_8$**  (1.0 mL) under  $\text{N}_2$  atmosphere. The reaction mixture was stirred at 120 °C heated by metal sand bath for 15 h. After the solvent was removed under reduced pressure, the residue was purified by flash-column chromatography to afford **3da-d<sub>y</sub>**. [ $^1\text{H}$  NMR analysis indicated 61%, 95%, 61%, 95%, 76% deuteration at the C(2), C(3), C(4), C(5), C(6) position, respectively.]

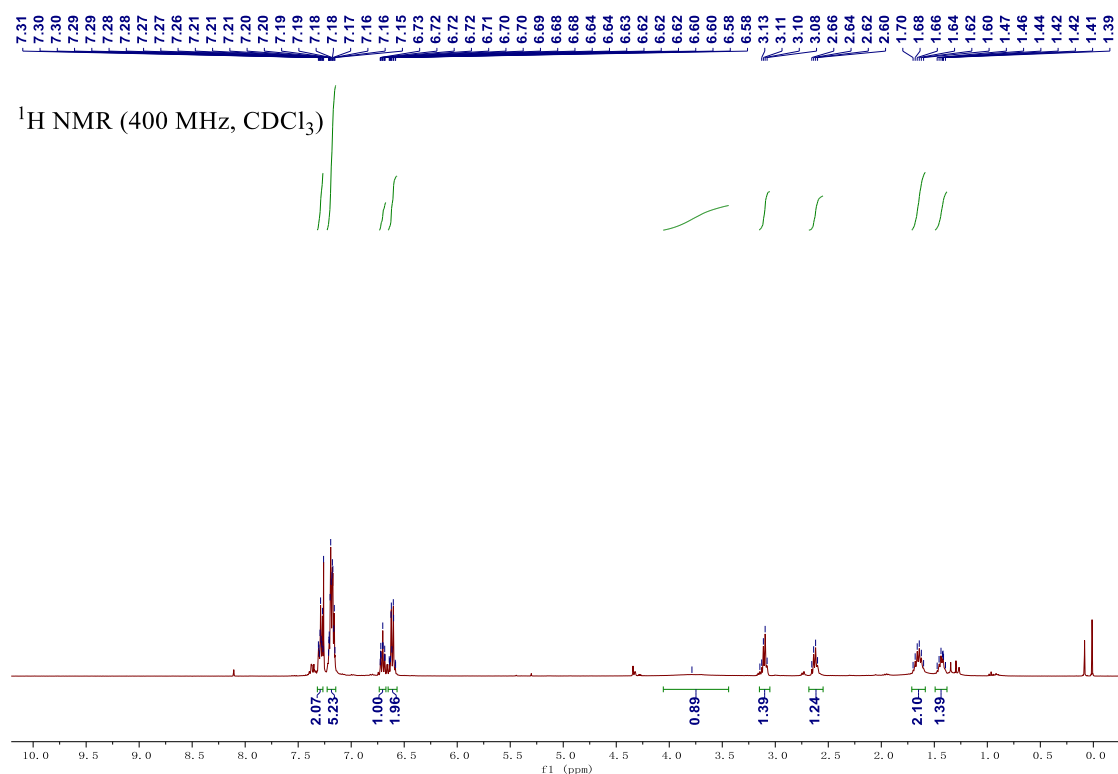

$^1\text{H}$  NMR spectrum of the product deuterated **3da-d<sub>y</sub>**

(vi)

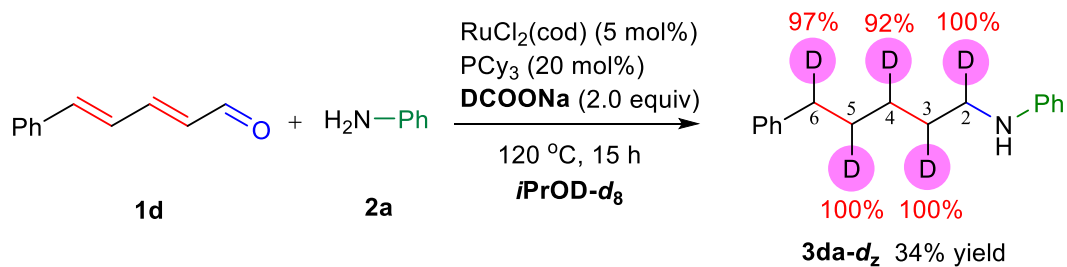

A mixture of RuCl<sub>2</sub>(cod) (5 mol%, 0.005 mmol, 1.4 mg), DCOONa (2.0 equivalents, 0.2 mmol, 14.0 mg), PCy<sub>3</sub> (20 mol%, 0.02 mmol, 5.6 mg) were charged into a reaction tube, and then to which were added **1d** (1.0 equivalent, 0.1 mmol, 15.8 mg), **2a** (1.5 equivalents, 0.15 mmol, 14.0 mg) and dry *i*PrOD-**d**<sub>8</sub> (1.0 mL) under N<sub>2</sub> atmosphere. The reaction mixture was stirred at 120 °C heated by metal sand bath for 15 h. After the solvent was removed under reduced pressure, the residue was purified by flash-column chromatography to afford **3da-d<sub>z</sub>**. [ $^1\text{H}$  NMR analysis indicated 100%, 100%, 92%, 100%, 97% deuteration at the C(2), C(3), C(4), C(5), C(6) position, respectively.]

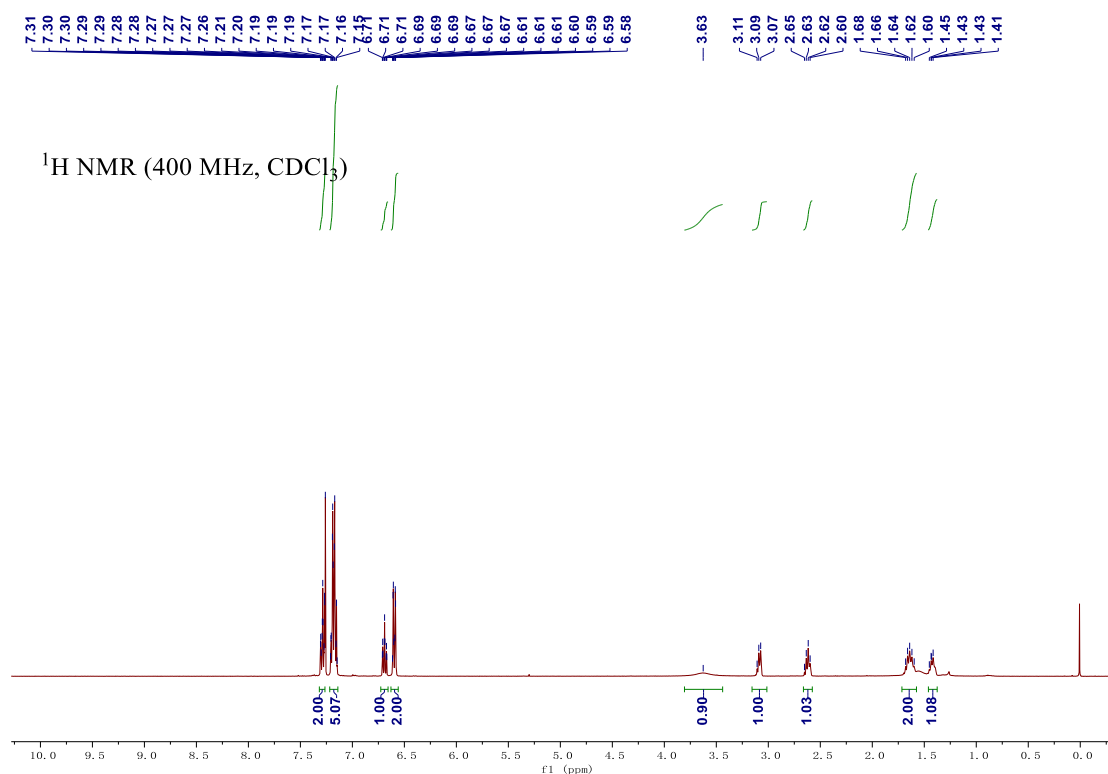

$^1\text{H}$  NMR spectrum of the product deuterated **3da-d<sub>z</sub>**

(vii)

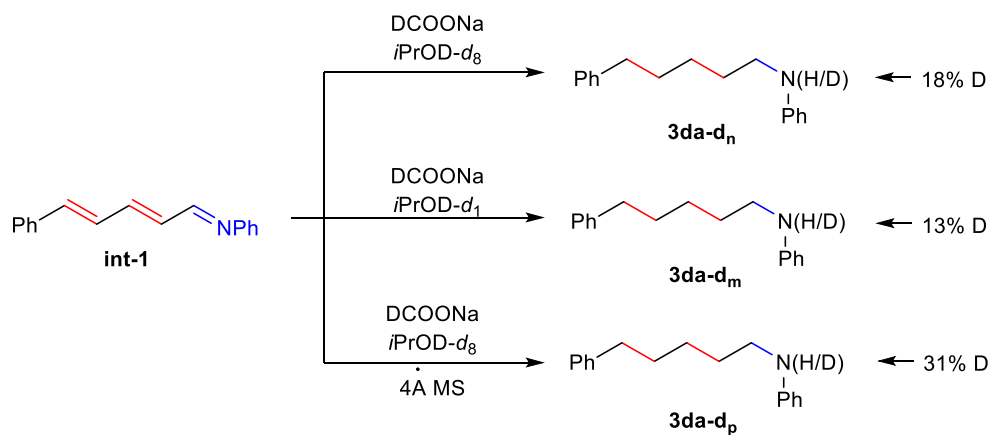

A mixture of  $\text{RuCl}_2(\text{cod})$  (5 mol%, 0.005 mmol, 1.4 mg),  $\text{DCOONa}$  (2.0 equivalents, 0.2 mmol, 14.0 mg),  $\text{PCy}_3$  (20 mol%, 0.02 mmol, 5.6 mg) were charged into a reaction tube, and then to which were added **int-1** (1.0 equivalent, 0.1 mmol, 23.3 mg) and **iPrOD-d<sub>8</sub>** (1.0 mL) under  $\text{N}_2$  atmosphere. The reaction mixture was stirred at  $120^\circ\text{C}$  heated by metal sand bath for 15 h. After the solvent was removed under reduced pressure, the crude product **3da-d<sub>n</sub>** was obtained. [DMSO- $\text{d}_6$  analysis indicated 18% deuteration at the N position.]

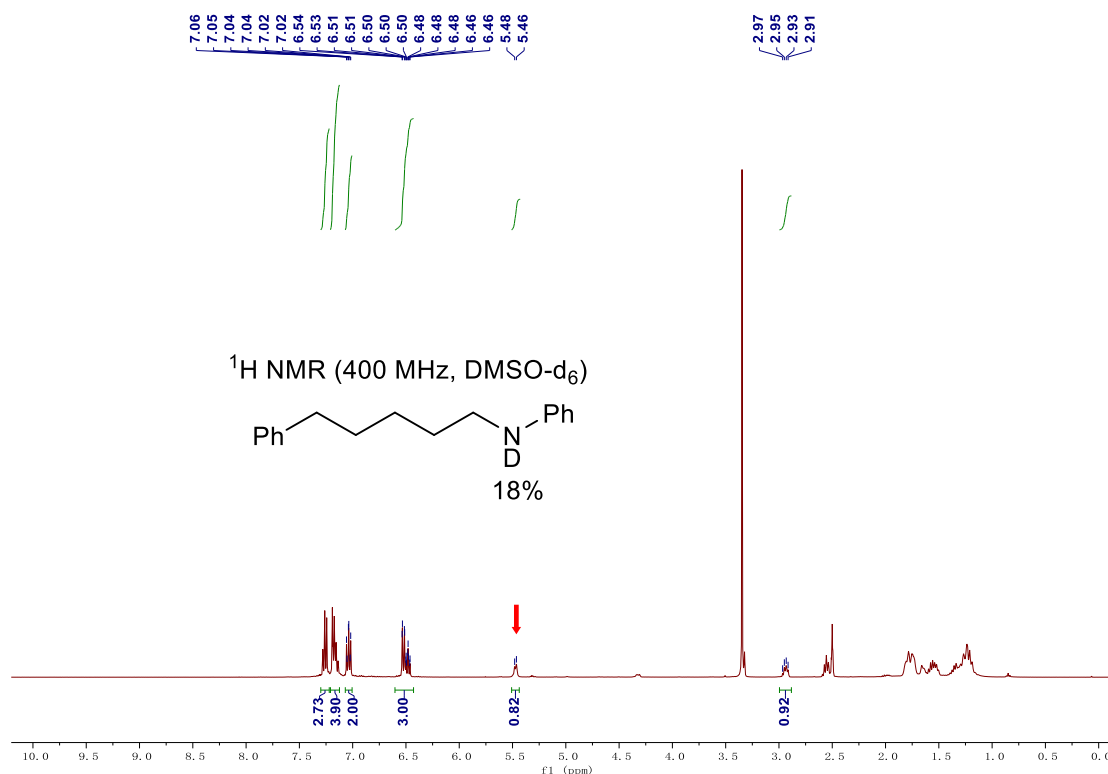

A mixture of RuCl<sub>2</sub>(cod) (5 mol%, 0.005 mmol, 1.4 mg), DCOONa (2.0 equivalents, 0.2 mmol, 14.0 mg), PCy<sub>3</sub> (20 mol%, 0.02 mmol, 5.6 mg) were charged into a reaction tube, and then to which were added **int-1** (1.0 equivalent, 0.1 mmol, 23.3 mg) and **iPrOD-d<sub>1</sub>** (1.0 mL) under N<sub>2</sub> atmosphere. The reaction mixture was stirred at 120 °C heated by metal sand bath for 15 h. After the solvent was removed under reduced pressure, the crude product **3da-d<sub>m</sub>** was obtained. [DMSO-d<sub>6</sub> analysis indicated 13% deuteration at the N position.]



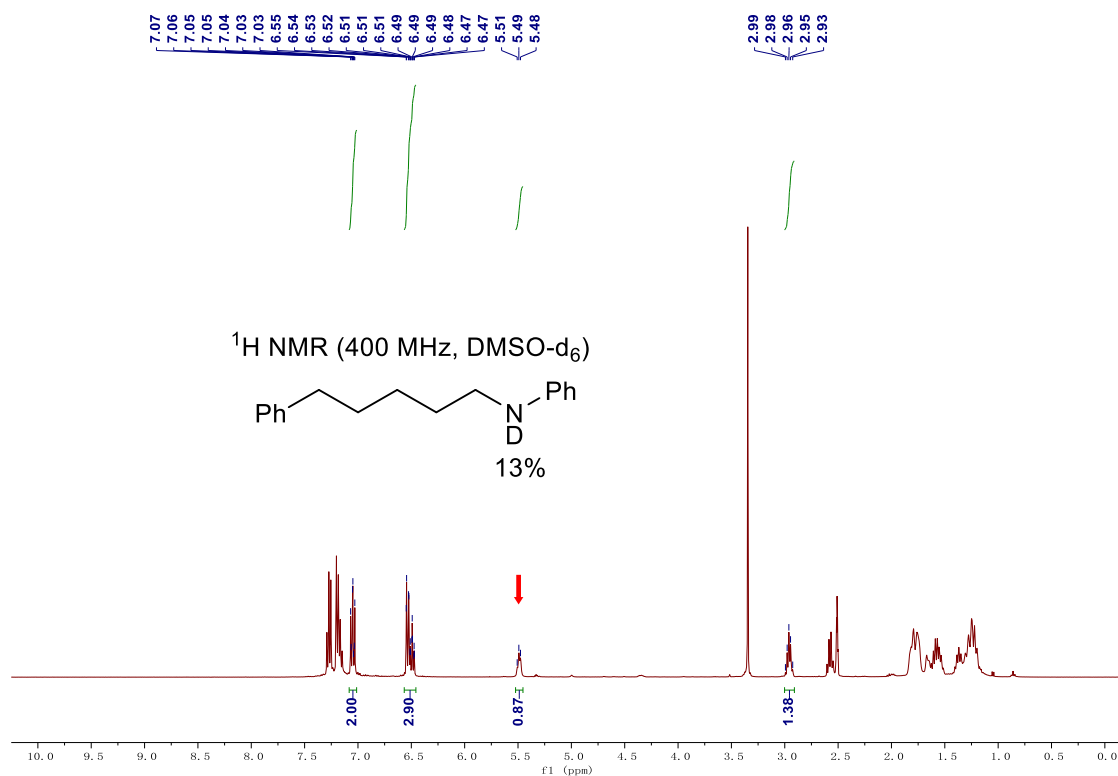

A mixture of RuCl<sub>2</sub>(cod) (5 mol%, 0.005 mmol, 1.4 mg), DCOONa (2.0 equivalents, 0.2 mmol, 14.0 mg), PCy<sub>3</sub> (20 mol%, 0.02 mmol, 5.6 mg), 4Å MS (100 mg) were charged into a reaction tube, and then to which were added **int-1** (1.0 equivalent, 0.1 mmol, 23.3 mg) and **iPrOD-d<sub>8</sub>** (1.0 mL) under N<sub>2</sub> atmosphere. The reaction mixture was stirred at 120 °C heated by metal sand bath for 15 h. After the solvent was removed under reduced pressure, the crude product **3da-d<sub>p</sub>** was obtained. [DMSO-d<sub>6</sub> analysis indicated 31% deuteration at the N position.]

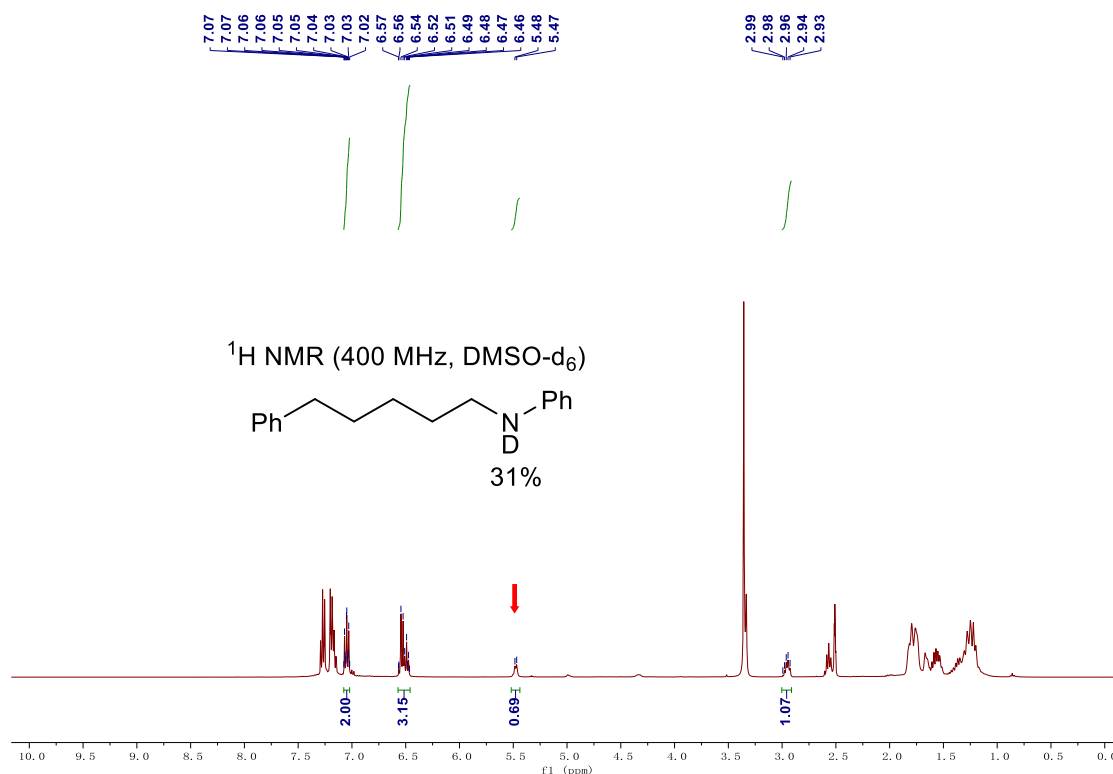

## 5. References

- (1) P. Kumar, N. Kaur, R. Kumar and P. Banerjee,  $\alpha,\beta$ -Unsaturated Carbonyls for One-Pot Transition-Metal-Free Access to 3,6-Dihydro-2H-pyrans, *J. Org. Chem.*, 2022, **87**, 7167–7178.
- (2) J. S. Meisner, D. F. Sedbrook, M. Krikorian, J. Chen, A. Sattler, M. E. Carnes, C. B. Murray, M. Steigerwald and C. Nuckolls, Functionalizing molecular wires: a tunable class of  $\alpha,\omega$ -diphenyl- $\mu,\nu$ -dicyano-oligoenes, *Chem. Sci.*, 2012, **3**, 1007–1014.
- (3) I. M. Ferreira, E. B. Meira, I. G. Rosset and A. L. M. Porto, Chemoselective biohydrogenation of  $\alpha,\beta$ - and  $\alpha,\beta,\gamma,\delta$ -unsaturated ketones by the marine-derived fungus *Penicillium citrinum* CBMAI 1186 in a biphasic system, *J. Mol. Catal. B: Enzym.*, 2015, **115**, 59–65.
- (4) J.-G. Zhao, X.-L. Zheng, S.-K. Tao, Y.-X. Zhu, J.-W. Yi, S.-B. Tang, R.-X. Li, H. Chen, H.-Y. Fu and M.-L. Yuan, Selective Rhodium-Catalyzed Hydroformylation of Terminal Arylalkynes and Conjugated Enynes to (Poly)enals Enabled by a  $\pi$ -acceptor Biphosphoramidite Ligand, *Org. Lett.*, 2021, **23**, 6067–6072.
- (5) R. Singh and S. K. Ghosh, A dimethylsulfonium methylide mediated highly regioselective olefination of conjugated polyolefin 1,1-dioates to conjugated polyene-2-yl-malonates and their applications in Diels–Alder reactions, *Tetrahedron*, 2010, **66**,

2284–2292.

- (6) I. Mandal, A. Mandal, M. A. Rahman and A. F. M. Kilbinger, Chain transfer agents for the catalytic ring opening metathesis polymerization of norbornenes, *Chem. Sci.*, 2022, **13**, 12469–12478.
- (7) T.-J. Hu, M.-Y. Li, Q. Zhao, C.-G. Feng and G.-Q. Lin, Highly Stereoselective Synthesis of 1,3-Dienes through an Aryl to Vinyl 1,4-Palladium Migration/Heck Sequence, *Angew. Chem. Int. Ed.*, 2018, **57**, 5871–5875.
- (8) X.-T. Wu, F. Xie, Z. Ling, L. Tang and W.-B. Zhang, Regio- and Enantioselective Copper-Catalyzed 1,4-Conjugate Addition of Trimethylaluminium to Linear  $\alpha,\beta,\gamma,\delta$ -Unsaturated Alkyl Ketones, *Adv. Synth. Catal.*, 2016, **358**, 2510–2518.
- (9) C.-Y. Li, W.-K. Lu, B. Lu, W.-F. Li, X.-M. Xie and Z.-G. Zhang, Ru-Catalyzed Chemo- and Enantioselective Hydrogenation of 2,4-Pentadien-1-ones: Synthesis of Chiral 2,4-Pentadien-1-ols, *J. Org. Chem.*, 2019, **84**, 16086–16094.
- (10) R. Katoono, H. Kawai, M. Ohkita, K. Fujiwarab and T. Suzuki, A  $C_3$ -symmetric chiroptical molecular propeller based on hexakis(phenylethynyl)benzene with a threefold terephthalamide: stereospecific propeller generation through the cooperative transmission of point chiralities on the host and guest upon complexation, *Chem. Commun.*, 2013, **49**, 10352–10354.
- (11) C. Li, Y.-L. Huang, S. Cao, Y.-H. Luo, Y. Zhang and G. Yang, A robust and facile method for desulfonation to amines, *Org. Chem. Front.*, 2021, **8**, 6182–6186.
- (12) Z.-P. Fan, X.-Y. Li, B. Sun, C.-L. Sun, Z.-F. Shi, X.-F. Shao and H.-L. Zhang, Constructing two-dimensional crossed molecular packing through branching chain engineering of amino-indenofluorene derivatives, *J. Mater. Chem. C.*, 2022, **10**, 8666–8673.
- (13) J. C. K. Chu, D. M. Dalton and T. Rovis, Zn-Catalyzed Enantio- and Diastereoselective Formal [4 + 2] Cycloaddition Involving Two Electron-Deficient Partners: Asymmetric Synthesis of Piperidines from 1-Azadienes and Nitro-Alkenes, *J. Am. Chem. Soc.*, 2015, **137**, 4445–4452.
- (14) P. Valenta, N. A. Drucker, J. W. Bode and P. J. Walsh, Simple One-pot Conversion of Aldehydes and Ketones to Enals, *Org. Lett.*, 2009, **11**, 2117–2119.

## 6. Characterization Data

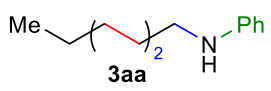 N-heptylaniline (**3aa**). Eluent: PE/EA = 100:3, brownish-yellow oil (17.6 mg, 92%).  $^1\text{H}$  NMR (400 MHz,  $\text{CDCl}_3$ )  $\delta$  7.22 – 7.14 (m, 2H), 6.73 – 6.57 (m, 3H), 3.59 (s, 1H), 3.15 – 3.06 (m, 2H), 1.68 – 1.58 (m, 2H), 1.43 – 1.26 (m, 8H), 0.94 – 0.87 (m, 3H).  $^{13}\text{C}$  NMR (100 MHz,  $\text{CDCl}_3$ )  $\delta$  148.7, 129.35, 117.2, 112.8, 44.1, 32.0, 29.7, 29.3, 27.3, 22.8, 14.2. HRMS (ESI-TOF)  $m/z$ :  $[\text{M} + \text{H}]^+$  Calcd for  $\text{C}_{13}\text{H}_{22}\text{N}^+$  192.1747, Found: 192.1745.

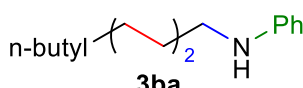 N-nonylaniline (**3ba**). Eluent: PE/EA = 100:3, yellow oil (19.5 mg, 89%).  $^1\text{H}$  NMR (400 MHz,  $\text{CDCl}_3$ )  $\delta$  7.22 – 7.14 (m, 2H), 6.70 (tt,  $J = 7.3, 1.1$  Hz, 1H), 6.64 – 6.59 (m, 2H), 3.60 (s, 1H), 3.11 (t,  $J = 7.1$  Hz, 2H), 1.67 – 1.58 (m, 2H), 1.46 – 1.27 (m, 12H), 0.90 (t,  $J = 6.7$  Hz, 3H).  $^{13}\text{C}$  NMR (100 MHz,  $\text{CDCl}_3$ )  $\delta$  148.7, 129.3, 117.2, 112.8, 44.1, 32.0, 29.73, 29.71, 29.6, 29.4, 27.3, 22.8, 14.3. HRMS (ESI-TOF)  $m/z$ :  $[\text{M} + \text{H}]^+$  Calcd for  $\text{C}_{15}\text{H}_{26}\text{N}^+$  220.2060, Found: 220.2057.

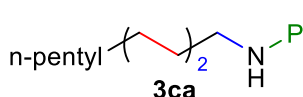 N-decylaniline (**3ca**). Eluent: PE/EA = 100:3, brownish-yellow oil (19.1 mg, 82%).  $^1\text{H}$  NMR (600 MHz,  $\text{CDCl}_3$ )  $\delta$  7.23 – 7.16 (m, 2H), 6.71 (dd,  $J = 7.8, 6.6$  Hz, 1H), 6.65 – 6.59 (m, 2H), 3.60 (s, 1H), 3.12 (t,  $J = 7.2$  Hz, 2H), 1.67 – 1.60 (m, 2H), 1.45 – 1.39 (m, 2H), 1.36 – 1.27 (m, 12H), 0.91 (t,  $J = 7.0$  Hz, 3H).  $^{13}\text{C}$  NMR (150 MHz,  $\text{CDCl}_3$ )  $\delta$  148.7, 129.3, 117.2, 112.8, 44.1, 32.0, 29.75, 29.7, 29.6, 29.5, 27.3, 22.8, 14.25. HRMS (ESI-TOF)  $m/z$ :  $[\text{M} + \text{H}]^+$  Calcd for  $\text{C}_{16}\text{H}_{28}\text{N}^+$  234.2216, Found: 234.2215.

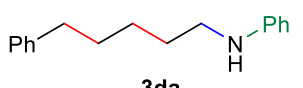 N-(5-phenylpentyl)aniline (**3da**). Eluent: PE/EA = 50:1, light yellow oil (22.2 mg, 93%).  $^1\text{H}$  NMR (400 MHz,  $\text{CDCl}_3$ )  $\delta$  7.34 – 7.25 (m, 2H), 7.24 – 7.15 (m, 5H), 6.71 (t,  $J = 7.3$  Hz, 1H), 6.61 (d,  $J = 7.9$  Hz, 2H), 3.64 (s, 1H), 3.12 (t,  $J = 7.1$  Hz, 2H), 2.65 (t,  $J = 7.7$  Hz, 2H), 1.74 – 1.59 (m, 4H), 1.52 – 1.41 (m, 2H).  $^{13}\text{C}$  NMR (100 MHz,  $\text{CDCl}_3$ )  $\delta$  148.5, 142.6, 129.4, 128.5, 128.4, 125.8, 117.3, 112.85, 44.0, 36.0, 31.4, 29.55, 26.9. HRMS (ESI-TOF)  $m/z$ :  $[\text{M}$

+ H]<sup>+</sup> Calcd for C<sub>17</sub>H<sub>22</sub>N<sup>+</sup> 240.1747, Found: 240.1746.

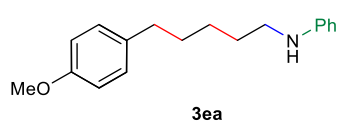

N-(5-(4-methoxyphenyl)pentyl)aniline (**3ea**). Eluent: PE/EA = 50:1, light yellow oil (22.4 mg, 83%). <sup>1</sup>H NMR (600 MHz, CDCl<sub>3</sub>) δ 7.20 – 7.17 (m, 2H), 7.13 – 7.08 (m, 2H), 6.86 – 6.83 (m, 2H), 6.73 – 6.68 (m, 1H), 6.62 – 6.58 (m, 2H), 3.80 (s, 3H), 3.65 (s, 1H), 3.11 (t, *J* = 7.1 Hz, 2H), 2.62 – 2.54 (m, 2H), 1.71 – 1.59 (m, 4H), 1.49 – 1.39 (m, 2H). <sup>13</sup>C NMR (150 MHz, CDCl<sub>3</sub>) δ 157.8, 148.5, 134.7, 129.4, 129.36, 117.3, 113.85, 113.8, 112.9, 55.4, 44.1, 35.05, 31.6, 29.5, 26.8. HRMS (ESI-TOF) *m/z*: [M + H]<sup>+</sup> Calcd for C<sub>18</sub>H<sub>24</sub>NO<sup>+</sup> 270.1852, Found: 270.1851.

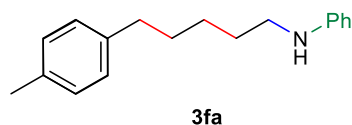

N-(5-(p-tolyl)pentyl)aniline (**3fa**). Eluent: PE/EA = 50:1, brown oil (20.3 mg, 80%). <sup>1</sup>H NMR (400 MHz, CDCl<sub>3</sub>) δ 7.22 – 7.15 (m, 2H), 7.14 – 7.07 (m, 4H), 6.74 – 6.67 (m, 1H), 6.63 – 6.58 (m, 2H), 3.59 (s, 1H), 3.12 (t, *J* = 7.1 Hz, 2H), 2.61 (t, *J* = 7.7 Hz, 2H), 2.34 (s, 3H), 1.72 – 1.59 (m, 4H), 1.52 – 1.40 (m, 2H). <sup>13</sup>C NMR (100 MHz, CDCl<sub>3</sub>) δ 148.6, 139.5, 135.25, 129.35, 129.1, 128.4, 117.2, 112.8, 44.0, 35.5, 31.5, 29.6, 26.9, 21.1. HRMS (ESI-TOF) *m/z*: [M + H]<sup>+</sup> Calcd for C<sub>18</sub>H<sub>24</sub>N<sup>+</sup> 254.1903, Found: 254.1902.

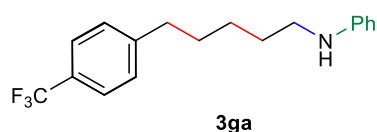

N-(5-(4-(trifluoromethyl)phenyl)pentyl)aniline (**3ga**). Eluent: PE/EA = 20:1, light brown oil (27.1 mg, 88%). <sup>1</sup>H NMR (400 MHz, CDCl<sub>3</sub>) δ 7.55 (d, *J* = 8.0 Hz, 2H), 7.29 (d, *J* = 8.0 Hz, 2H), 7.23 – 7.15 (m, 2H), 6.75 – 6.68 (m, 1H), 6.64 – 6.58 (m, 2H), 3.60 (s, 1H), 3.13 (t, *J* = 7.1 Hz, 2H), 2.70 (t, *J* = 7.7 Hz, 2H), 1.76 – 1.62 (m, 4H), 1.52 – 1.41 (m, 2H). <sup>13</sup>C NMR (100 MHz, CDCl<sub>3</sub>) δ 148.5, 146.7, 129.4, 128.8, 128.2 (q, *J* = 32.1 Hz, 1C), 125.3 (q, *J* = 3.8 Hz, 1C), 124.5 (q, *J* = 270.0 Hz, 1C), 117.3, 112.8, 43.9, 35.8, 31.1, 29.5, 26.8. <sup>19</sup>F NMR (376 MHz, CDCl<sub>3</sub>) δ -62.19. HRMS (ESI-TOF) *m/z*: [M + H]<sup>+</sup> Calcd for C<sub>18</sub>H<sub>21</sub>F<sub>3</sub>N<sup>+</sup> 308.1621, Found: 308.1621.

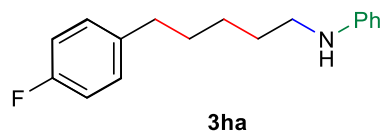

N-(5-(4-fluorophenyl)pentyl)aniline (**3ha**). Eluent: PE/EA = 50:1, yellow oil (21.9 mg, 85%). <sup>1</sup>H NMR (400 MHz, CDCl<sub>3</sub>) δ 7.23 – 7.07 (m, 4H), 7.04 – 6.90 (m, 2H), 6.71 (t, *J* = 7.3 Hz, 1H), 6.61 (d, *J* = 7.9 Hz, 2H), 3.61 (s, 1H), 3.12 (t, *J* = 7.1 Hz, 2H), 2.61 (t, *J* = 7.7 Hz, 2H), 1.66 (p, *J* = 7.6 Hz, 4H), 1.50 – 1.38 (m, 2H). <sup>13</sup>C NMR (100 MHz, CDCl<sub>3</sub>) δ 161.3 (d, *J* = 241.5 Hz, 1C), 160.1, 148.5, 138.16 (d, *J* = 3.2 Hz, 1C), 129.8 (d, *J* = 7.7 Hz, 1C), 129.4, 117.3, 115.1 (d, *J* = 20.7 Hz, 1C), 112.85, 44.0, 35.15, 31.5, 29.5, 26.8. <sup>19</sup>F NMR (376 MHz, CDCl<sub>3</sub>) δ -117.96. HRMS (ESI-TOF) *m/z*: [M + H]<sup>+</sup> Calcd for C<sub>17</sub>H<sub>21</sub>FN<sup>+</sup> 258.1653, Found: 258.1651.

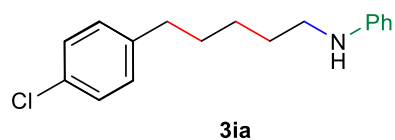

N-(5-(4-chlorophenyl)pentyl)aniline (**3ia**). Eluent: PE/EA = 50:1, light yellow oil (24.3 mg, 89%). <sup>1</sup>H NMR (400 MHz, CDCl<sub>3</sub>) δ 7.28 – 7.23 (m, 2H), 7.21 – 7.15 (m, 2H), 7.13 – 7.08 (m, 2H), 6.74 – 6.67 (m, 1H), 6.63 – 6.57 (m, 2H), 3.58 (s, 1H), 3.11 (t, *J* = 7.1 Hz, 2H), 2.63 – 2.58 (m, 2H), 1.71 – 1.59 (m, 4H), 1.49 – 1.38 (m, 2H). <sup>13</sup>C NMR (100 MHz, CDCl<sub>3</sub>) δ 148.5, 141.0, 131.5, 129.9, 129.4, 128.5, 117.3, 112.8, 44.0, 35.3, 31.3, 29.5, 26.8. HRMS (ESI-TOF) *m/z*: [M + H]<sup>+</sup> Calcd for C<sub>17</sub>H<sub>21</sub>ClN<sup>+</sup> 274.1357, Found: 274.1357.

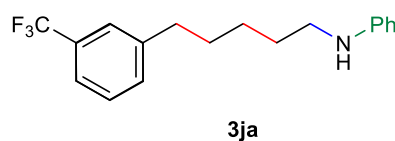

N-(5-(3-(trifluoromethyl)phenyl)pentyl)aniline (**3ja**). Eluent: PE/EA = 20:1, light yellow oil (20.0 mg, 65%). <sup>1</sup>H NMR (400 MHz, CDCl<sub>3</sub>) δ 7.48 – 7.33 (m, 4H), 7.22 – 7.15 (m, 2H), 6.74 – 6.67 (m, 1H), 6.64 – 6.57 (m, 2H), 3.61 (s, 1H), 3.12 (t, *J* = 7.1 Hz, 2H), 2.75 – 2.64 (m, 2H), 1.75 – 1.61 (m, 4H), 1.53 – 1.40 (m, 2H). <sup>13</sup>C NMR (100 MHz, CDCl<sub>3</sub>) δ 148.5, 143.4, 131.9, 130.7 (q, *J* = 31.8 Hz, 1C), 129.4, 128.8, 125.2 (q, *J* = 3.7 Hz, 1C), 124.4 (q, *J* = 270.4 Hz, 1C), 122.8 (q, *J* = 4.0 Hz, 1C), 117.3, 112.8, 43.9, 35.8, 31.2, 29.5, 26.9. <sup>19</sup>F NMR (376 MHz, CDCl<sub>3</sub>) δ -62.48. HRMS (ESI-TOF) *m/z*: [M + H]<sup>+</sup> Calcd for C<sub>18</sub>H<sub>21</sub>F<sub>3</sub>N<sup>+</sup> 308.1621, Found: 308.1618.

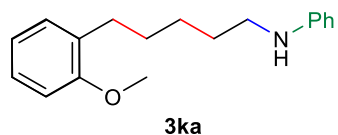

N-(5-(2-methoxyphenyl)pentyl)aniline (**3ka**). Eluent: PE/EA = 50:1, light yellow oil (18.1 mg, 67%).  $^1\text{H}$  NMR (400 MHz,  $\text{CDCl}_3$ )  $\delta$  7.24 – 7.10 (m, 4H), 6.95 – 6.83 (m, 2H), 6.70 (tt,  $J = 7.3, 1.1$  Hz, 1H), 6.65 – 6.57 (m, 2H), 3.84 (s, 3H), 3.60 (s, 1H), 3.13 (t,  $J = 7.1$  Hz, 2H), 2.68 – 2.62 (m, 2H), 1.73 – 1.60 (m, 4H), 1.52 – 1.43 (m, 2H).  $^{13}\text{C}$  NMR (100 MHz,  $\text{CDCl}_3$ )  $\delta$  157.55, 148.6, 131.0, 129.9, 129.3, 127.0, 120.5, 117.2, 112.8, 110.4, 55.4, 44.05, 30.2, 29.7, 29.6, 27.2. HRMS (ESI-TOF)  $m/z$ :  $[\text{M} + \text{H}]^+$  Calcd for  $\text{C}_{18}\text{H}_{24}\text{NO}^+$  270.1852, Found: 270.1852.

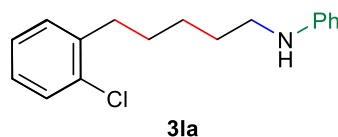

N-(5-(2-chlorophenyl)pentyl)aniline (**3la**). Eluent: PE/EA = 50:1, brown oil (19.6 mg, 72%).  $^1\text{H}$  NMR (400 MHz,  $\text{CDCl}_3$ )  $\delta$  7.38 – 7.33 (m, 1H), 7.24 – 7.11 (m, 5H), 6.74 – 6.67 (m, 1H), 6.64 – 6.58 (m, 2H), 3.61 (s, 1H), 3.18 – 3.08 (m, 2H), 2.82 – 2.72 (m, 2H), 1.77 – 1.61 (m, 4H), 1.56 – 1.43 (m, 2H).  $^{13}\text{C}$  NMR (100 MHz,  $\text{CDCl}_3$ )  $\delta$  148.6, 140.15, 134.0, 130.5, 129.6, 129.4, 127.3, 126.8, 117.25, 112.8, 44.0, 33.65, 29.7, 29.5, 27.0. HRMS (ESI-TOF)  $m/z$ :  $[\text{M} + \text{H}]^+$  Calcd for  $\text{C}_{17}\text{H}_{21}\text{ClN}^+$  274.1357, Found: 274.1357.

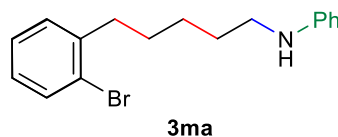

N-(5-(2-bromophenyl)pentyl)aniline (**3ma**). Eluent: PE/EA = 50:1, brown oil (19.8 mg, 62%).  $^1\text{H}$  NMR (400 MHz,  $\text{CDCl}_3$ )  $\delta$  7.53 (dd,  $J = 7.9, 1.1$  Hz, 1H), 7.24 – 7.14 (m, 4H), 7.09 – 7.02 (m, 1H), 6.73 – 6.66 (m, 1H), 6.63 – 6.58 (m, 2H), 3.65 (s, 1H), 3.13 (t,  $J = 7.1$  Hz, 2H), 2.79 – 2.71 (m, 2H), 1.72 – 1.62 (m, 4H), 1.53 – 1.44 (m, 2H).  $^{13}\text{C}$  NMR (100 MHz,  $\text{CDCl}_3$ )  $\delta$  148.5, 141.8, 132.9, 130.45, 129.4, 127.6, 127.5, 124.5, 117.3, 112.8, 44.0, 36.2, 29.85, 29.5, 27.0. HRMS (ESI-TOF)  $m/z$ :  $[\text{M} + \text{H}]^+$  Calcd for  $\text{C}_{17}\text{H}_{21}\text{BrN}^+$  318.0852, Found: 318.0852.

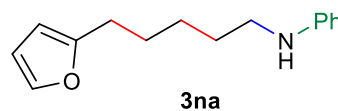

N-(5-(furan-2-yl)pentyl)aniline (**3na**). Eluent: PE/EA = 50:1, light yellow oil (16.1 mg, 70%).  $^1\text{H}$  NMR (400 MHz,  $\text{CDCl}_3$ )  $\delta$  7.33 (dd,  $J = 1.9, 0.9$  Hz, 1H), 7.23 – 7.15 (m, 2H), 6.71 (tt,  $J = 7.4, 1.1$  Hz,

1H), 6.65 – 6.59 (m, 2H), 6.31 (dd,  $J = 3.2, 1.9$  Hz, 1H), 6.03 – 5.97 (m, 1H), 3.58 (s, 1H), 3.13 (t,  $J = 7.1$  Hz, 2H), 2.67 (t,  $J = 7.8$  Hz, 2H), 1.78 – 1.61 (m, 4H), 1.53 – 1.42 (m, 2H).  $^{13}\text{C}$  NMR (100 MHz,  $\text{CDCl}_3$ )  $\delta$  156.3, 148.6, 140.9, 129.3, 117.25, 112.8, 110.2, 104.9, 44.0, 29.4, 28.0, 27.98, 26.8. HRMS (ESI-TOF)  $m/z$ :  $[\text{M} + \text{H}]^+$  Calcd for  $\text{C}_{15}\text{H}_{20}\text{NO}^+$  230.1539, Found: 230.1539.

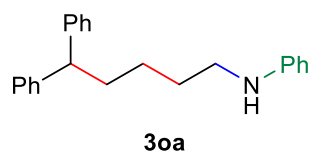

N-(5,5-diphenylpentyl)aniline (**3oa**). Eluent: PE/EA = 50:1, light yellow oil (26.5 mg, 84%).  $^1\text{H}$  NMR (400 MHz,  $\text{CDCl}_3$ )  $\delta$  7.31 – 7.26 (m, 4H), 7.26 – 7.22 (m, 4H), 7.21 – 7.13 (m, 4H), 6.72 – 6.65 (m, 1H), 6.59 – 6.54 (m, 2H), 3.91 (t,  $J = 7.8$  Hz, 1H), 3.58 (s, 1H), 3.12 – 3.02 (m, 2H), 2.15 – 2.03 (m, 2H), 1.71 – 1.60 (m, 2H), 1.44 – 1.33 (m, 2H).  $^{13}\text{C}$  NMR (100 MHz,  $\text{CDCl}_3$ )  $\delta$  148.5, 145.1, 129.35, 128.7, 128.6, 128.0, 127.9, 126.3, 117.3, 112.9, 51.4, 43.9, 35.6, 29.6, 25.7. HRMS (ESI-TOF)  $m/z$ :  $[\text{M} + \text{H}]^+$  Calcd for  $\text{C}_{23}\text{H}_{26}\text{N}^+$  316.2060, Found: 316.2059.

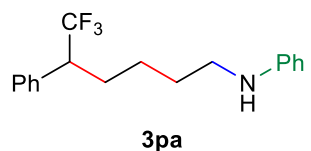

N-(6,6,6-trifluoro-5-phenylhexyl)aniline (**3pa**). Eluent: PE/EA = 20:1, yellow oil (20.3 mg, 66%).  $^1\text{H}$  NMR (400 MHz,  $\text{CDCl}_3$ )  $\delta$  7.42 – 7.31 (m, 3H), 7.31 – 7.21 (m, 2H), 7.19 – 7.11 (m, 2H), 6.72 – 6.66 (m, 1H), 6.58 – 6.49 (m, 2H), 3.50 (s, 1H), 3.30 – 3.16 (m, 1H), 3.12 – 2.98 (m, 2H), 2.16 – 1.99 (m, 1H), 1.99 – 1.85 (m, 1H), 1.76 – 1.50 (m, 2H), 1.37 – 1.21 (m, 2H).  $^{13}\text{C}$  NMR (100 MHz,  $\text{CDCl}_3$ )  $\delta$  148.3, 134.8 (q,  $J = 1.7$  Hz, 1C), 129.4, 129.1, 128.9, 128.3, 117.4, 112.8, 50.2 (q,  $J = 26.0$  Hz, 1C), 43.7, 29.3, 28.6, 24.5.  $^{19}\text{F}$  NMR (376 MHz,  $\text{CDCl}_3$ )  $\delta$  -69.74. HRMS (ESI-TOF)  $m/z$ :  $[\text{M} + \text{H}]^+$  Calcd for  $\text{C}_{18}\text{H}_{21}\text{F}_3\text{N}^+$  308.1621, Found: 308.1621.

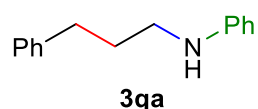

N-(3-phenylpropyl)aniline (**3qa**). Eluent: PE/EA = 20:1, yellow oil (20.0 mg, 95%).  $^1\text{H}$  NMR (400 MHz,  $\text{CDCl}_3$ )  $\delta$  7.31 (t,  $J = 7.6$  Hz, 2H), 7.25 – 7.15 (m, 5H), 6.71 (t,  $J = 7.3$  Hz, 1H), 6.60 (d,  $J = 7.9$  Hz, 2H), 3.61 (s, 1H), 3.17 (t,  $J = 7.0$  Hz, 2H), 2.76 (t,  $J = 7.6$  Hz, 2H), 2.03 – 1.92 (m, 2H).  $^{13}\text{C}$  NMR (100 MHz,  $\text{CDCl}_3$ )  $\delta$  148.5, 141.8, 129.4, 128.6, 128.5, 126.1, 117.3, 112.9,



43.55, 33.5, 31.2. HRMS (ESI-TOF)  $m/z$ :  $[M + H]^+$  Calcd for  $C_{15}H_{18}N^+$  212.1434, Found: 212.1431.

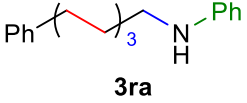  
**3ra** N-(7-phenylheptyl)aniline (**3ra**). Eluent: PE/EA = 50:2, brownish-yellow oil (18.0 mg, 67%).  $^1H$  NMR (400 MHz,  $CDCl_3$ )  $\delta$  7.33 – 7.27 (m, 2H), 7.23 – 7.16 (m, 5H), 6.71 (tt,  $J = 7.3, 1.1$  Hz, 1H), 6.64 – 6.59 (m, 2H), 3.57 (s, 1H), 3.11 (t,  $J = 7.1$  Hz, 2H), 2.63 (t,  $J = 7.7$  Hz, 2H), 1.69 – 1.60 (m, 4H), 1.46 – 1.35 (m, 6H).  $^{13}C$  NMR (100 MHz,  $CDCl_3$ )  $\delta$  148.6, 142.9, 129.3, 128.5, 128.4, 125.7, 117.2, 112.8, 44.1, 36.1, 31.6, 29.7, 29.4, 29.3, 27.2. HRMS (ESI-TOF)  $m/z$ :  $[M + H]^+$  Calcd for  $C_{19}H_{26}N^+$  268.2060, Found: 268.2059.

  
**3sa** N-(9-phenylnonyl)aniline (**3sa**). Eluent: PE/EA = 100:3, light yellow oil (18.9 mg, 64%).  $^1H$  NMR (400 MHz,  $CDCl_3$ )  $\delta$  7.32 – 7.26 (m, 2H), 7.22 – 7.14 (m, 5H), 6.72 – 6.66 (m, 1H), 6.64 – 6.58 (m, 2H), 3.59 (s, 1H), 3.11 (t,  $J = 7.1$  Hz, 2H), 2.62 (t,  $J = 7.7$  Hz, 2H), 1.67 – 1.56 (m, 4H), 1.45 – 1.27 (m, 10H).  $^{13}C$  NMR (100 MHz,  $CDCl_3$ )  $\delta$  148.7, 143.0, 129.35, 128.5, 128.4, 125.7, 117.2, 112.8, 44.1, 36.1, 31.6, 29.7, 29.65, 29.6, 29.5, 29.4, 27.3. HRMS (ESI-TOF)  $m/z$ :  $[M + H]^+$  Calcd for  $C_{21}H_{30}N^+$  296.2373, Found: 296.2372.

  
**3ta** N-(11-phenylundecyl)aniline (**3ta**). Eluent: PE/EA = 50:1, light yellow oil (4.5 mg, 14%).  $^1H$  NMR (400 MHz,  $CDCl_3$ )  $\delta$  7.30 – 7.25 (m, 2H), 7.20 – 7.13 (m, 5H), 6.71 – 6.65 (m, 1H), 6.63 – 6.57 (m, 2H), 3.70 (s, 1H), 3.10 (t,  $J = 7.1$  Hz, 2H), 2.63 – 2.56 (m, 2H), 1.65 – 1.58 (m, 5H), 1.43 – 1.26 (m, 13H).  $^{13}C$  NMR (100 MHz,  $CDCl_3$ )  $\delta$  148.65, 143.1, 129.4, 128.5, 128.4, 125.7, 117.25, 112.9, 44.2, 36.1, 31.7, 29.7, 29.7, 29.65, 29.6, 29.5, 27.3. HRMS (ESI-TOF)  $m/z$ :  $[M + H]^+$  Calcd for  $C_{23}H_{34}N^+$  324.2686, Found: 324.2682.

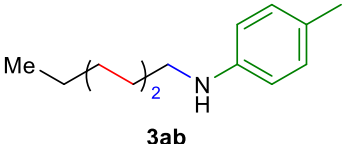  
**3ab** N-heptyl-4-methylaniline (**3ab**). Eluent: PE/EA = 100:1, brownish-yellow oil (18.5 mg, 90%).  $^1H$  NMR (400

MHz, CDCl<sub>3</sub>)  $\delta$  7.00 (d,  $J = 7.9$  Hz, 2H), 6.61 – 6.50 (m, 2H), 3.46 (s, 1H), 3.09 (t,  $J = 7.2$  Hz, 2H), 2.25 (s, 3H), 1.67 – 1.56 (m, 2H), 1.45 – 1.25 (m, 8H), 0.95 – 0.86 (m, 3H). <sup>13</sup>C NMR (100 MHz, CDCl<sub>3</sub>)  $\delta$  146.5, 129.8, 126.4, 113.0, 44.5, 32.0, 29.8, 29.3, 27.3, 22.8, 20.5, 14.2. HRMS (ESI-TOF)  $m/z$ : [M + H]<sup>+</sup> Calcd for C<sub>14</sub>H<sub>24</sub>N<sup>+</sup> 206.1903, Found: 206.1901.

 N-heptyl-4-methoxyaniline (**3ac**). Eluent: PE/EA = 50:2, yellow oil (14.2 mg, 64%). <sup>1</sup>H NMR (400 MHz, CDCl<sub>3</sub>)  $\delta$  6.84 – 6.73 (m, 2H), 6.64 – 6.53 (m, 2H), 3.75 (s, 3H), 3.32 (s, 1H), 3.06 (t,  $J = 7.1$  Hz, 2H), 1.68 – 1.54 (m, 2H), 1.47 – 1.21 (m, 8H), 0.96 – 0.83 (m, 3H). <sup>13</sup>C NMR (100 MHz, CDCl<sub>3</sub>)  $\delta$  152.1, 143.0, 115.0, 114.1, 55.95, 45.2, 31.95, 29.8, 29.3, 27.3, 22.8, 14.2. HRMS (ESI-TOF)  $m/z$ : [M + H]<sup>+</sup> Calcd for C<sub>14</sub>H<sub>24</sub>NO<sup>+</sup> 222.1852, Found: 222.1849.

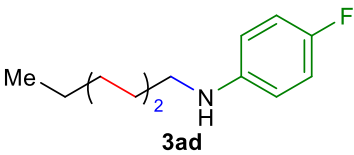 4-fluoro-N-heptylaniline (**3ad**). Eluent: PE/EA = 100:1, yellow oil (17.1 mg, 82%). <sup>1</sup>H NMR (400 MHz, CDCl<sub>3</sub>)  $\delta$  6.93 – 6.84 (m, 2H), 6.57 – 6.49 (m, 2H), 3.47 (s, 1H), 3.06 (t,  $J = 7.1$  Hz, 2H), 1.65 – 1.56 (m, 2H), 1.44 – 1.24 (m, 8H), 0.94 – 0.86 (m, 3H). <sup>13</sup>C NMR (100 MHz, CDCl<sub>3</sub>)  $\delta$  155.8 (d,  $J = 232.8$  Hz, 1C), 145.1 (d,  $J = 1.9$  Hz, 1C), 115.7 (d,  $J = 22.3$  Hz, 2C), 113.6 (d,  $J = 7.3$  Hz, 2C), 44.9, 31.95, 29.7, 29.3, 27.3, 22.8, 14.2. <sup>19</sup>F NMR (376 MHz, CDCl<sub>3</sub>)  $\delta$  -128.60. HRMS (ESI-TOF)  $m/z$ : [M + H]<sup>+</sup> Calcd for C<sub>13</sub>H<sub>21</sub>FN<sup>+</sup> 210.1653, Found: 210.1651.

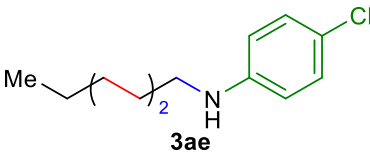 4-chloro-N-heptylaniline (**3ae**). Eluent: PE/EA = 100:1, light yellow oil (16.9 mg, 75%). <sup>1</sup>H NMR (400 MHz, CDCl<sub>3</sub>)  $\delta$  7.11 (d,  $J = 8.7$  Hz, 2H), 6.51 (d,  $J = 8.7$  Hz, 2H), 3.60 (s, 1H), 3.07 (t,  $J = 7.3$  Hz, 2H), 1.66 – 1.54 (m, 2H), 1.44 – 1.25 (m, 8H), 0.94 – 0.84 (m, 3H). <sup>13</sup>C NMR (100 MHz, CDCl<sub>3</sub>)  $\delta$  147.2, 129.1, 121.65, 113.8, 44.2, 31.9, 29.6, 29.2, 27.2, 22.75, 14.2. HRMS (ESI-TOF)  $m/z$ : [M + H]<sup>+</sup> Calcd for C<sub>13</sub>H<sub>21</sub>ClN<sup>+</sup> 226.1357, Found: 226.1355.

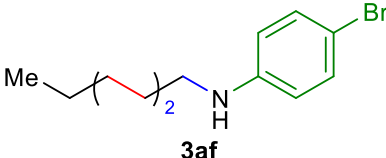
**3af** 4-bromo-N-heptylaniline (**3af**). Eluent: PE/EA = 50:1, light yellow oil (15.4 mg, 57%). <sup>1</sup>H NMR (400 MHz, CDCl<sub>3</sub>) δ 7.26 – 7.21 (m, 2H), 6.50 – 6.44 (m, 2H), 3.62 (s, 1H), 3.06 (t, *J* = 7.1 Hz, 2H), 1.64 – 1.57 (m, 2H), 1.42 – 1.27 (m, 8H), 0.92 – 0.86 (m, 3H). <sup>13</sup>C NMR (100 MHz, CDCl<sub>3</sub>) δ 147.6, 132.0, 114.3, 108.65, 44.1, 31.9, 29.55, 29.2, 27.2, 22.8, 14.2. HRMS (ESI-TOF) *m/z*: [M + H]<sup>+</sup> Calcd for C<sub>13</sub>H<sub>21</sub>BrN<sup>+</sup> 270.0852, Found: 270.0852.

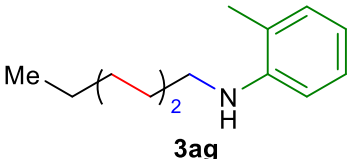
**3ag** N-heptyl-2-methylaniline (**3ag**). Eluent: PE/EA = 100:1, yellow oil (14.4 mg, 70%). <sup>1</sup>H NMR (400 MHz, CDCl<sub>3</sub>) δ 7.19 – 7.02 (m, 2H), 6.75 – 6.54 (m, 2H), 3.48 (s, 1H), 3.17 (t, *J* = 7.2 Hz, 2H), 2.15 (s, 3H), 1.73 – 1.63 (m, 2H), 1.47 – 1.27 (m, 8H), 0.98 – 0.82 (m, 3H). <sup>13</sup>C NMR (100 MHz, CDCl<sub>3</sub>) δ 146.5, 130.1, 127.3, 121.8, 116.75, 109.8, 44.1, 32.0, 29.8, 29.3, 27.4, 22.8, 17.6, 14.2. HRMS (ESI-TOF) *m/z*: [M + H]<sup>+</sup> Calcd for C<sub>14</sub>H<sub>24</sub>N<sup>+</sup> 206.1903, Found: 206.1902.

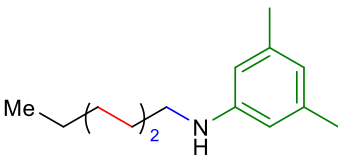
**3ah** N-heptyl-3,5-dimethylaniline (**3ah**). Eluent: PE/EA = 100:1, yellow oil (17.1 mg, 78%). <sup>1</sup>H NMR (400 MHz, CDCl<sub>3</sub>) δ 6.38 (s, 1H), 6.27 (s, 2H), 3.51 (s, 1H), 3.10 (t, *J* = 7.1 Hz, 2H), 2.26 (s, 6H), 1.69 – 1.56 (m, 2H), 1.50 – 1.23 (m, 8H), 0.97 – 0.87 (m, 3H). <sup>13</sup>C NMR (100 MHz, CDCl<sub>3</sub>) δ 148.8, 138.95, 119.2, 110.8, 44.2, 32.0, 29.8, 29.3, 27.3, 22.8, 21.6, 14.2. HRMS (ESI-TOF) *m/z*: [M + H]<sup>+</sup> Calcd for C<sub>15</sub>H<sub>26</sub>N<sup>+</sup> 220.2060, Found: 220.2059.

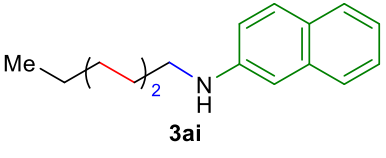
**3ai** N-heptylnaphthalen-2-amine (**3ai**). Eluent: PE/EA = 100:1, yellow oil (12.1 mg, 50%). <sup>1</sup>H NMR (400 MHz, CDCl<sub>3</sub>) δ 7.65 (dd, *J* = 19.2, 8.3 Hz, 3H), 7.36 (t, *J* = 7.6 Hz, 1H), 7.19 (t, *J* = 7.5 Hz, 1H), 6.88 (dd, *J* = 8.7, 2.5 Hz, 1H), 6.81 (s, 1H), 3.78 (s, 1H), 3.22 (t, *J* = 7.1 Hz, 2H), 1.74 – 1.65 (m, 2H), 1.50 – 1.27 (m, 8H), 0.96 – 0.88 (m, 3H). <sup>13</sup>C NMR (100 MHz, CDCl<sub>3</sub>) δ 146.3, 135.4, 129.0, 127.8, 127.5, 126.4,

126.0, 121.9, 118.1, 104.3, 44.2, 32.0, 29.6, 29.3, 27.35, 22.8, 14.2. HRMS (ESI-TOF)  $m/z$ :  $[M + H]^+$  Calcd for  $C_{17}H_{24}N^+$  242.1903, Found: 242.1903.

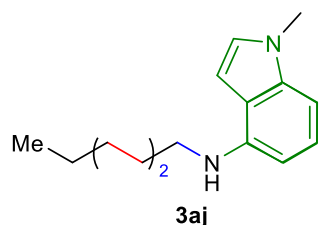

N-heptyl-1-methyl-1H-indol-4-amine (**3aj**). Eluent: PE/EA = 20:1, light yellow oil (9.7 mg, 40%).  $^1H$  NMR (400 MHz,  $CDCl_3$ )  $\delta$  7.15 – 7.09 (m, 1H), 6.93 (d,  $J = 3.2$  Hz, 1H), 6.77 – 6.71 (m, 1H), 6.39 – 6.35 (m, 1H), 6.29 (d,  $J = 7.6$  Hz, 1H), 3.90 (s, 1H), 3.75 (s, 3H), 3.27 (t,  $J = 7.2$  Hz, 2H), 1.78 – 1.66 (m, 2H), 1.50 – 1.24 (m, 8H), 0.94 – 0.86 (m, 3H).  $^{13}C$  NMR (100 MHz,  $CDCl_3$ )  $\delta$  141.9, 137.4, 126.5, 123.2, 99.4, 99.1, 96.9, 44.20, 33.2, 32.0, 29.8, 29.3, 27.4, 22.8, 14.3. HRMS (ESI-TOF)  $m/z$ :  $[M + H]^+$  Calcd for  $C_{16}H_{25}N_2^+$  245.2012, Found: 245.2012.

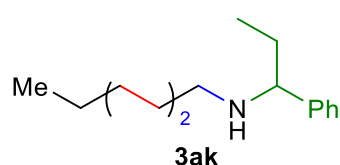

N-(1-phenylpropyl)heptan-1-amine (**3ak**). Eluent: PE/EA = 6:1, colorless oil (12.5 mg, 54%).  $^1H$  NMR (400 MHz,  $CDCl_3$ )  $\delta$  7.39 – 7.21 (m, 5H), 3.56 – 3.42 (m, 1H), 2.53 – 2.37 (m, 2H), 1.85 – 1.73 (m, 1H), 1.72 – 1.59 (m, 1H), 1.56 – 1.37 (m, 3H), 1.27 (s, 8H), 0.86 (dt,  $J = 26.1, 6.9$  Hz, 6H).  $^{13}C$  NMR (100 MHz,  $CDCl_3$ )  $\delta$  144.5, 128.4, 127.45, 126.9, 65.4, 48.0, 32.0, 31.1, 30.4, 29.4, 27.5, 22.75, 14.2, 11.0. HRMS (ESI-TOF)  $m/z$ :  $[M + H]^+$  Calcd for  $C_{16}H_{28}N^+$  234.2216, Found: 234.2212.

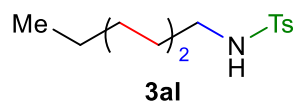

N-heptyl-4-methylbenzenesulfonamide (**3al**). Eluent: PE/EA = 5:1, colorless oil (9.0 mg, 33%).  $^1H$  NMR (400 MHz,  $CDCl_3$ )  $\delta$  7.74 (d,  $J = 8.4$  Hz, 2H), 7.31 (d,  $J = 8.4$  Hz, 2H), 4.34 (t,  $J = 6.3$  Hz, 1H), 2.96 – 2.88 (m, 2H), 2.43 (s, 3H), 1.53 – 1.10 (m, 10H), 0.85 (t,  $J = 7.1$  Hz, 3H).  $^{13}C$  NMR (100 MHz,  $CDCl_3$ )  $\delta$  143.5, 137.0, 129.8, 127.2, 43.4, 31.8, 29.7, 28.9, 26.6, 22.7, 21.7, 14.2. HRMS (ESI-TOF)  $m/z$ :  $[M + H]^+$  Calcd for  $C_{14}H_{24}NO_2S^+$  270.1522, Found: 270.1522.

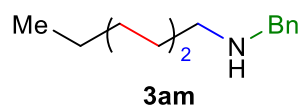

N-benzylheptan-1-amine (**3am**). Eluent: PE/EA = 15:1, yellow oil (6.2 mg, 30%).  $^1\text{H}$  NMR (400 MHz,  $\text{CDCl}_3$ )  $\delta$

7.36 – 7.27 (m, 4H), 7.25 – 7.19 (m, 1H), 3.99 (d,  $J = 13.5$  Hz, 1H), 3.20 (d,  $J = 13.5$  Hz, 1H), 2.81 – 2.69 (m, 1H), 2.27 – 2.15 (m, 1H), 2.07 – 1.93 (m, 1H), 1.70 – 1.56 (m, 5H), 1.49 – 1.42 (m, 2H), 1.34 – 1.23 (m, 3H), 0.92 (t,  $J = 7.5$  Hz, 3H).  $^{13}\text{C}$  NMR (100 MHz,  $\text{CDCl}_3$ )  $\delta$  129.1, 128.2, 126.7, 62.0, 57.7, 52.1, 29.9, 25.5, 24.6, 24.0, 9.7. HRMS (ESI-TOF)  $m/z$ :  $[\text{M} + \text{H}]^+$  Calcd for  $\text{C}_{14}\text{H}_{24}\text{N}^+$  206.1903, Found: 206.1901.

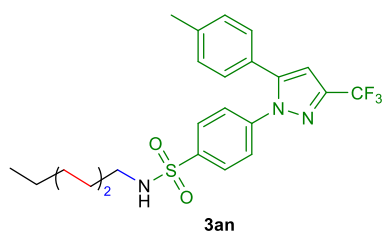

N-heptyl-4-(5-(p-tolyl)-3-(trifluoromethyl)-1H-pyrazol-1-yl)benzenesulfonamide (**3an**). Eluent:

PE/EA = 10:1, light yellow oil (14.9 mg, 31%).  $^1\text{H}$  NMR (400 MHz,  $\text{CDCl}_3$ )  $\delta$  7.87 – 7.82 (m, 2H), 7.50 – 7.44 (m, 2H), 7.17 (d,  $J = 7.9$  Hz, 2H), 7.10 (d,  $J = 8.2$  Hz, 2H), 6.74 (s, 1H), 4.47 (t,  $J = 6.2$  Hz, 1H), 2.94 (q,  $J = 6.8$  Hz, 2H), 2.38 (s, 3H), 1.61 (s, 1H), 1.51 – 1.39 (m, 2H), 1.33 – 1.16 (m, 7H), 0.86 (t,  $J = 6.9$  Hz, 3H).  $^{13}\text{C}$  NMR (100 MHz,  $\text{CDCl}_3$ )  $\delta$  145.4, 142.6, 139.9, 139.7, 129.9, 128.8, 128.2, 125.8, 125.7, 106.4, 43.5, 31.8, 29.7, 28.85, 26.6, 22.65, 21.5, 14.15.  $^{19}\text{F}$  NMR (376 MHz,  $\text{CDCl}_3$ )  $\delta$  -62.46. HRMS (ESI-TOF)  $m/z$ :  $[\text{M} + \text{Na}]^+$  Calcd for  $\text{C}_{24}\text{H}_{28}\text{F}_3\text{N}_3\text{NaO}_2\text{S}^+$  502.1747, Found: 502.1755.

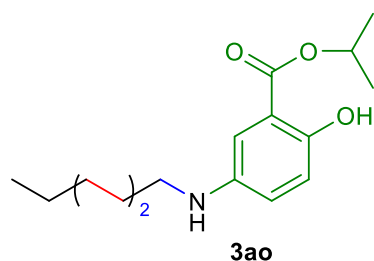

Isopropyl 5-(heptylamino)-2-hydroxybenzoate (**3ao**). Eluent: PE/EA = 20:1, yellow oil (15.8 mg, 54%).  $^1\text{H}$

NMR (400 MHz,  $\text{CDCl}_3$ )  $\delta$  10.34 (s, 1H), 7.04 (dd,  $J = 2.4, 1.0$  Hz, 1H), 6.86 – 6.79 (m, 2H), 5.27 (hept,  $J = 6.2$  Hz, 1H), 3.06 (t,  $J = 7.1$  Hz, 2H), 1.66 – 1.55 (m, 2H), 1.44 – 1.23 (m, 14H), 0.94 – 0.83 (m, 3H).  $^{13}\text{C}$  NMR (100 MHz,  $\text{CDCl}_3$ )  $\delta$  169.9, 154.3, 141.2, 122.4, 118.15, 112.9, 112.1, 69.1, 45.2, 31.9, 29.7, 29.3, 27.3, 22.75, 22.0, 14.2. HRMS (ESI-TOF)  $m/z$ :  $[\text{M} + \text{H}]^+$  Calcd for  $\text{C}_{17}\text{H}_{28}\text{NO}_3^+$  294.2064, Found: 294.2060.

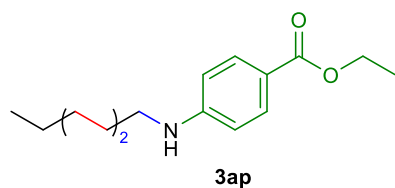

Ethyl 4-(heptylamino)benzoate (**3ap**). Eluent: PE/EA = 20:1, light yellow solid (7.1 mg, 27%, m.p. 67 – 69 °C). <sup>1</sup>H NMR (400 MHz, CDCl<sub>3</sub>) δ 7.90 – 7.81 (m, 2H), 6.57 – 6.49 (m, 2H), 4.31 (q, *J* = 7.1 Hz, 2H), 4.11 (s, 1H), 3.15 (t, *J* = 7.2 Hz, 2H), 1.65 – 1.59 (m, 2H), 1.42 – 1.26 (m, 11H), 0.92 – 0.85 (m, 3H). <sup>13</sup>C NMR (100 MHz, CDCl<sub>3</sub>) δ 167.1, 152.2, 131.6, 118.4, 111.4, 60.3, 43.5, 31.9, 29.45, 29.2, 27.2, 22.75, 14.6, 14.2. HRMS (ESI-TOF) *m/z*: [M + Na]<sup>+</sup> Calcd for C<sub>16</sub>H<sub>25</sub>NNaO<sub>2</sub><sup>+</sup> 286.1778, Found: 286.1781.

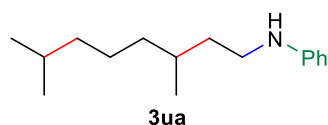

N-(3,7-dimethyloctyl)aniline (**3ua**). Eluent: PE/EA = 100:3, light yellow oil (11.9 mg, 51%). <sup>1</sup>H NMR (400 MHz, CDCl<sub>3</sub>) δ 7.20 – 7.14 (m, 2H), 6.71 – 6.66 (m, 1H), 6.63 – 6.58 (m, 2H), 3.54 (s, 1H), 3.20 – 3.05 (m, 2H), 1.69 – 1.59 (m, 1H), 1.55 – 1.39 (m, 3H), 1.36 – 1.23 (m, 3H), 1.21 – 1.09 (m, 3H), 0.93 (d, *J* = 6.5 Hz, 3H), 0.87 (d, *J* = 6.6 Hz, 6H). <sup>13</sup>C NMR (100 MHz, CDCl<sub>3</sub>) δ 148.7, 129.35, 117.2, 112.8, 42.1, 39.4, 37.4, 36.95, 31.0, 28.1, 24.9, 22.9, 22.8, 19.9. HRMS (ESI-TOF) *m/z*: [M + H]<sup>+</sup> Calcd for C<sub>16</sub>H<sub>28</sub>N<sup>+</sup> 234.2216, Found: 234.2218.

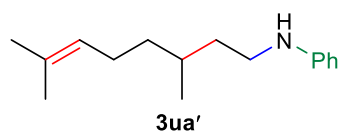

N-(3,7-dimethyloct-6-en-1-yl)aniline (**3ua'**). Eluent: PE/EA = 100:3, light yellow oil (8.3 mg, 36%). <sup>1</sup>H NMR (400 MHz, CDCl<sub>3</sub>) δ 7.21 – 7.13 (m, 2H), 6.72 – 6.65 (m, 1H), 6.64 – 6.57 (m, 2H), 5.15 – 5.04 (m, 1H), 3.56 (s, 1H), 3.19 – 3.04 (m, 2H), 2.10 – 1.91 (m, 2H), 1.73 – 1.58 (m, 7H), 1.50 – 1.30 (m, 3H), 1.25 – 1.16 (m, 1H), 0.95 (d, *J* = 6.6 Hz, 3H). <sup>13</sup>C NMR (100 MHz, CDCl<sub>3</sub>) δ 148.7, 131.5, 129.4, 124.8, 117.2, 112.8, 42.1, 37.2, 36.9, 30.6, 25.9, 25.6, 19.75, 17.8. HRMS (ESI-TOF) *m/z*: [M + H]<sup>+</sup> Calcd for C<sub>16</sub>H<sub>26</sub>N<sup>+</sup> 232.2060, Found: 232.2060.

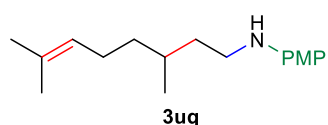

N-(3,7-dimethyloct-6-en-1-yl)-4-methoxyaniline (**3uq**). Eluent: PE/EA = 50:1, light yellow oil (24.1 mg, 92%). <sup>1</sup>H NMR (400 MHz, CDCl<sub>3</sub>) δ 6.81 – 6.76 (m, 2H), 6.62 –

6.56 (m, 2H), 5.16 – 5.06 (m, 1H), 3.75 (s, 3H), 3.15 – 3.00 (m, 2H), 2.10 – 1.88 (m, 2H), 1.73 – 1.68 (m, 3H), 1.68 – 1.50 (m, 5H), 1.48 – 1.33 (m, 2H), 1.27 – 1.14 (m, 1H), 0.99 – 0.84 (m, 4H). <sup>13</sup>C NMR (100 MHz, CDCl<sub>3</sub>) δ 152.1, 143.0, 131.4, 124.8, 115.0, 114.2, 56.0, 43.1, 37.25, 37.0, 30.6, 25.9, 25.6, 19.75, 17.8. HRMS (ESI-TOF) m/z: [M + H]<sup>+</sup> Calcd for C<sub>17</sub>H<sub>28</sub>NO<sup>+</sup> 262.2165, Found: 262.2161.

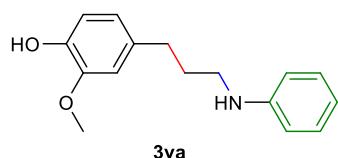

2-methoxy-4-(3-(phenylamino)propyl)phenol (**3va**).

Eluent: PE/EA = 5:1, light yellow oil (13.4 mg, 52%). <sup>1</sup>H NMR (400 MHz, CDCl<sub>3</sub>) δ 7.21 – 7.13 (m, 2H), 6.88 –

6.82 (m, 1H), 6.73 – 6.66 (m, 3H), 6.62 – 6.55 (m, 2H), 3.86 (s, 3H), 3.15 (t, *J* = 7.0 Hz, 2H), 2.68 (t, *J* = 7.6 Hz, 2H), 1.99 – 1.87 (m, 2H). <sup>13</sup>C NMR (100 MHz, CDCl<sub>3</sub>) δ 148.5, 146.5, 143.9, 133.7, 129.4, 121.1, 117.35, 114.4, 112.9, 111.1, 56.0, 43.5, 33.2, 31.4. HRMS (ESI-TOF) m/z: [M + H]<sup>+</sup> Calcd for C<sub>16</sub>H<sub>20</sub>NO<sub>2</sub><sup>+</sup> 258.1489, Found: 258.1493.

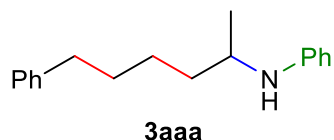

N-(6-phenylhexan-2-yl)aniline (**3aaa**). Eluent: PE/EA = 100:3, light yellow oil (6.4 mg, 25%). <sup>1</sup>H NMR (400 MHz, CDCl<sub>3</sub>) δ 7.32 – 7.26 (m, 2H), 7.22 – 7.12 (m, 5H), 6.66

(tt, *J* = 7.3, 1.1 Hz, 1H), 6.60 – 6.54 (m, 2H), 3.56 – 3.25 (m, 2H), 2.66 – 2.55 (m, 2H), 1.70 – 1.59 (m, 3H), 1.52 – 1.37 (m, 3H), 1.16 (d, *J* = 6.3 Hz, 3H). <sup>13</sup>C NMR (100 MHz, DMSO) δ 148.8, 142.75, 129.4, 128.75, 128.7, 126.1, 115.5, 112.7, 47.6, 36.6, 35.7, 31.7, 25.9, 20.9. HRMS (ESI-TOF) m/z: [M + H]<sup>+</sup> Calcd for C<sub>18</sub>H<sub>24</sub>N<sup>+</sup> 254.1903, Found: 254.1904.

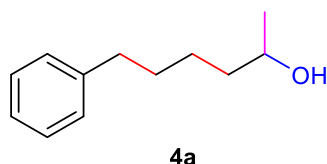

6-phenylhexan-2-ol (**4a**). Eluent: PE/EA = 5:1, colorless oil (16.1 mg, 90%). <sup>1</sup>H NMR (400 MHz, CDCl<sub>3</sub>) δ 7.33 – 7.26 (m, 2H), 7.22 – 7.16 (m, 3H), 3.86 – 3.73 (m, 1H),

2.64 (t, *J* = 7.7 Hz, 2H), 1.71 – 1.61 (m, 2H), 1.56 – 1.33 (m, 5H), 1.19 (d, *J* = 6.2 Hz, 3H). <sup>13</sup>C NMR (100 MHz, CDCl<sub>3</sub>) δ 142.7, 128.5, 128.4, 125.8, 68.2, 39.3, 36.0, 31.6, 25.6, 23.6. HRMS (ESI-TOF) m/z: [M + Na]<sup>+</sup> Calcd for C<sub>12</sub>H<sub>18</sub>ONa<sup>+</sup> 201.1250,

Found: 201.1250.

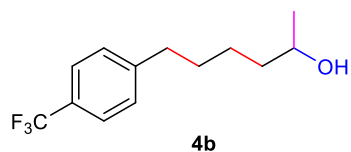

6-(4-(trifluoromethyl)phenyl)hexan-2-ol (**4b**). Eluent: PE/EA = 5:1, colorless oil (18.5 mg, 75%).  $^1\text{H}$  NMR (400 MHz,  $\text{CDCl}_3$ )  $\delta$  7.53 (d,  $J = 8.0$  Hz, 2H), 7.32 – 7.27 (m, 2H), 3.87 – 3.72 (m, 1H), 2.68 (t,  $J = 7.7$  Hz, 2H), 1.70 – 1.61 (m, 2H), 1.53 – 1.32 (m, 5H), 1.19 (d,  $J = 6.2$  Hz, 3H).  $^{13}\text{C}$  NMR (100 MHz,  $\text{CDCl}_3$ )  $\delta$  146.8, 128.8, 128.1 (q,  $J = 32.1$  Hz, 1C), 125.3 (q,  $J = 3.7$  Hz, 1C), 124.5 (q,  $J = 270.1$  Hz, 1C), 68.15, 39.2, 35.9, 31.35, 25.5, 23.7.  $^{19}\text{F}$  NMR (376 MHz,  $\text{CDCl}_3$ )  $\delta$  -62.24. HRMS (ESI-TOF)  $m/z$ :  $[\text{M} + \text{Na}]^+$  Calcd for  $\text{C}_{13}\text{H}_{17}\text{F}_3\text{ONa}^+$  269.1124, Found: 269.1123.

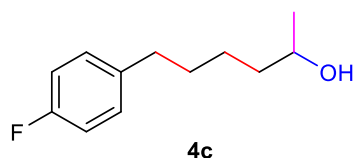

6-(4-fluorophenyl)hexan-2-ol (**4c**). Eluent: PE/EA = 7:1, colorless oil (14.6 mg, 74%).  $^1\text{H}$  NMR (400 MHz,  $\text{CDCl}_3$ )  $\delta$  7.17 – 7.07 (m, 2H), 7.00 – 6.89 (m, 2H), 3.84 – 3.73 (m, 1H), 2.59 (t,  $J = 7.7$  Hz, 2H), 1.66 – 1.56 (m, 2H), 1.54 – 1.27 (m, 5H), 1.18 (d,  $J = 6.2$  Hz, 3H).  $^{13}\text{C}$  NMR (100 MHz,  $\text{CDCl}_3$ )  $\delta$  161.3 (d,  $J = 241.5$  Hz, 1C), 138.3 (d,  $J = 3.3$  Hz, 1C), 129.8 (d,  $J = 7.6$  Hz, 2C), 115.1 (d,  $J = 20.7$  Hz, 2C), 68.2, 39.2, 35.2, 31.75, 25.5, 23.7.  $^{19}\text{F}$  NMR (376 MHz,  $\text{CDCl}_3$ )  $\delta$  -118.07. HRMS (ESI-TOF)  $m/z$ :  $[\text{M} + \text{Na}]^+$  Calcd for  $\text{C}_{12}\text{H}_{17}\text{FONa}^+$  219.1156, Found: 219.1152.

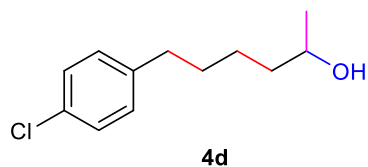

6-(4-chlorophenyl)hexan-2-ol (**4d**). Eluent: PE/EA = 7:1, colorless oil (15.3 mg, 72%).  $^1\text{H}$  NMR (400 MHz,  $\text{CDCl}_3$ )  $\delta$  7.28 – 7.20 (m, 2H), 7.14 – 7.06 (m, 2H), 3.85 – 3.72 (m, 1H), 2.59 (t,  $J = 7.7$  Hz, 2H), 1.67 – 1.56 (m, 2H), 1.52 – 1.29 (m, 5H), 1.18 (d,  $J = 6.2$  Hz, 3H).  $^{13}\text{C}$  NMR (100 MHz,  $\text{CDCl}_3$ )  $\delta$  141.1, 131.4, 129.85, 128.5, 68.2, 39.2, 35.4, 31.5, 25.45, 23.7. HRMS (ESI-TOF)  $m/z$ :  $[\text{M} + \text{Na}]^+$  Calcd for  $\text{C}_{12}\text{H}_{17}\text{ClONa}^+$  235.0860, Found: 235.0855.

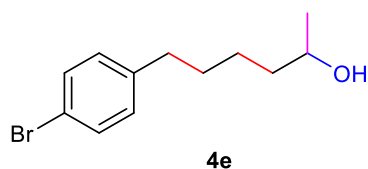

6-(4-bromophenyl)hexan-2-ol (**4e**). Eluent: PE/EA = 6:1, colorless oil (10.3 mg, 40%).  $^1\text{H}$  NMR (400 MHz,



CDCl<sub>3</sub>)  $\delta$  7.42 – 7.35 (m, 2H), 7.08 – 7.00 (m, 2H), 3.85 – 3.73 (m, 1H), 2.57 (t,  $J$  = 7.6 Hz, 2H), 1.67 – 1.57 (m, 2H), 1.51 – 1.28 (m, 5H), 1.18 (d,  $J$  = 6.2 Hz, 3H). <sup>13</sup>C NMR (100 MHz, CDCl<sub>3</sub>)  $\delta$  141.6, 131.4, 130.3, 119.5, 68.2, 39.2, 35.4, 31.5, 25.45, 23.7. HRMS (ESI-TOF)  $m/z$ : [M + Na]<sup>+</sup> Calcd for C<sub>12</sub>H<sub>17</sub><sup>81</sup>BrONa<sup>+</sup> 281.0335, Found: 281.0329.

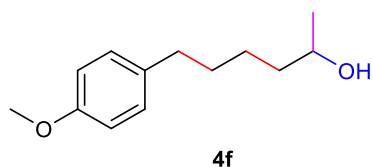

6-(4-methoxyphenyl)hexan-2-ol (**4f**). Eluent: PE/EA = 5:1, light yellow oil (14.4 mg, 69%). <sup>1</sup>H NMR (400 MHz, CDCl<sub>3</sub>)  $\delta$  7.14 – 7.05 (m, 2H), 6.87 – 6.76 (m, 2H), 3.83 – 3.74 (m, 4H), 2.56 (t,  $J$  = 7.7 Hz, 2H), 1.69 – 1.57 (m, 2H), 1.52 – 1.29 (m, 5H), 1.18 (d,  $J$  = 6.1 Hz, 3H). <sup>13</sup>C NMR (100 MHz, CDCl<sub>3</sub>)  $\delta$  157.7, 134.8, 129.4, 113.8, 68.2, 55.4, 39.3, 35.1, 31.9, 25.5, 23.65. HRMS (ESI-TOF)  $m/z$ : [M + Na]<sup>+</sup> Calcd for C<sub>13</sub>H<sub>20</sub>O<sub>2</sub>Na<sup>+</sup> 231.1356, Found: 231.1352.

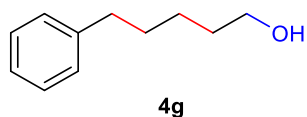

5-phenylpentan-1-ol (**4g**). Eluent: PE/EA = 7:1, light yellow oil (11.7 mg, 71%). <sup>1</sup>H NMR (400 MHz, CDCl<sub>3</sub>)  $\delta$  7.37 – 7.27 (m, 2H), 7.22 – 7.15 (m, 3H), 3.70 – 3.60 (m, 2H), 2.67 – 2.59 (m, 2H), 1.70 – 1.58 (m, 5H), 1.45 – 1.36 (m, 2H). <sup>13</sup>C NMR (100 MHz, CDCl<sub>3</sub>)  $\delta$  142.7, 128.5, 128.4, 125.8, 63.1, 36.0, 32.8, 31.4, 25.5. HRMS (ESI-TOF)  $m/z$ : [M + Na]<sup>+</sup> Calcd for C<sub>11</sub>H<sub>16</sub>ONa<sup>+</sup> 187.1093, Found: 187.1089.

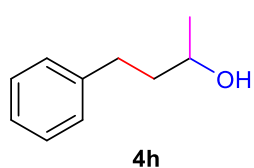

4-phenylbutan-2-ol (**4h**). Eluent: PE/EA = 10:1, colorless oil (12.9 mg, 86%). <sup>1</sup>H NMR (400 MHz, CDCl<sub>3</sub>)  $\delta$  7.34 – 7.27 (m, 2H), 7.25 – 7.16 (m, 3H), 3.89 – 3.79 (m, 1H), 2.82 – 2.64 (m, 2H), 1.86 – 1.72 (m, 2H), 1.62 (s, 1H), 1.24 (d,  $J$  = 6.2 Hz, 3H). <sup>13</sup>C NMR (100 MHz, CDCl<sub>3</sub>)  $\delta$  142.2, 128.5, 125.9, 67.6, 40.95, 32.2, 23.7. HRMS (ESI-TOF)  $m/z$ : [M + Na]<sup>+</sup> Calcd for C<sub>10</sub>H<sub>14</sub>ONa<sup>+</sup> 173.0937, Found: 173.0938.

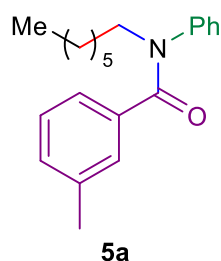

N-heptyl-3-methyl-N-phenylbenzamide (**5a**). Eluent: PE/EA = 20:1, colorless oil (27.0 mg, 87%). <sup>1</sup>H NMR (400 MHz, CDCl<sub>3</sub>)  $\delta$

7.25 – 7.09 (m, 4H), 7.06 – 6.95 (m, 5H), 3.95 – 3.84 (m, 2H), 2.21 (s, 3H), 1.67 – 1.57 (m, 2H), 1.37 – 1.19 (m, 8H), 0.89 – 0.83 (m, 3H).  $^{13}\text{C}$  NMR (100 MHz,  $\text{CDCl}_3$ )  $\delta$  170.6, 143.7, 137.55, 136.5, 130.2, 129.5, 129.1, 127.9, 127.5, 126.6, 125.75, 50.6, 31.9, 29.2, 27.85, 27.0, 22.7, 21.3, 14.2. HRMS (ESI-TOF)  $m/z$ :  $[\text{M} + \text{H}]^+$  Calcd for  $\text{C}_{21}\text{H}_{28}\text{NO}^+$  310.2165, Found: 310.2167.

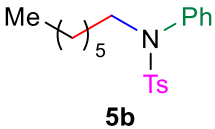
**5b** N-heptyl-4-methyl-N-phenylbenzenesulfonamide (**5b**). Eluent: PE/EA = 50:1, white solid (24.8 mg, 72%, m.p. 74 – 75 °C).  $^1\text{H}$  NMR (400 MHz,  $\text{CDCl}_3$ )  $\delta$  7.49 – 7.43 (m, 2H), 7.33 – 7.27 (m, 3H), 7.23 (d,  $J = 8.0$  Hz, 2H), 7.07 – 7.00 (m, 2H), 3.51 (t,  $J = 7.0$  Hz, 2H), 2.42 (s, 3H), 1.44 – 1.34 (m, 2H), 1.33 – 1.14 (m, 8H), 0.85 (t,  $J = 6.9$  Hz, 3H).  $^{13}\text{C}$  NMR (100 MHz,  $\text{CDCl}_3$ )  $\delta$  143.3, 139.3, 135.5, 129.4, 129.0, 128.9, 127.9, 127.8, 50.6, 31.8, 28.9, 28.3, 26.5, 22.7, 21.7, 14.2. HRMS (ESI-TOF)  $m/z$ :  $[\text{M} + \text{H}]^+$  Calcd for  $\text{C}_{20}\text{H}_{28}\text{NO}_2\text{S}^+$  346.1835, Found: 346.1836.

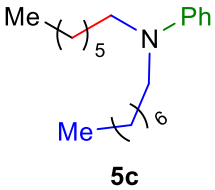
**5c** N-heptyl-N-octylaniline (**5c**). Eluent: PE/EA = 100:1, colorless oil (26.0 mg, 85%).  $^1\text{H}$  NMR (400 MHz,  $\text{CDCl}_3$ )  $\delta$  7.25 – 7.18 (m, 2H), 6.70 – 6.60 (m, 3H), 3.31 – 3.22 (m, 4H), 1.65 – 1.56 (m, 4H), 1.40 – 1.25 (m, 18H), 0.92 (t,  $J = 6.6$  Hz, 6H).  $^{13}\text{C}$  NMR (100 MHz,  $\text{CDCl}_3$ )  $\delta$  148.3, 129.3, 115.2, 111.8, 51.2, 32.1, 32.0, 29.7, 29.5, 29.4, 27.41, 27.39, 27.36, 27.33, 22.82, 22.79, 14.25. HRMS (ESI-TOF)  $m/z$ :  $[\text{M} + \text{H}]^+$  Calcd for  $\text{C}_{21}\text{H}_{38}\text{N}^+$  304.2999, Found: 304.2999.

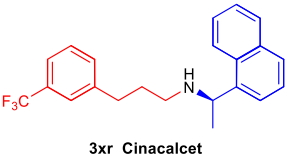
**3xr Cinacalcet** (**3xr**). Eluent: PE/EA = 4:1, yellow oil (20.1 mg, 56%).  $^1\text{H}$  NMR (400 MHz,  $\text{CDCl}_3$ )  $\delta$  8.19 (d,  $J = 8.1$  Hz, 1H), 7.91 - 7.87 (m, 1H), 7.79 - 7.74 (m, 1H), 7.68 - 7.64 (m, 1H), 7.55 – 7.47 (m, 3H), 7.45 – 7.41 (m, 2H), 7.38 – 7.29 (m, 2H), 4.64 (q,  $J = 6.6$  Hz, 1H), 2.78 – 2.56 (m, 4H), 1.90 - 1.81 (m, 2H), 1.51 (d,  $J = 6.6$  Hz, 3H).  $^{13}\text{C}$  NMR (100 MHz,  $\text{CDCl}_3$ )  $\delta$  143.15, 141.2, 134.1, 131.9 (d,  $J$

= 1.0 Hz, 1C), 131.4, 130.6 (q,  $J = 31.8$  Hz, 1C), 129.1, 128.8, 127.3, 125.9, 125.8, 125.5, 125.2 (q,  $J = 3.7$  Hz, 1C), 124.4 (q,  $J = 270.5$  Hz, 1C), 123.0, 122.8 (q,  $J = 3.7$  Hz, 1C), 122.7, 53.8, 47.4, 33.5, 32.0, 23.7.  $^{19}\text{F}$  NMR (376 MHz,  $\text{CDCl}_3$ )  $\delta$  -62.47. HRMS (ESI-TOF)  $m/z$ :  $[\text{M} + \text{H}]^+$  Calcd for  $\text{C}_{22}\text{H}_{23}\text{F}_3\text{N}^+$  358.1777, Found: 358.1773.

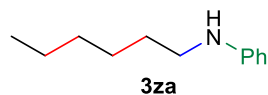

N-hexylaniline (**3za**). Eluent: PE/EA = 100:1, light yellow oil (6.6 mg, 37%).  $^1\text{H}$  NMR (400 MHz,  $\text{CDCl}_3$ )  $\delta$  7.17 (t,  $J = 7.9$  Hz, 2H), 6.69 (t,  $J = 7.3$  Hz, 1H), 6.61 (d,  $J = 7.9$  Hz, 2H), 3.70 (s, 1H), 3.10 (t,  $J = 7.2$  Hz, 2H), 1.67 – 1.57 (m, 3H), 1.36 – 1.27 (m, 5H), 0.95 – 0.86 (m, 3H).  $^{13}\text{C}$  NMR (100 MHz,  $\text{CDCl}_3$ )  $\delta$  129.4, 117.3, 112.9, 44.2, 31.8, 29.7, 27.0, 22.8, 14.2. HRMS (ESI-TOF)  $m/z$ :  $[\text{M} + \text{H}]^+$  Calcd for  $\text{C}_{12}\text{H}_{20}\text{N}^+$  178.1590, Found: 178.1587.

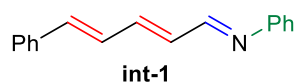

(1E,2E,4E)-N,5-diphenylpenta-2,4-dien-1-imine(**int-1**). Yellow solid (420 mg, 90%).  $^1\text{H}$  NMR (400 MHz,  $\text{CDCl}_3$ )  $\delta$  8.19 (d,  $J = 9.2$  Hz, 1H), 7.53 – 7.46 (m, 2H), 7.41 – 7.34 (m, 4H), 7.33 – 7.27 (m, 1H), 7.24 – 7.19 (m, 1H), 7.19 – 7.14 (m, 2H), 7.05 – 6.93 (m, 2H), 6.88 – 6.79 (m, 1H), 6.72 – 6.61 (m, 1H). The analytical data are consistent with those reported in the literature.<sup>14</sup>

## 7. NMR Spectrum and HRMS Data

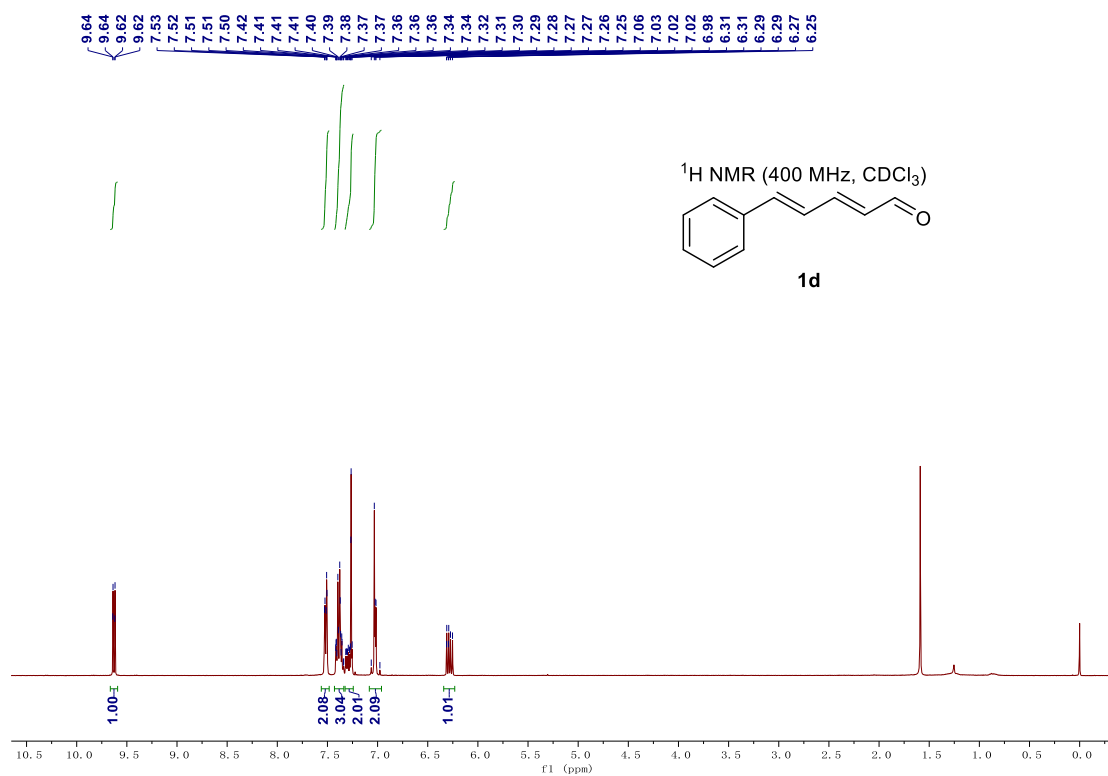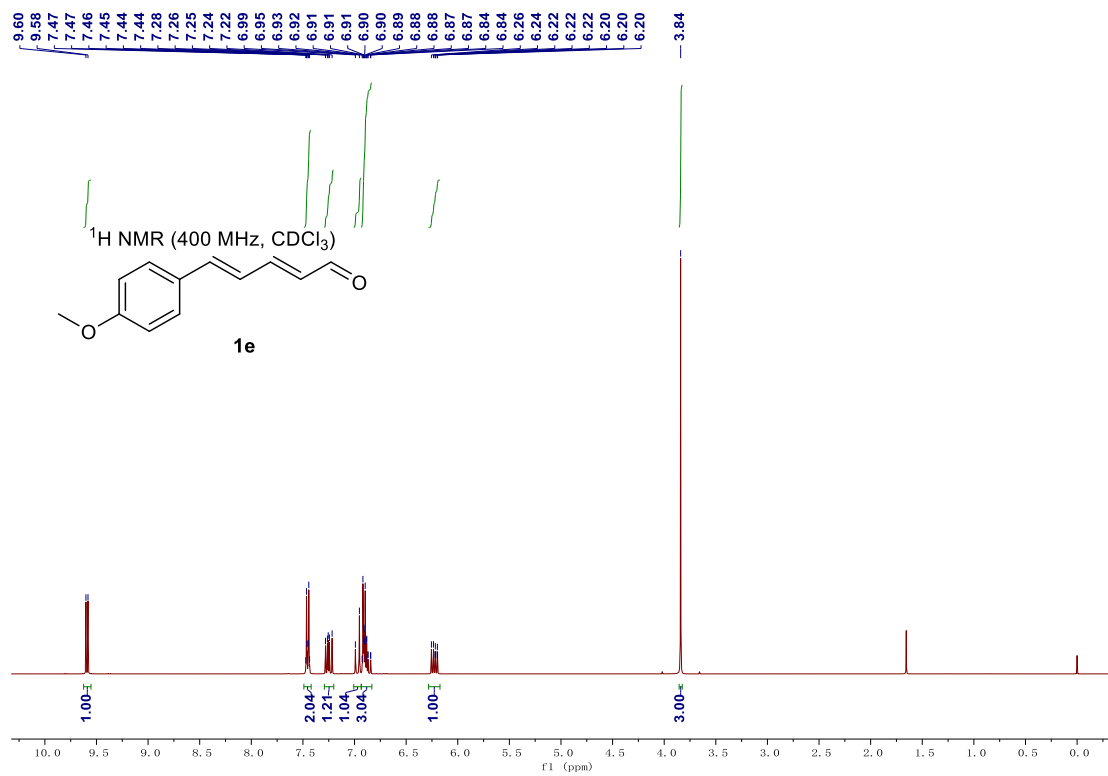

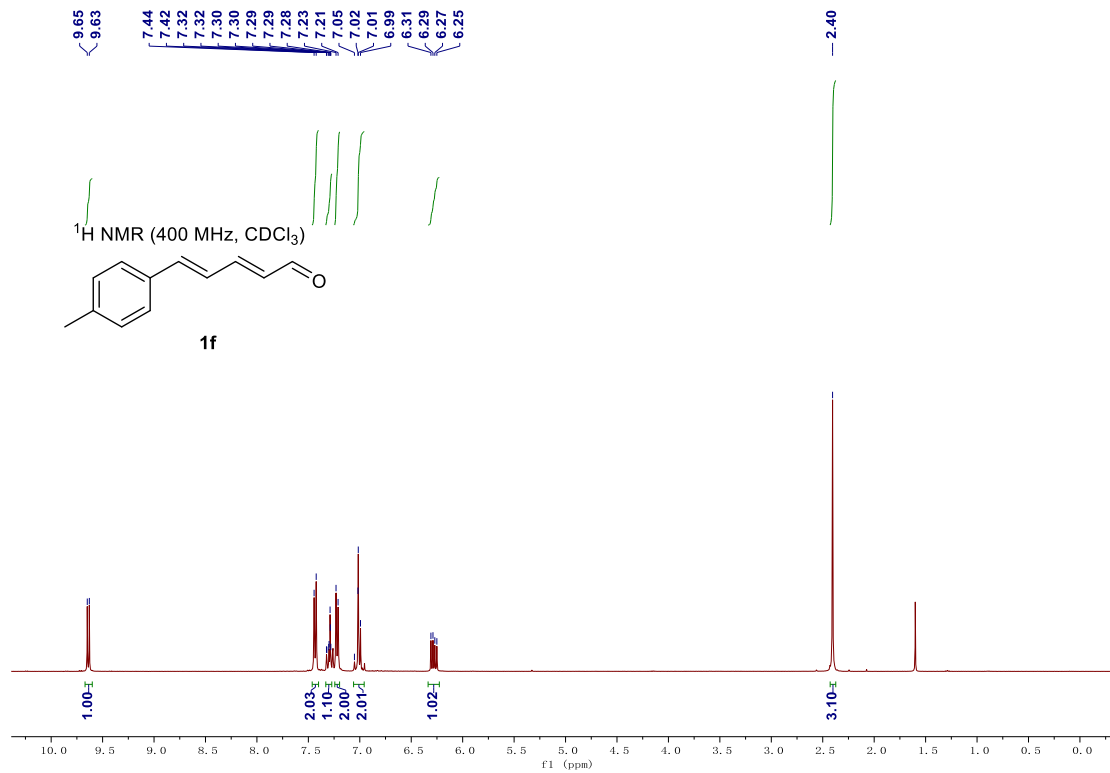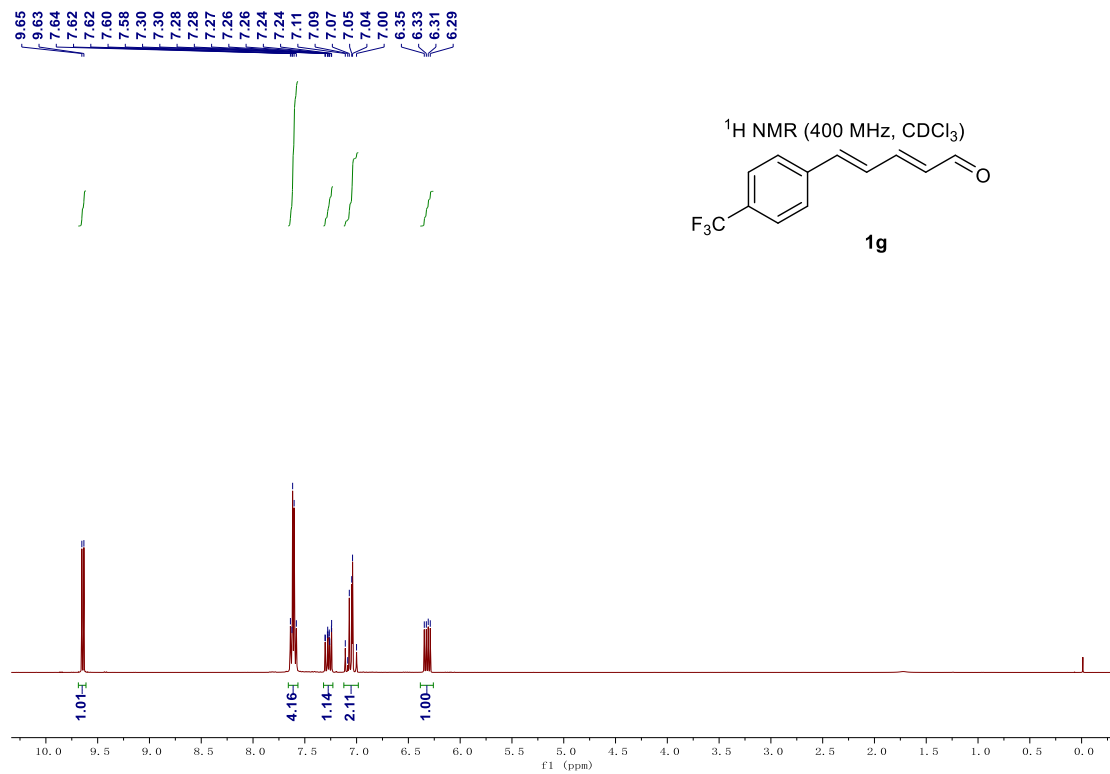

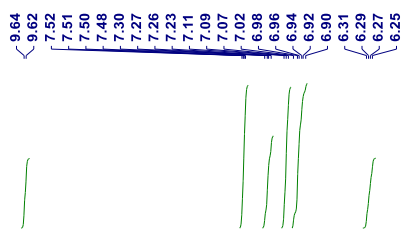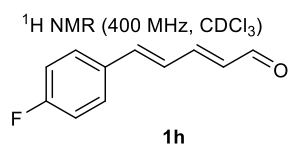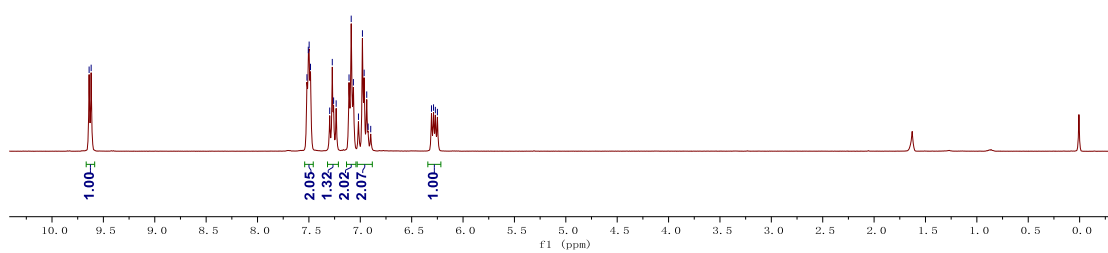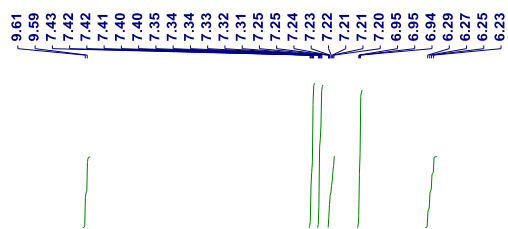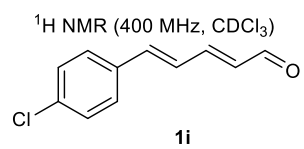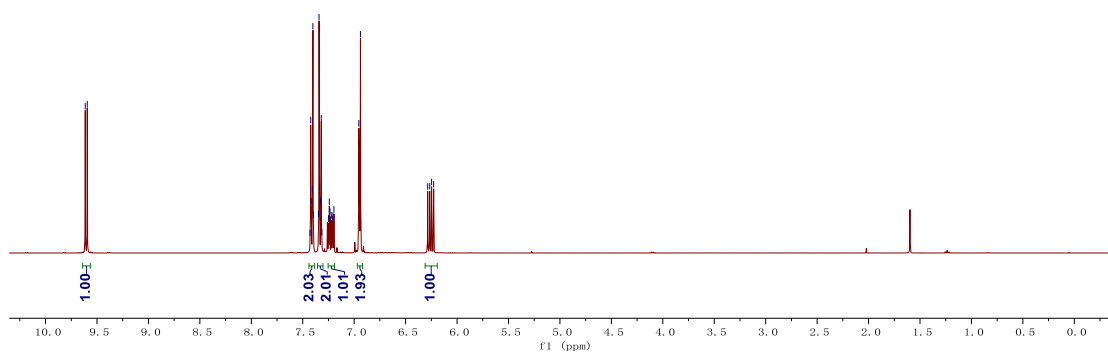

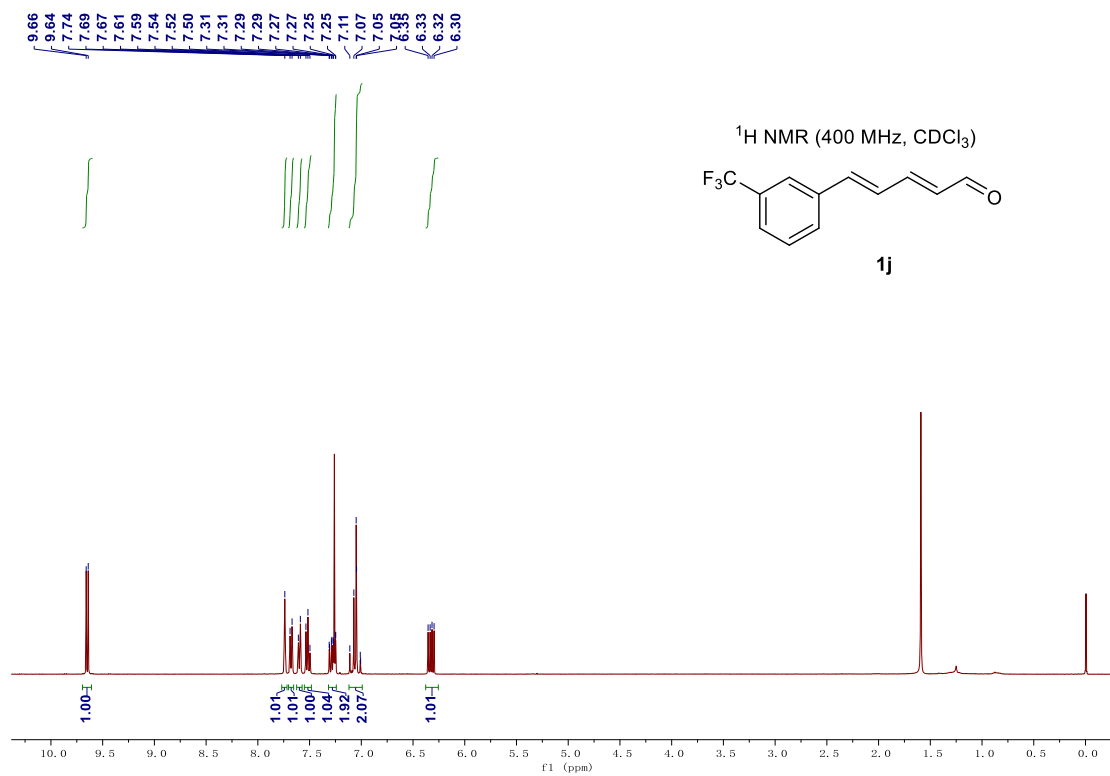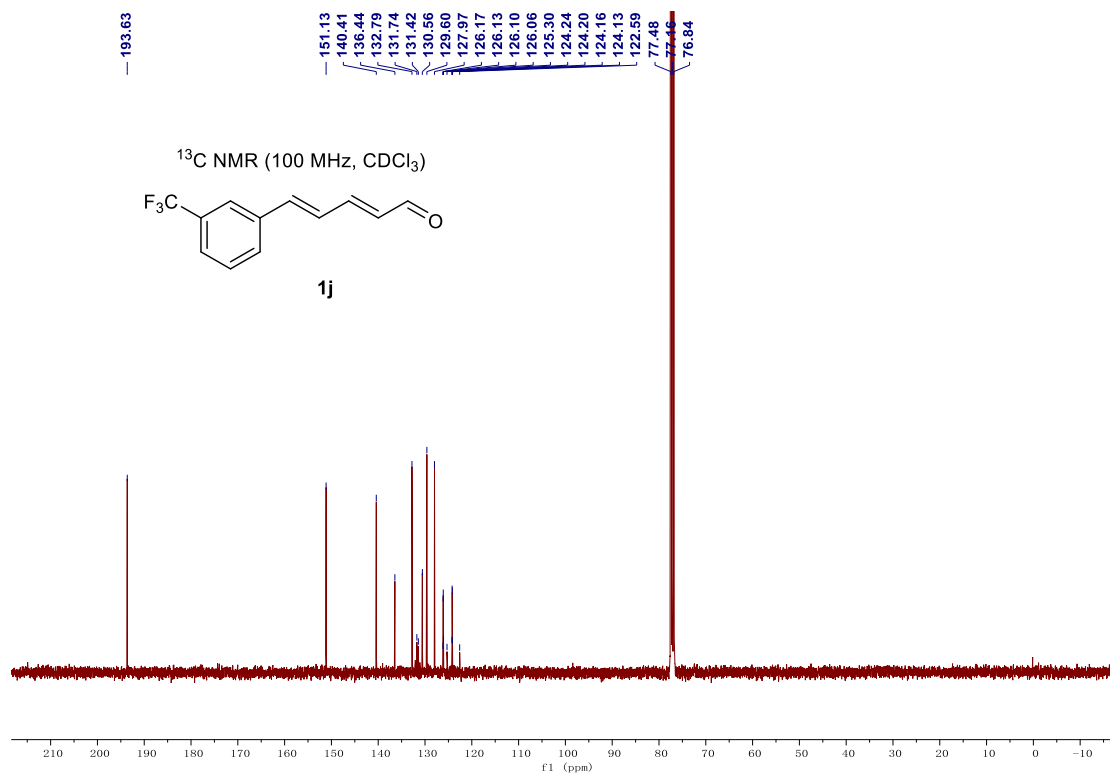

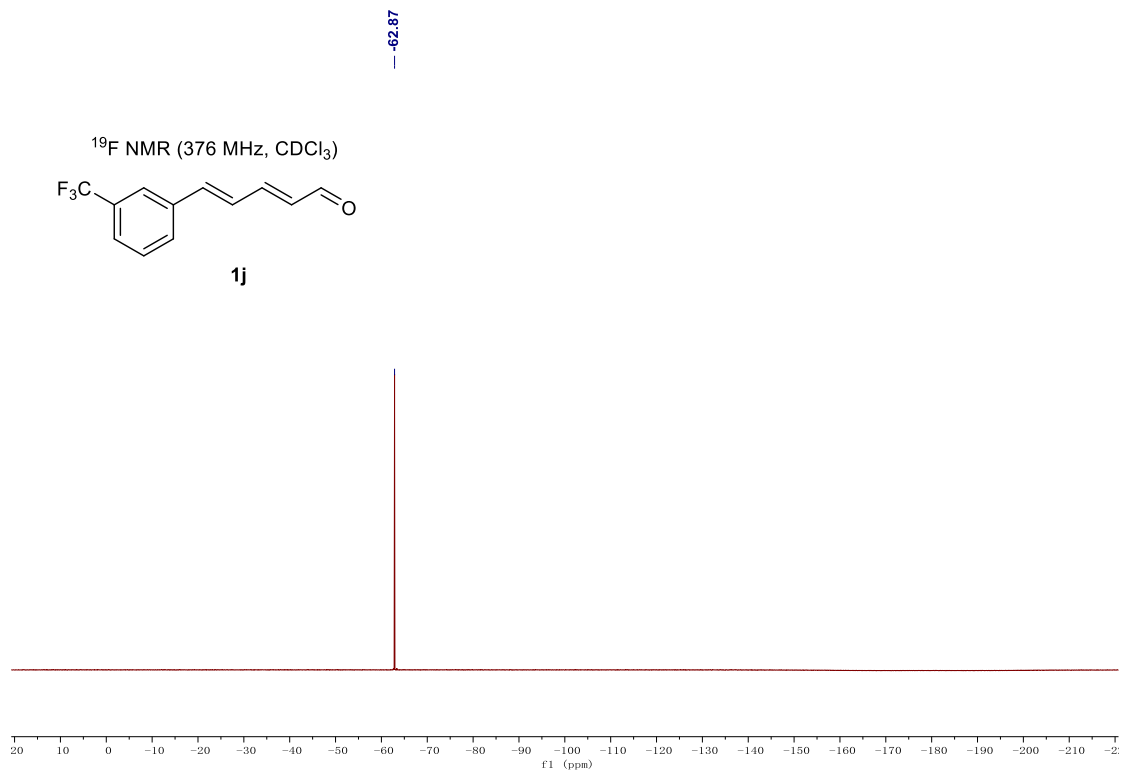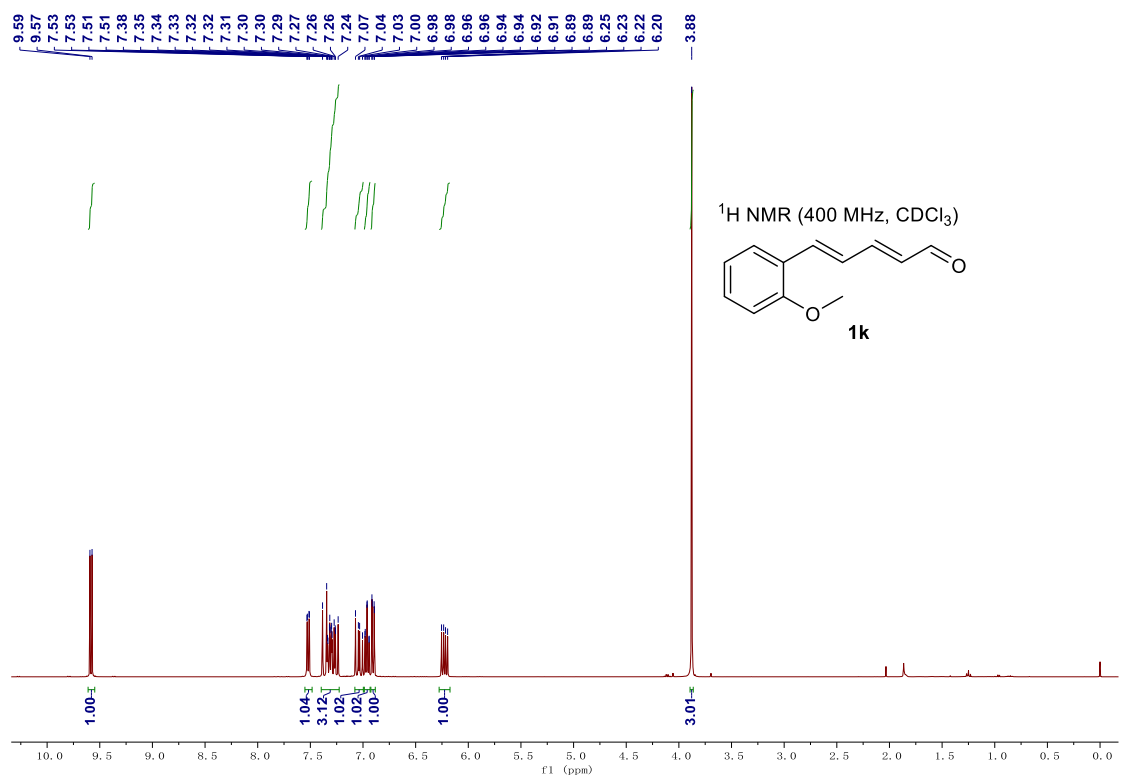



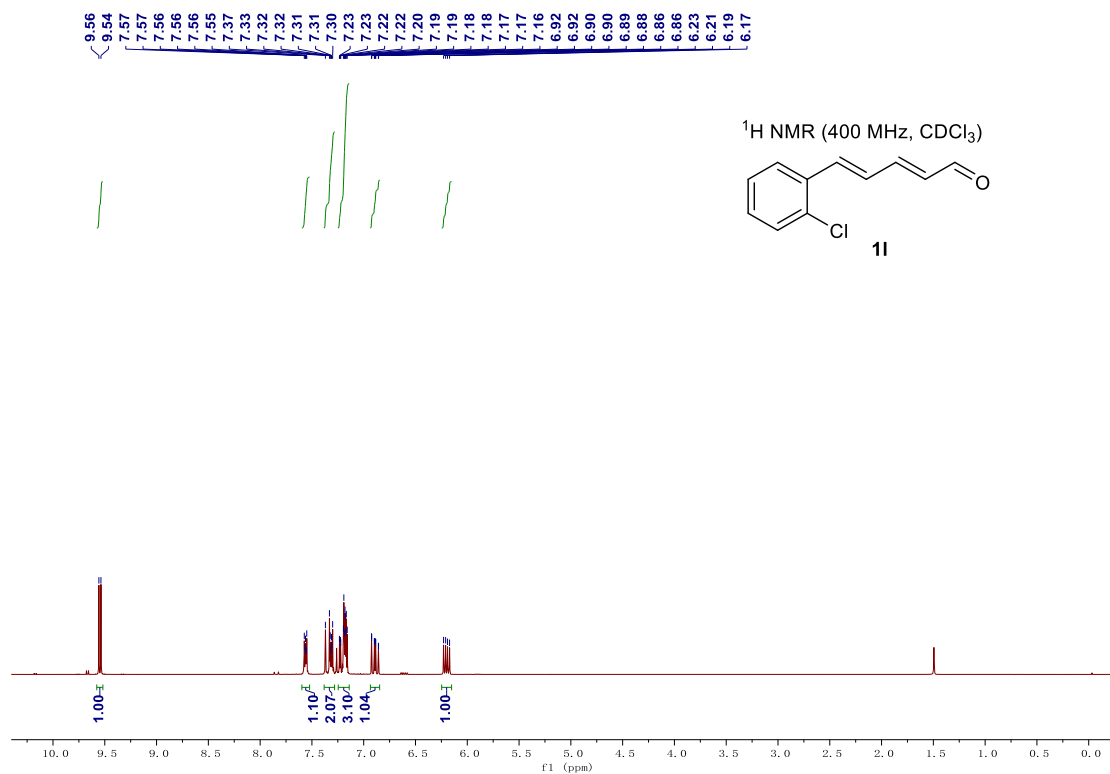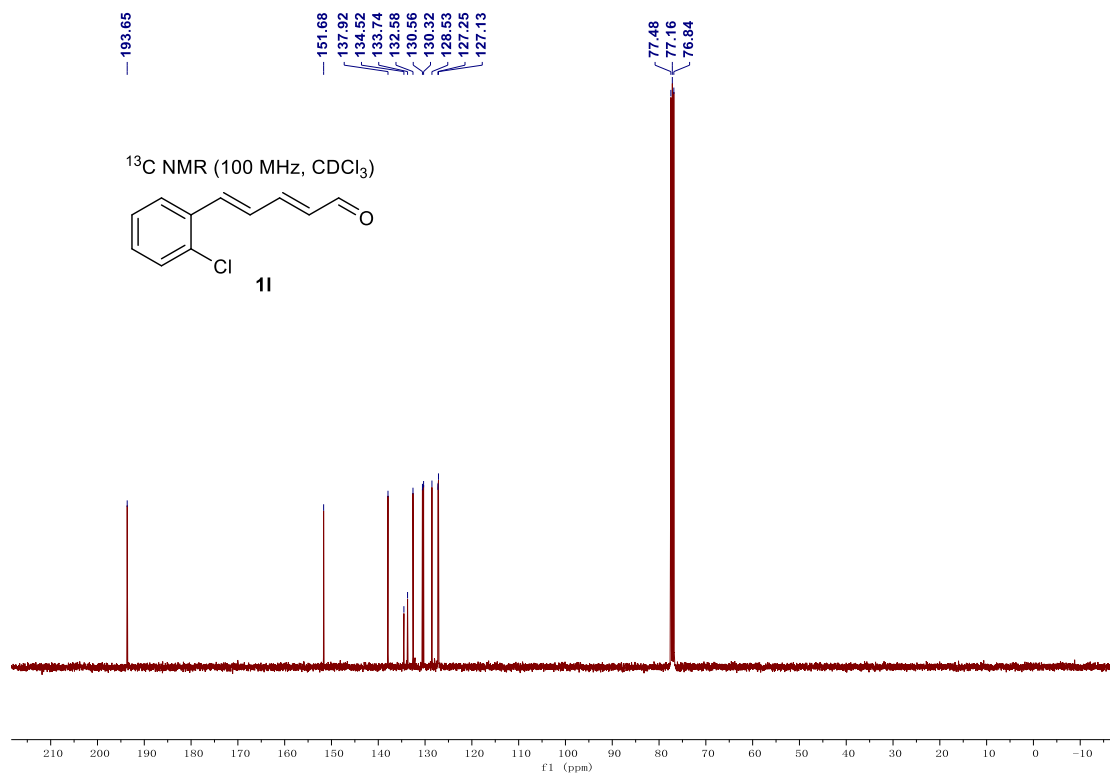

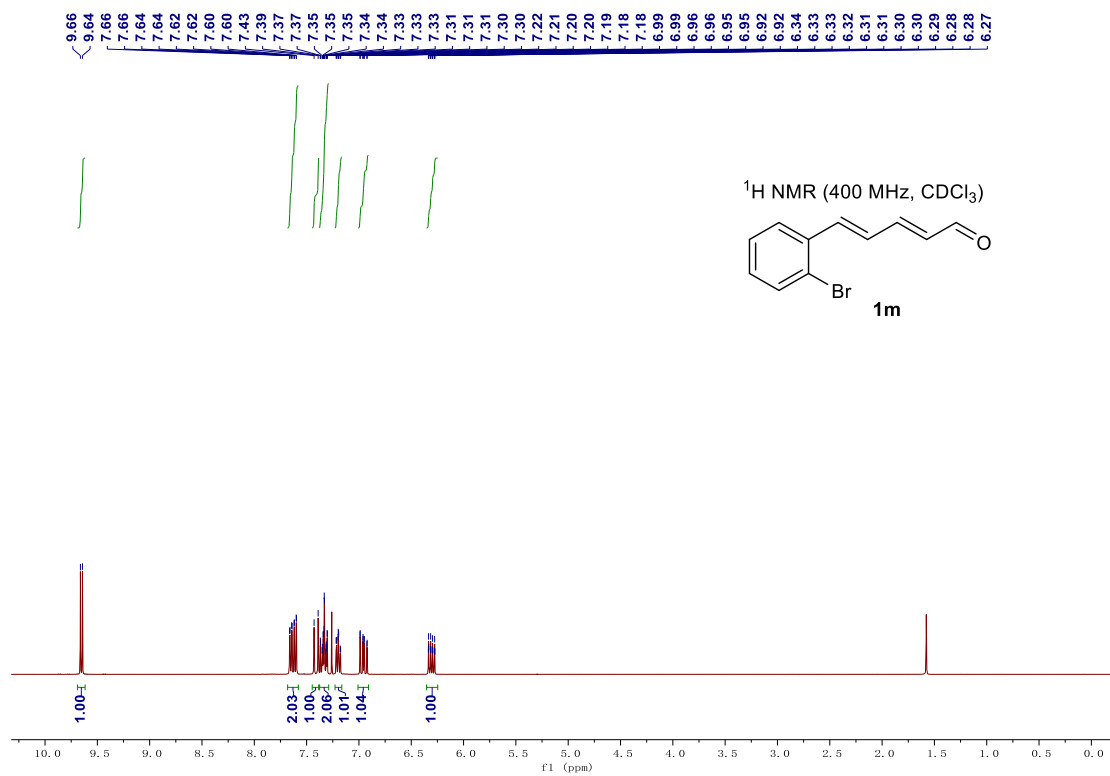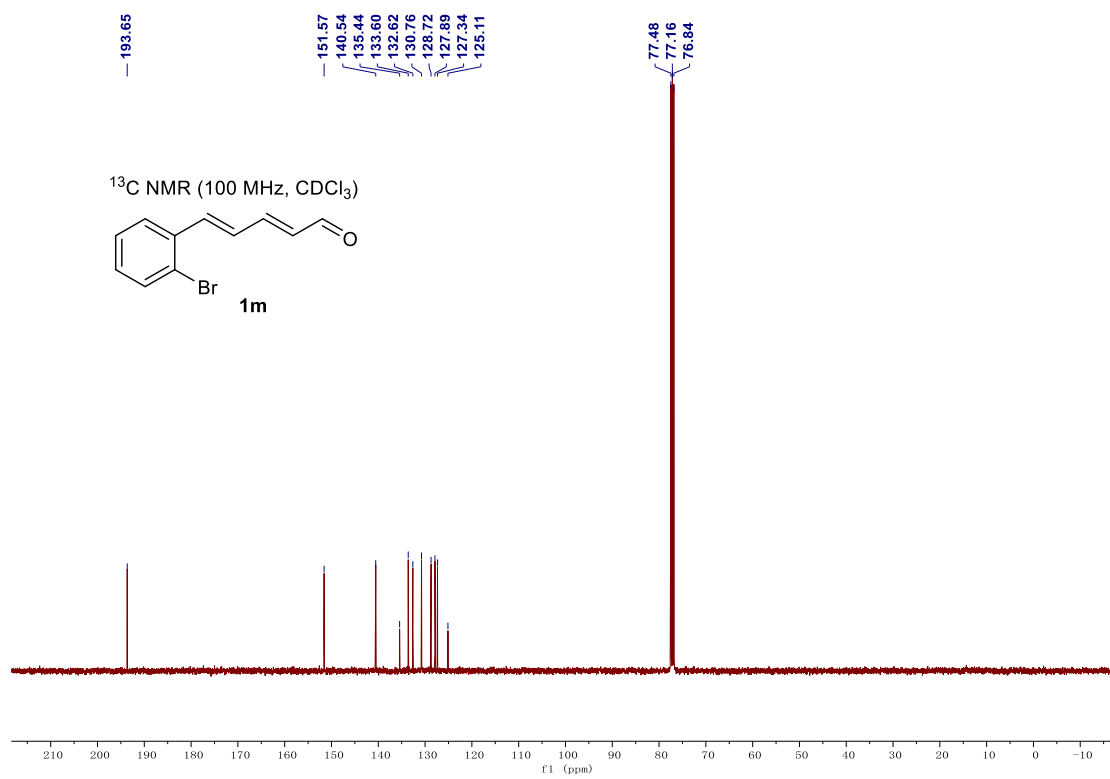

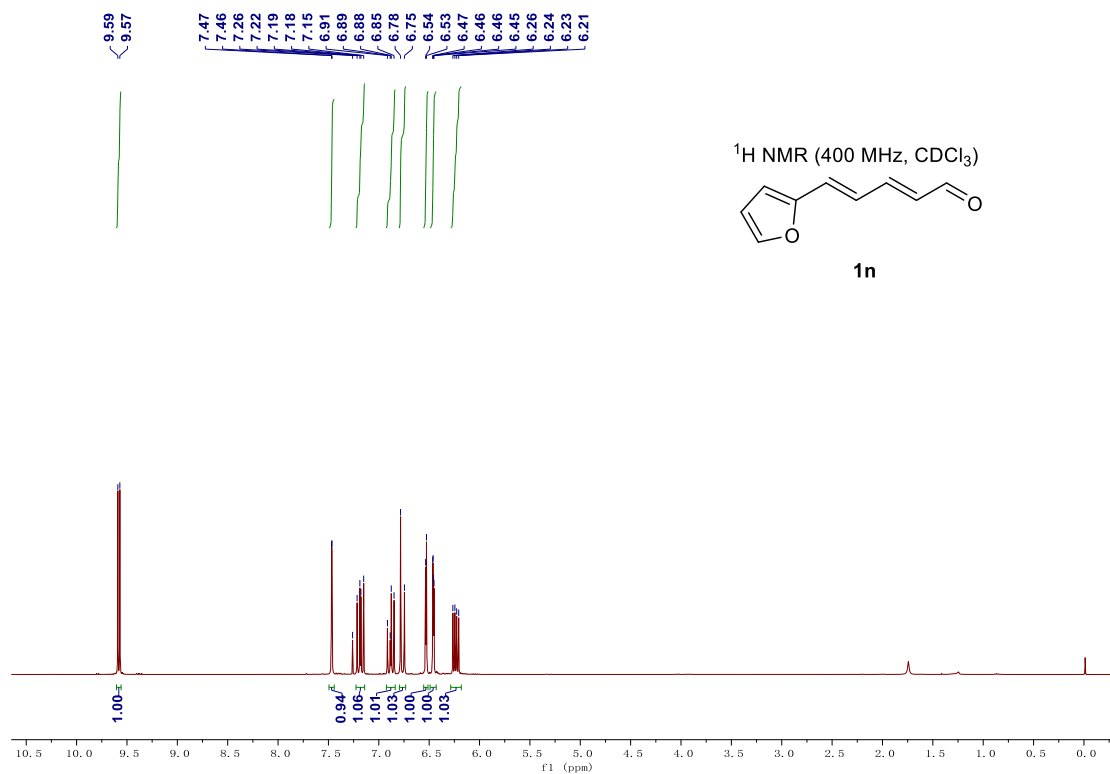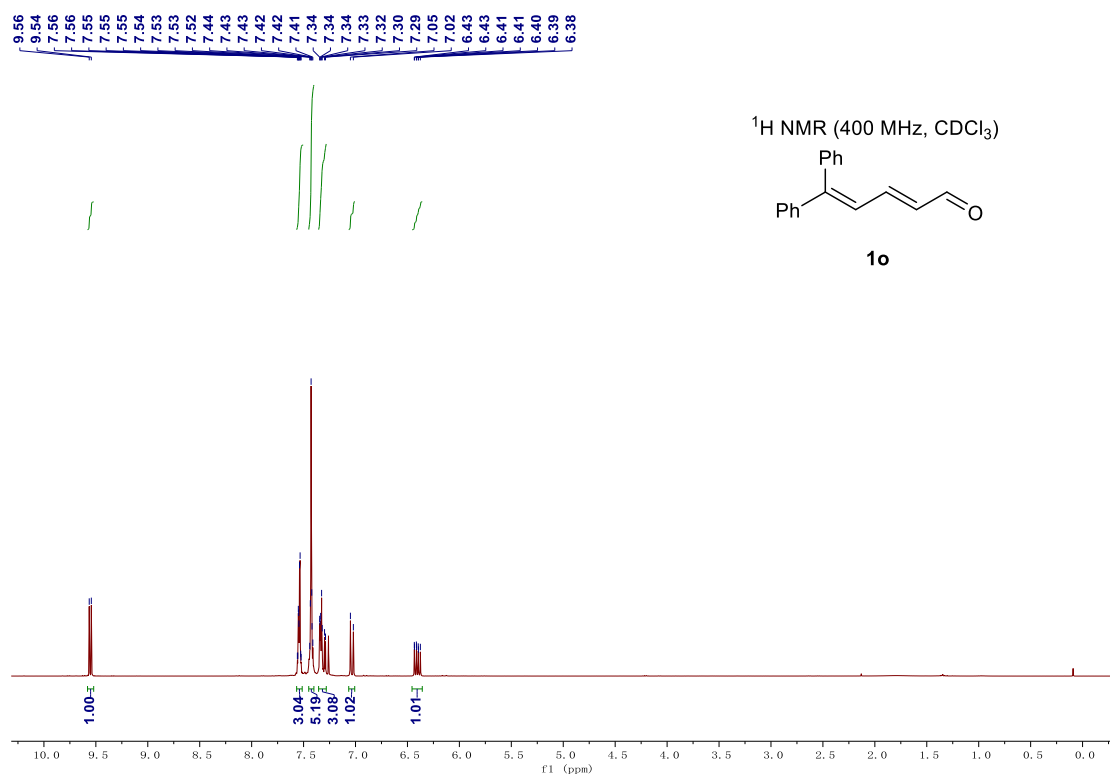

9.51  
7.49  
7.48  
7.47  
7.46  
7.45  
7.44  
7.44  
7.34  
7.33  
7.33  
7.32  
7.31  
7.26  
7.09  
7.08  
7.07  
7.06  
7.05  
7.05  
7.03  
7.03  
7.00  
7.00  
6.99  
6.99  
6.97  
6.96  
6.43  
6.43  
6.41  
6.40  
6.39  
6.38  
6.37

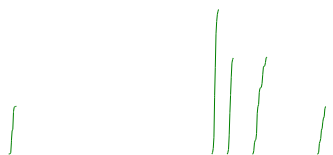

<sup>1</sup>H NMR (400 MHz, CDCl<sub>3</sub>)

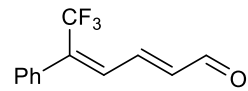

**1p**

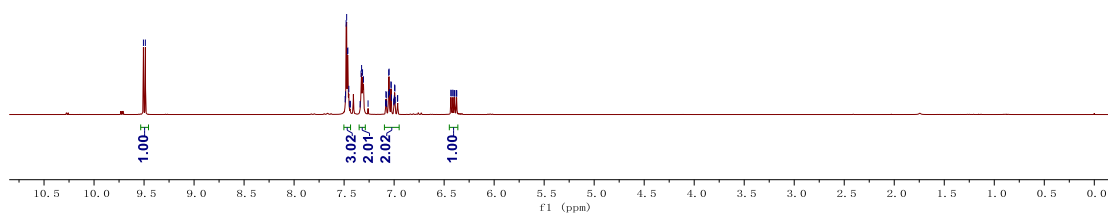

193.03

144.57  
139.43  
139.13  
138.82  
138.52  
137.01  
130.83  
130.41  
130.35  
130.29  
130.23  
129.84  
129.75  
128.90  
127.04  
124.32  
121.60  
118.88

77.48  
77.16  
76.84

<sup>13</sup>C NMR (100 MHz, CDCl<sub>3</sub>)

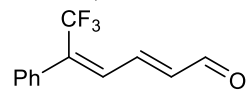

**1p**

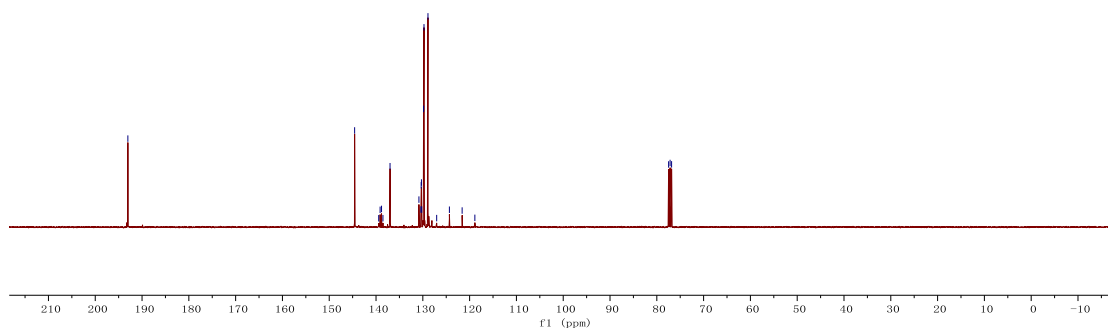

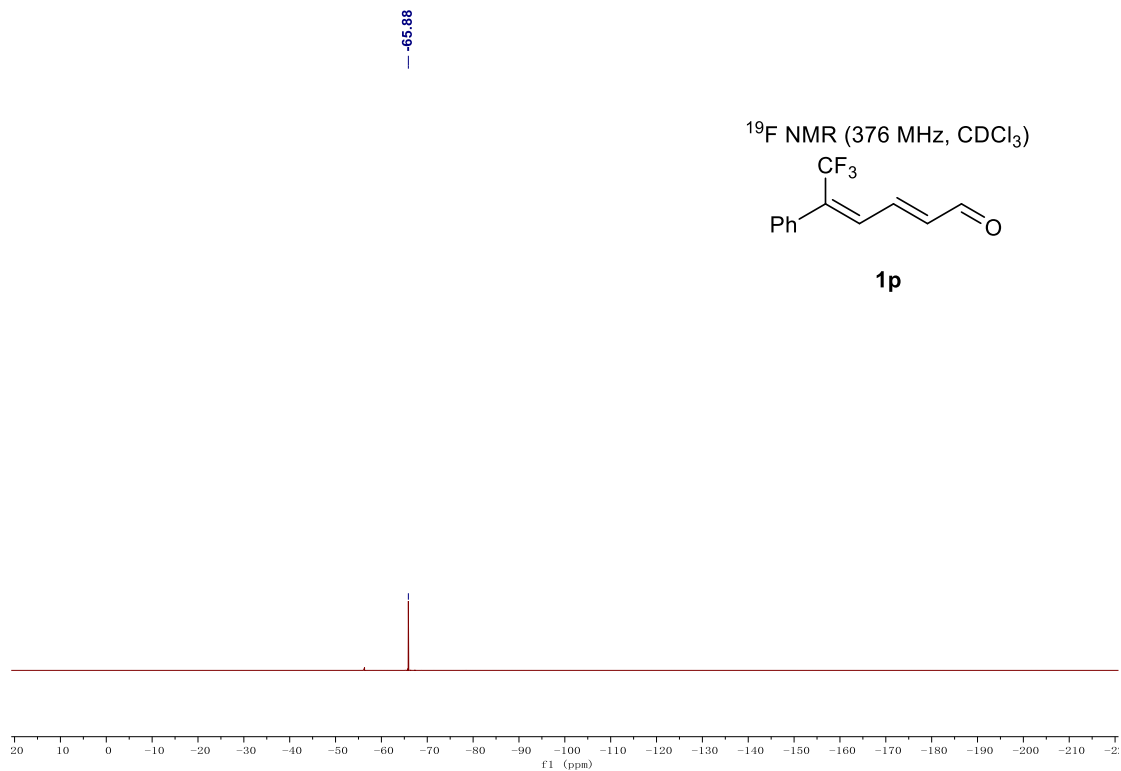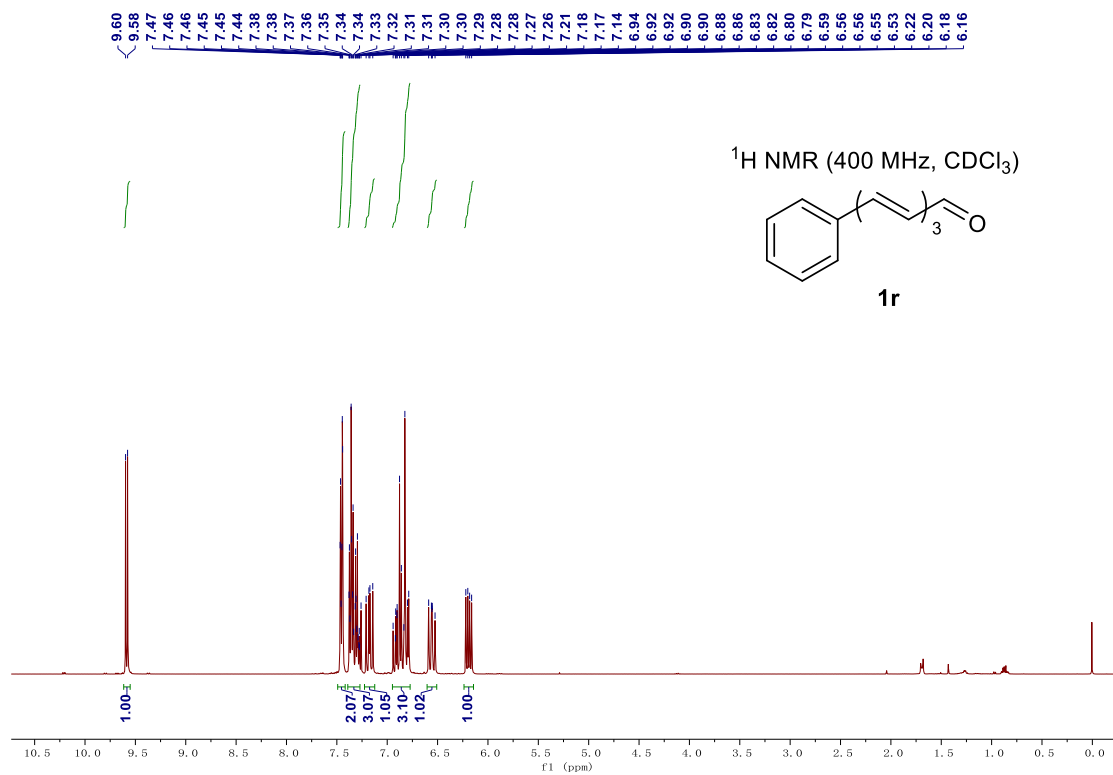

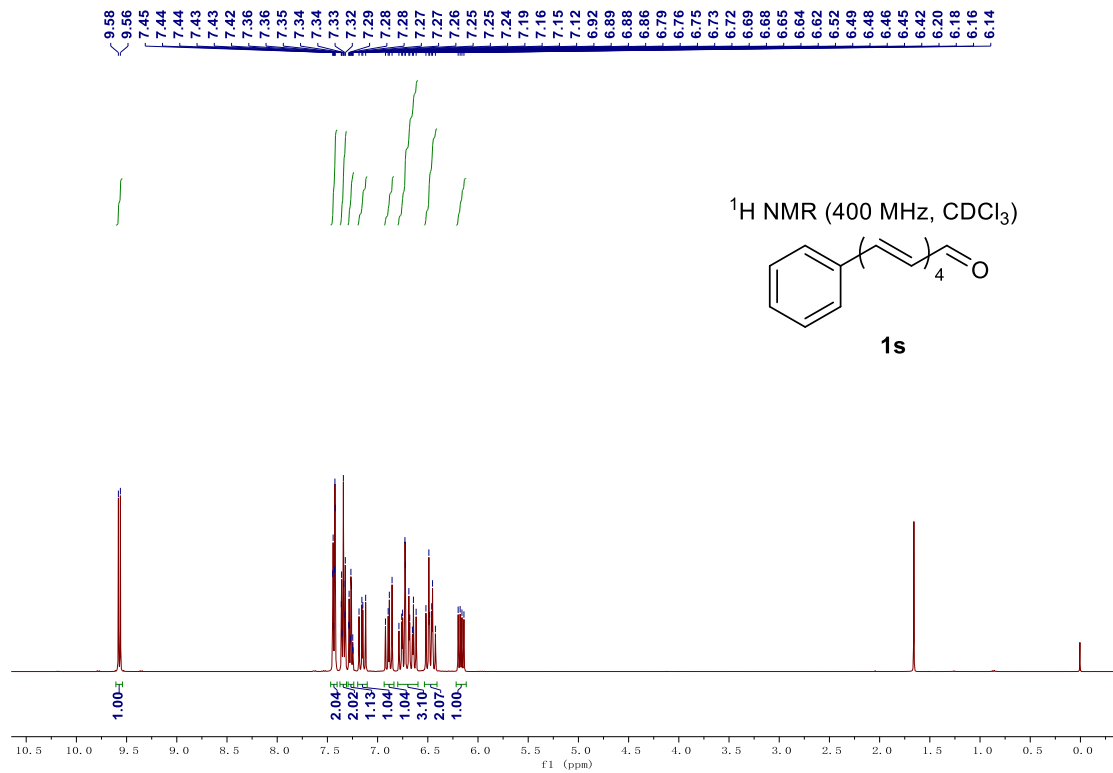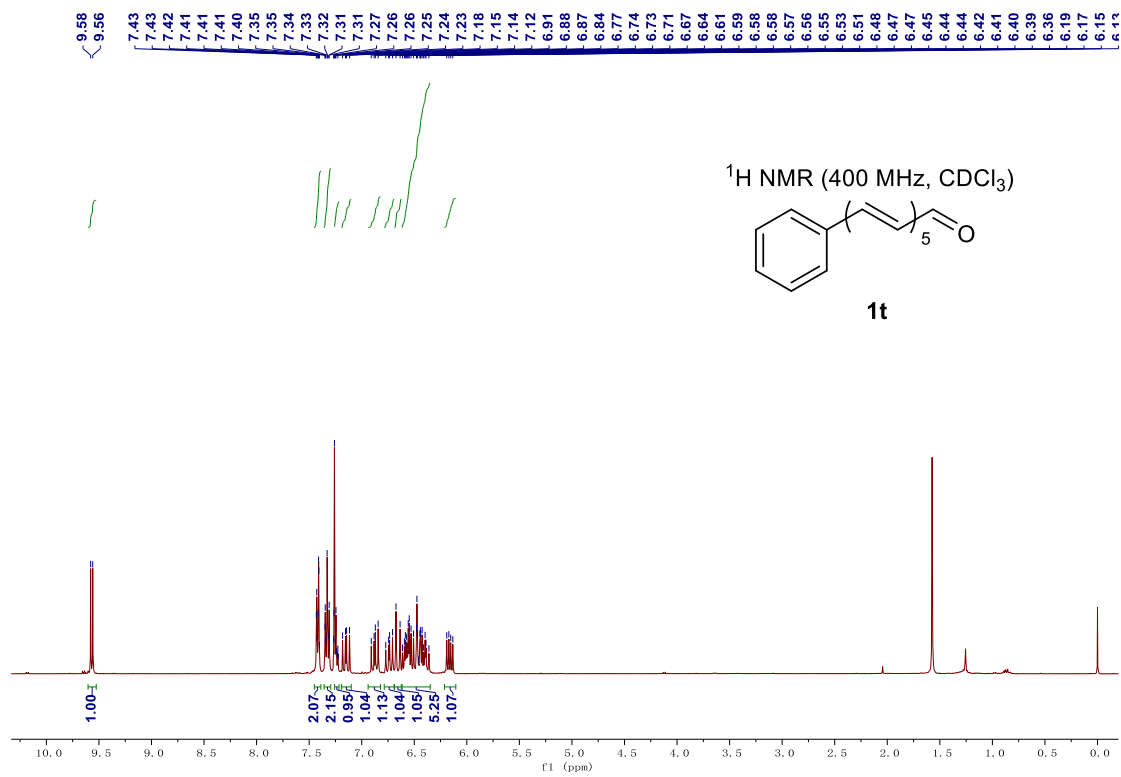

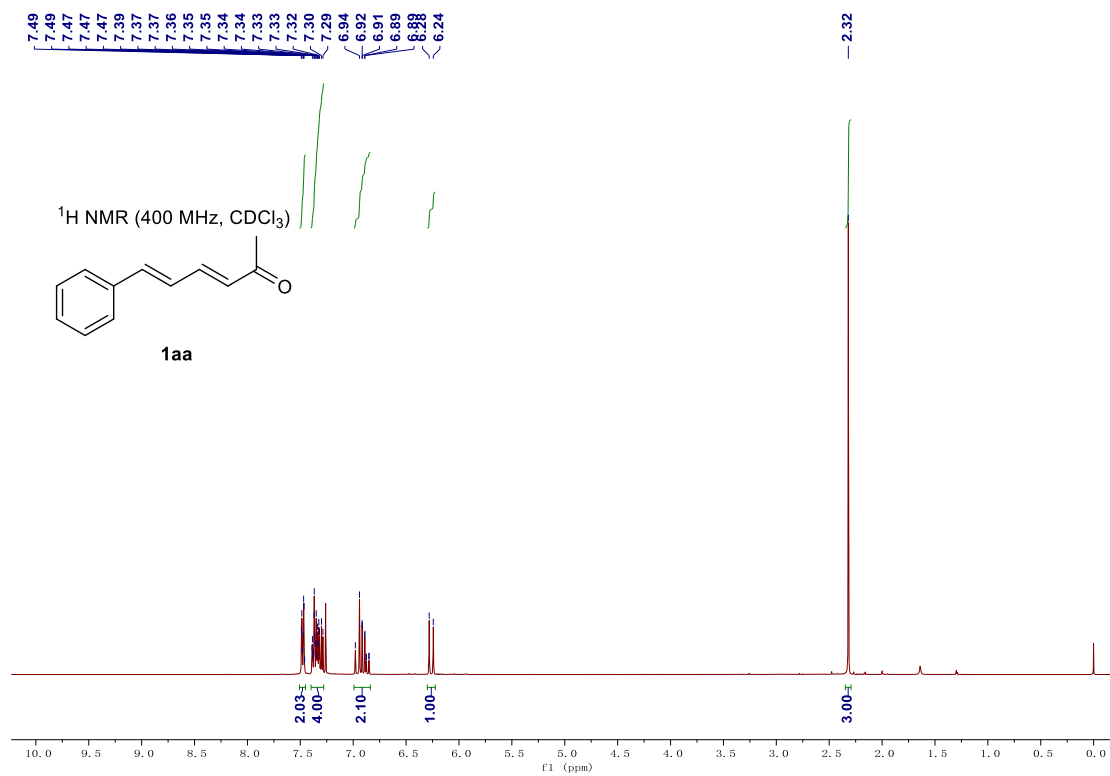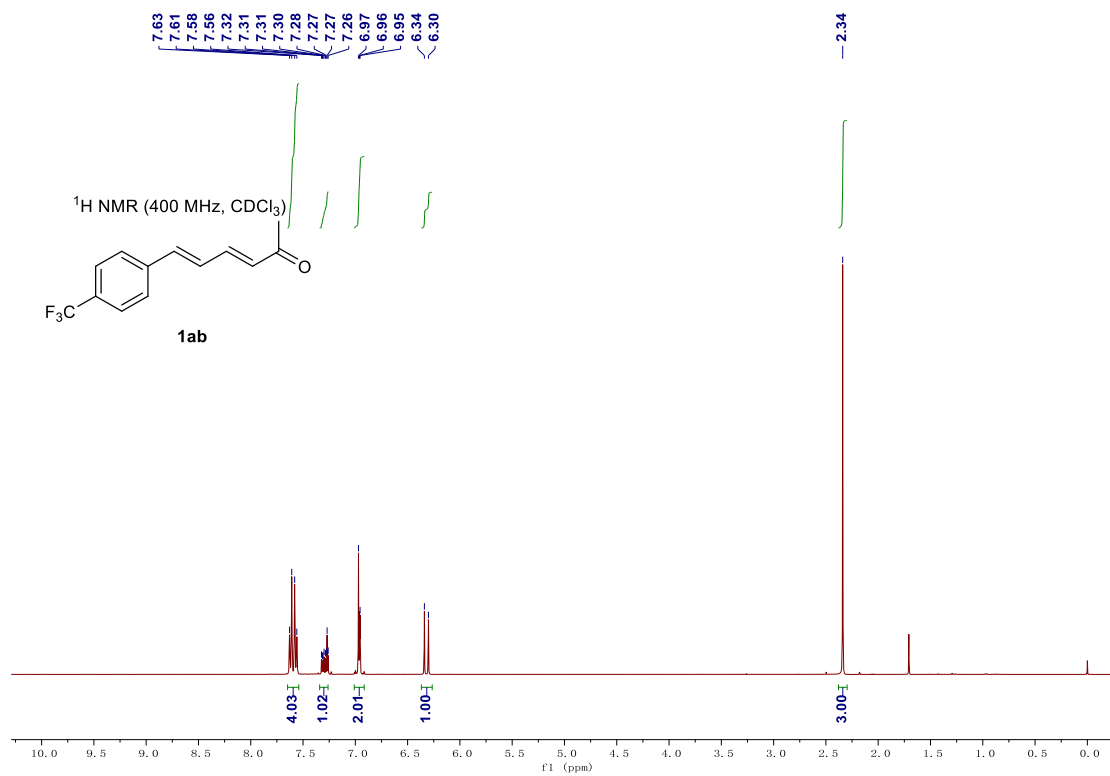

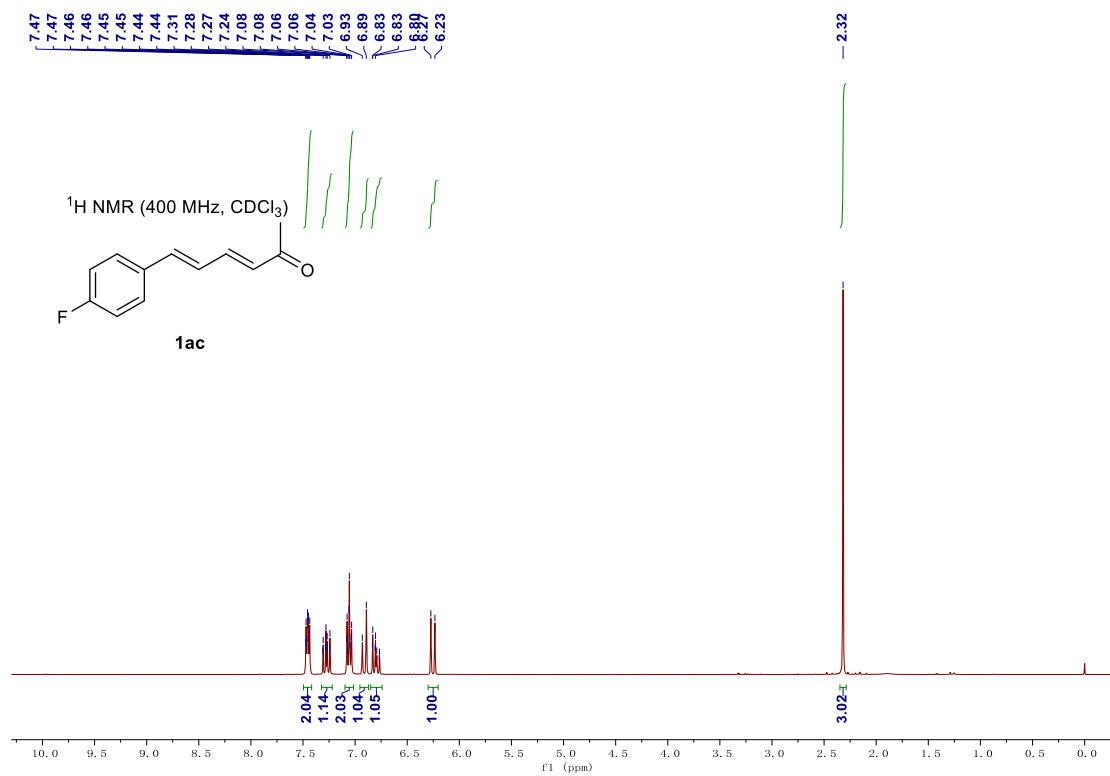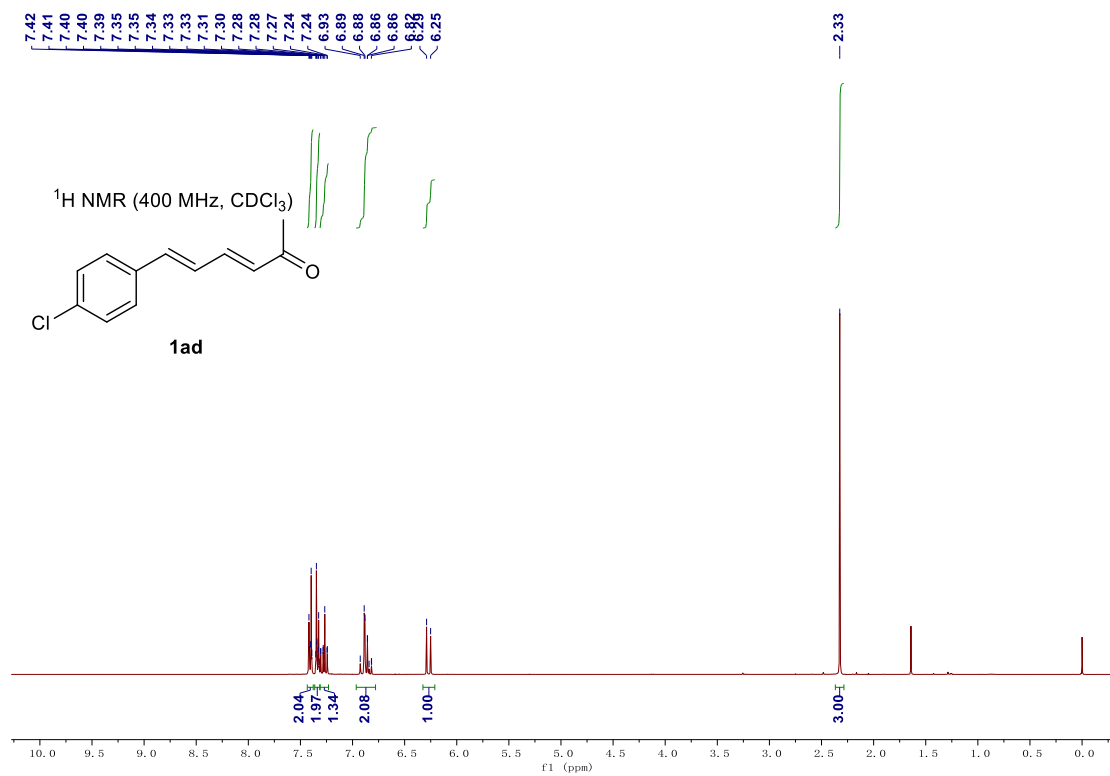



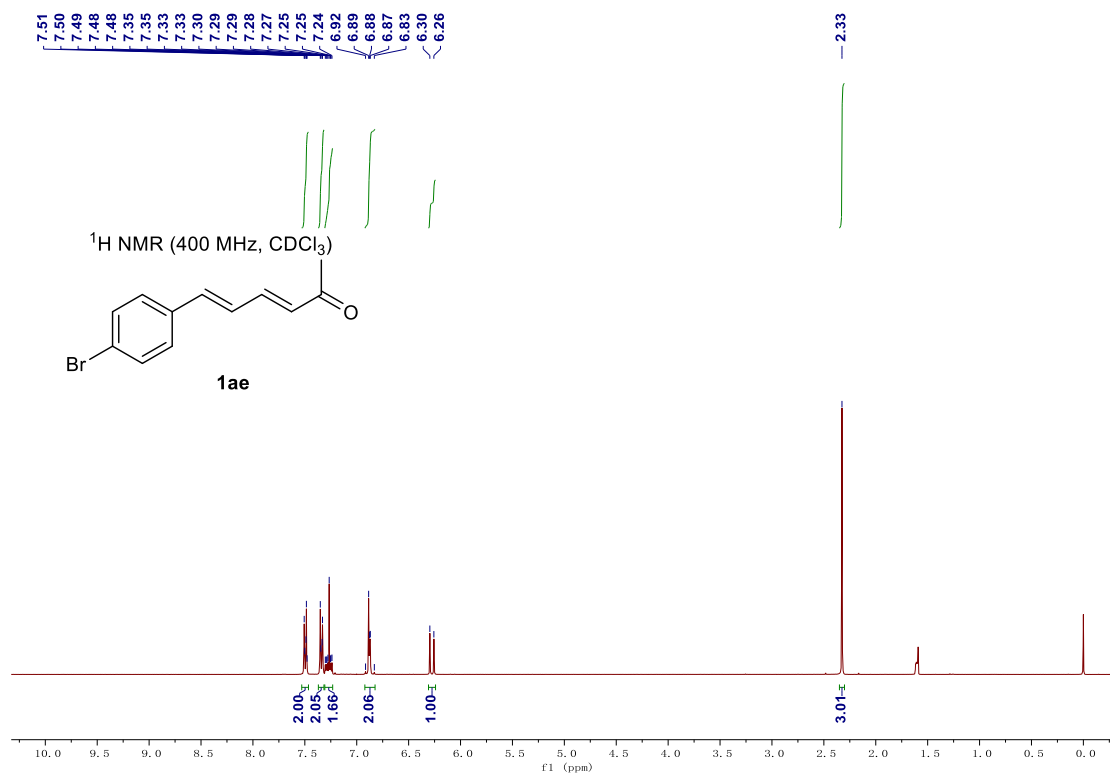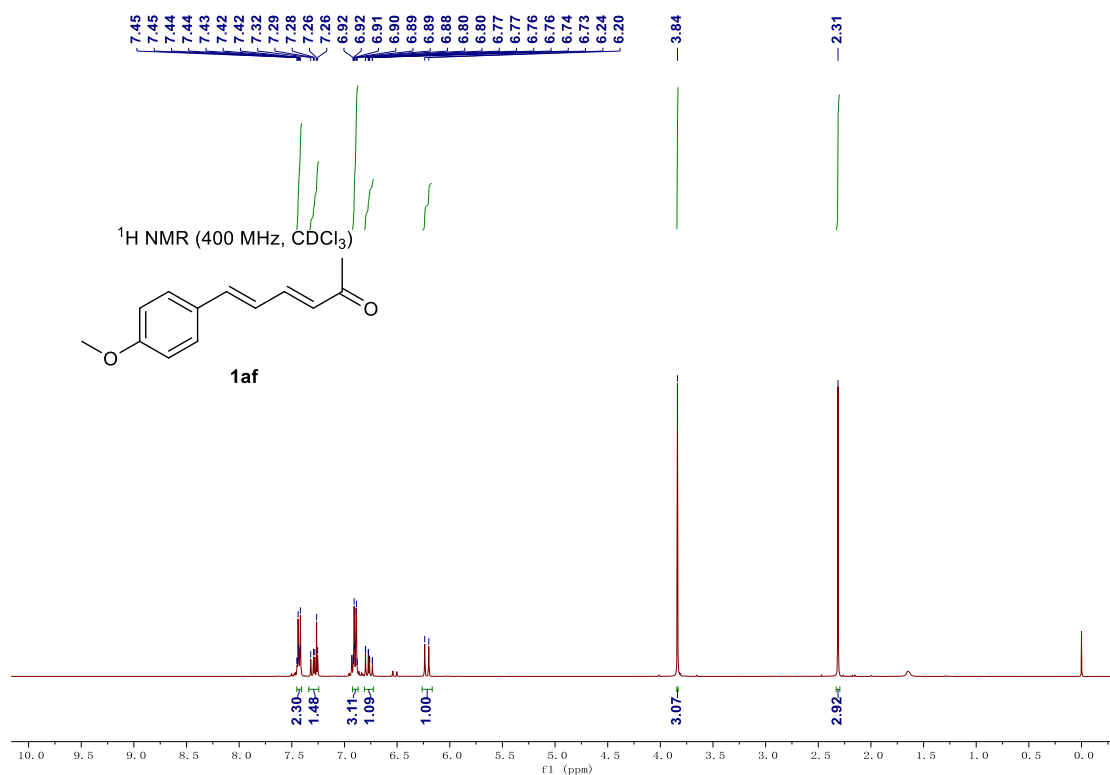

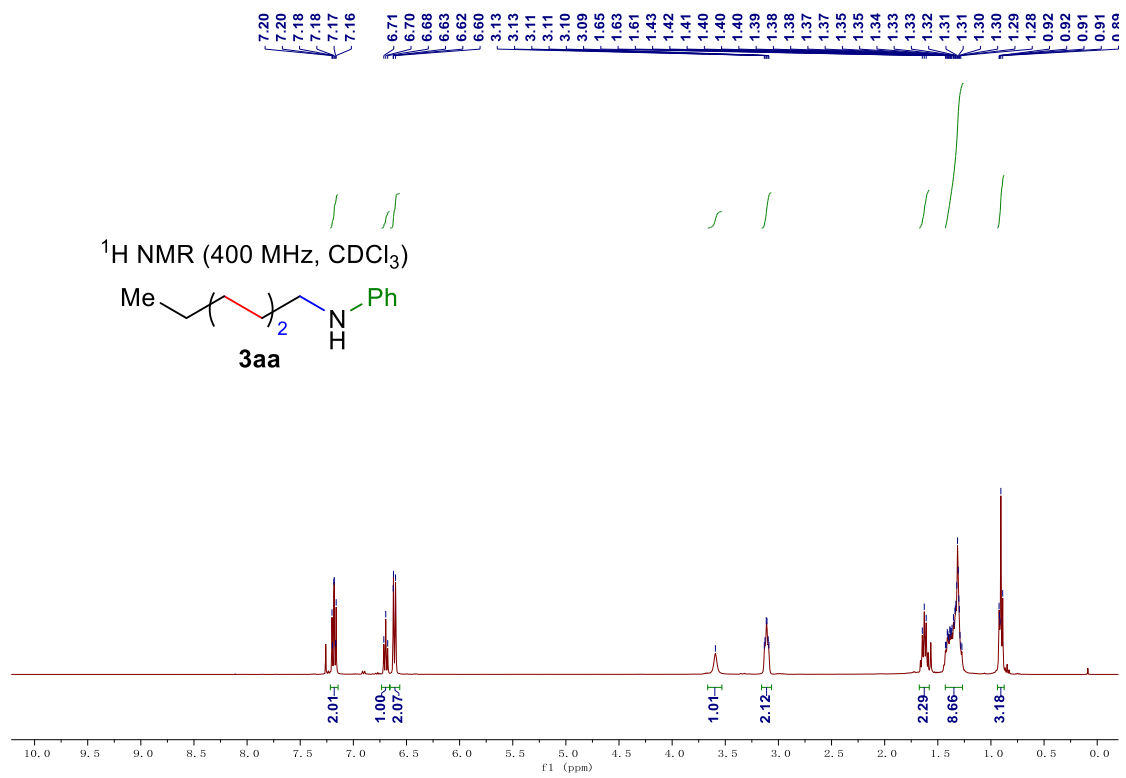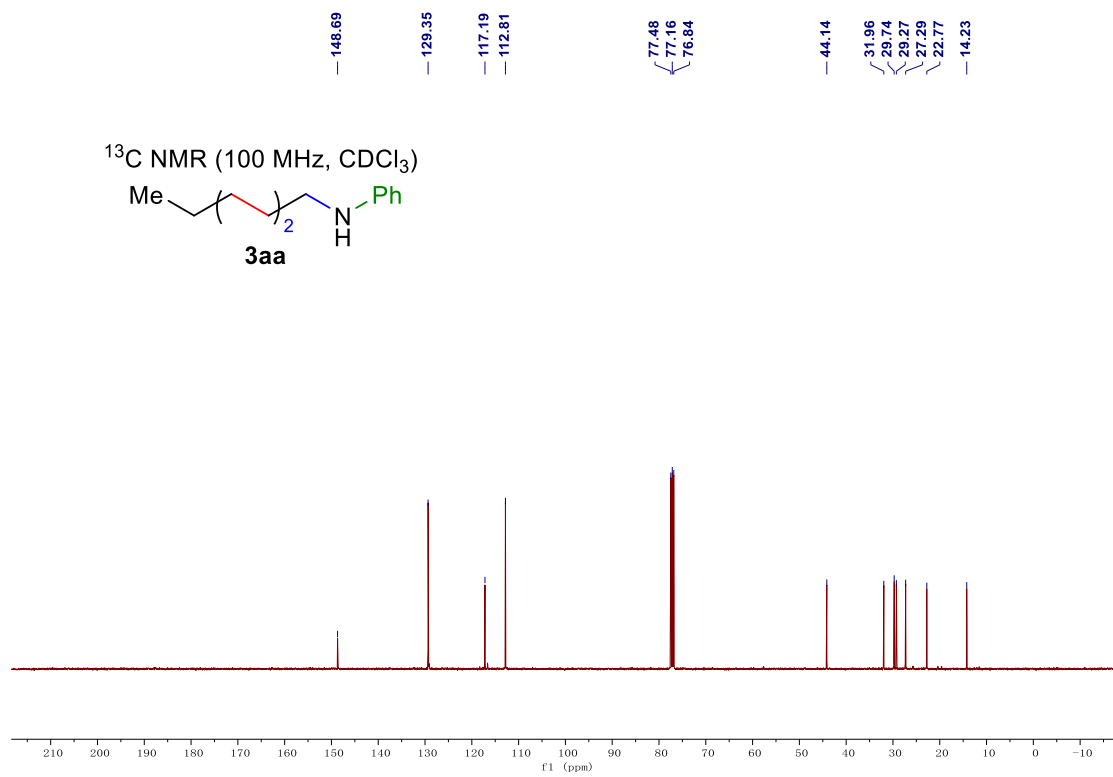

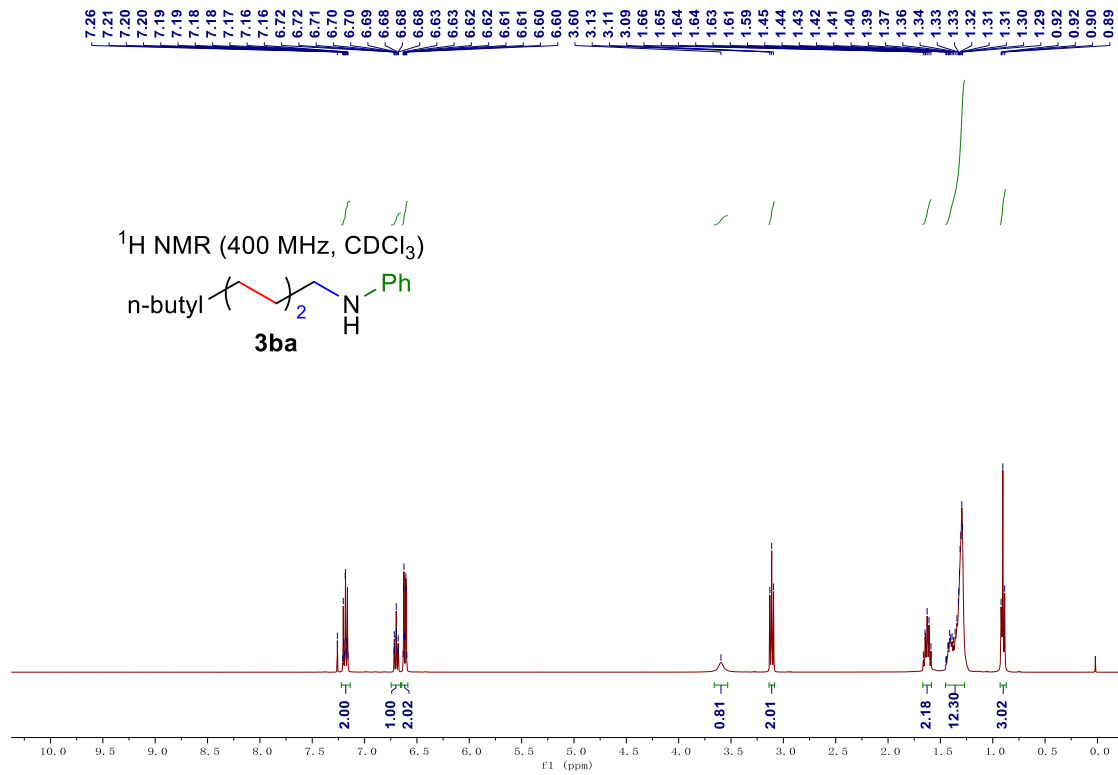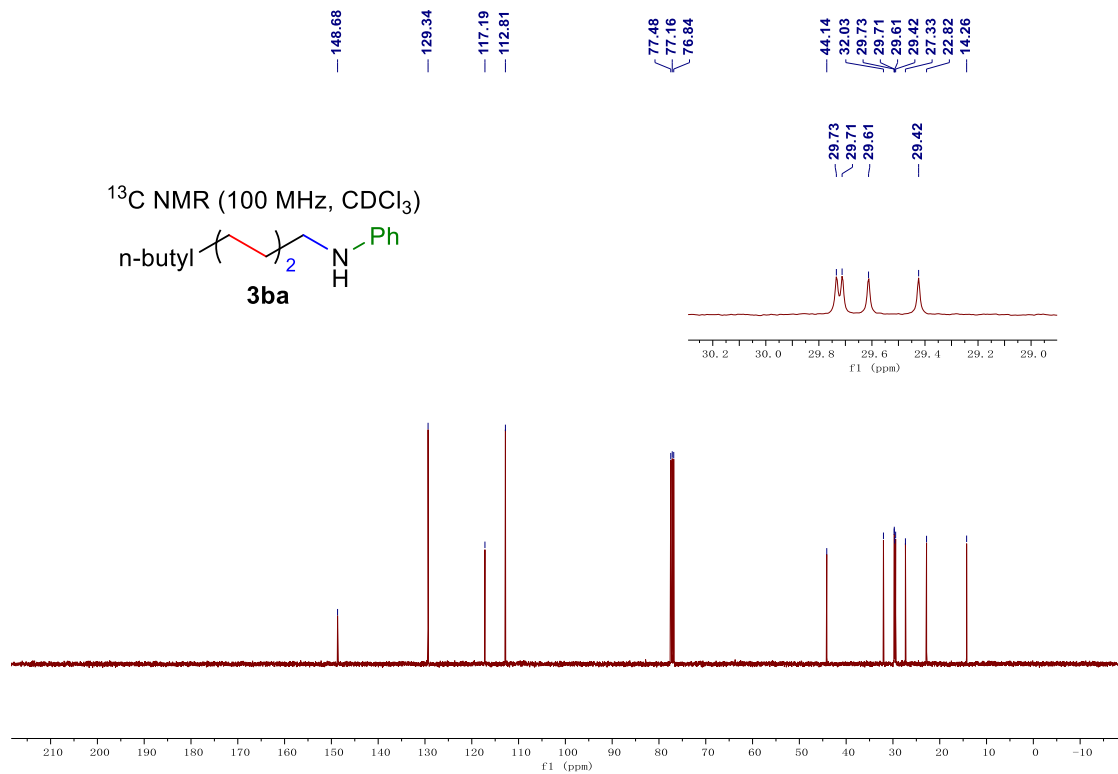

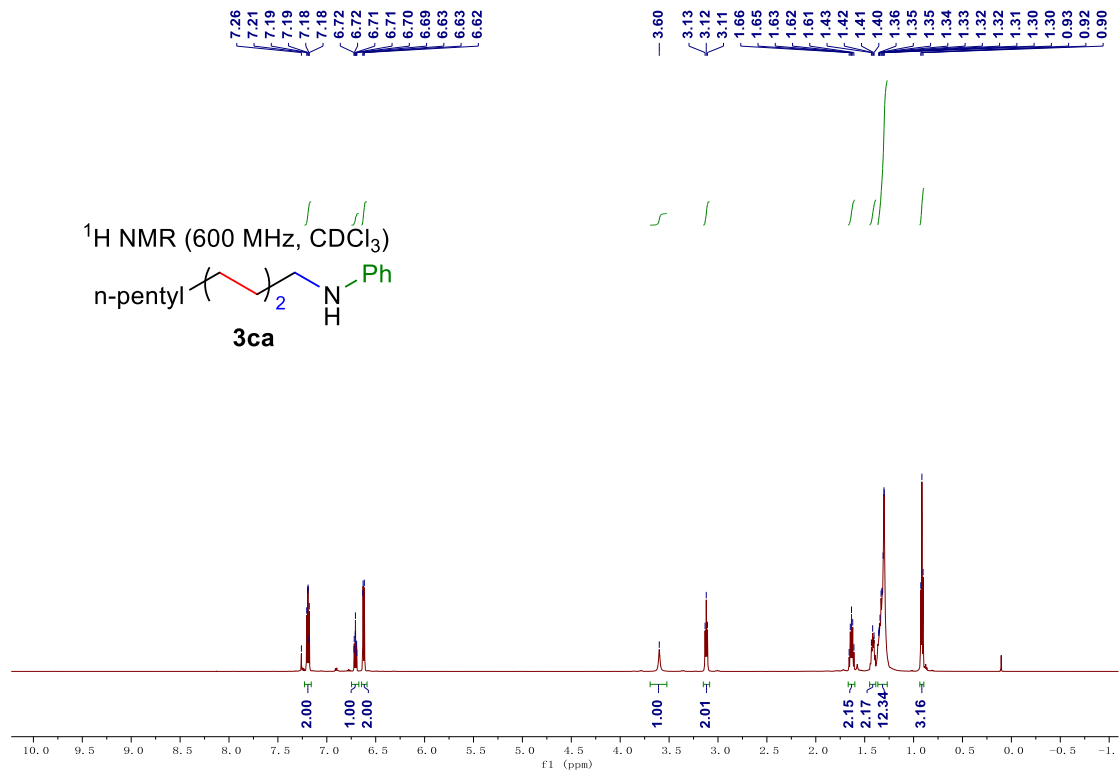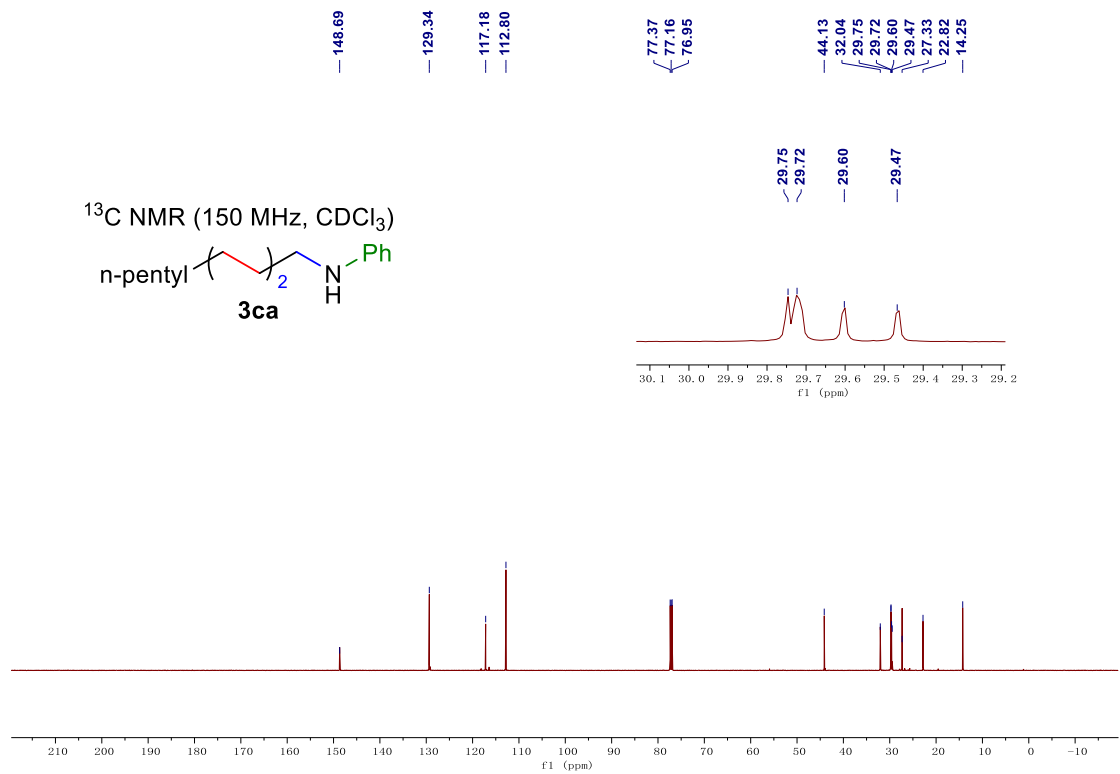

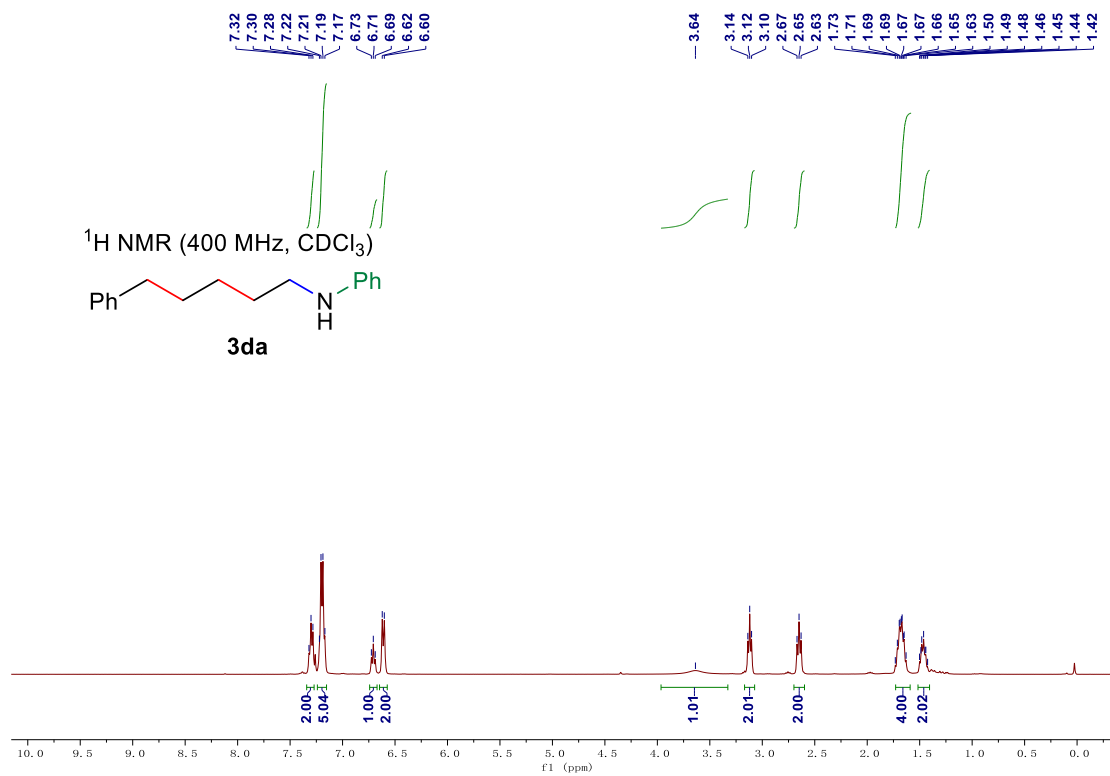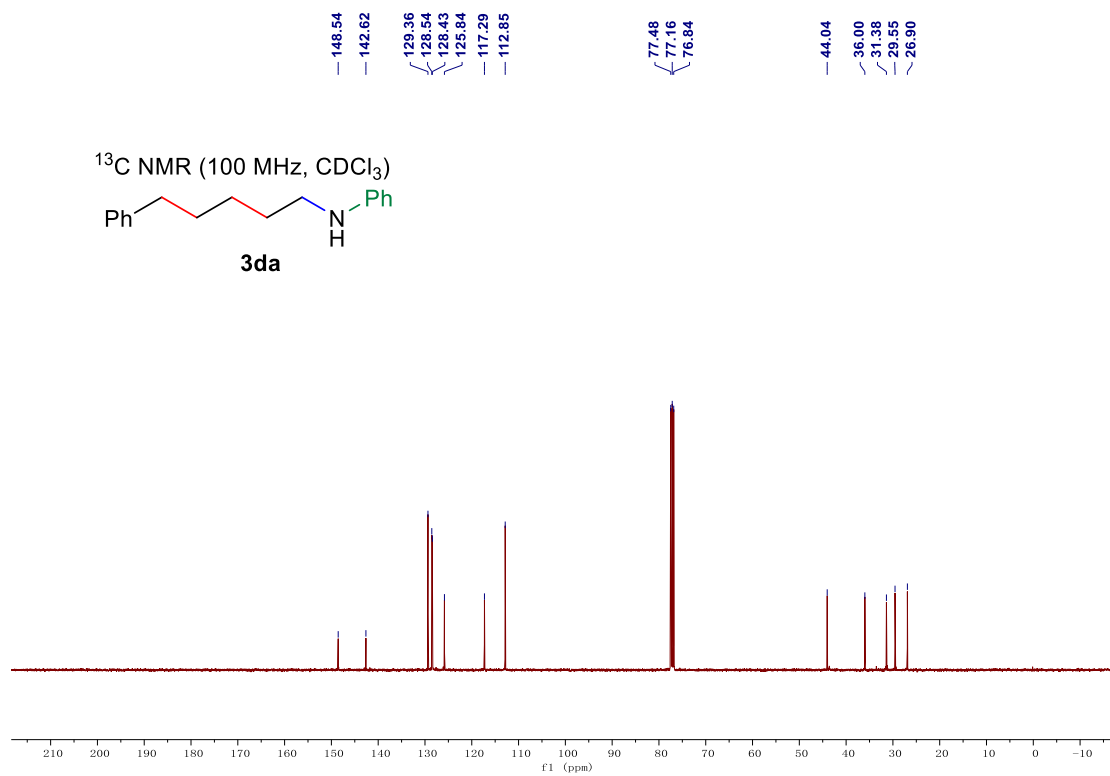

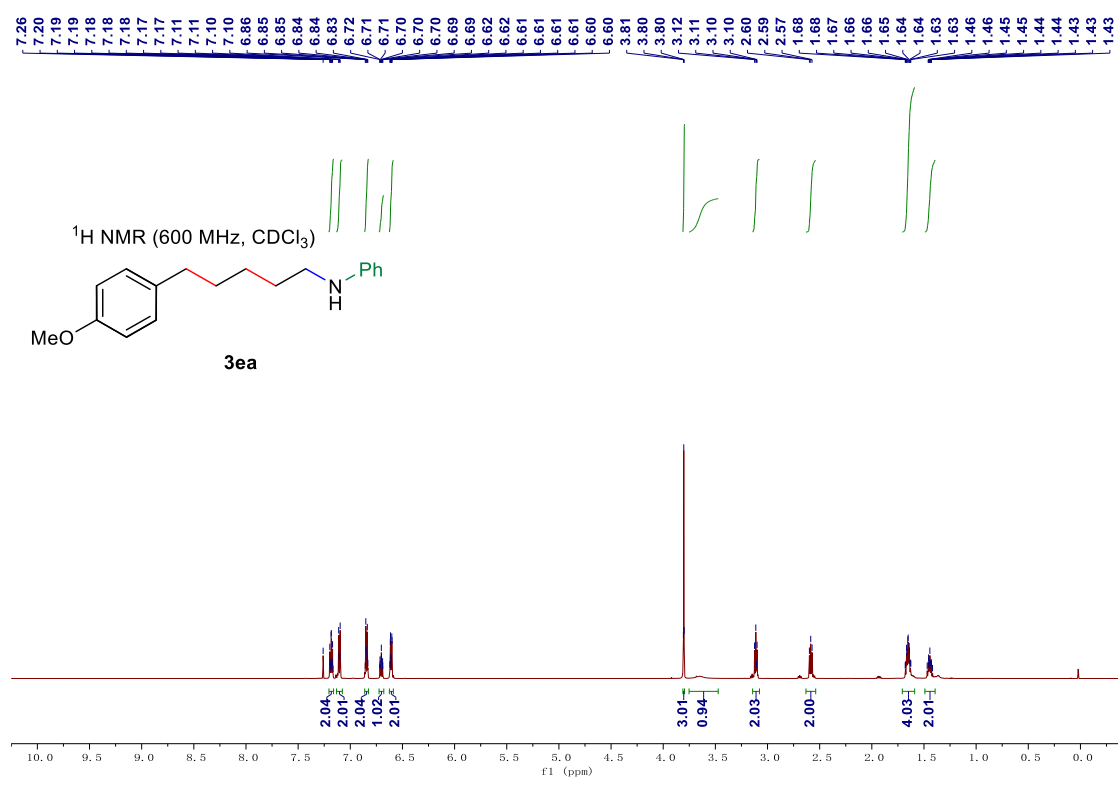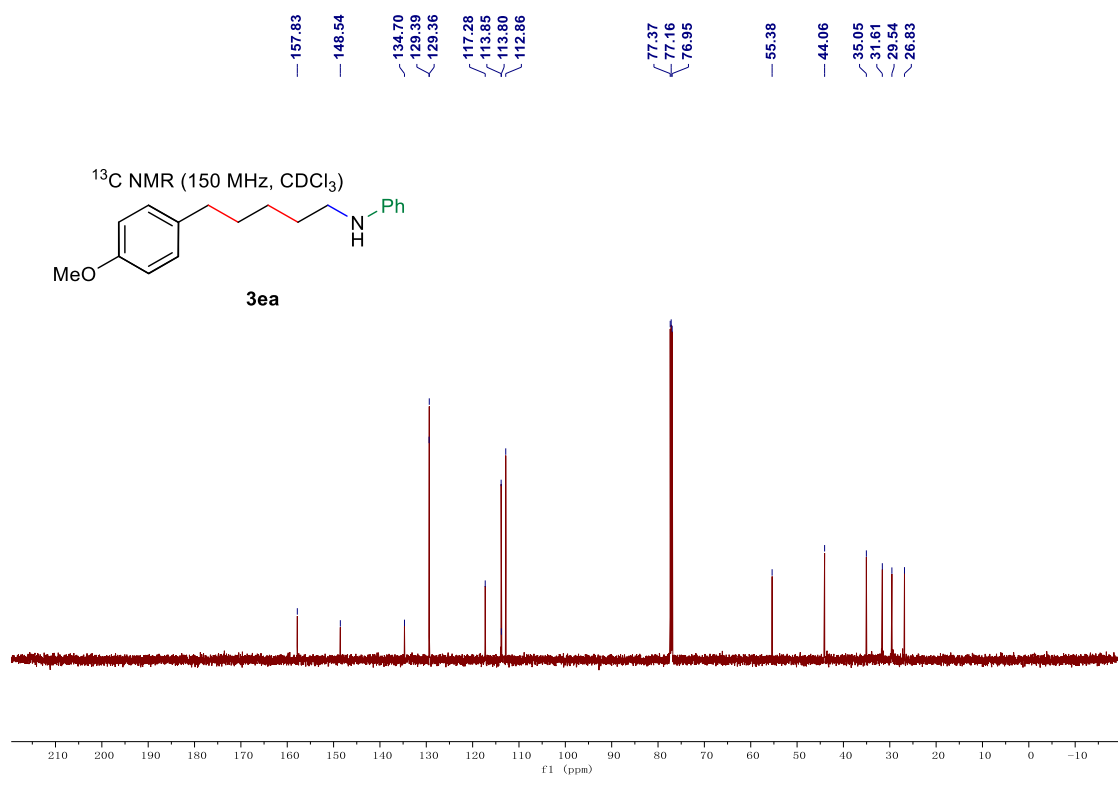

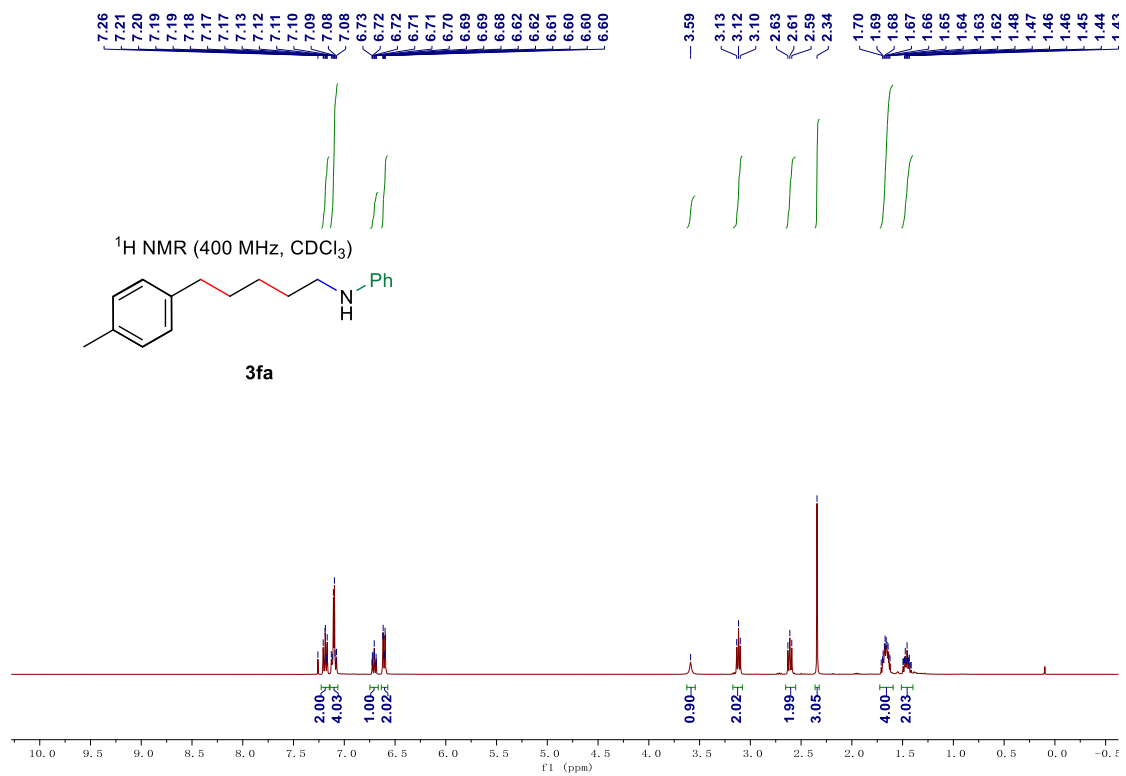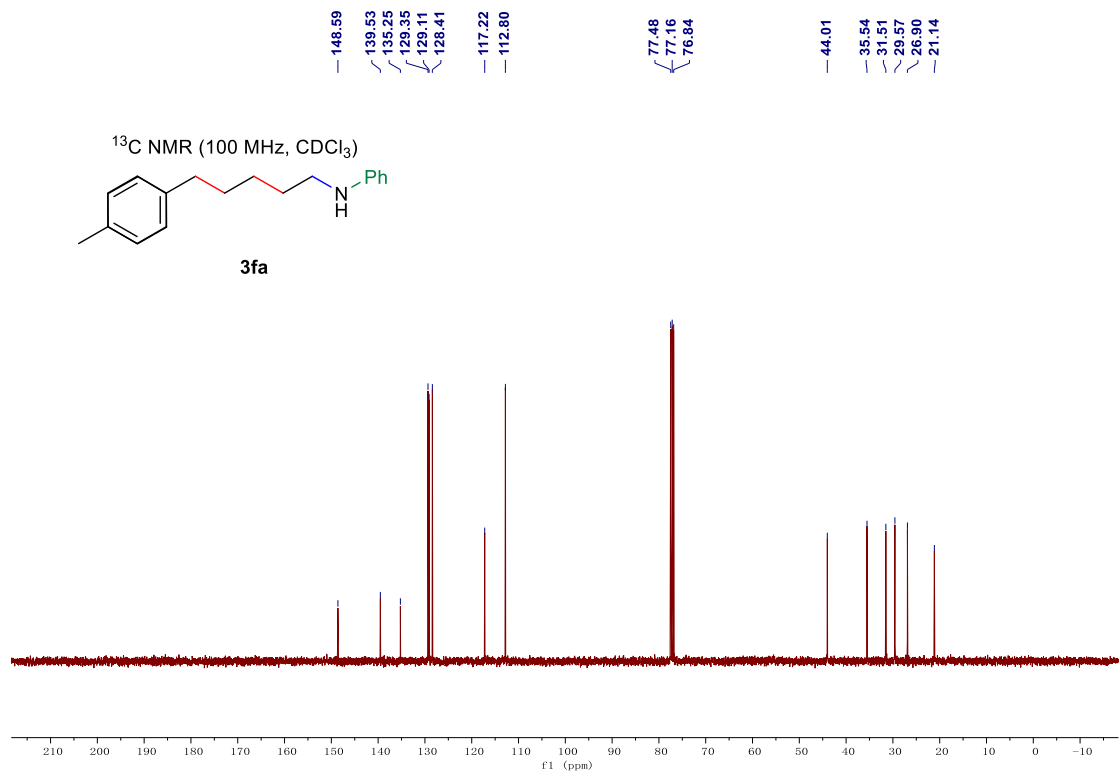

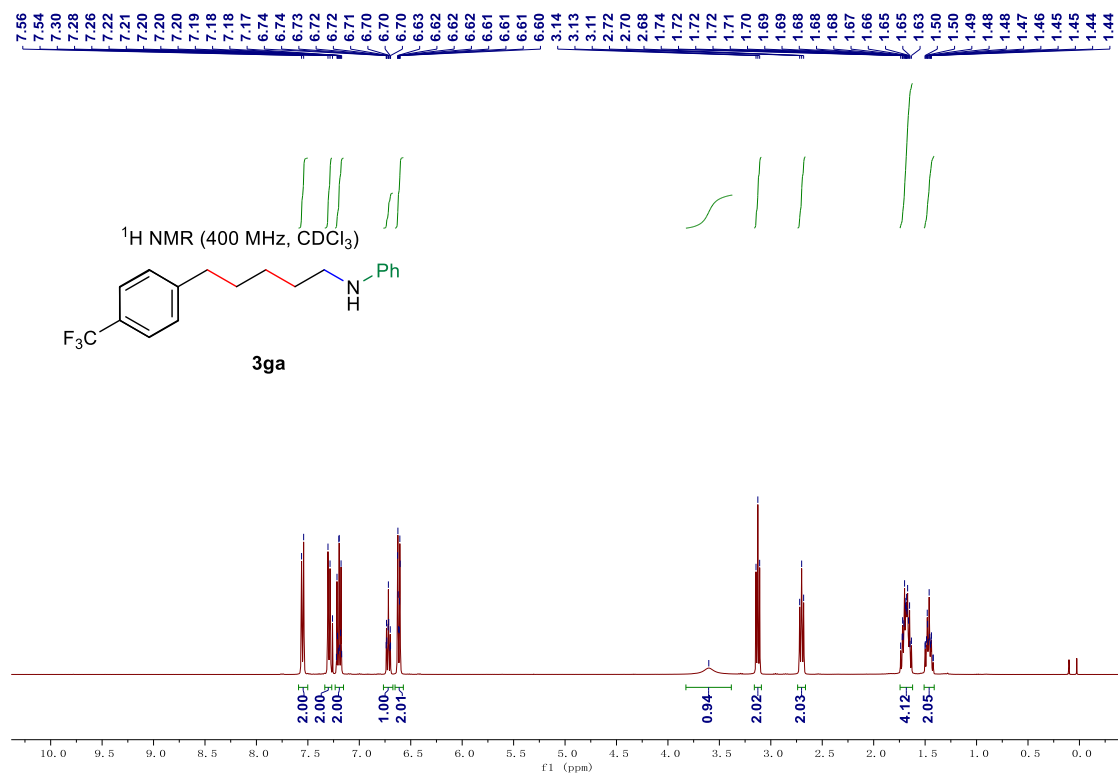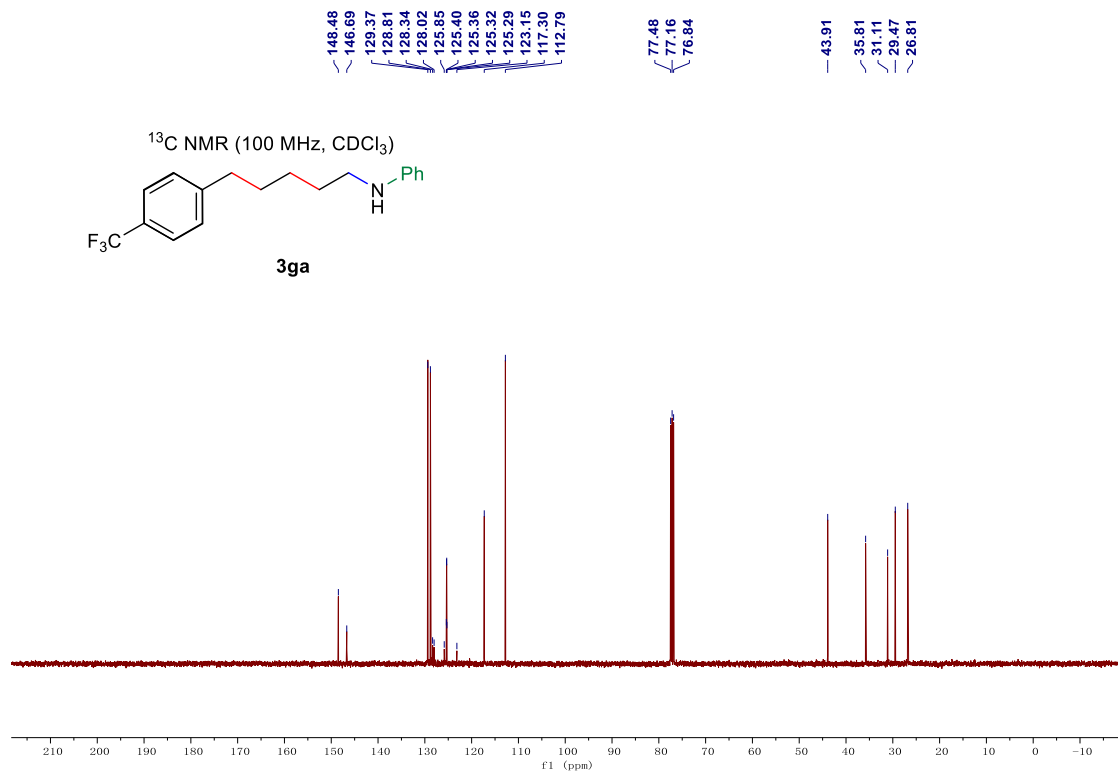



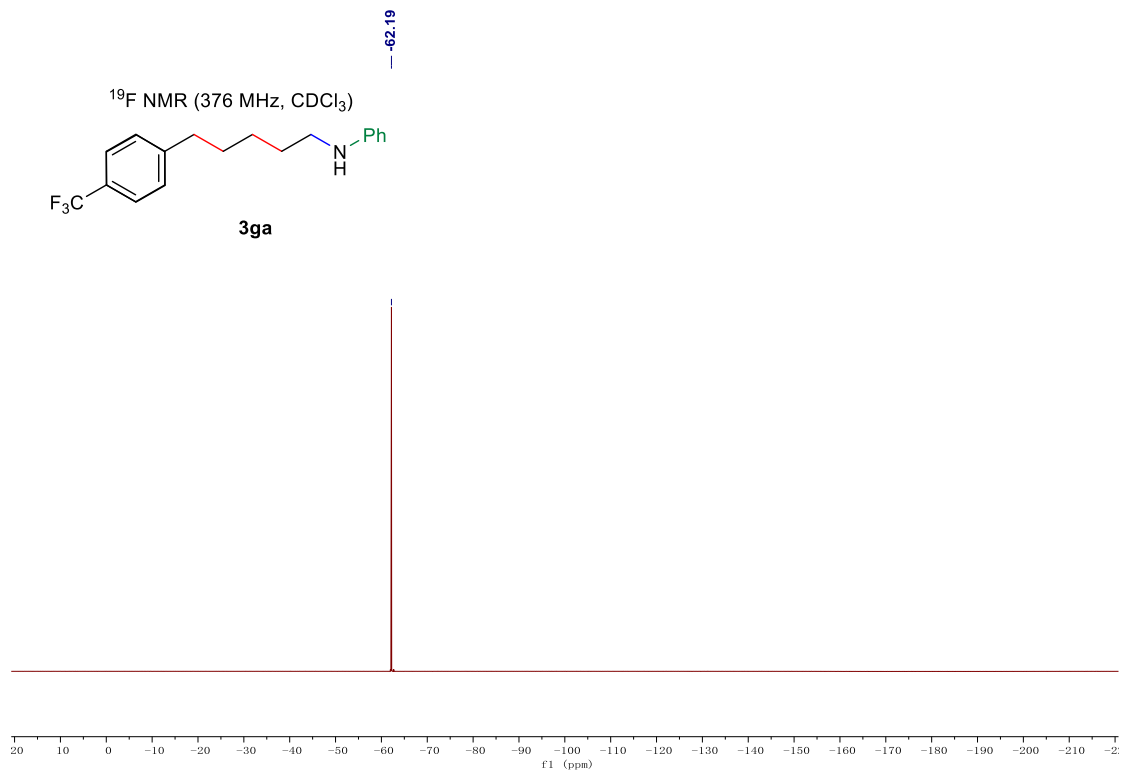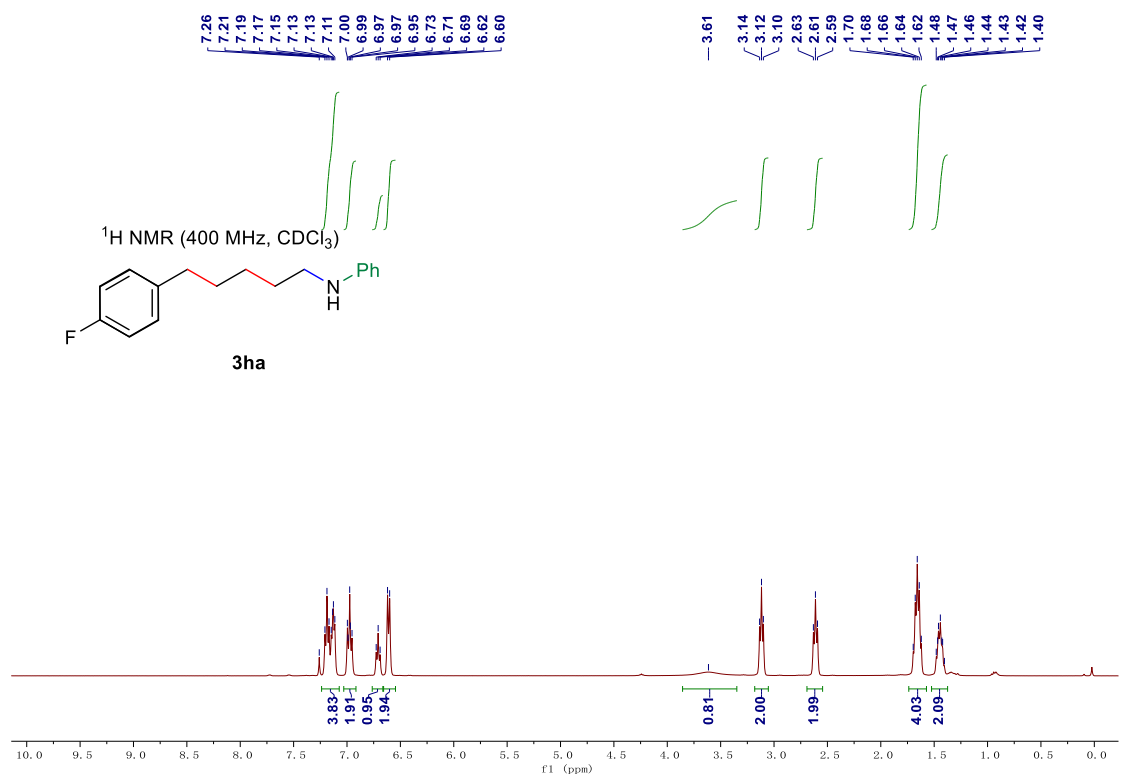

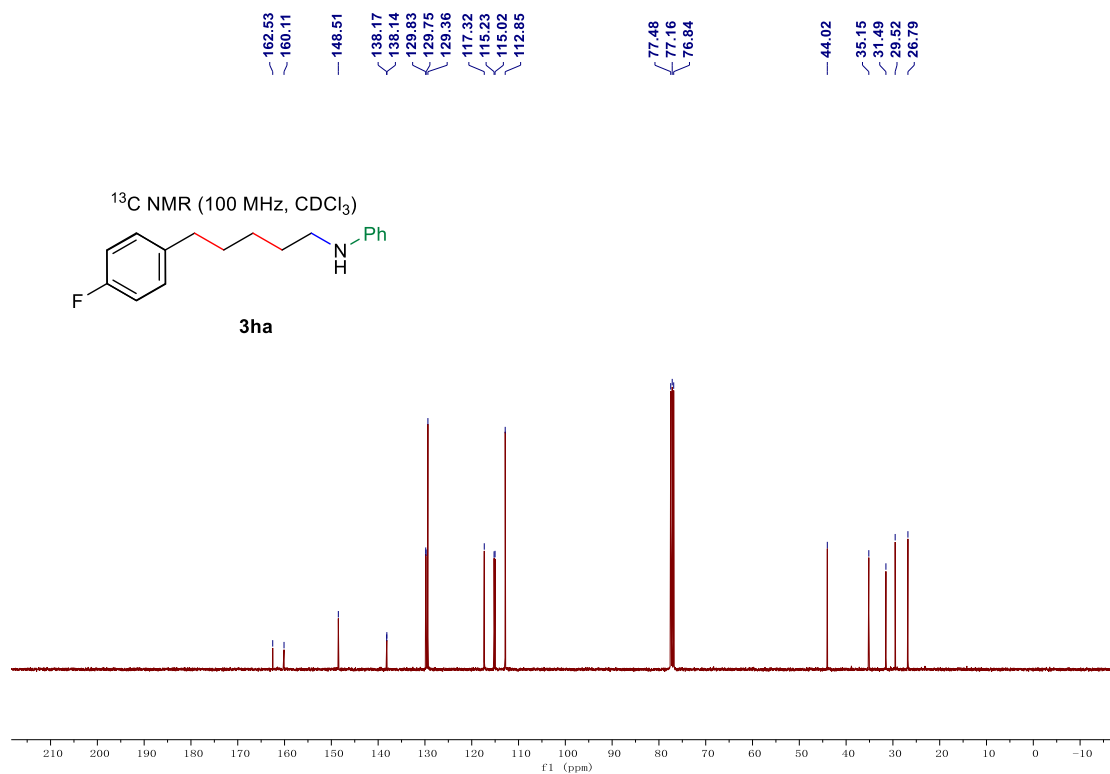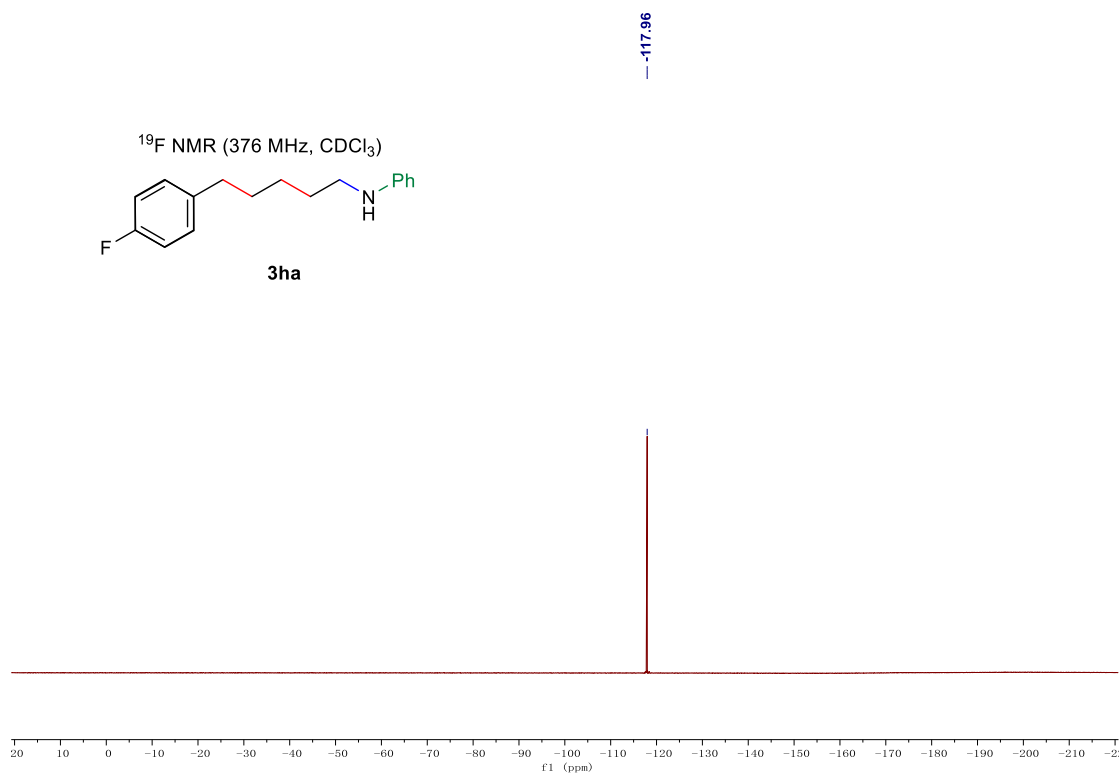

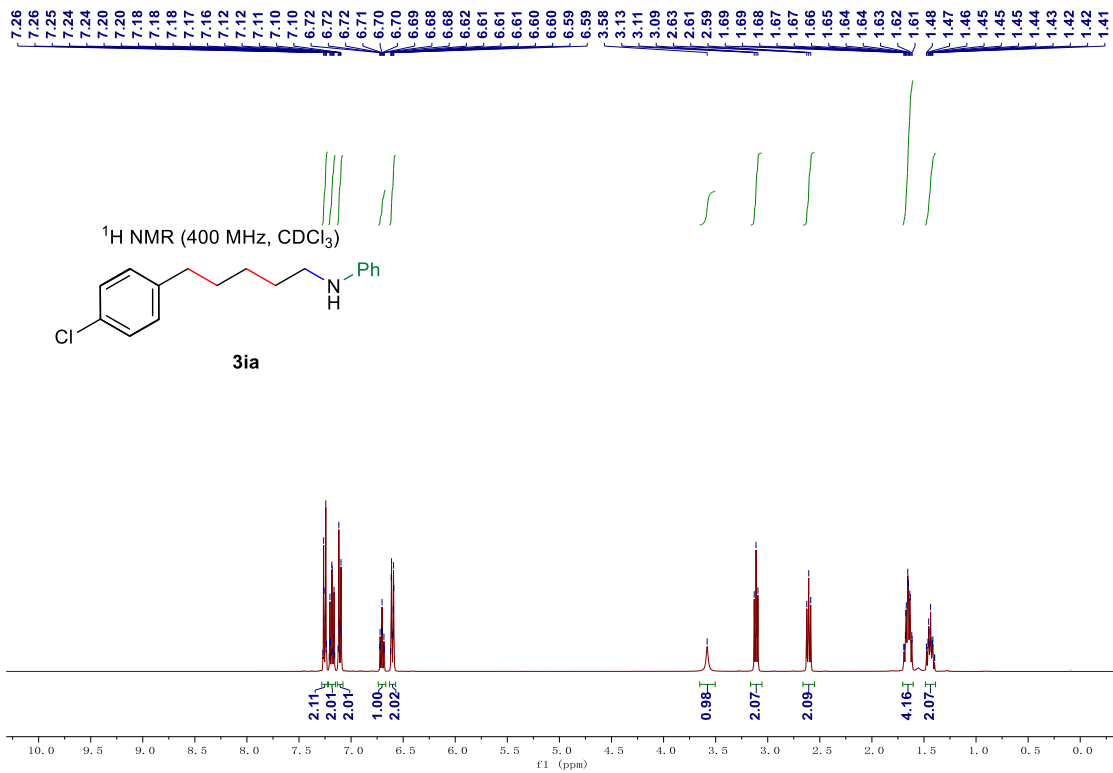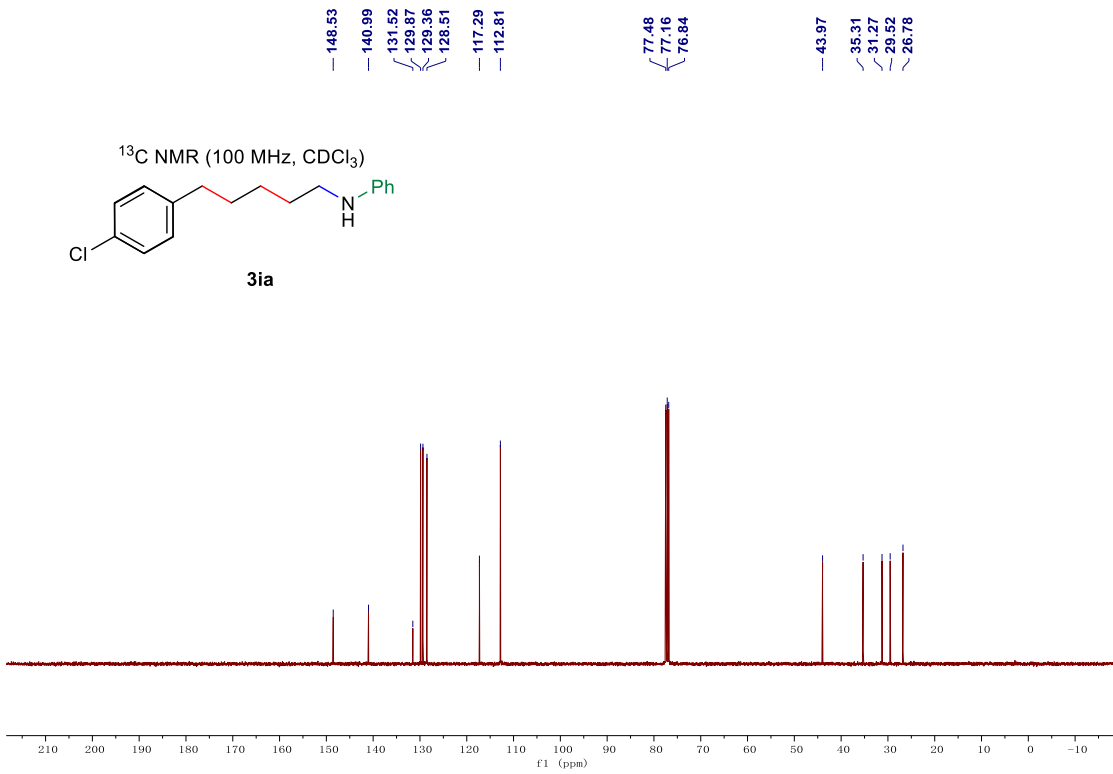

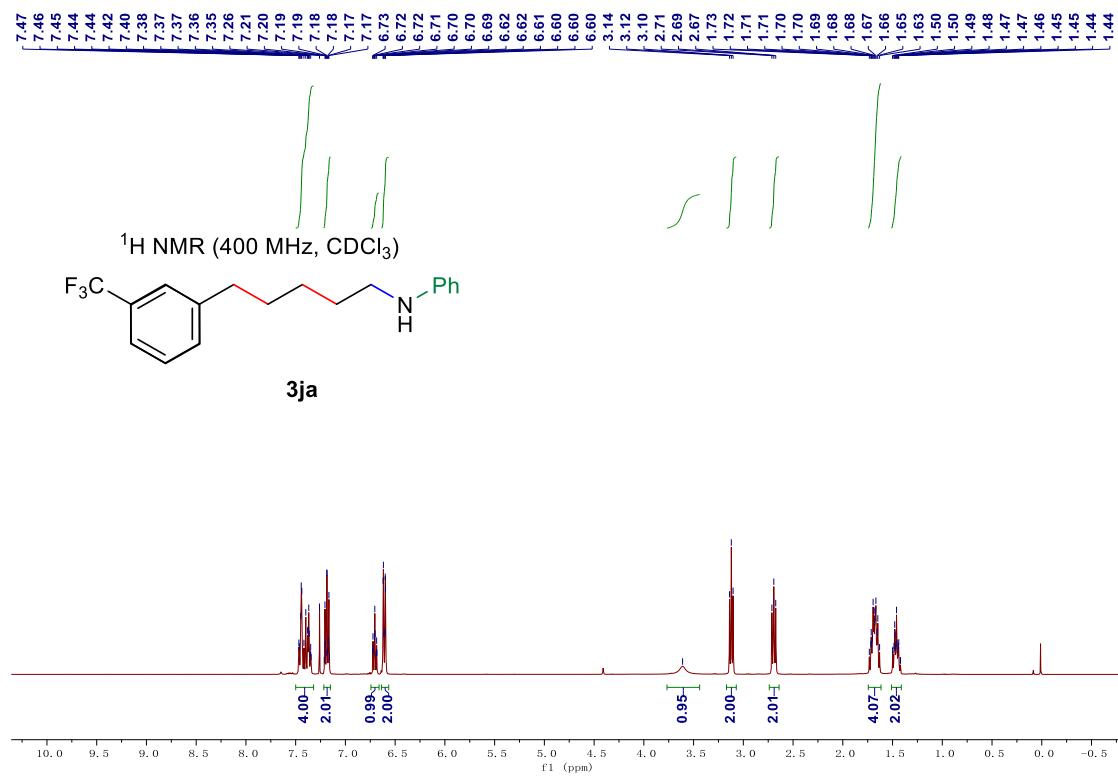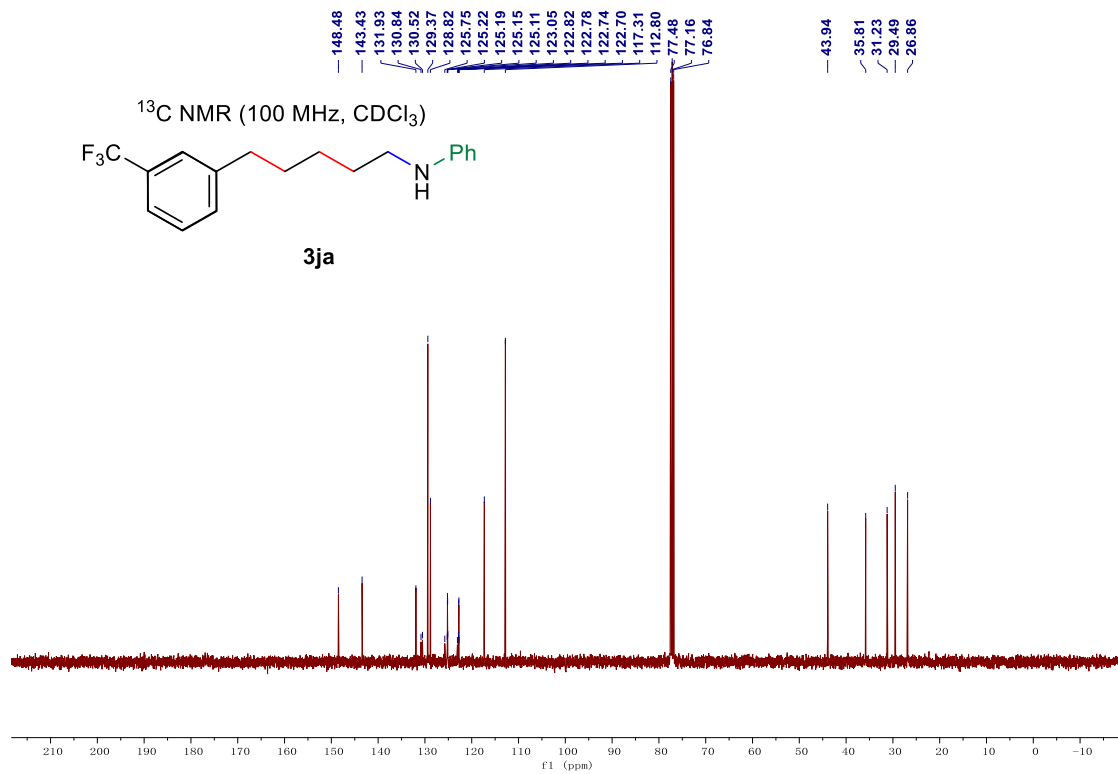

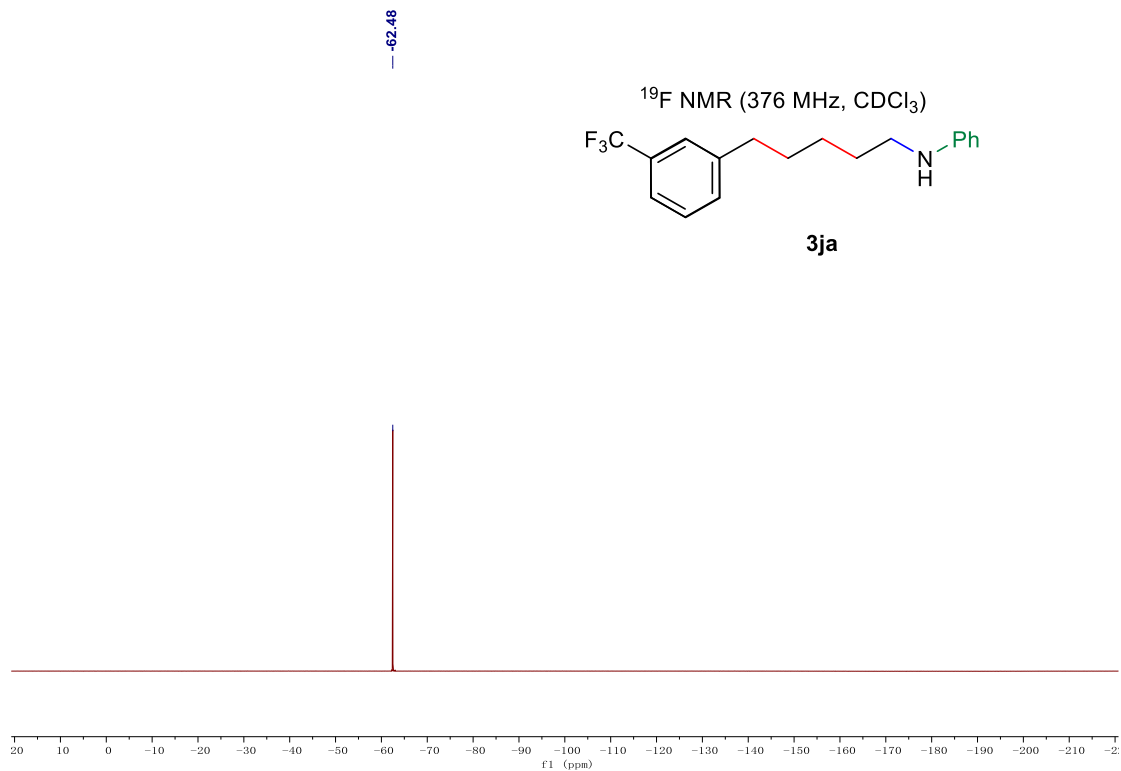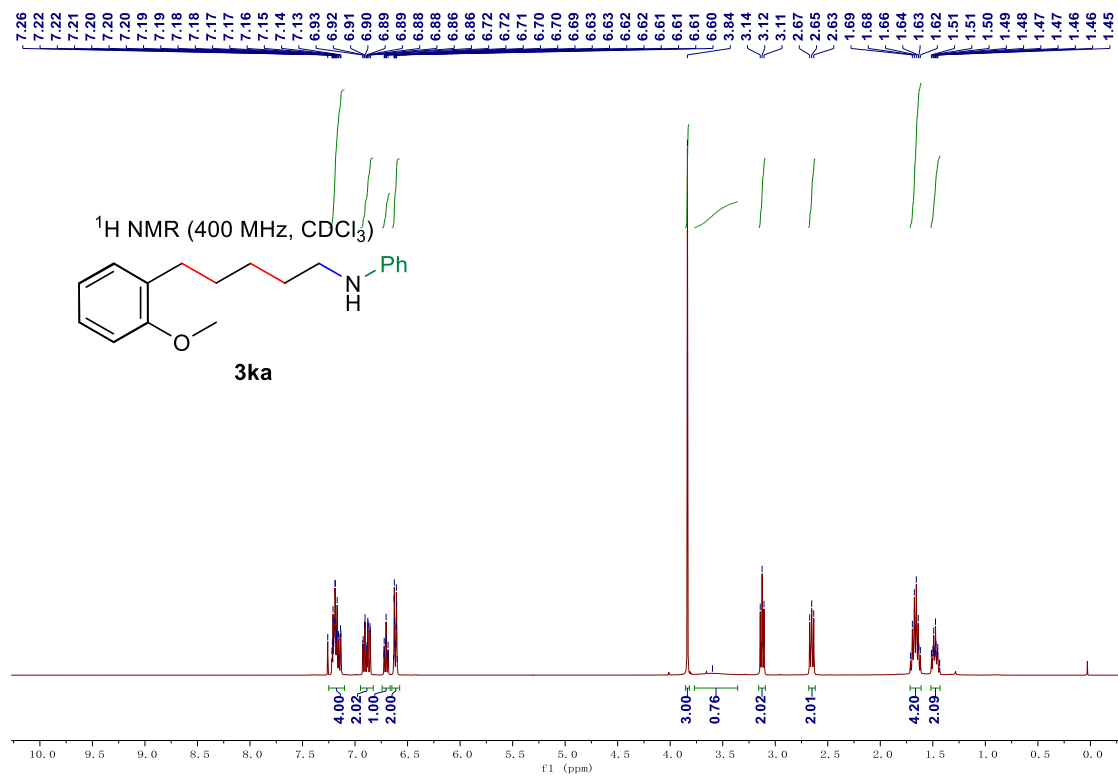

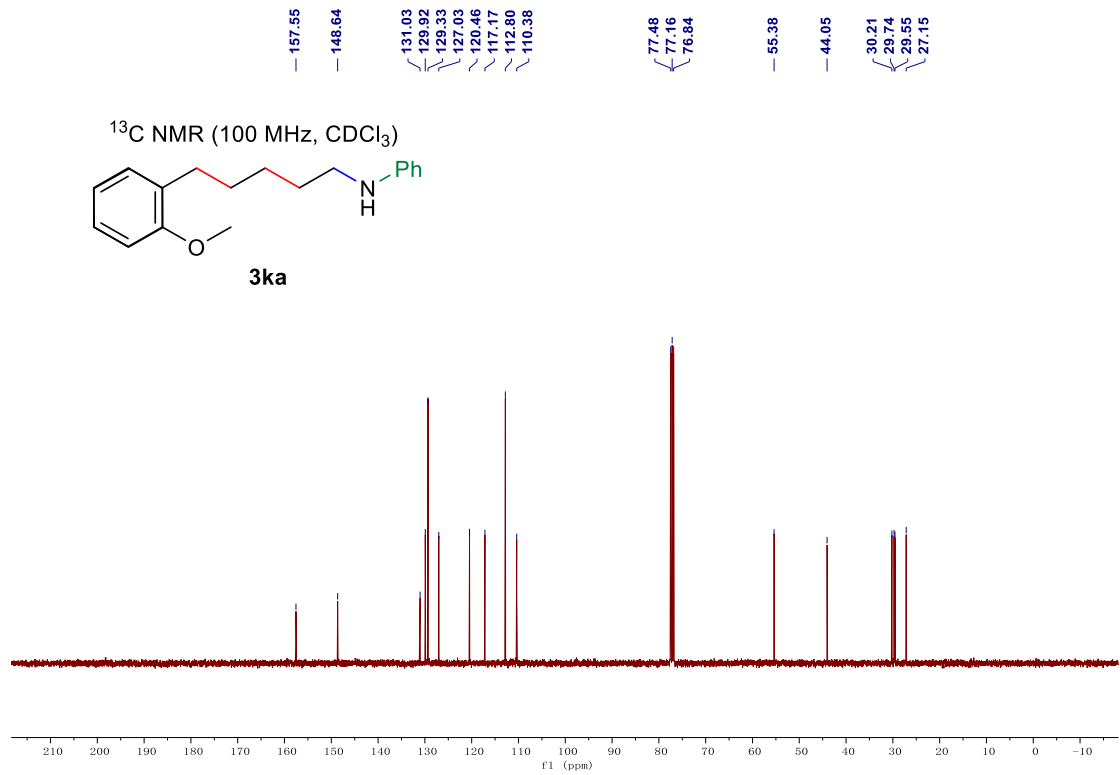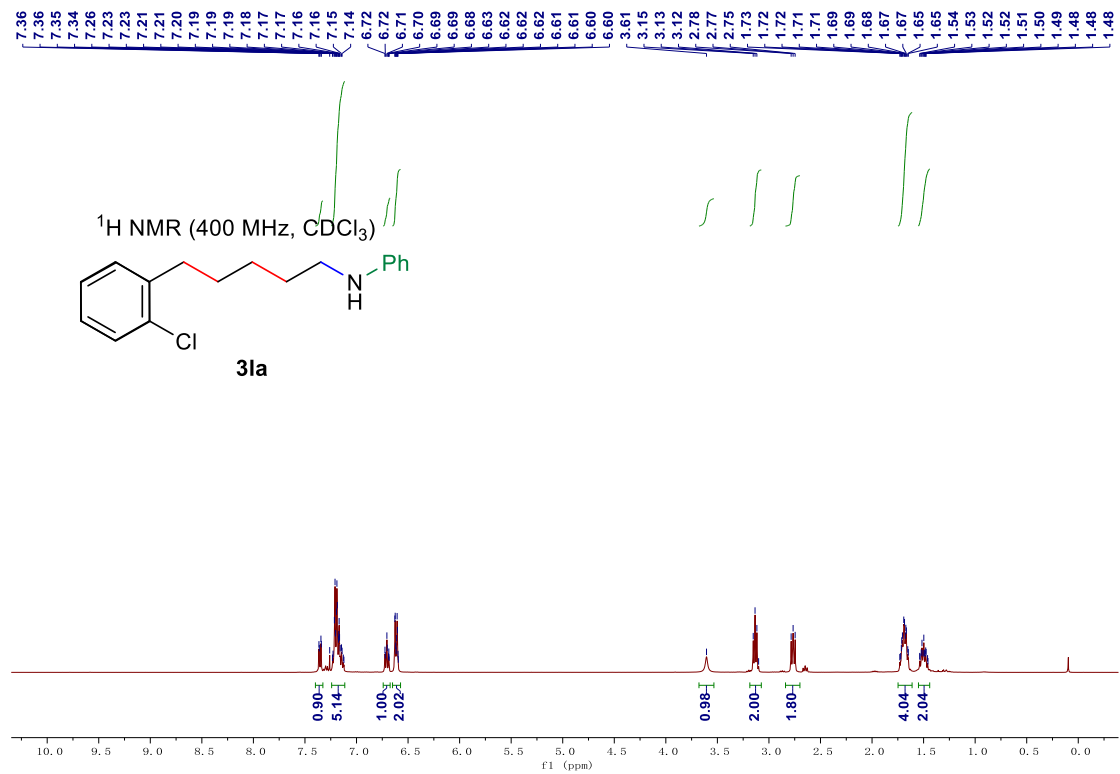

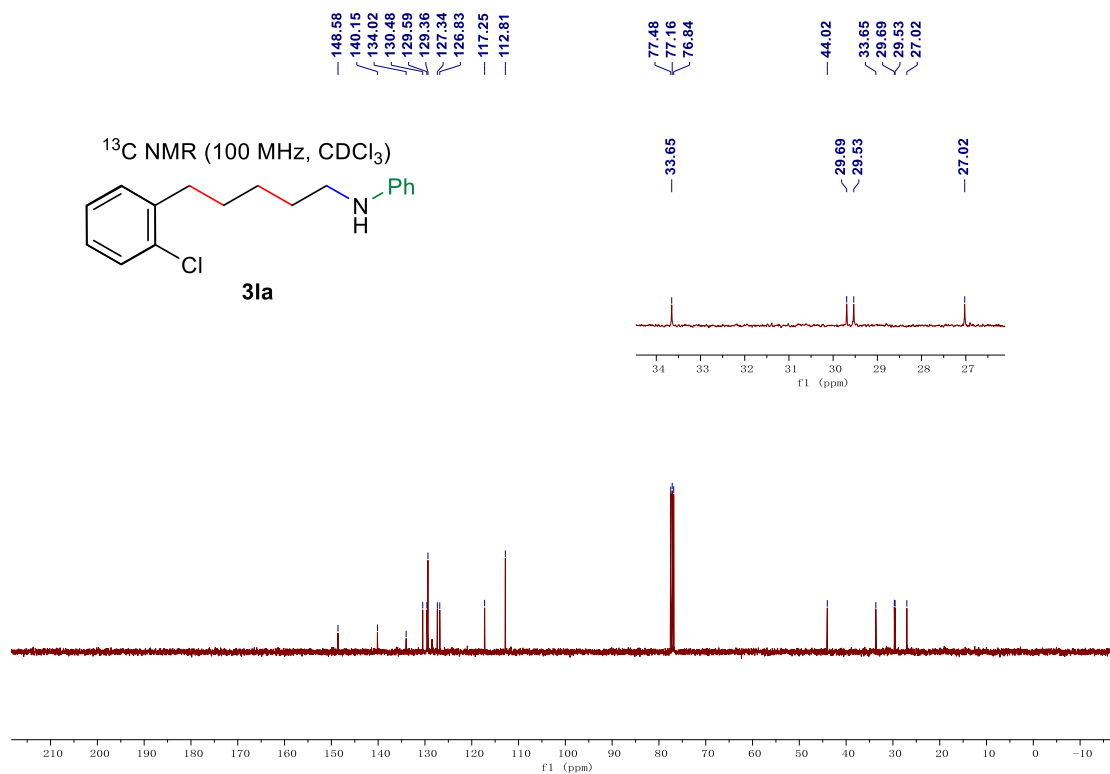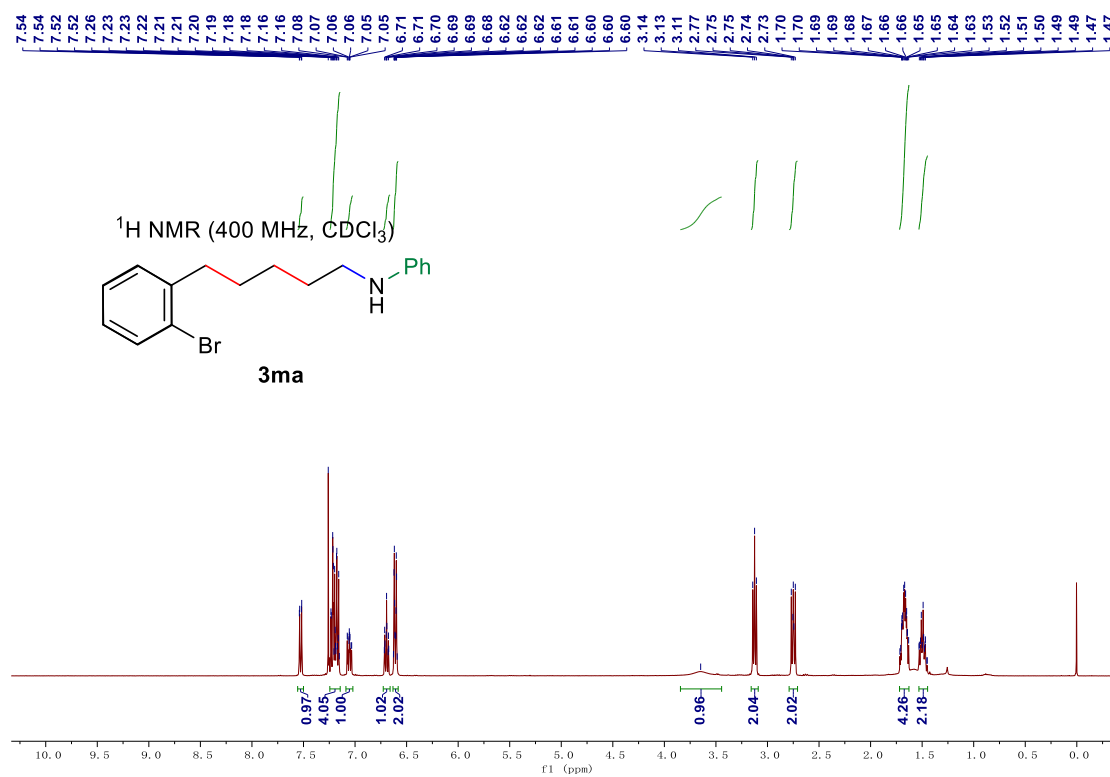

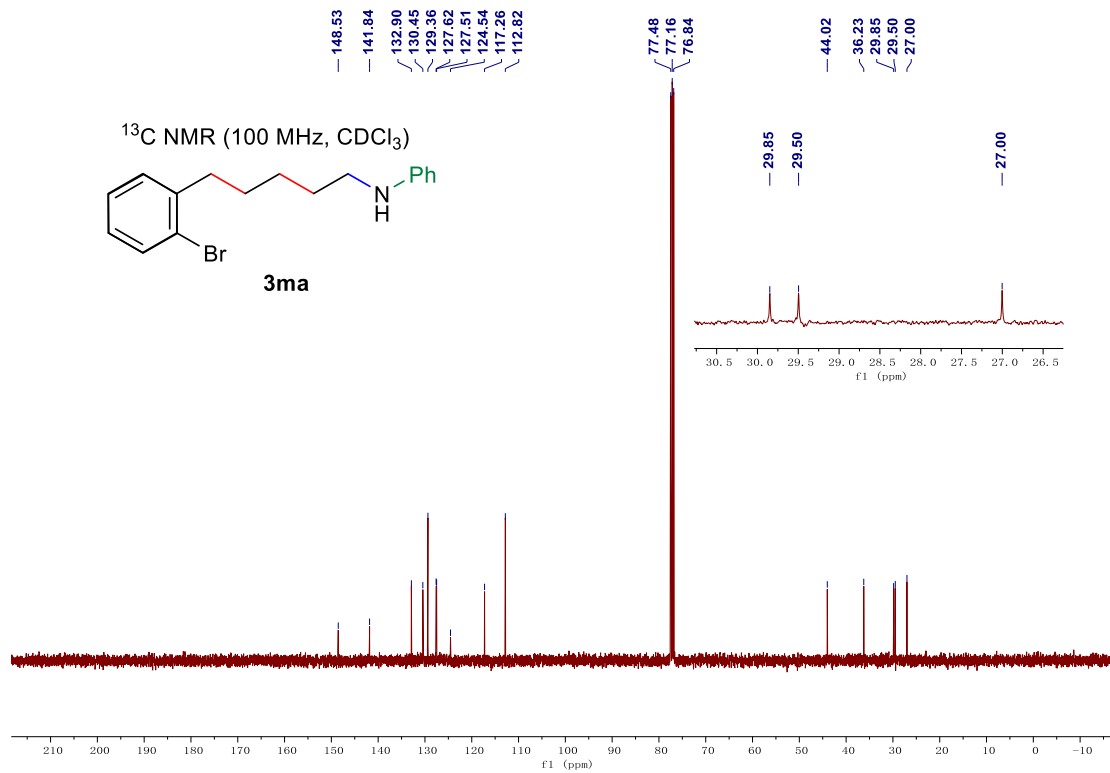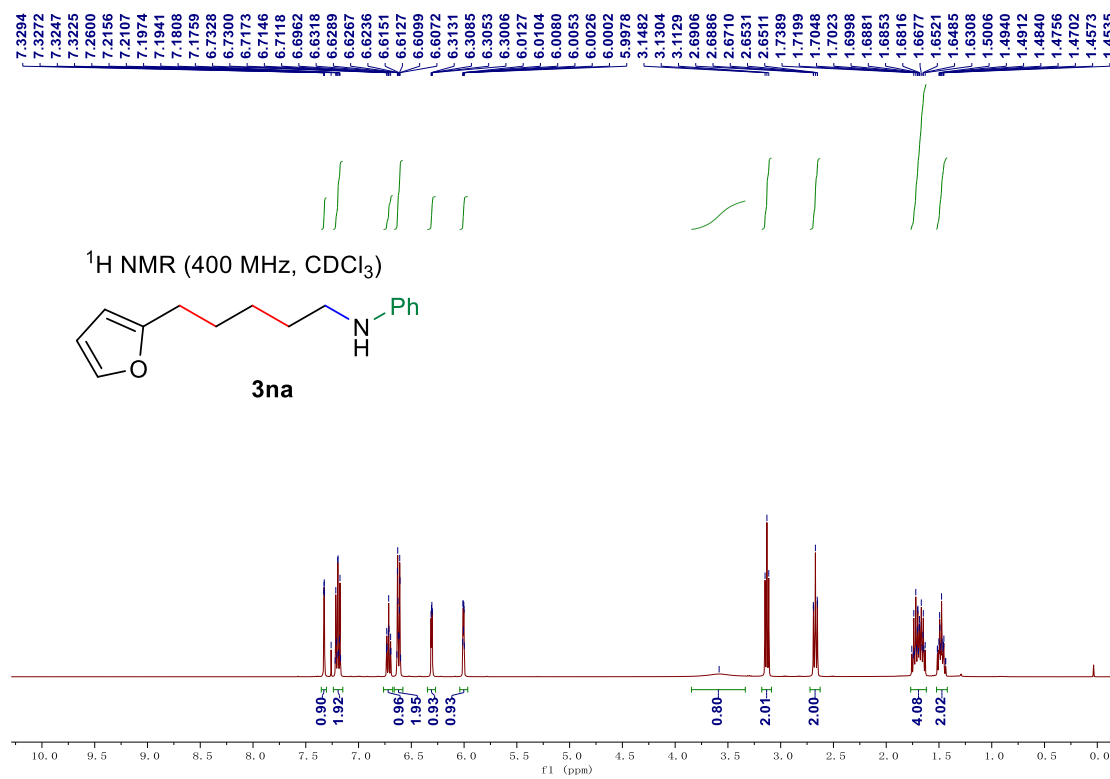



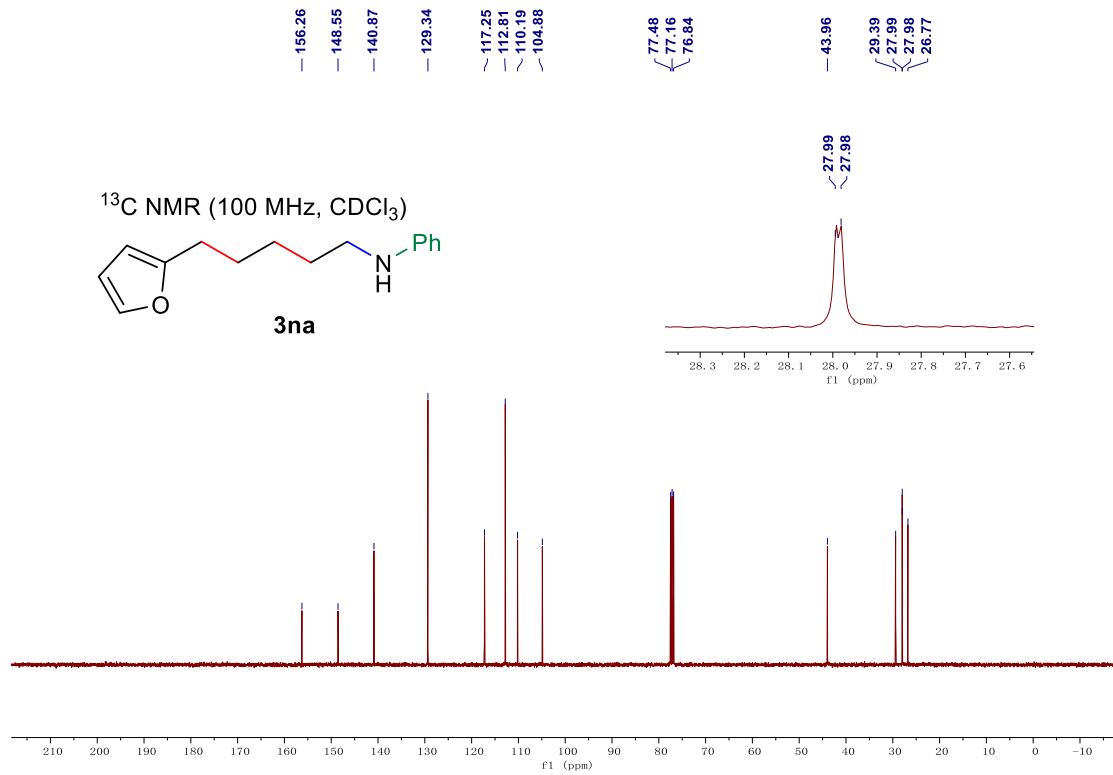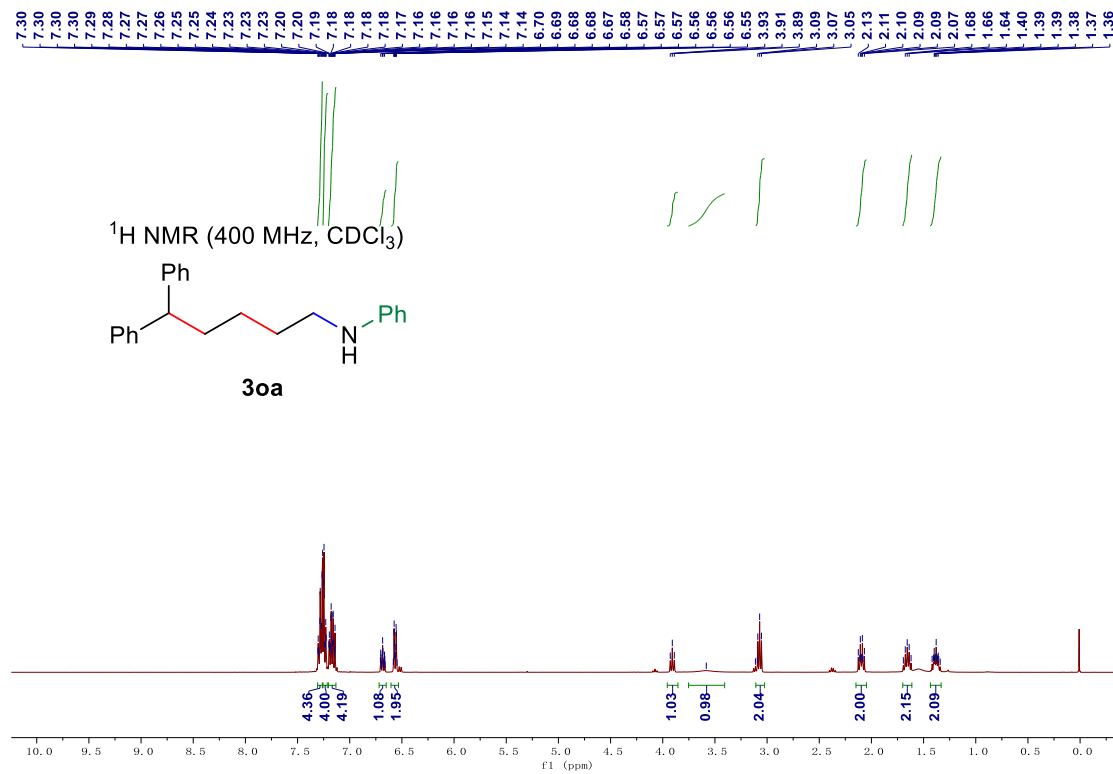

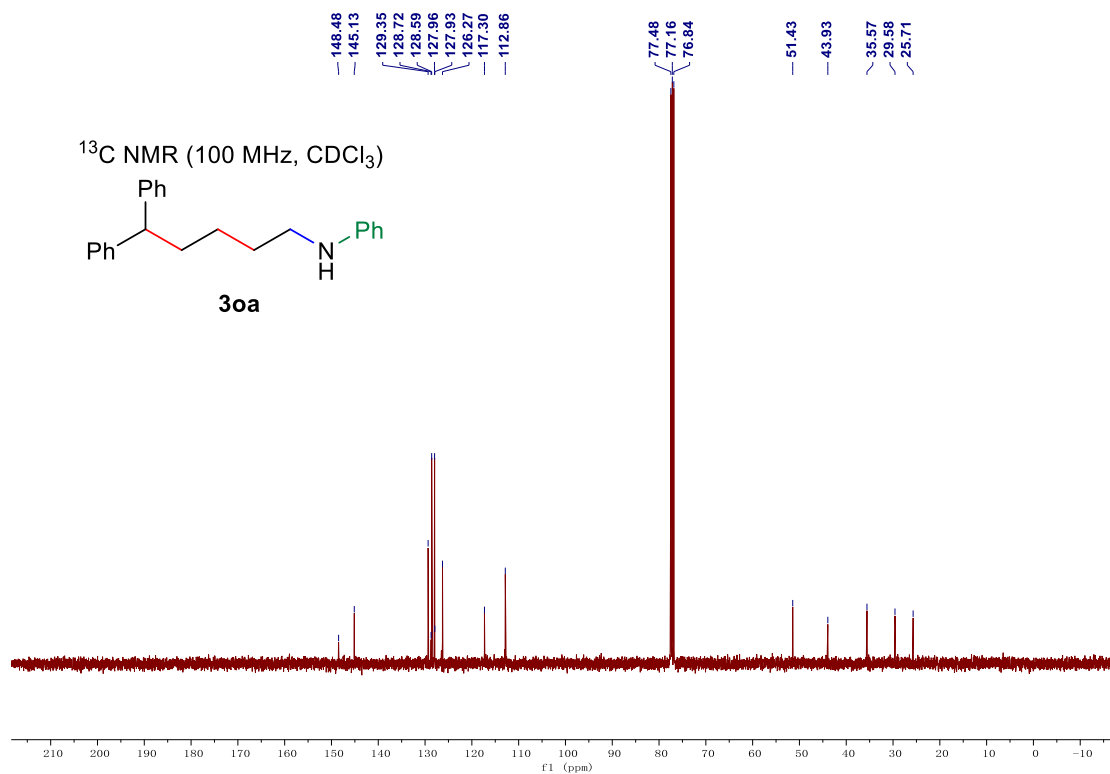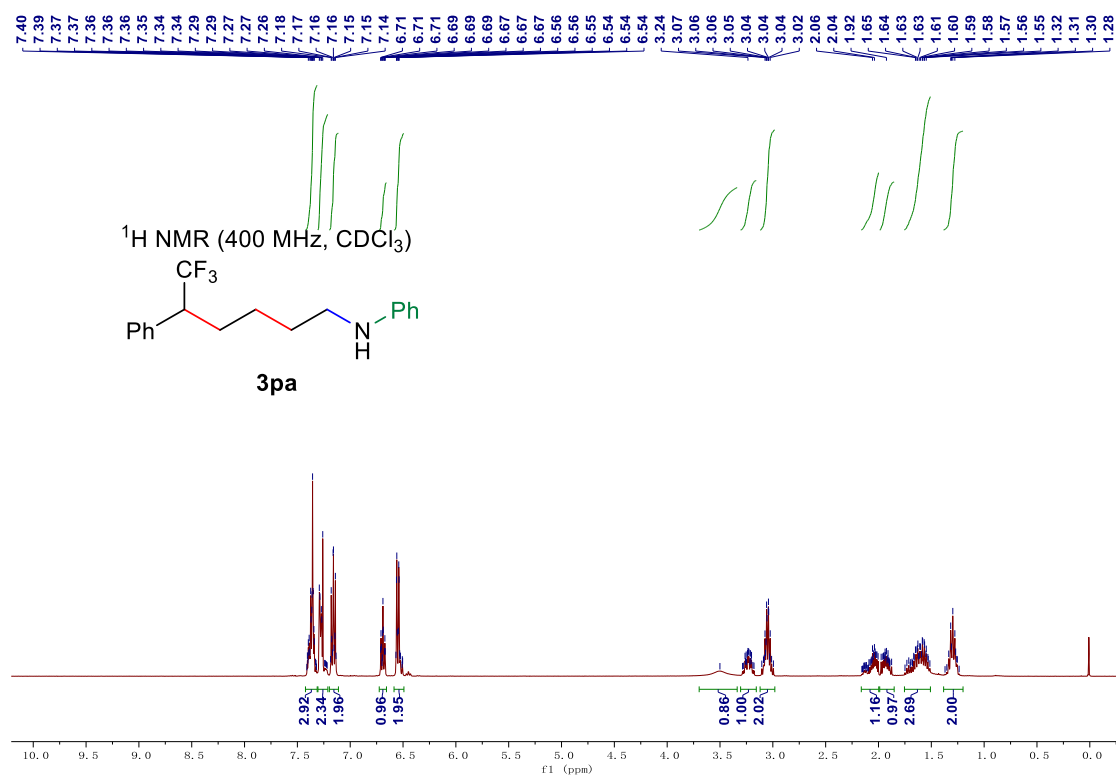

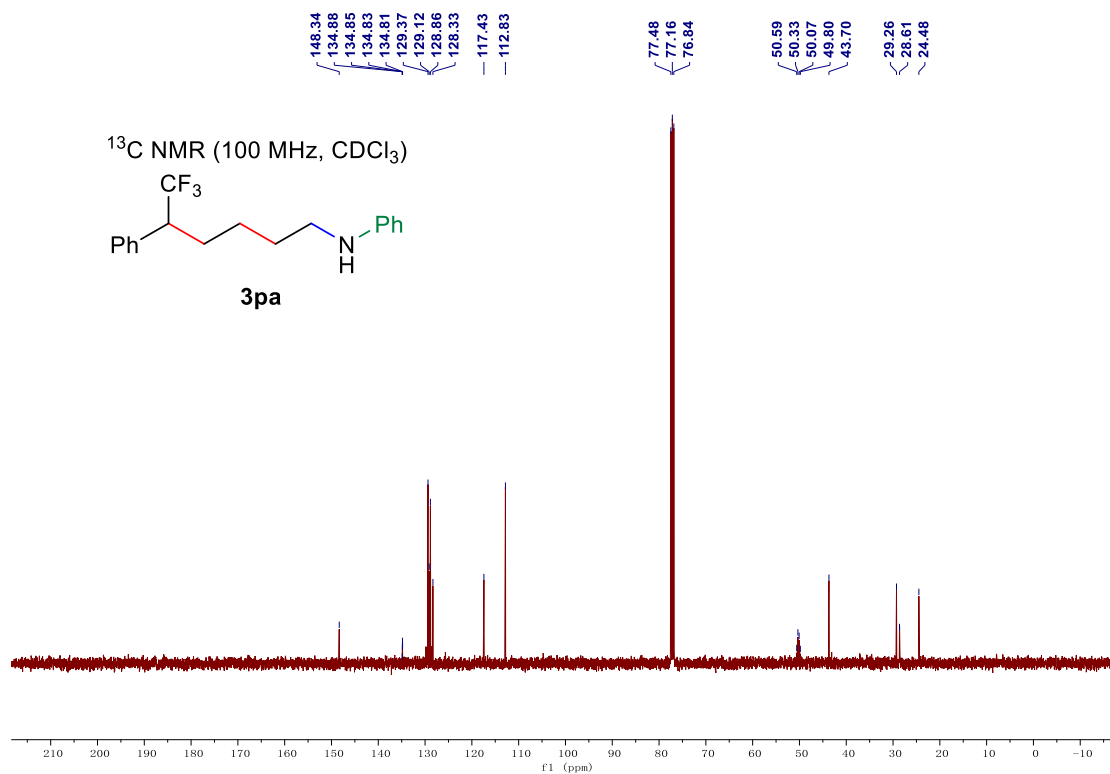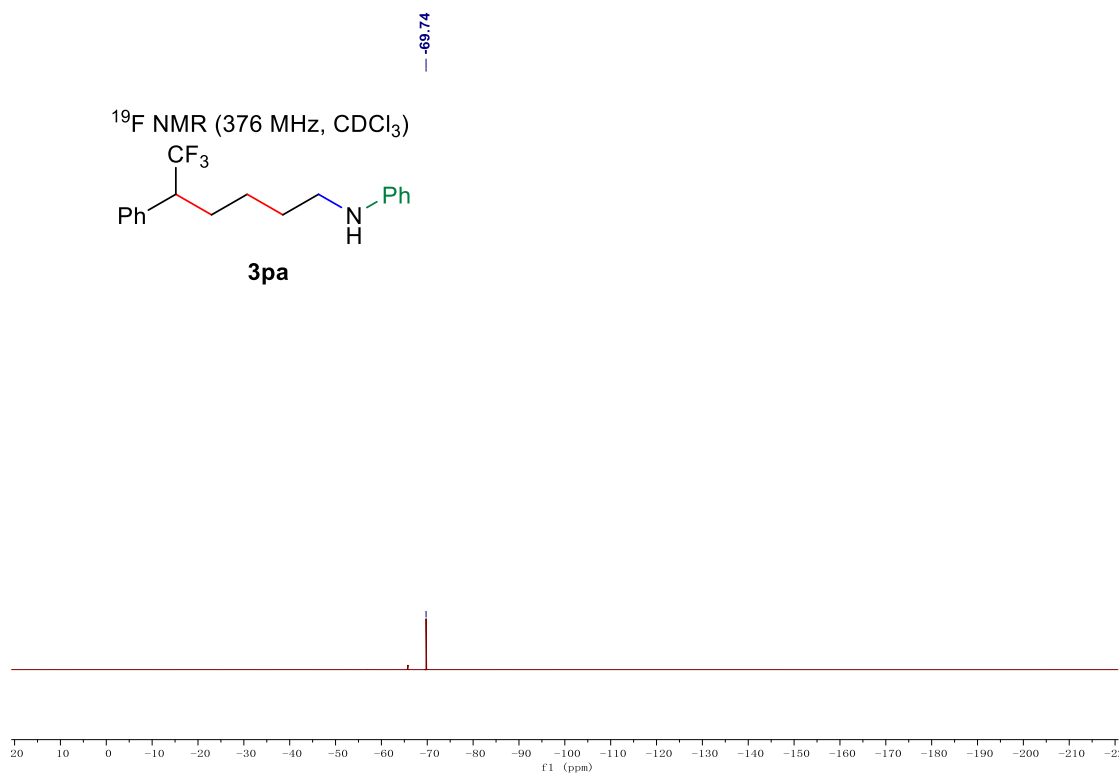

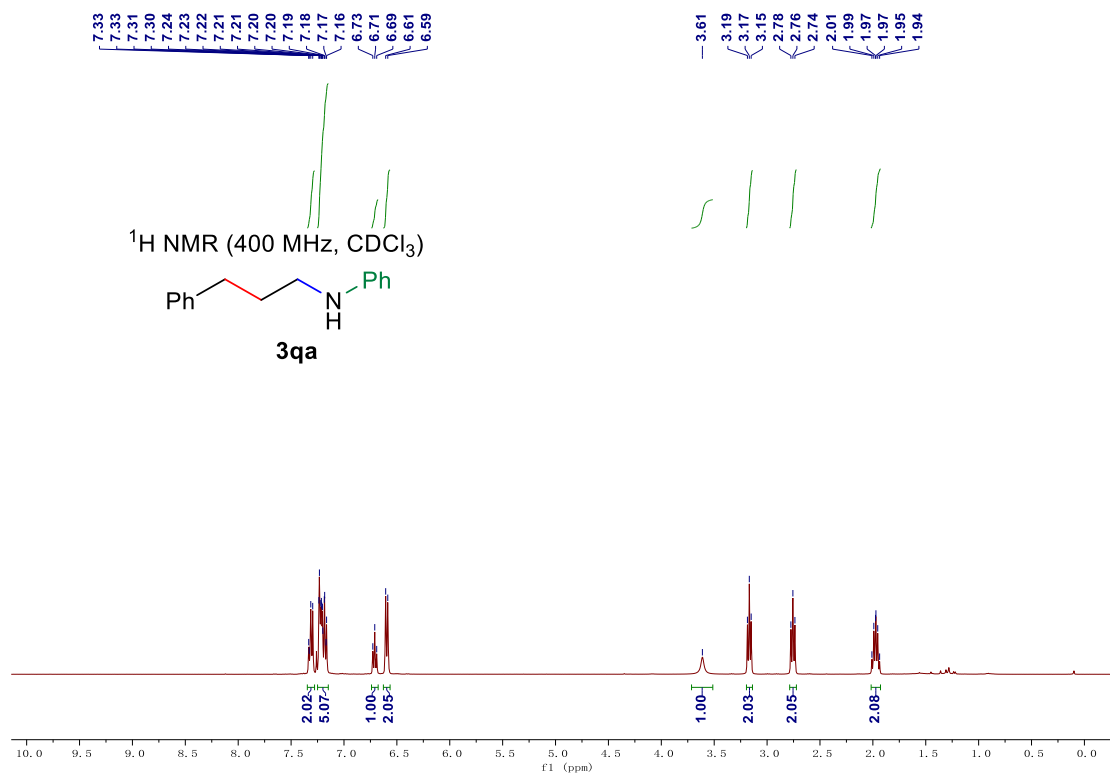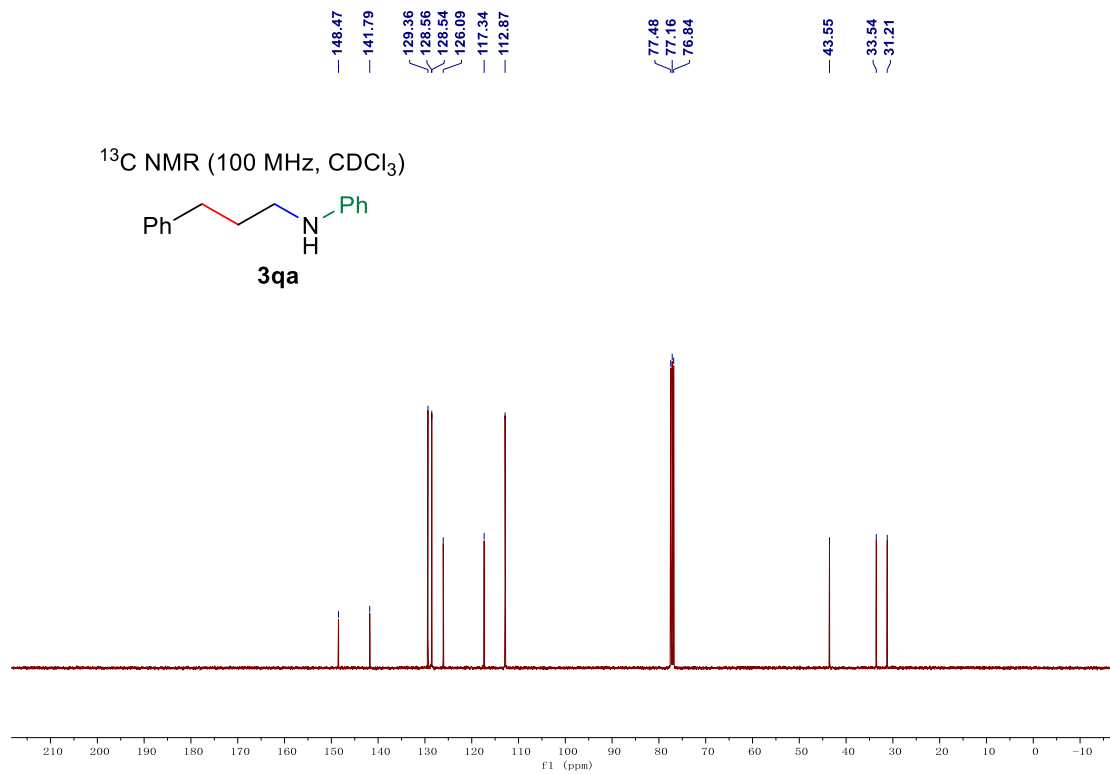

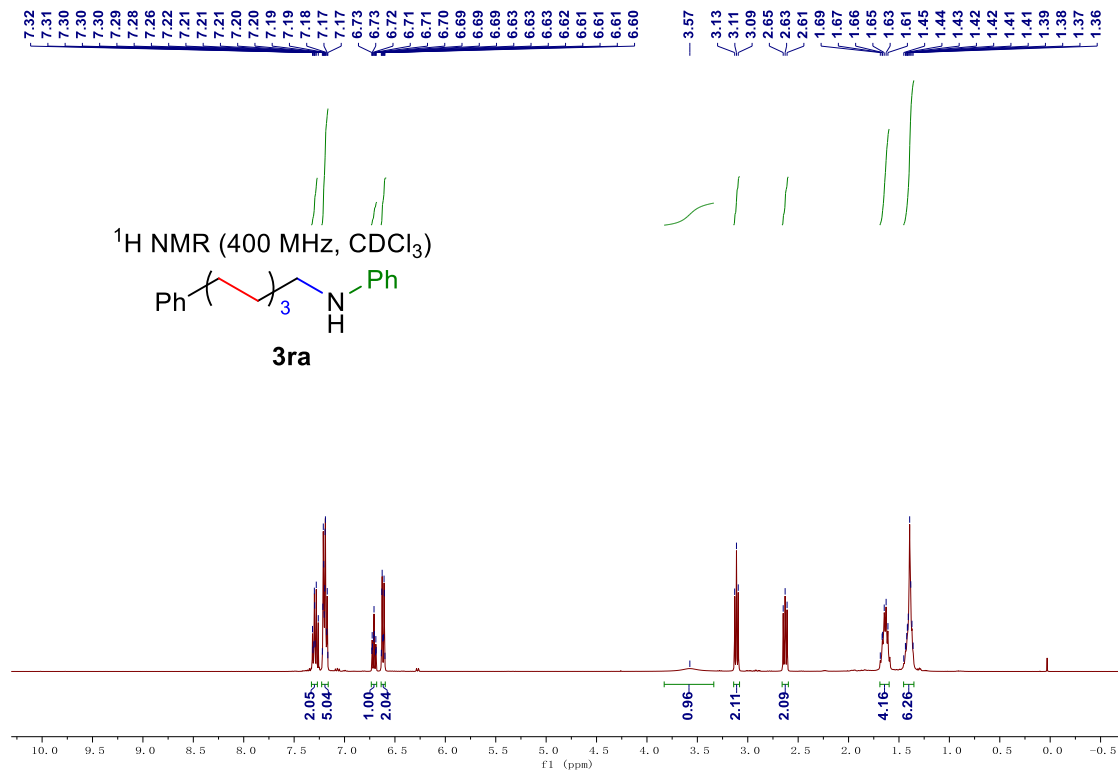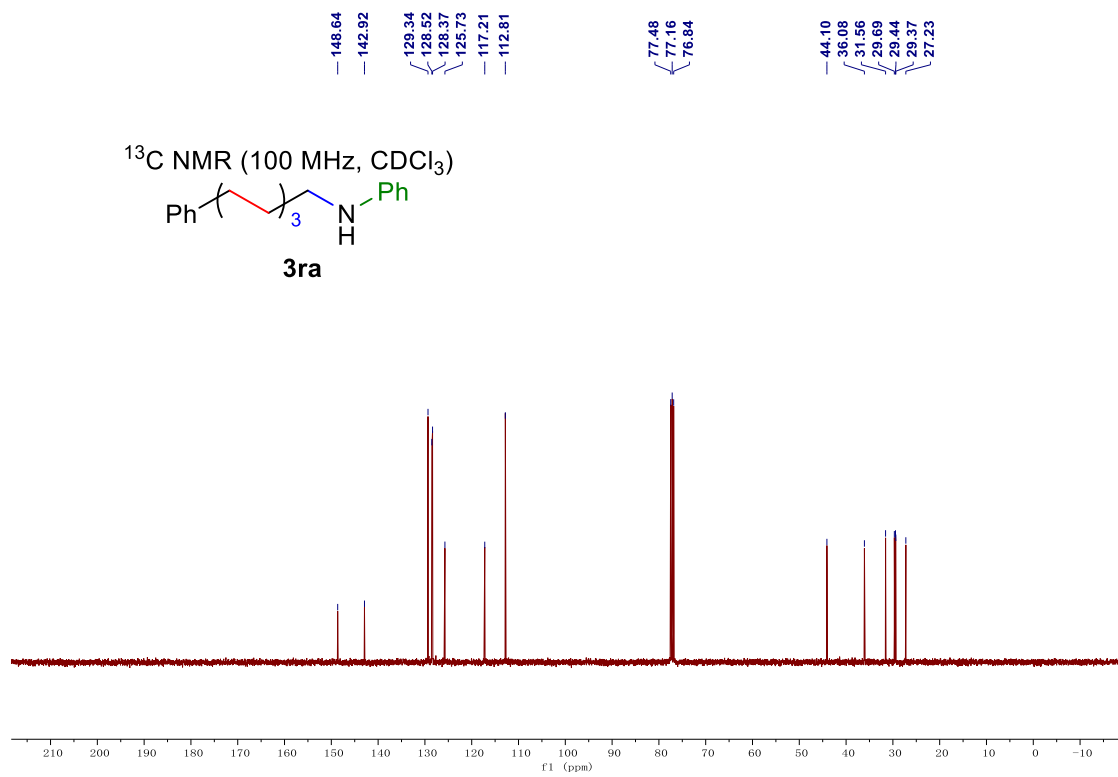

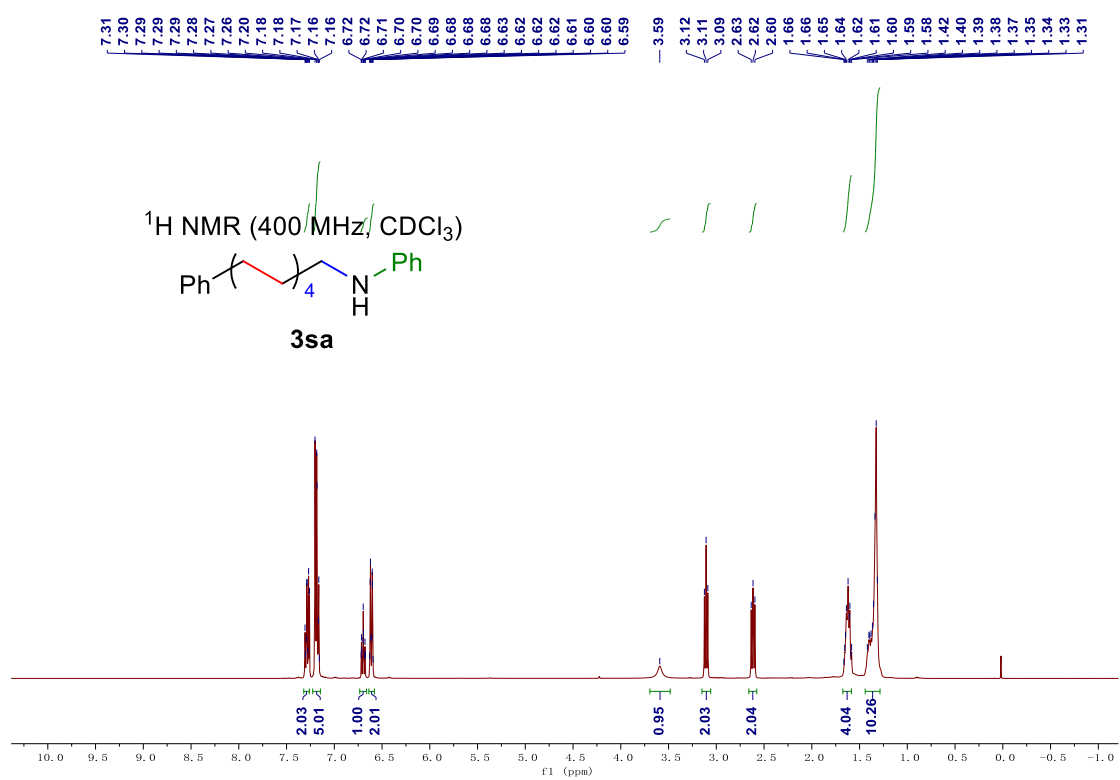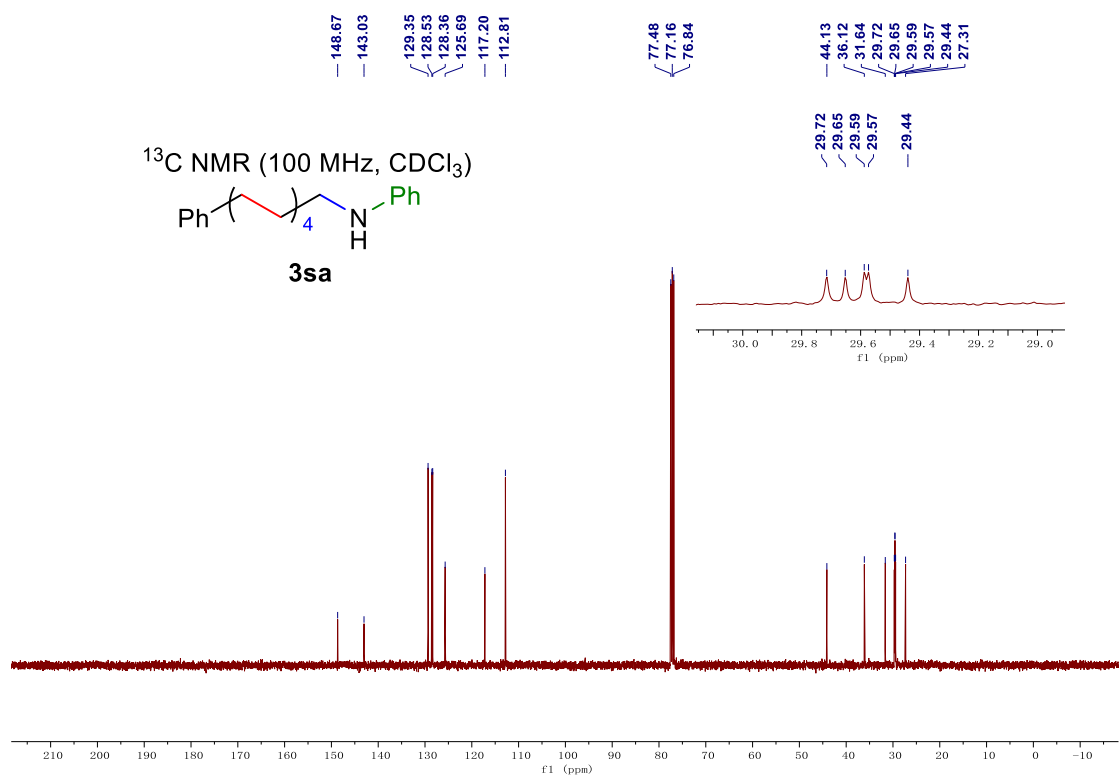

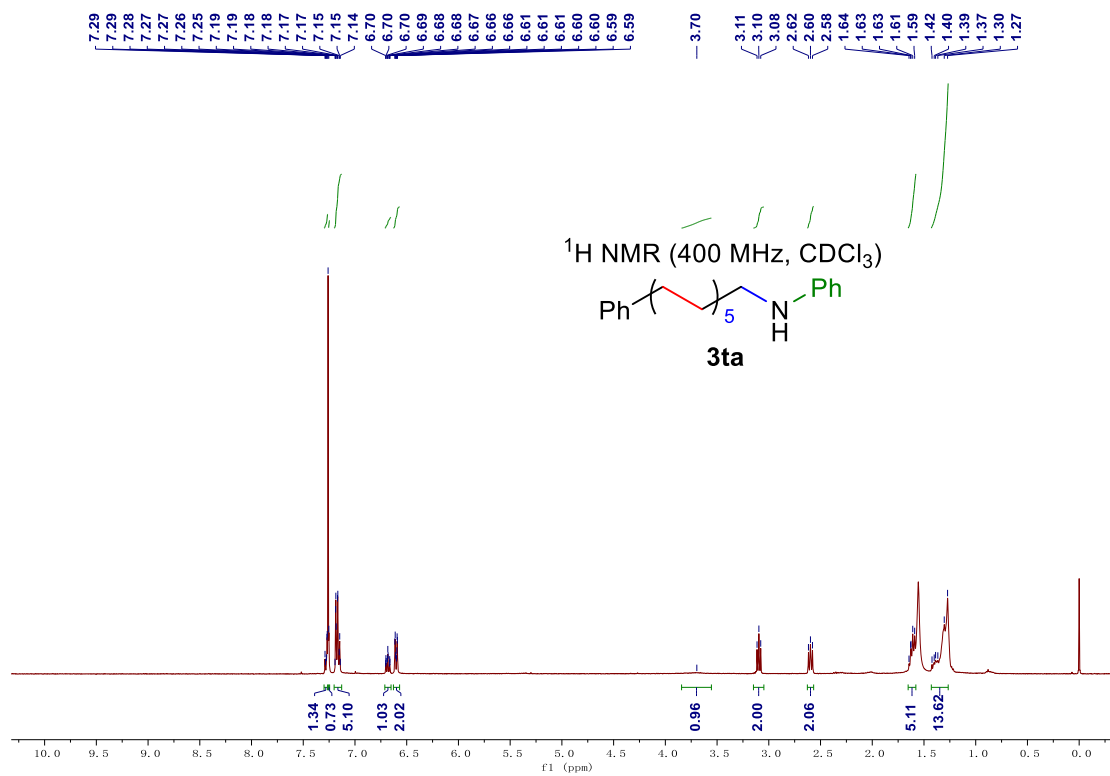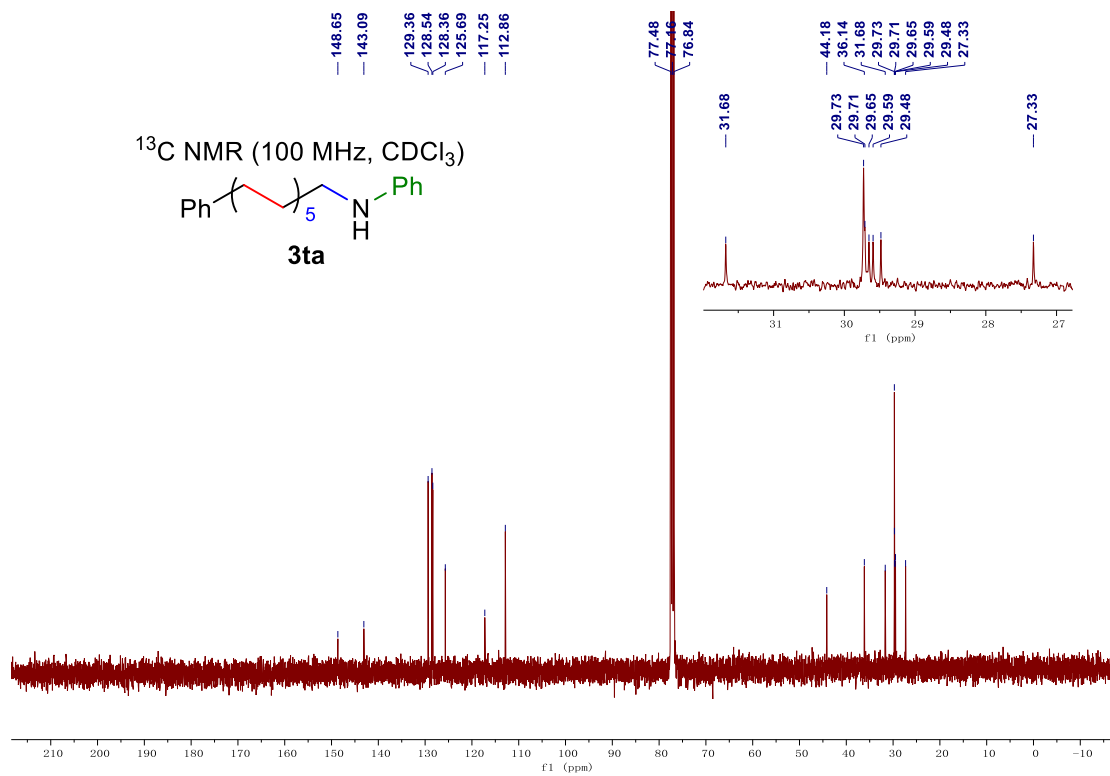

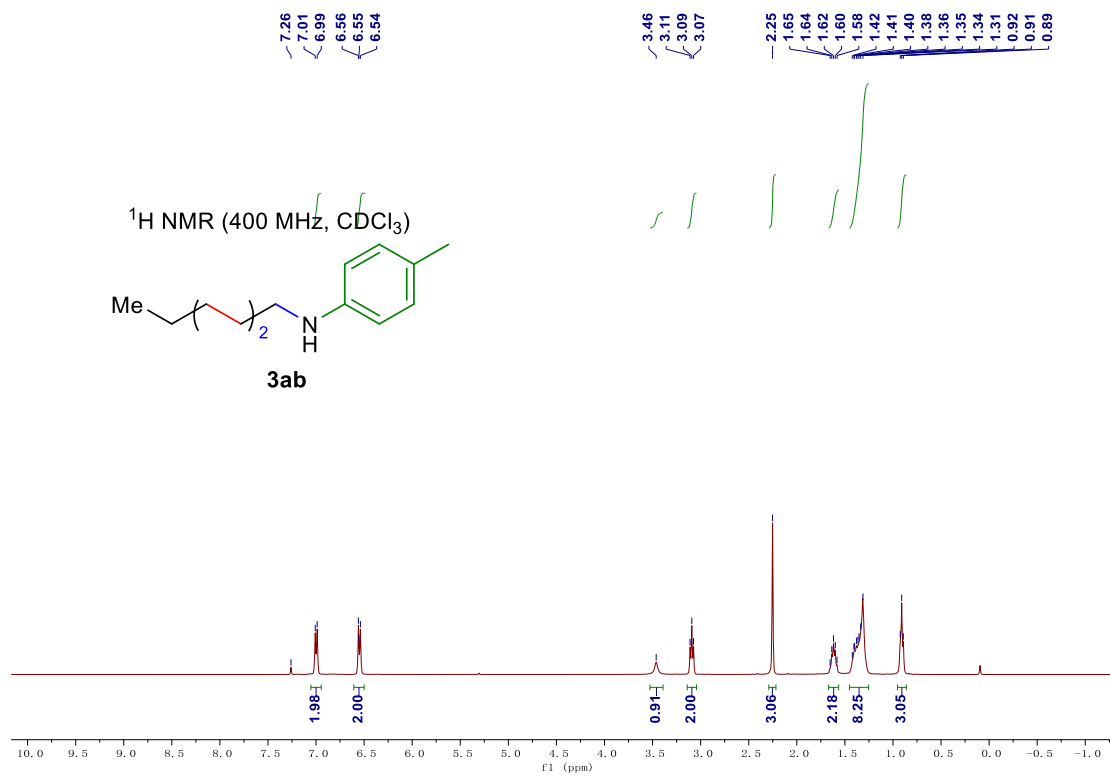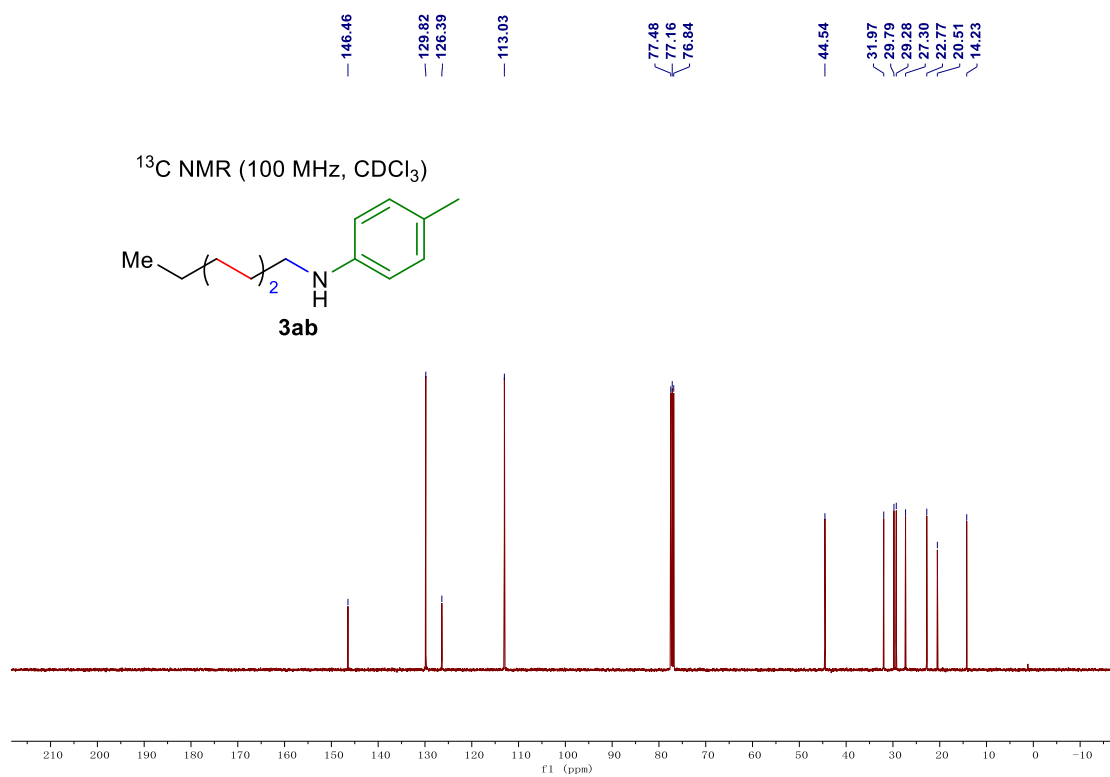



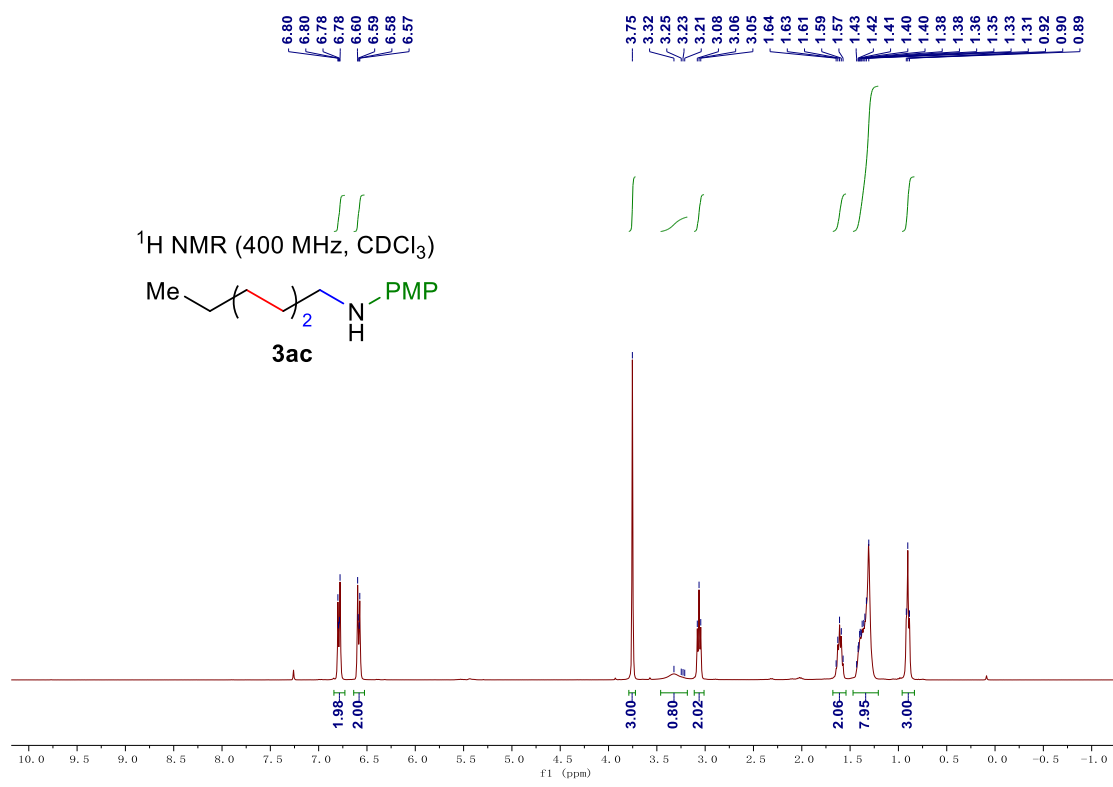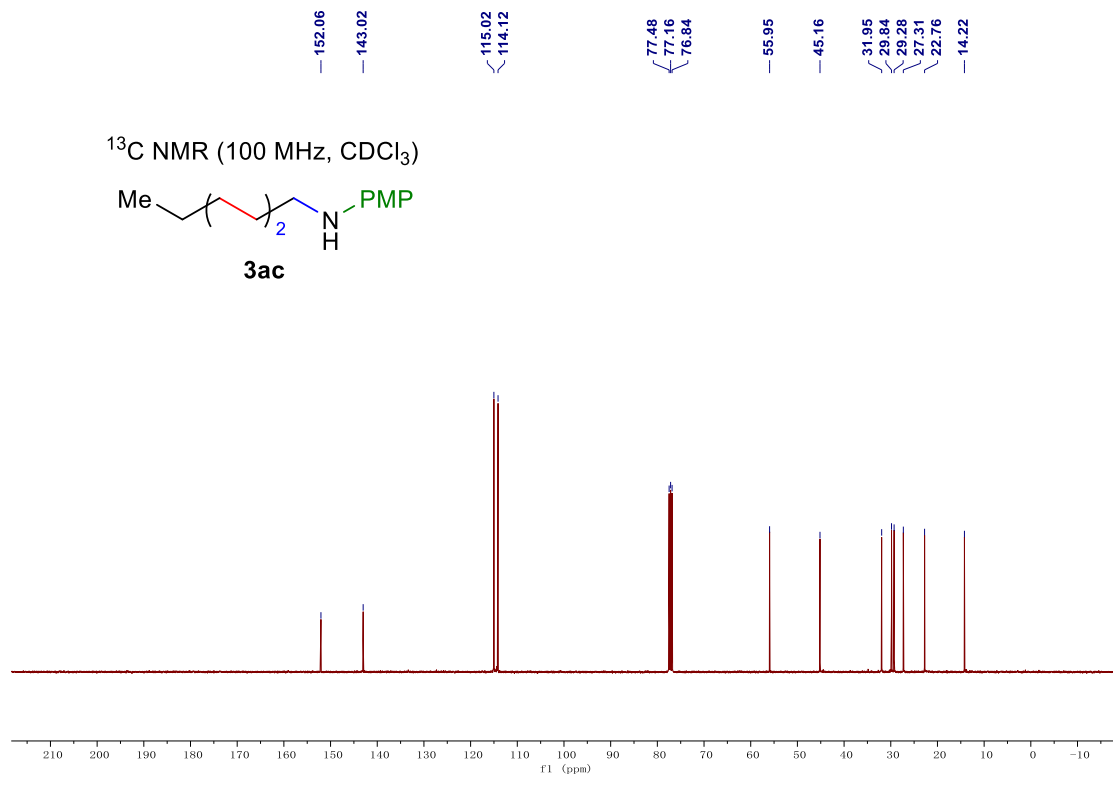

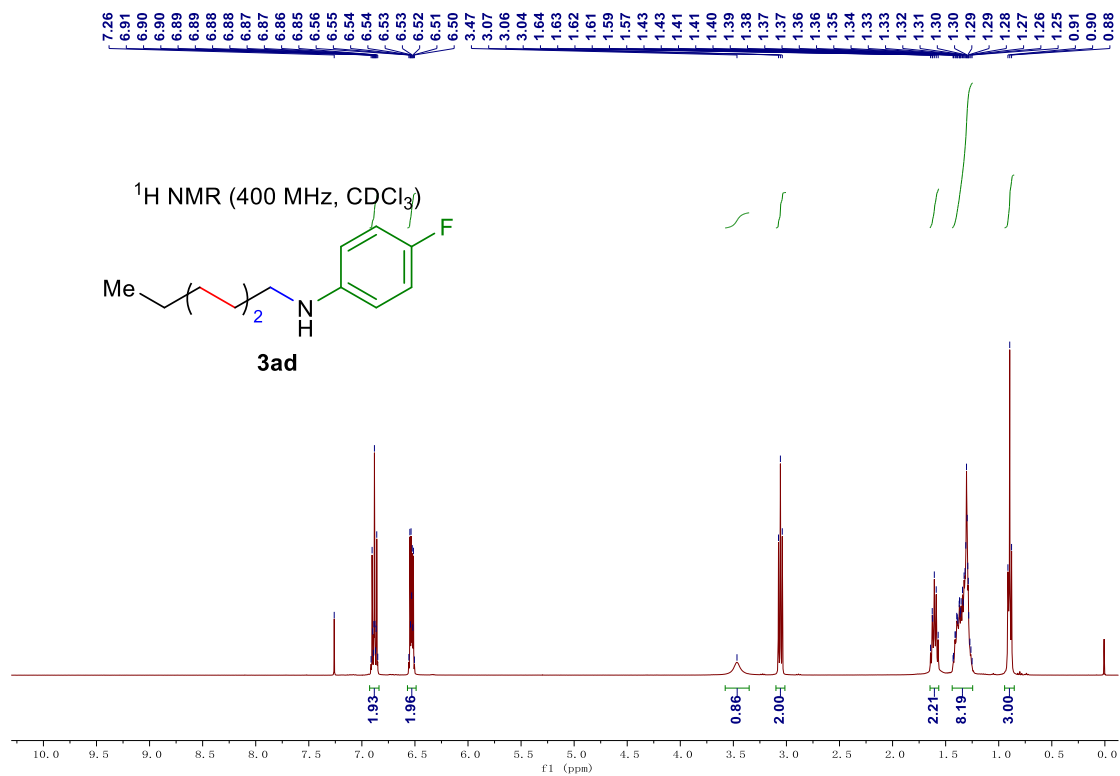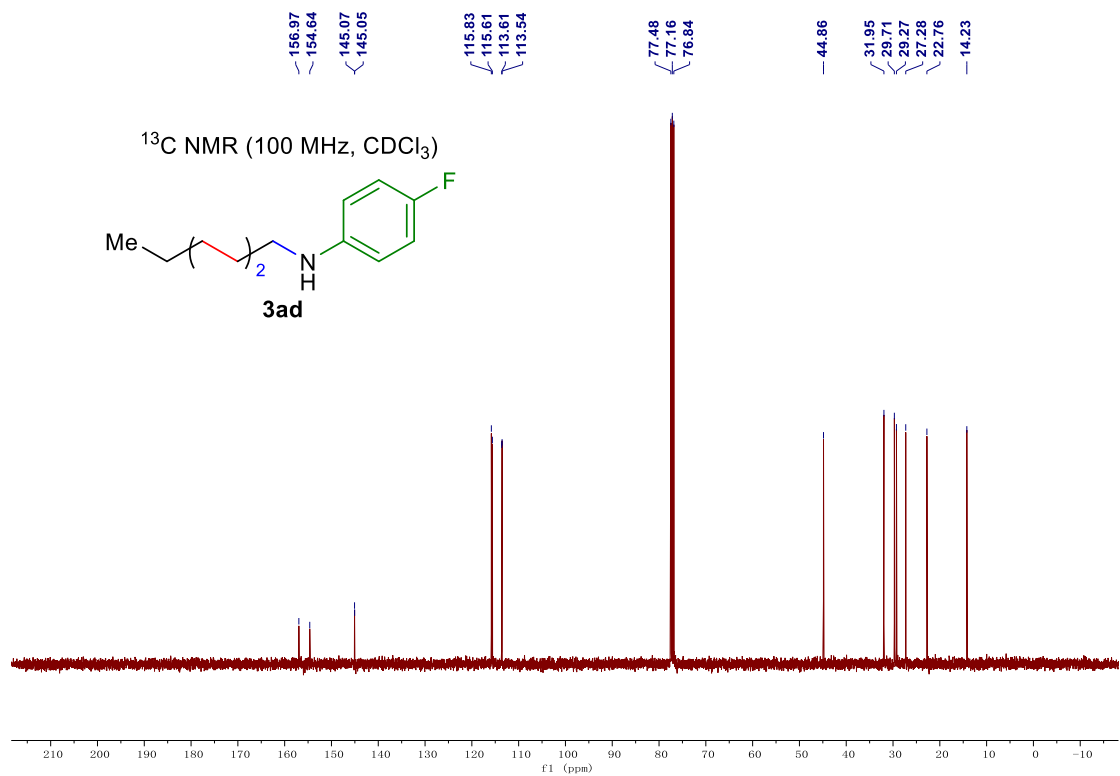

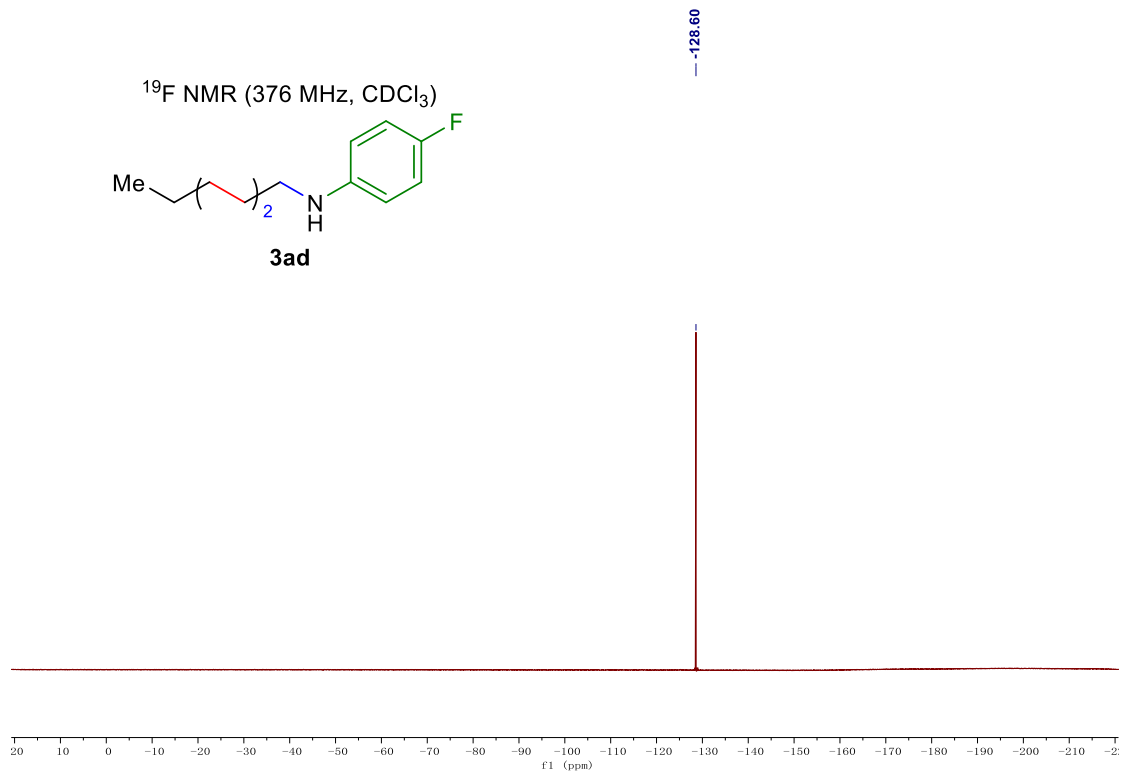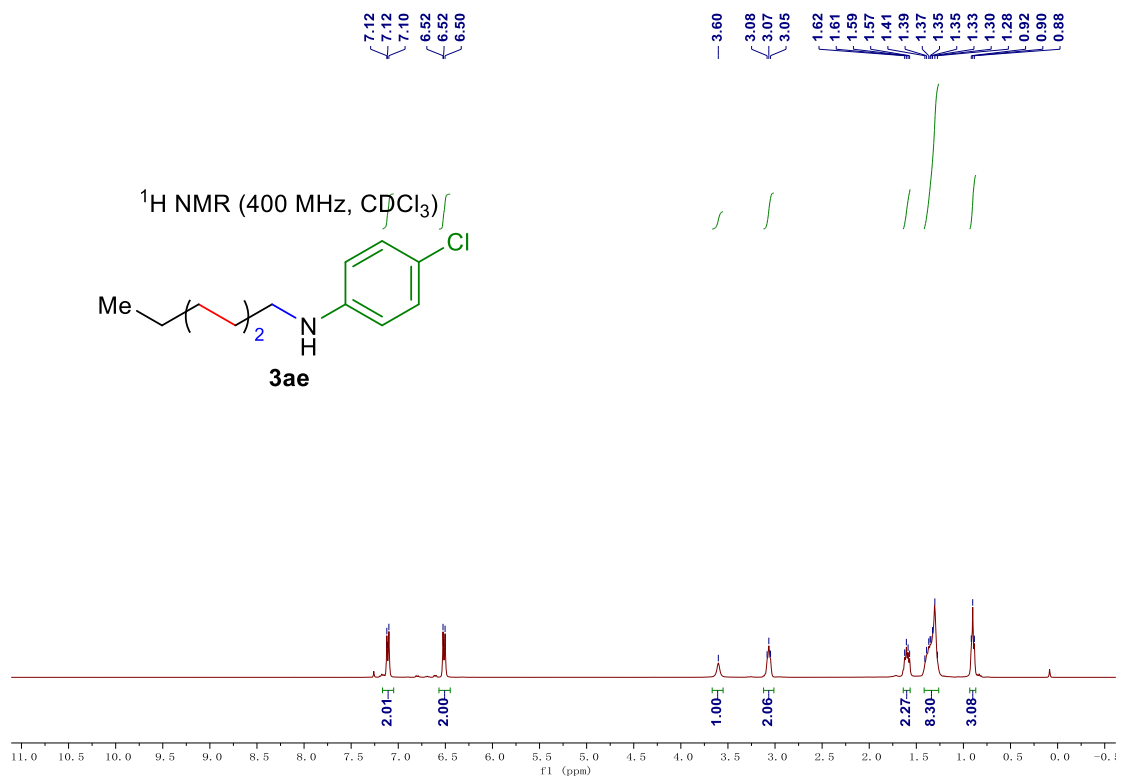

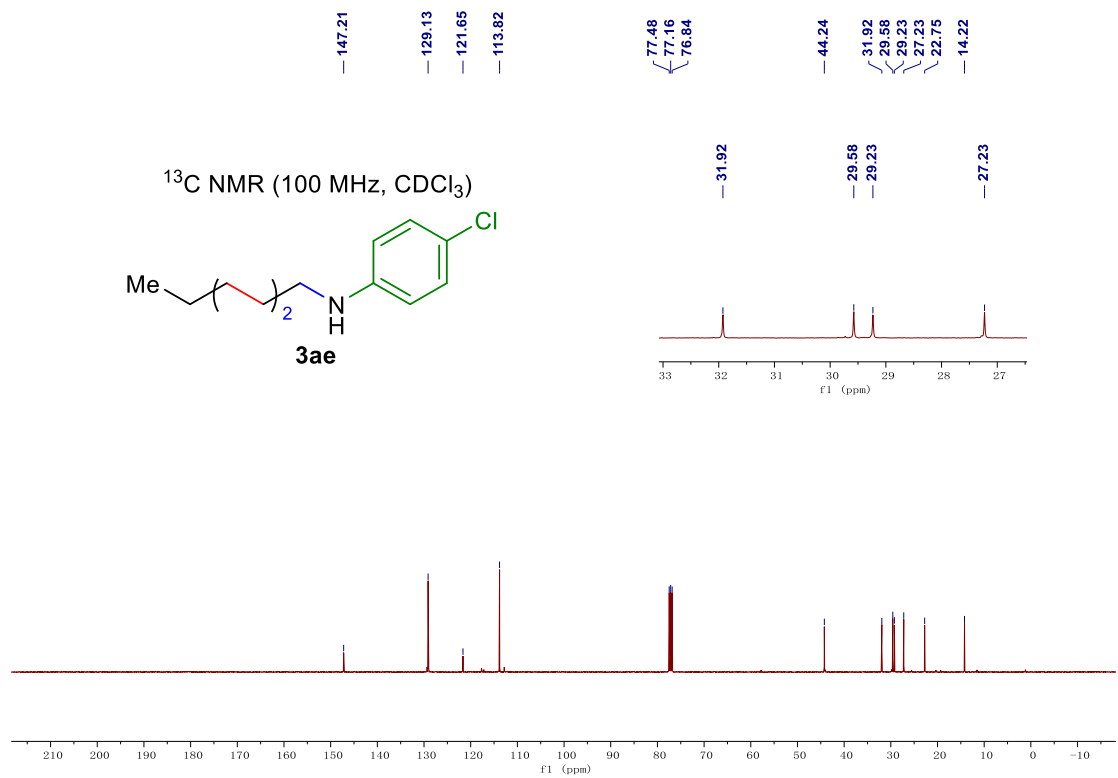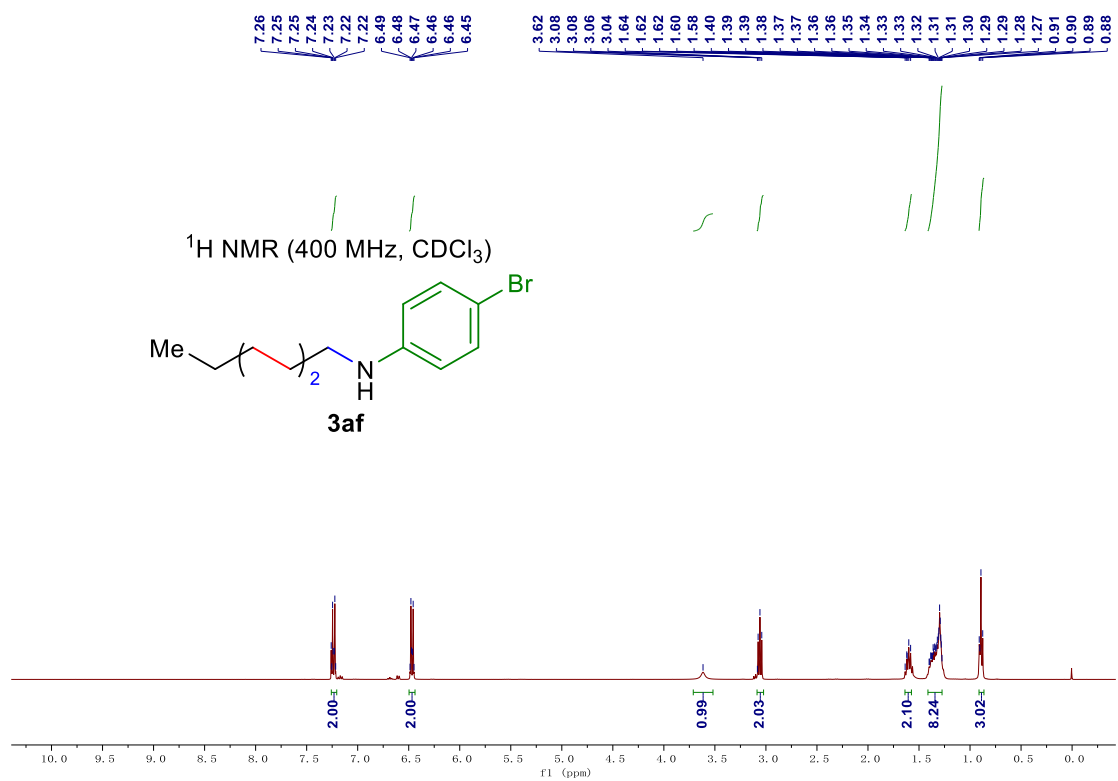

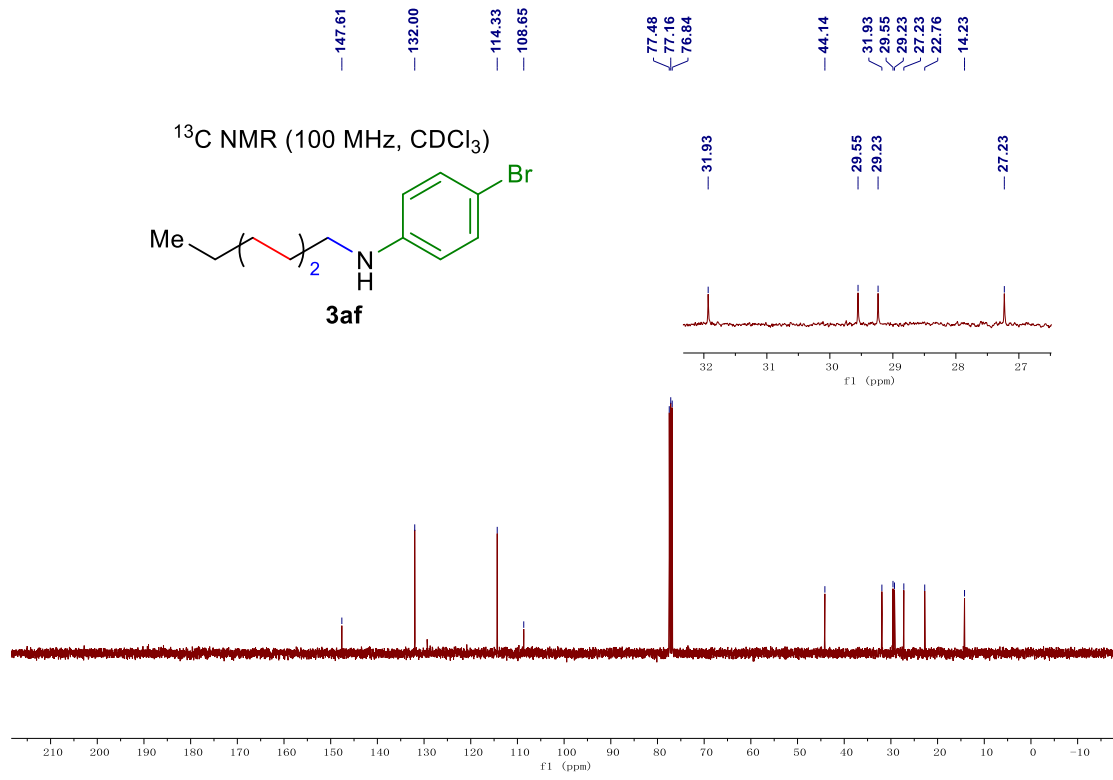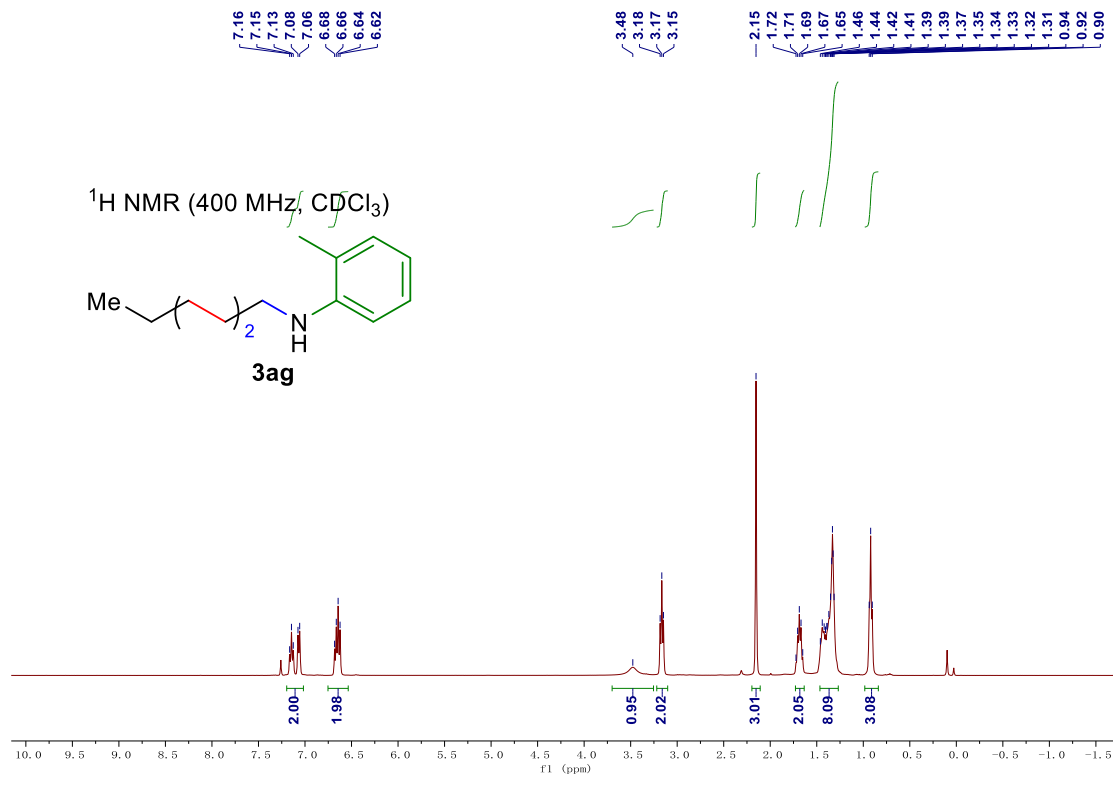

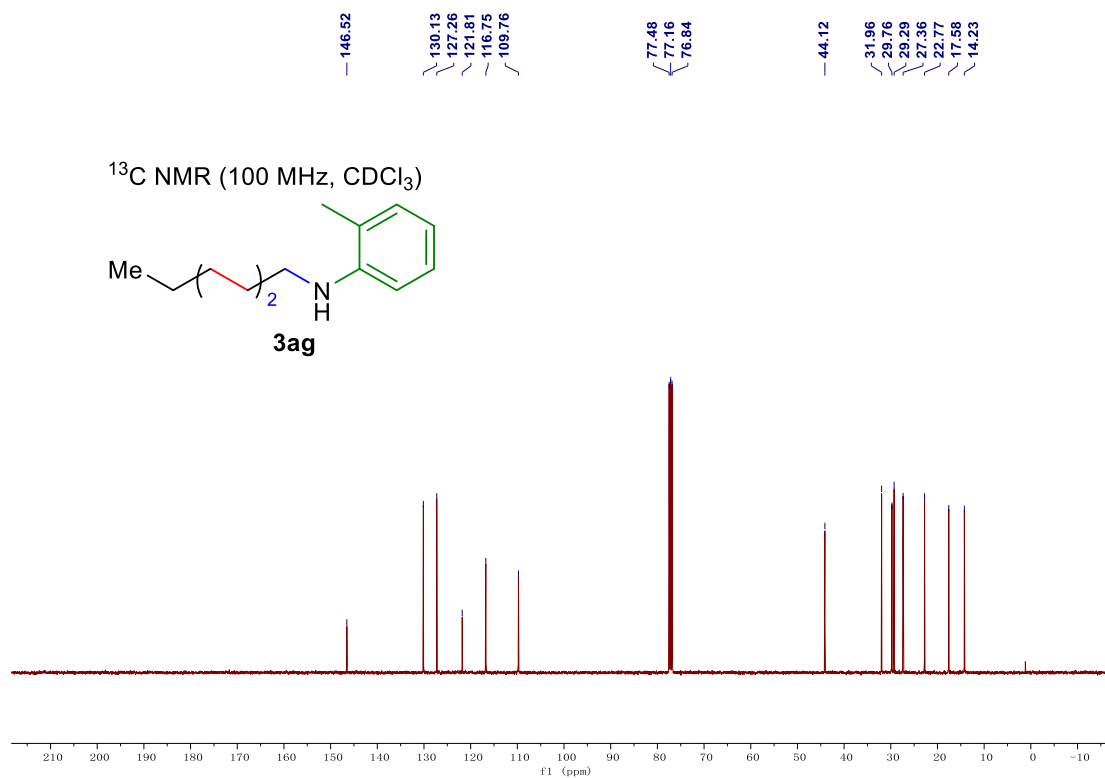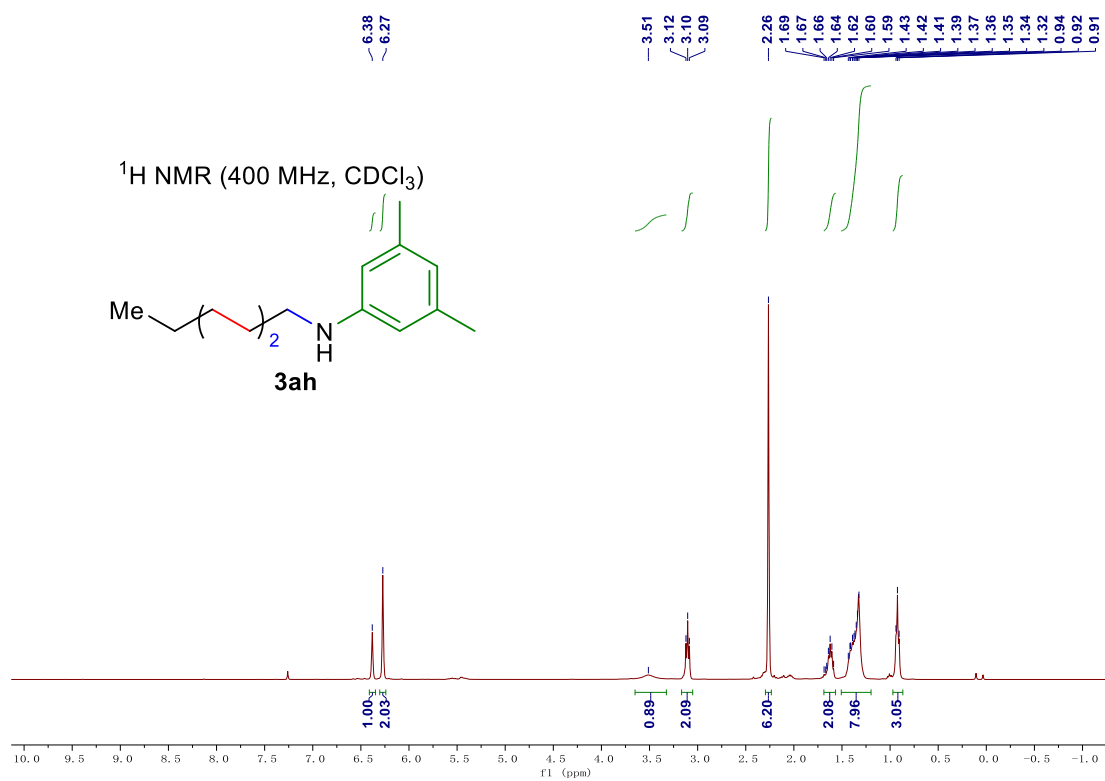

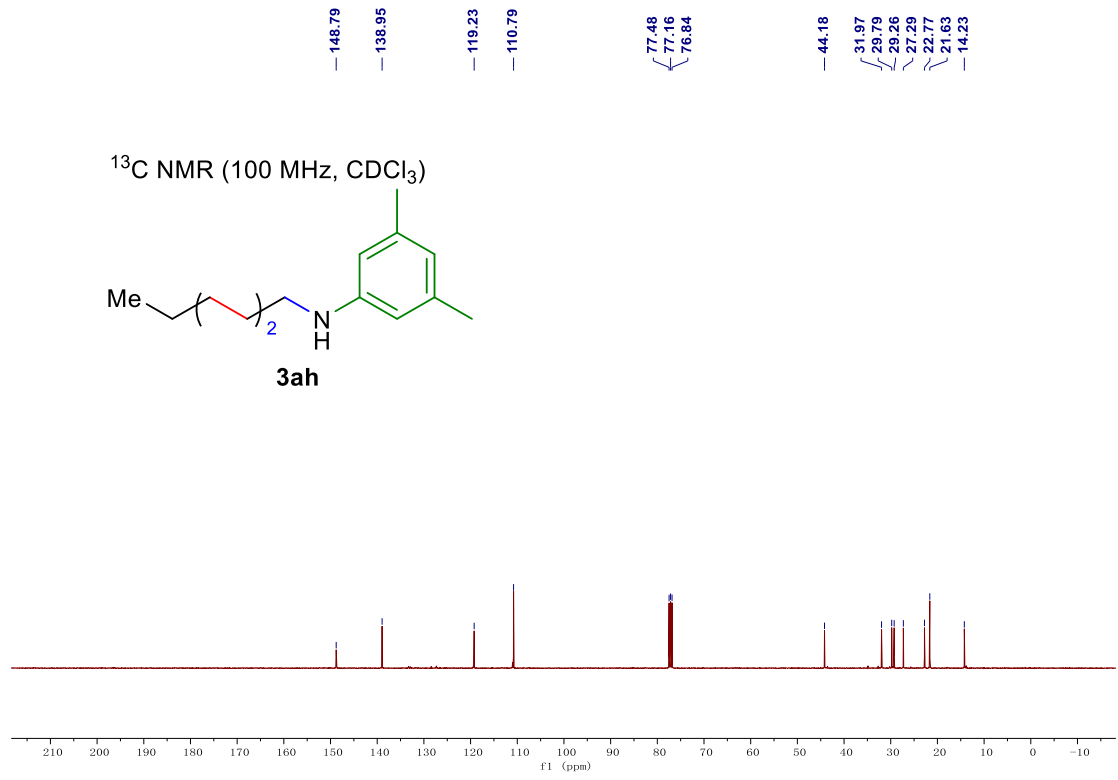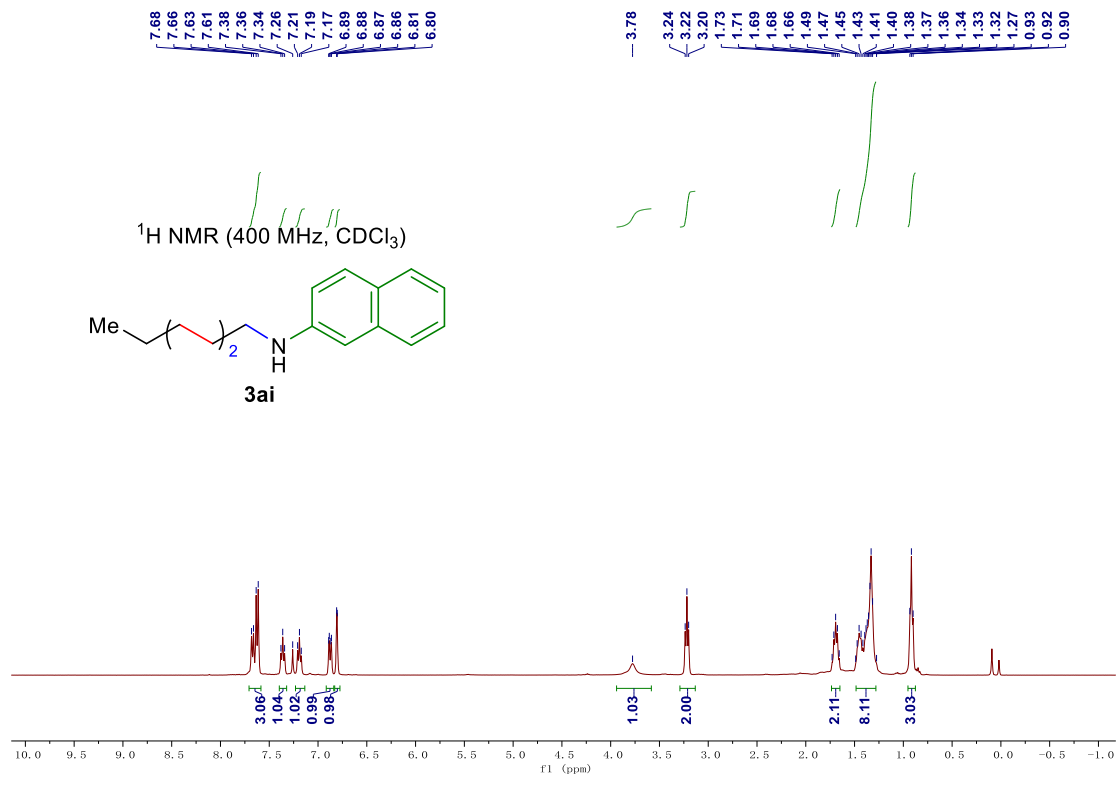

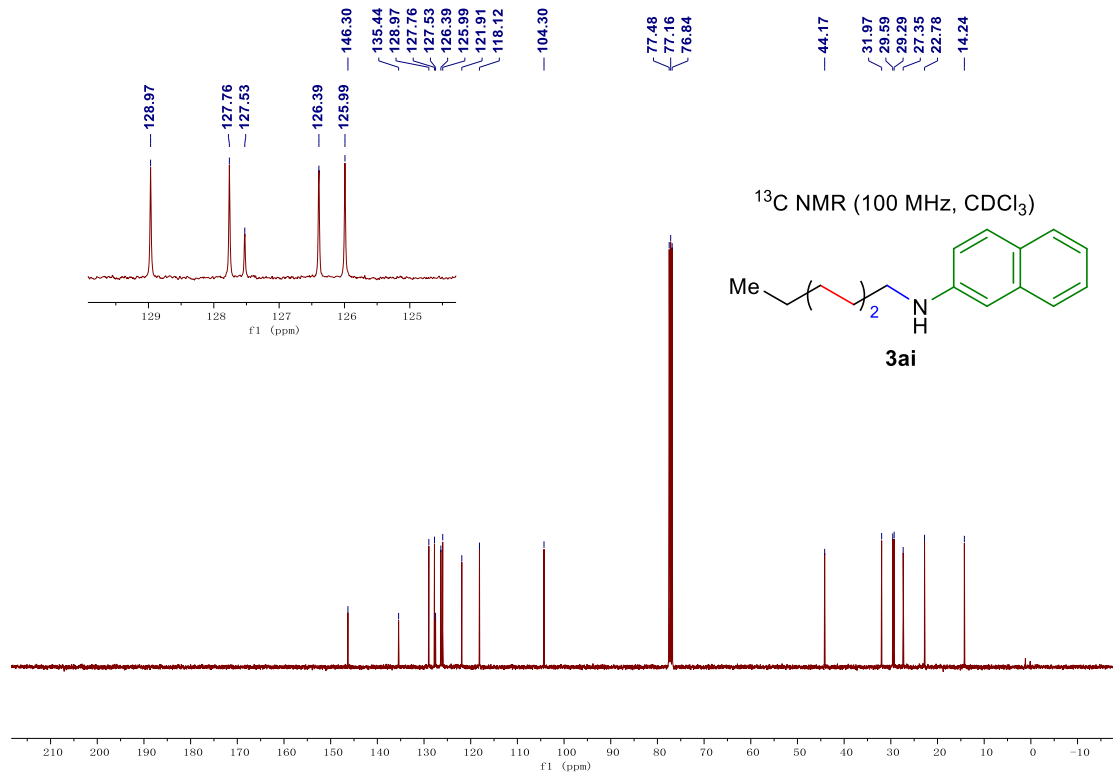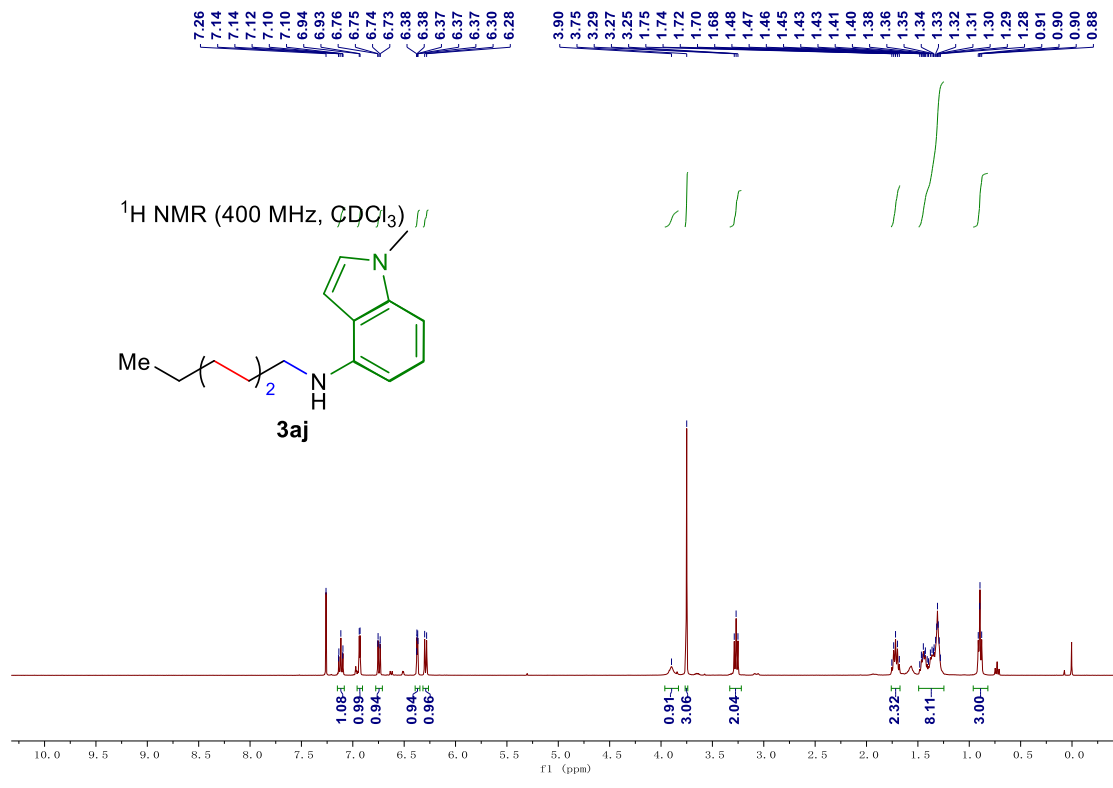



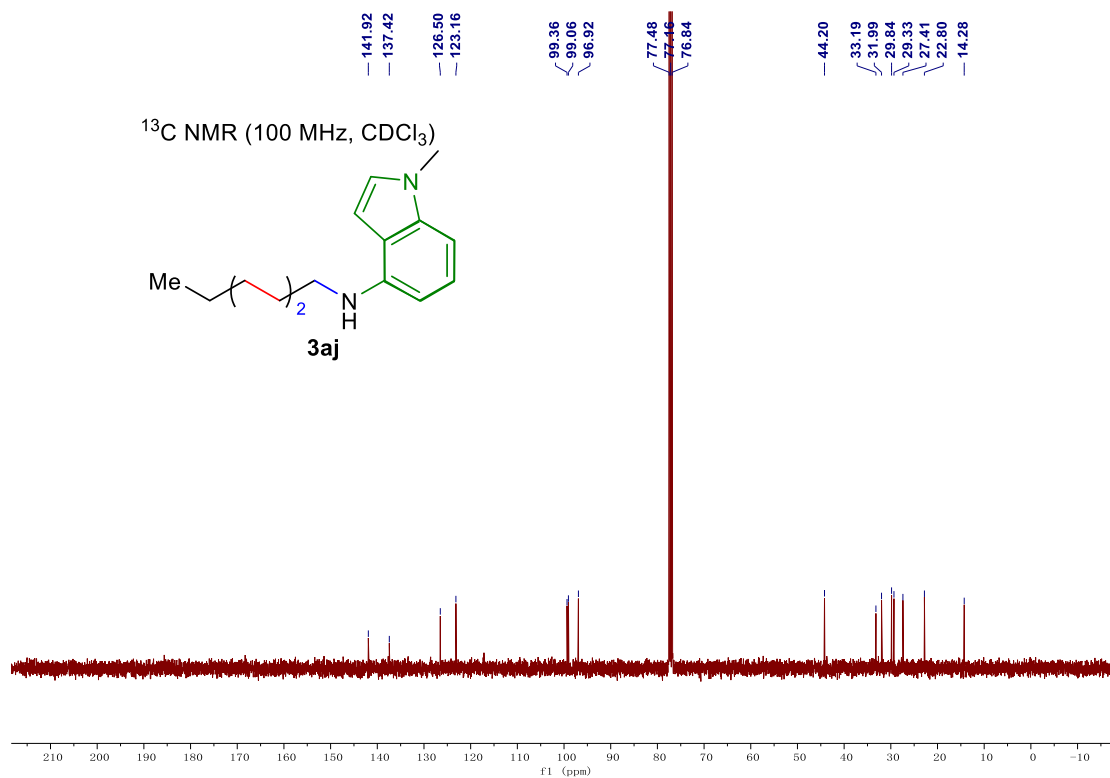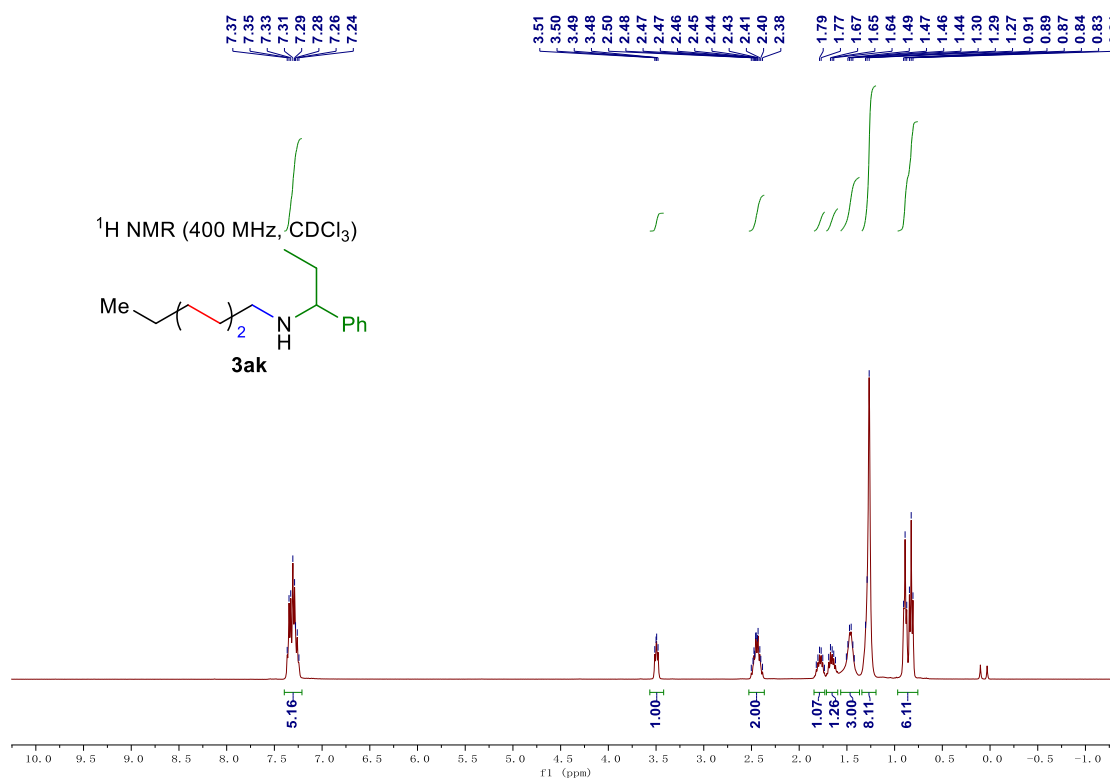

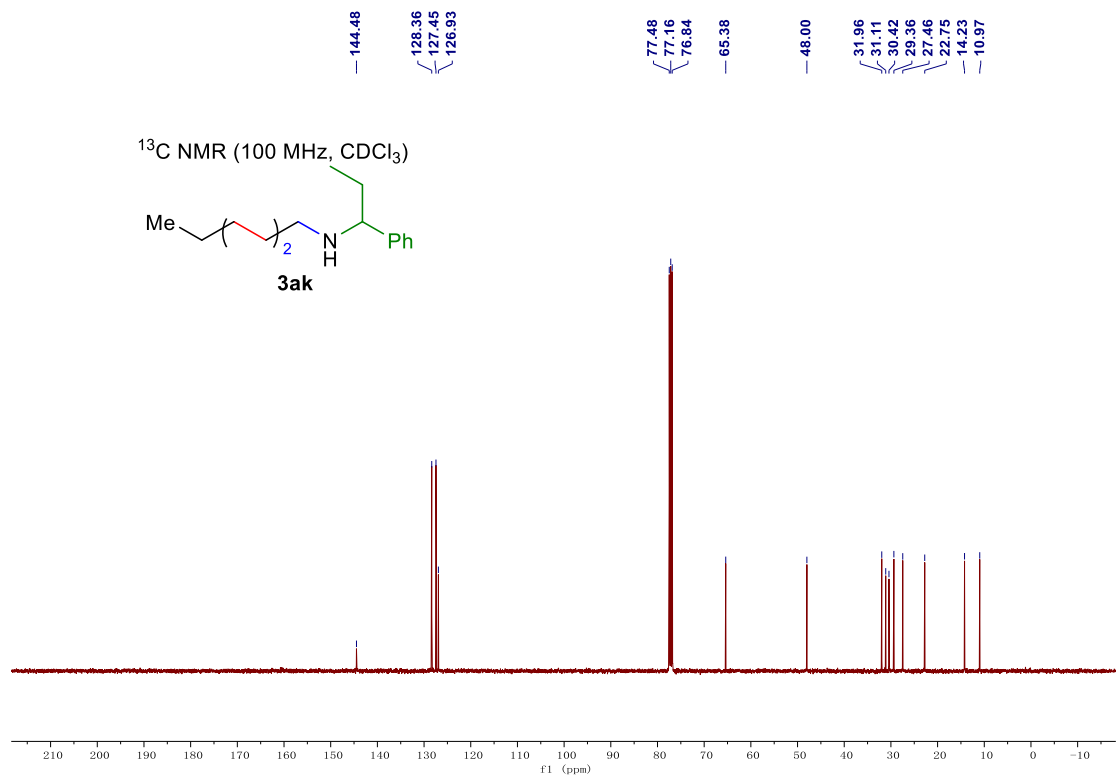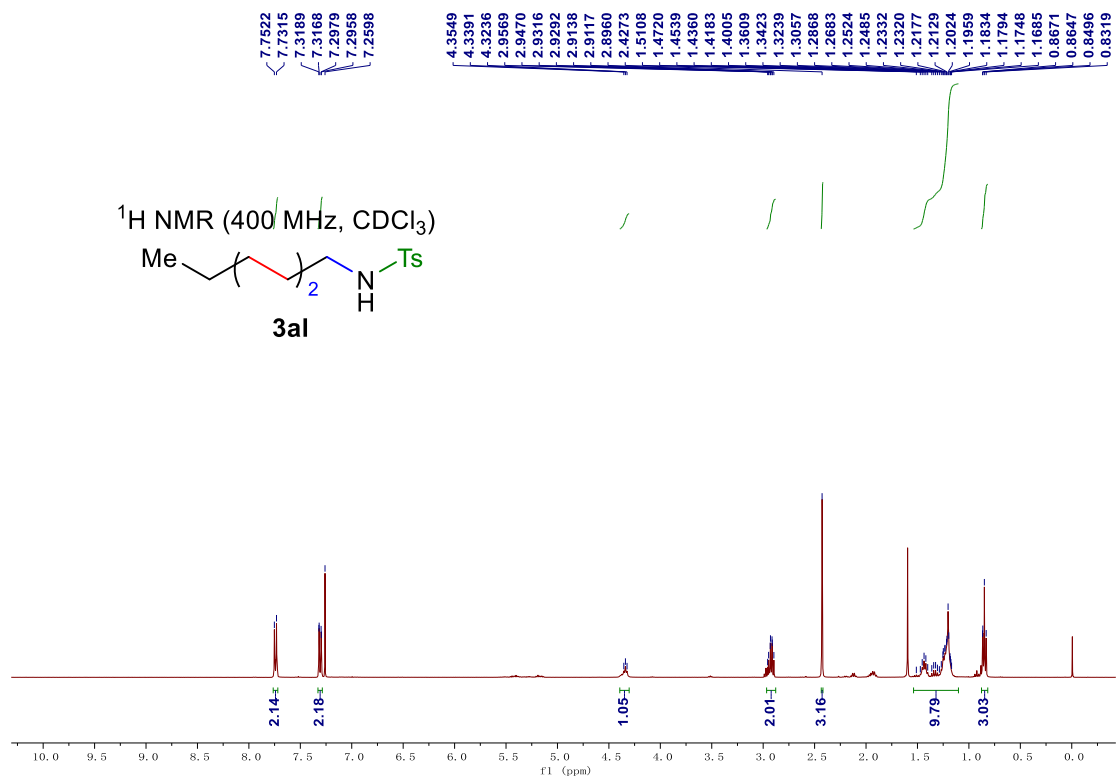

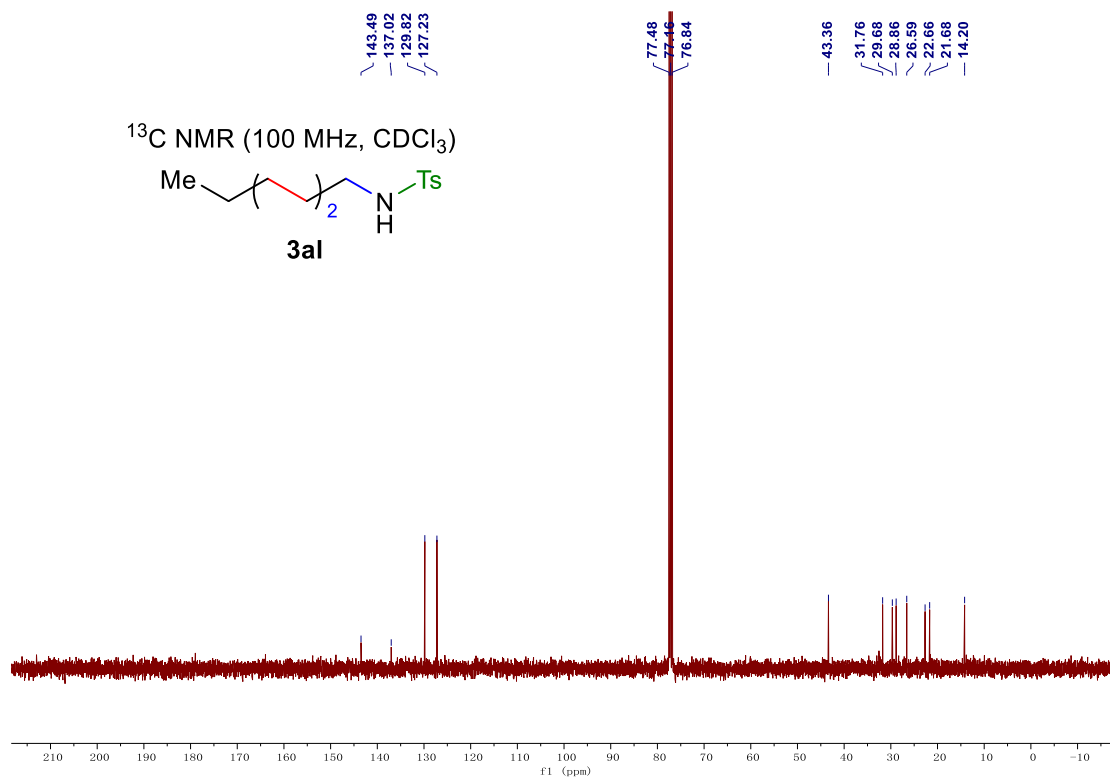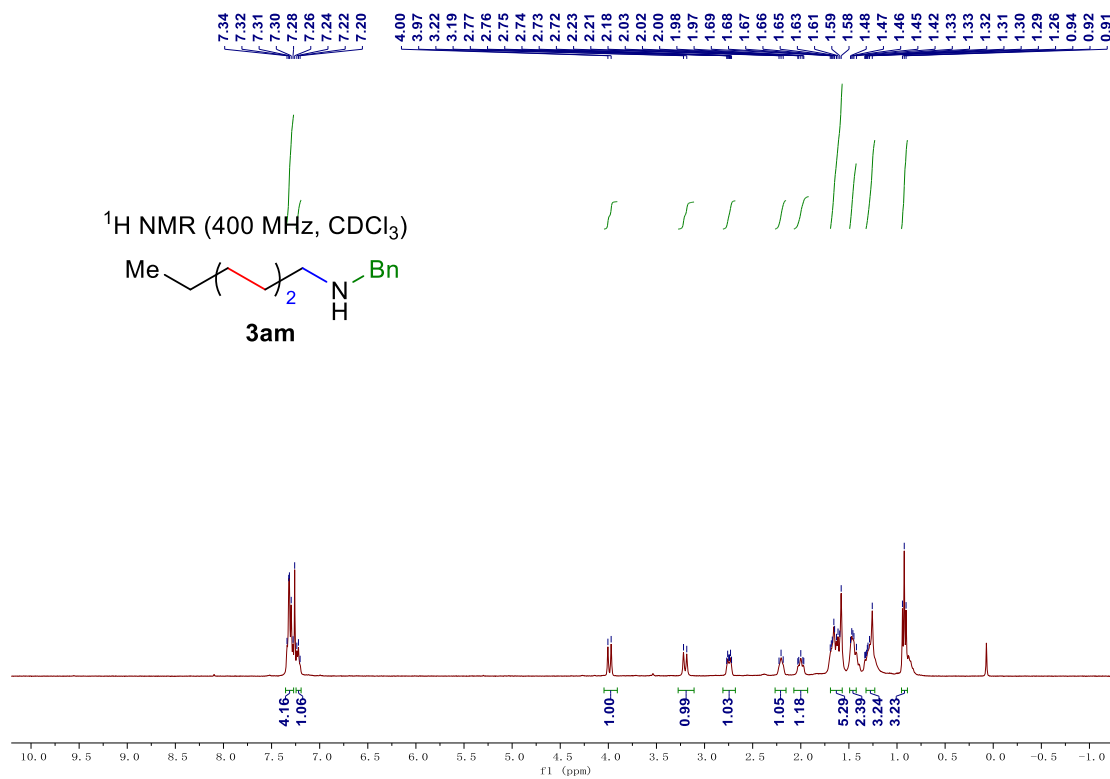

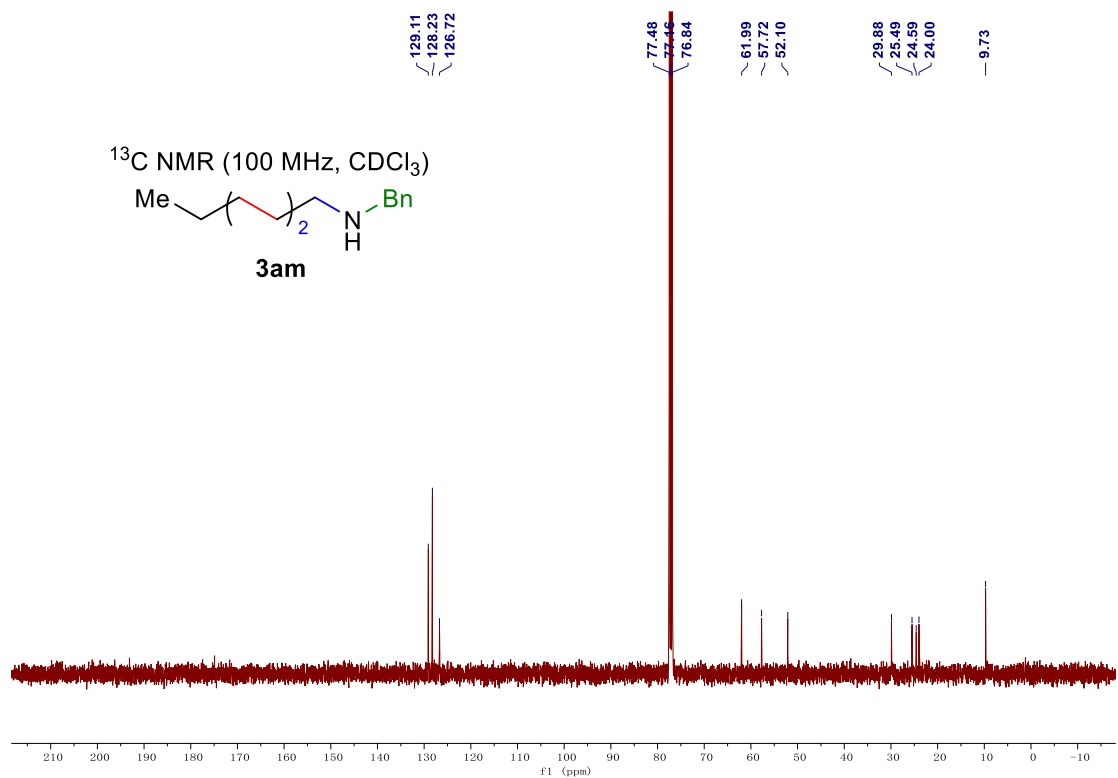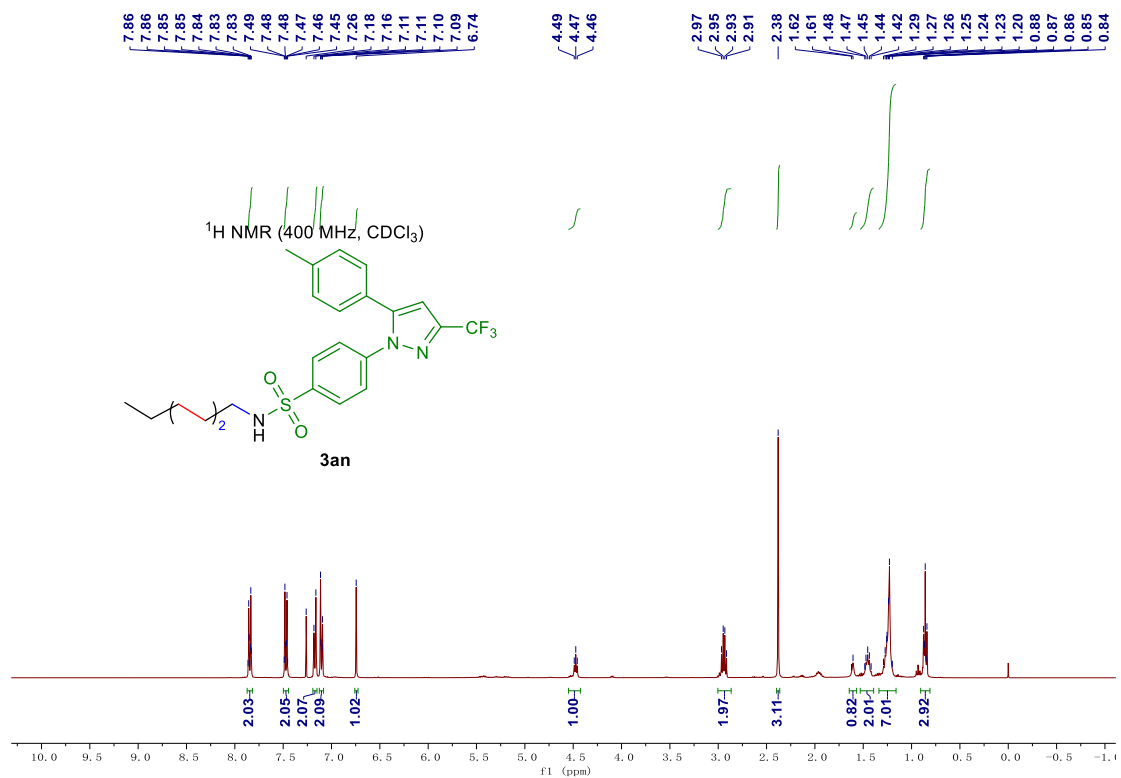

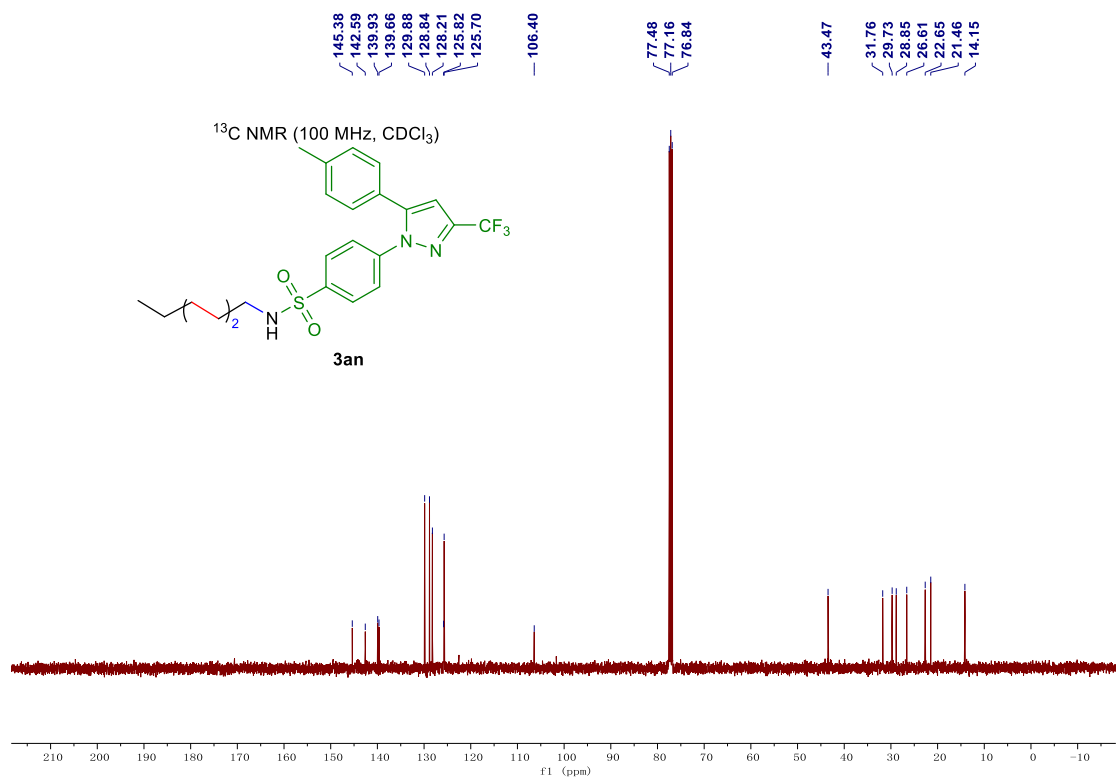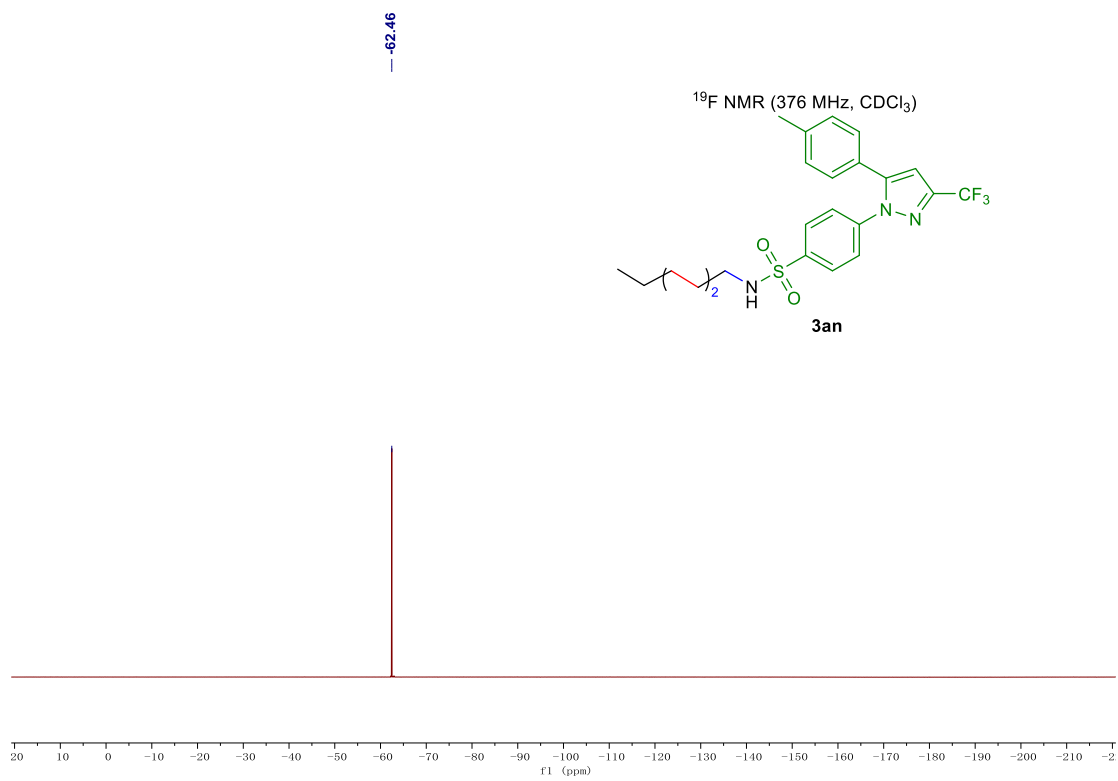

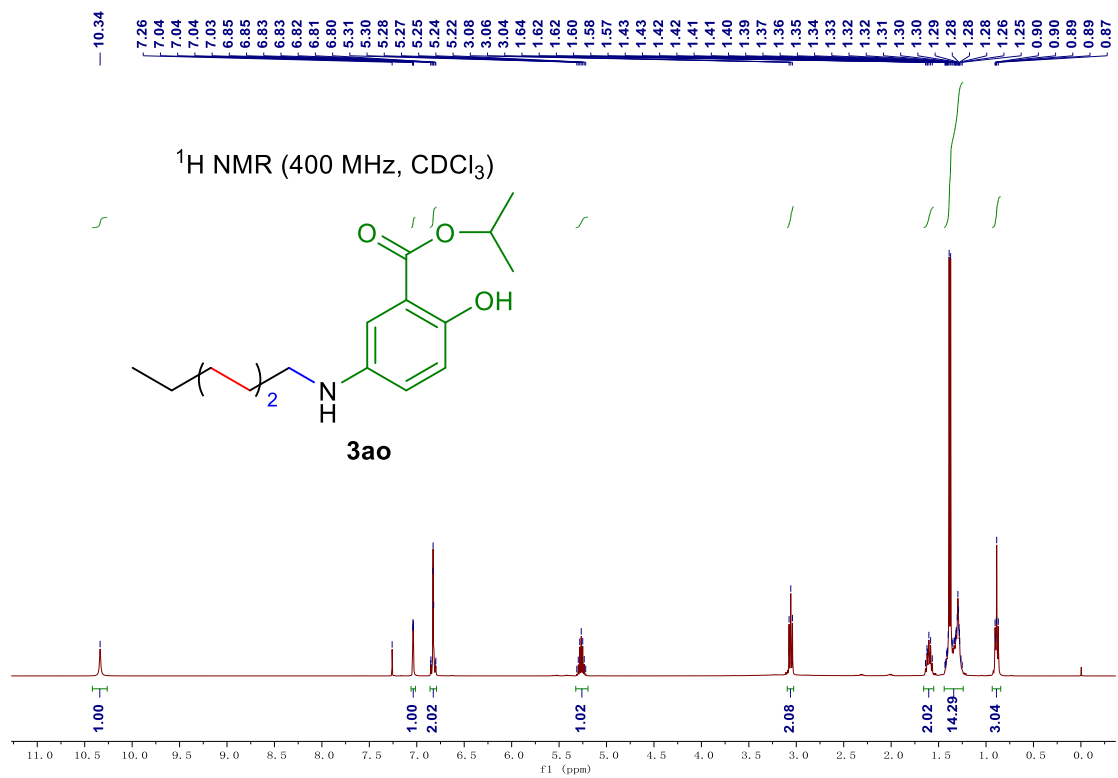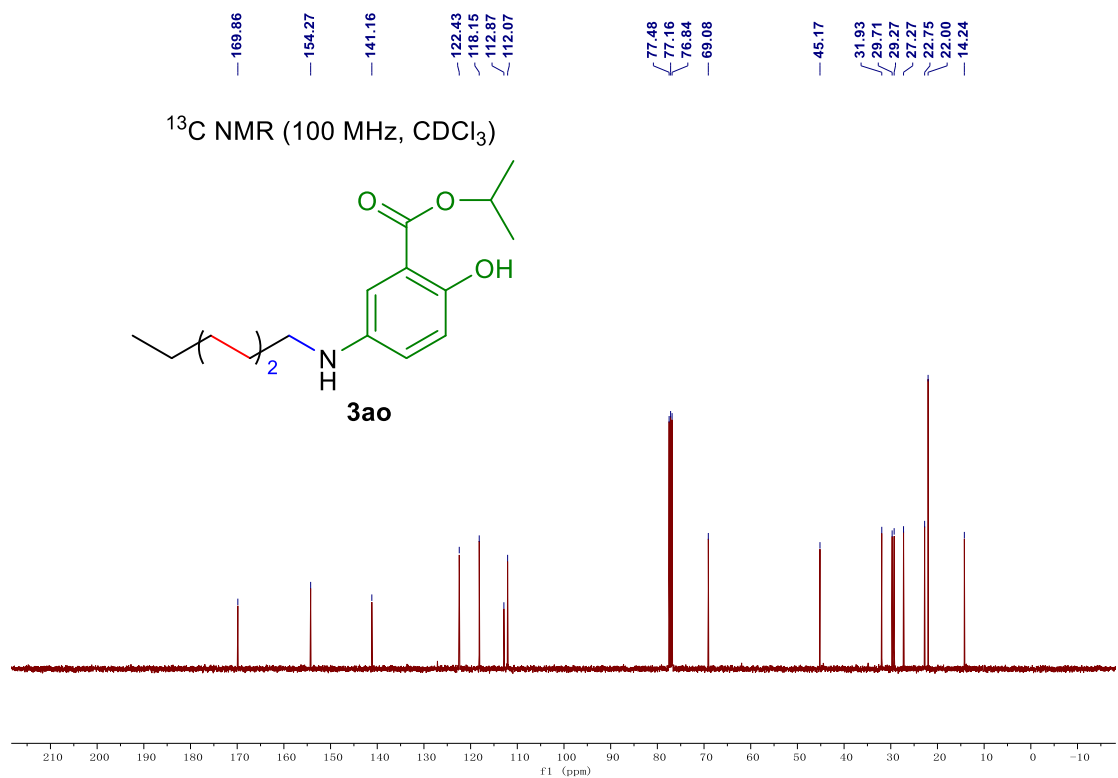

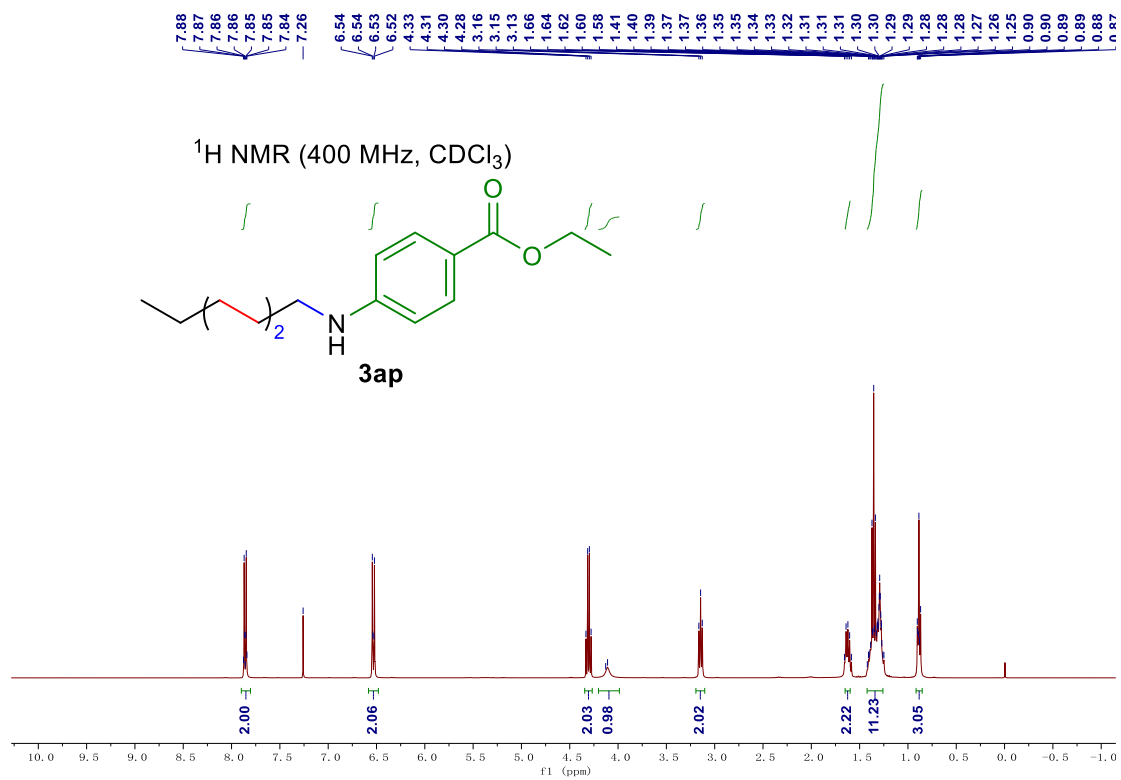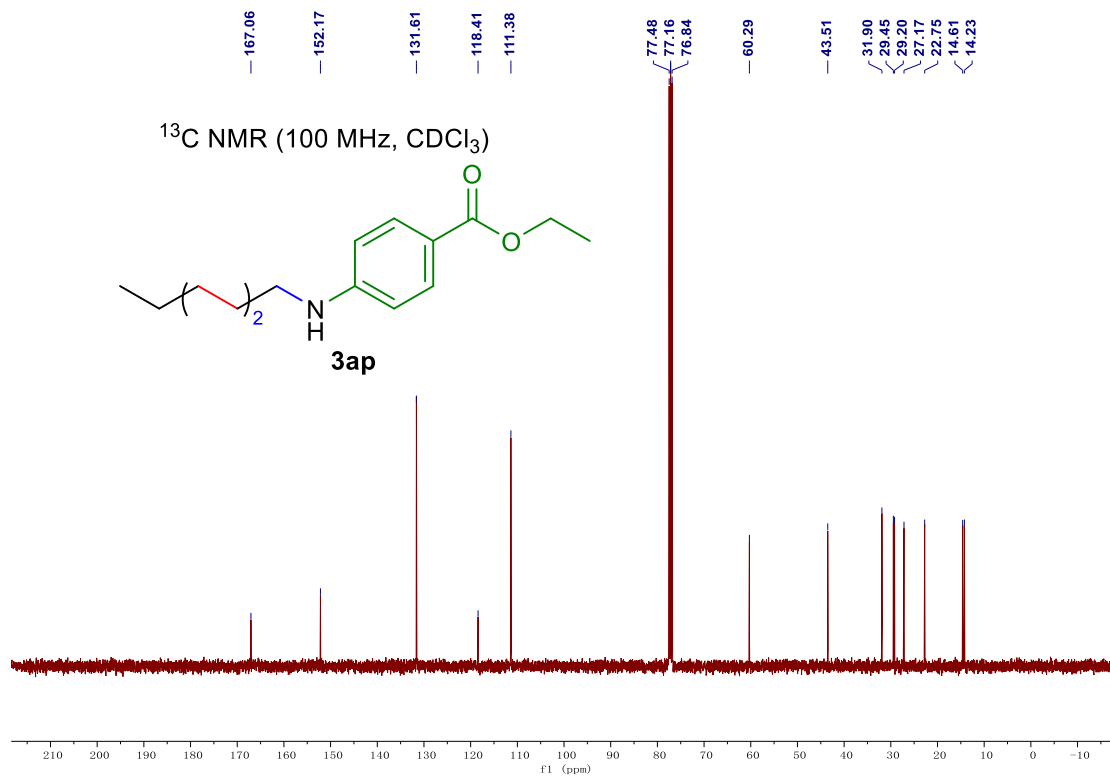

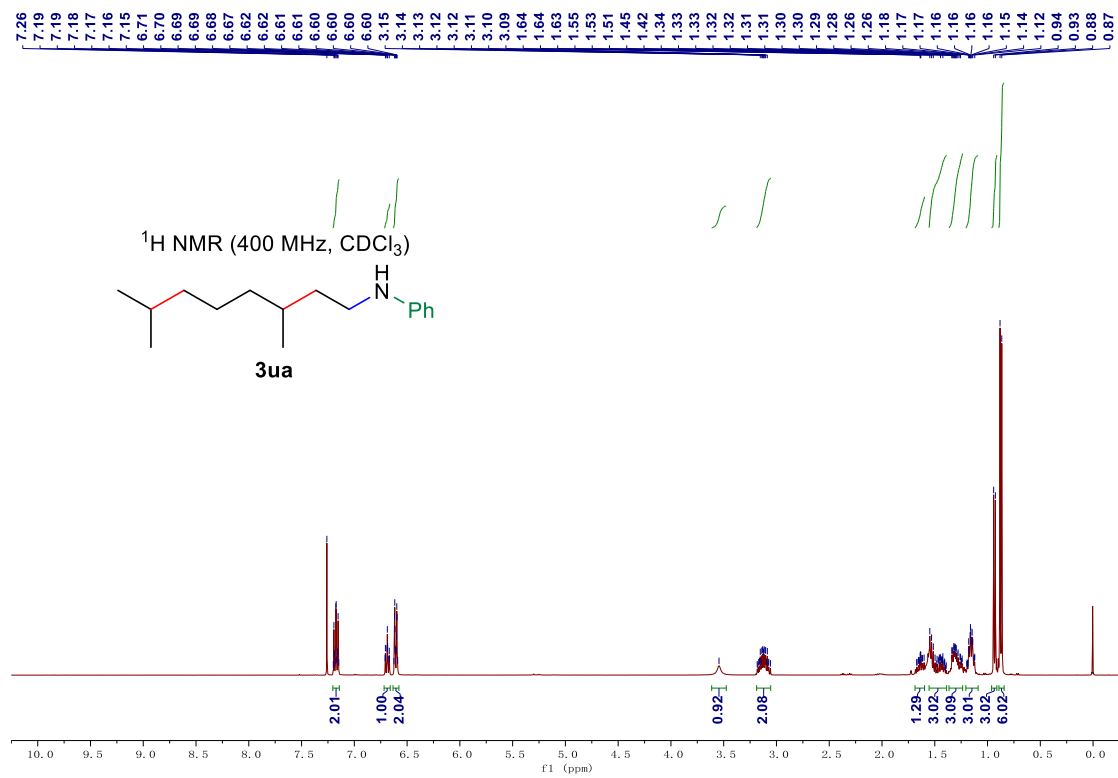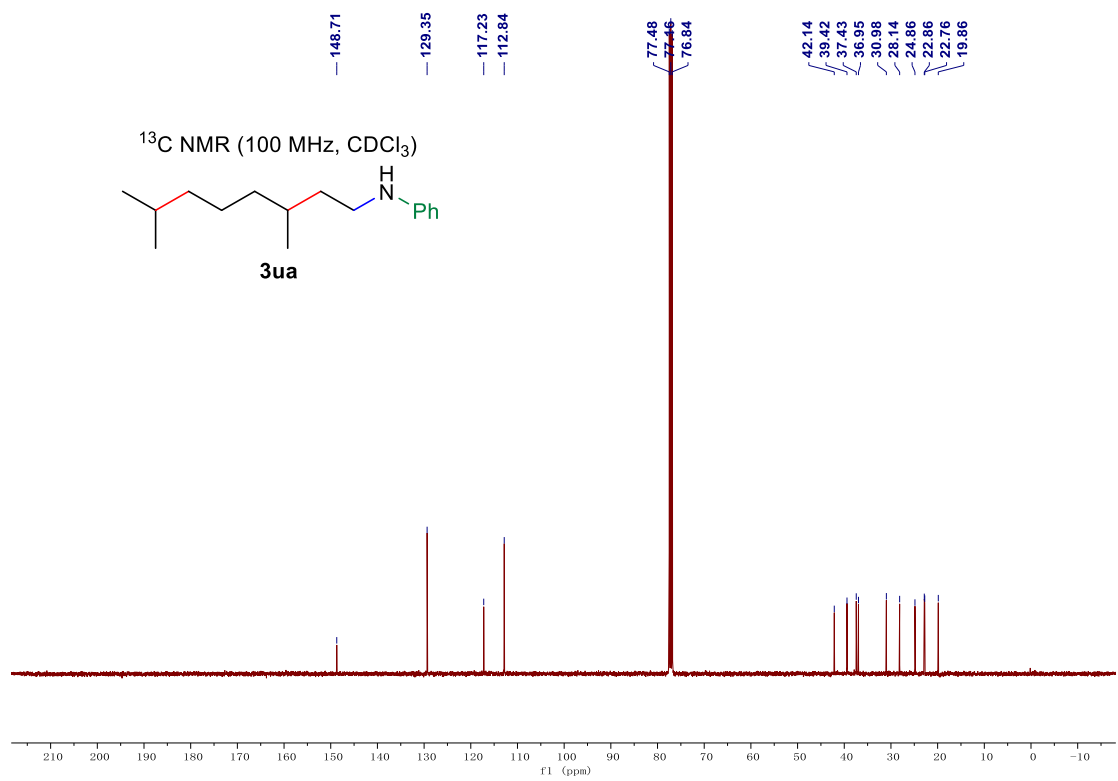



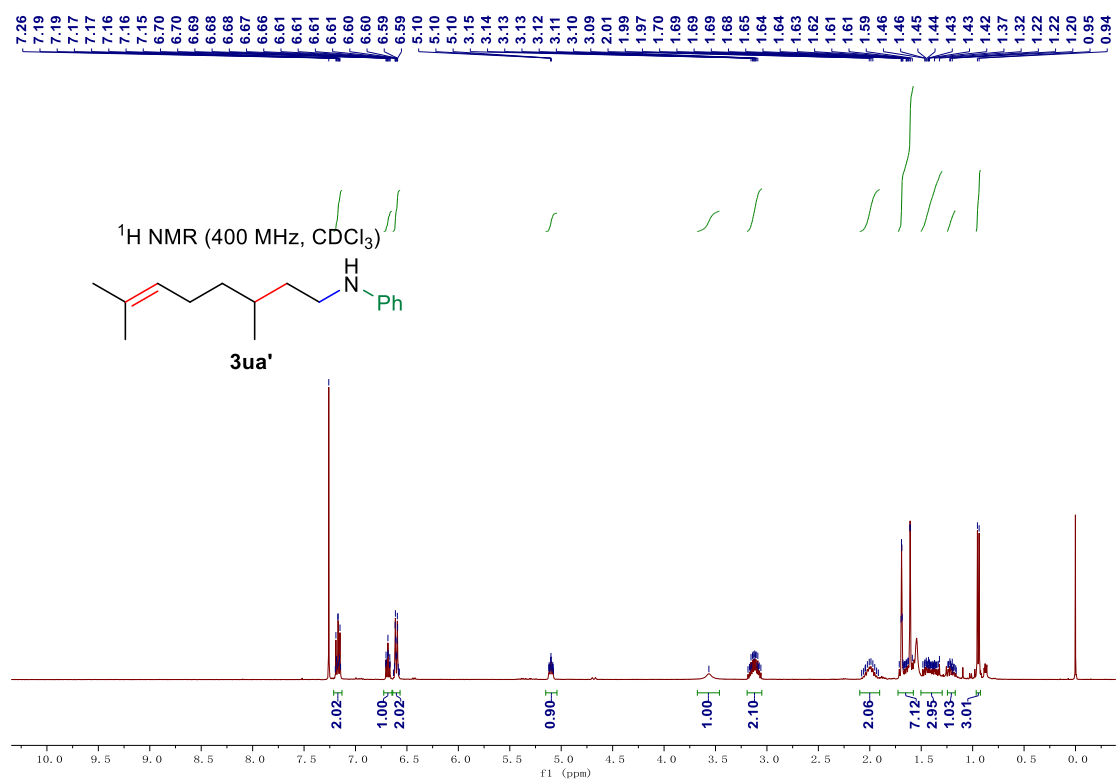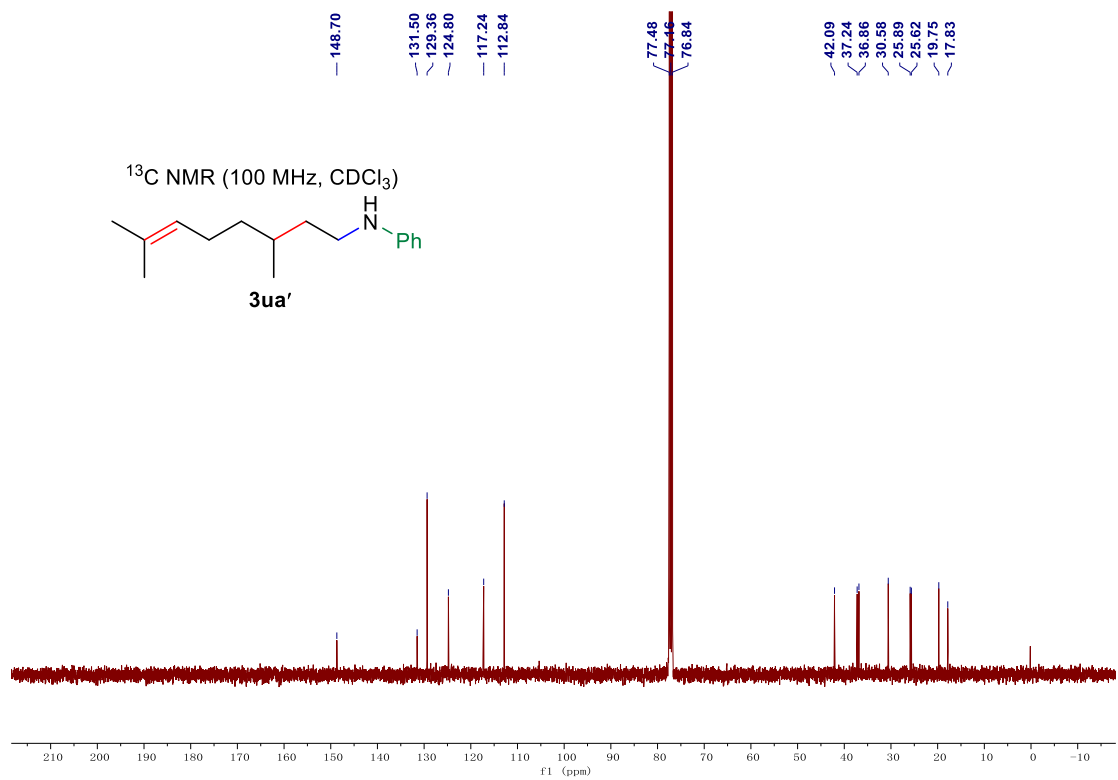

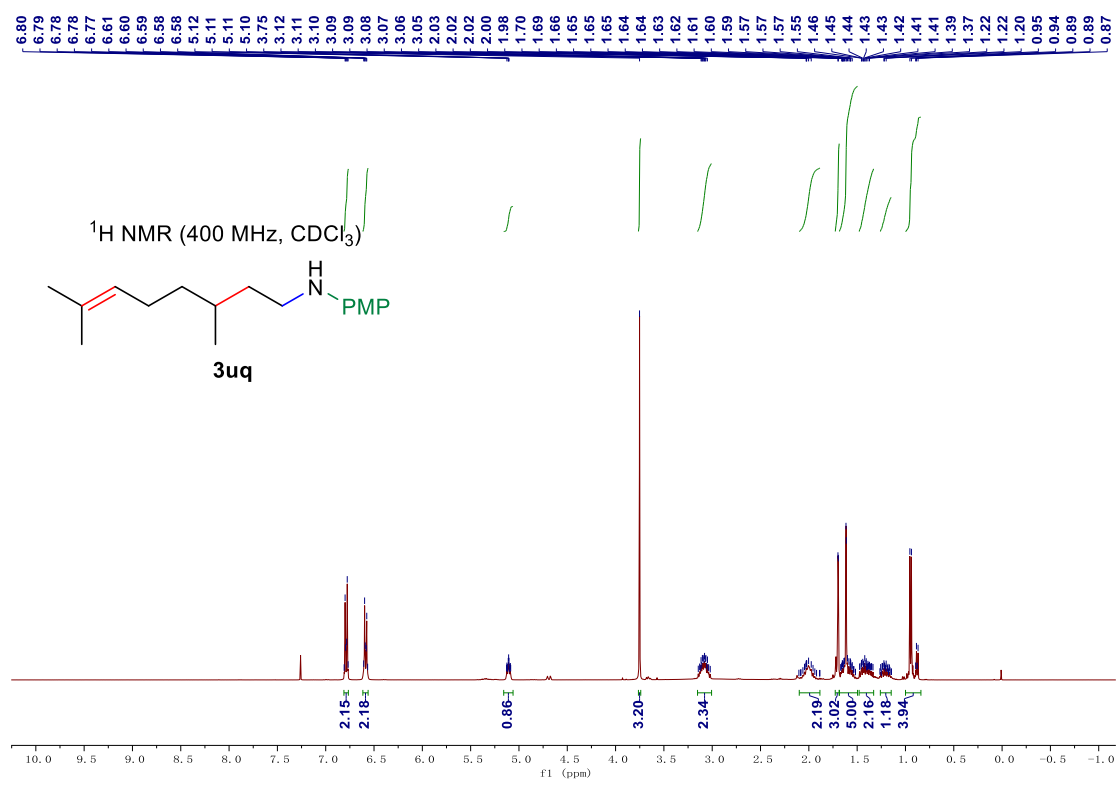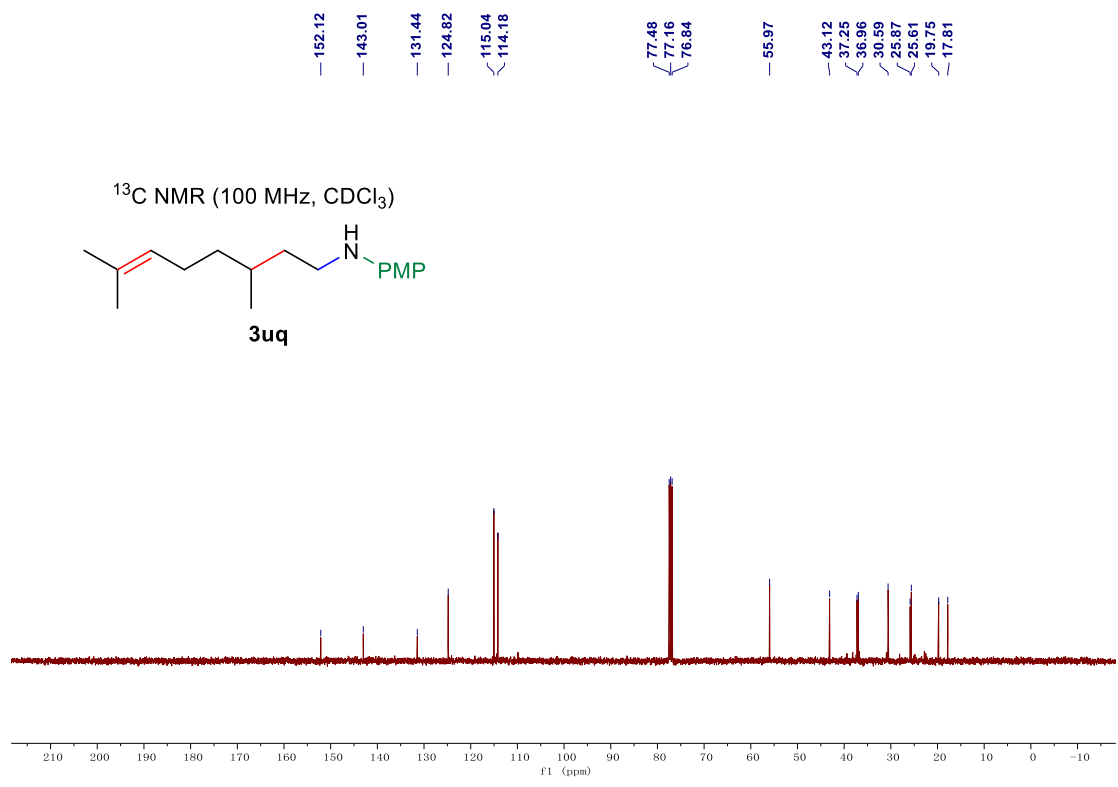

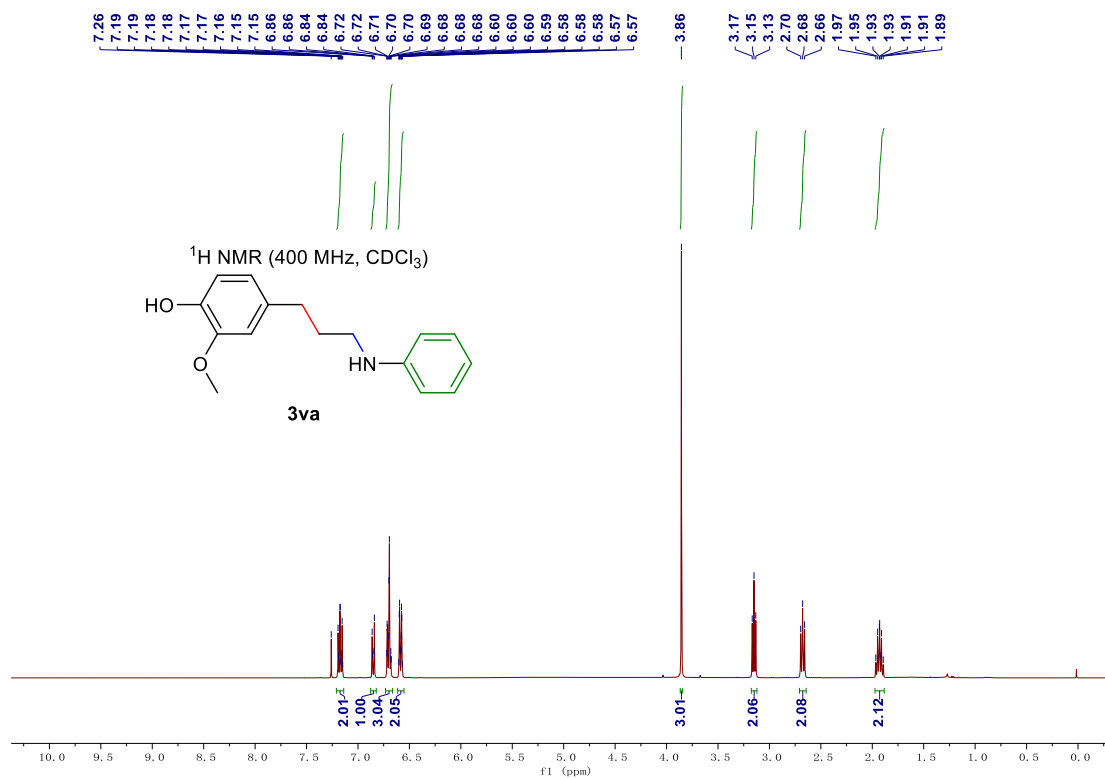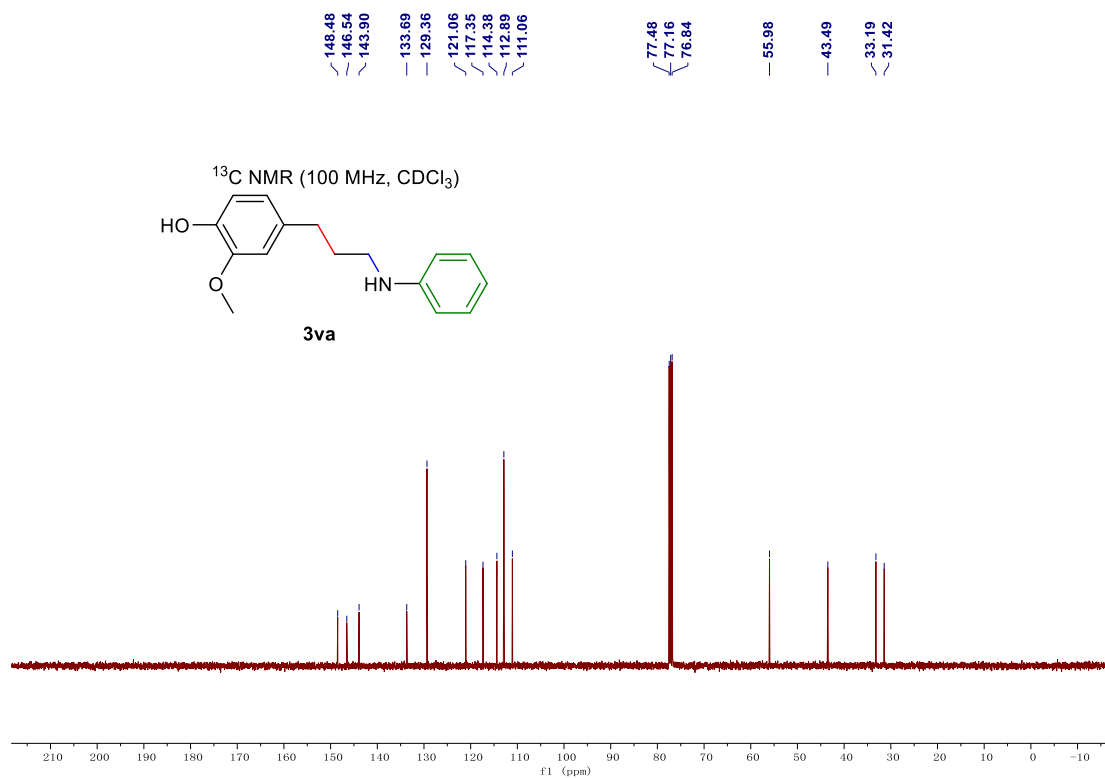

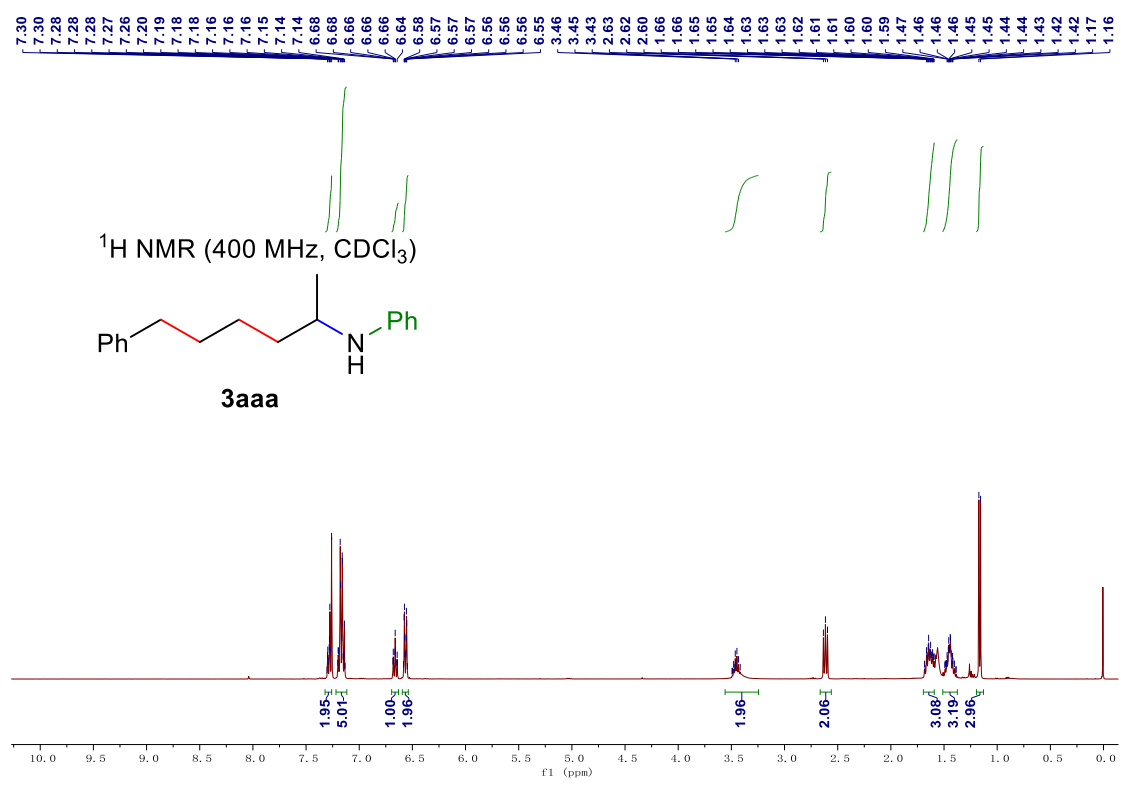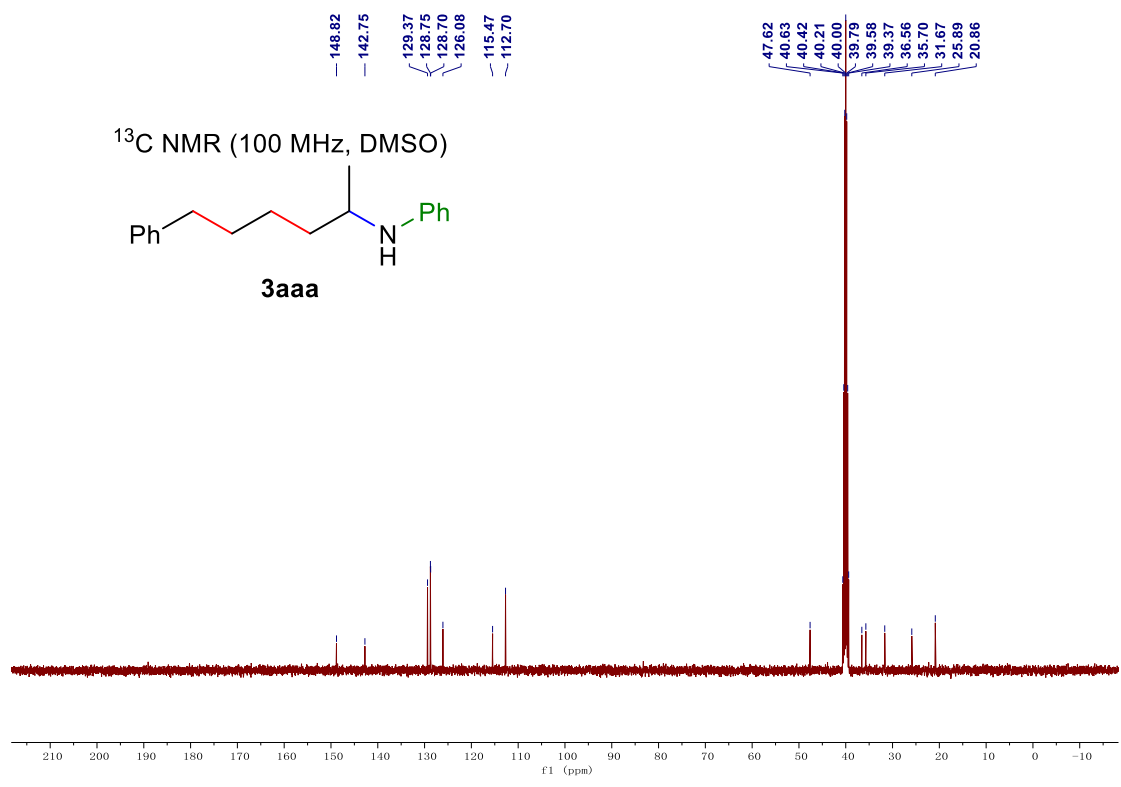

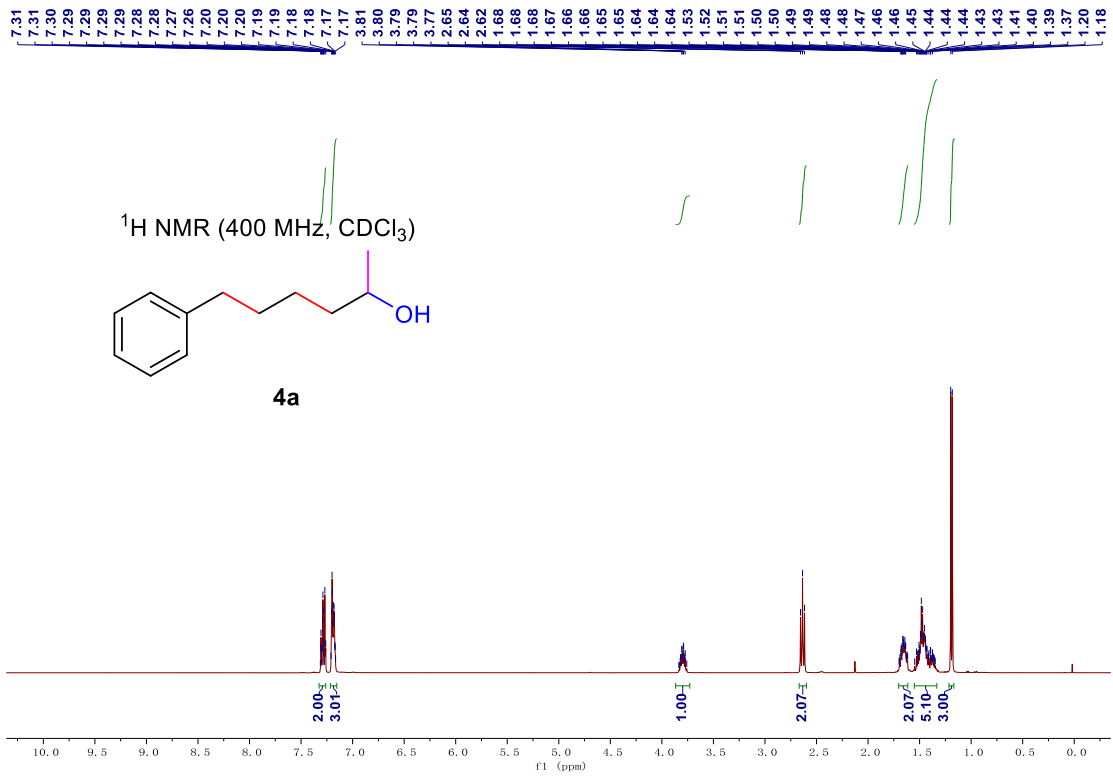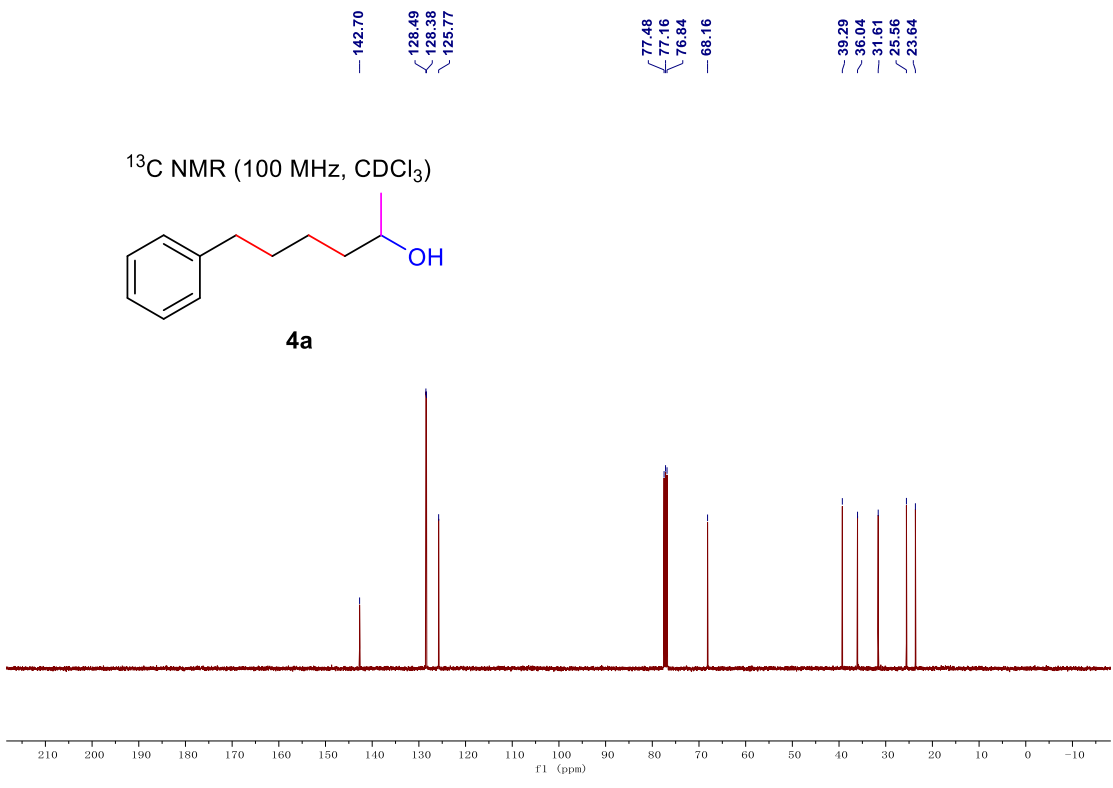

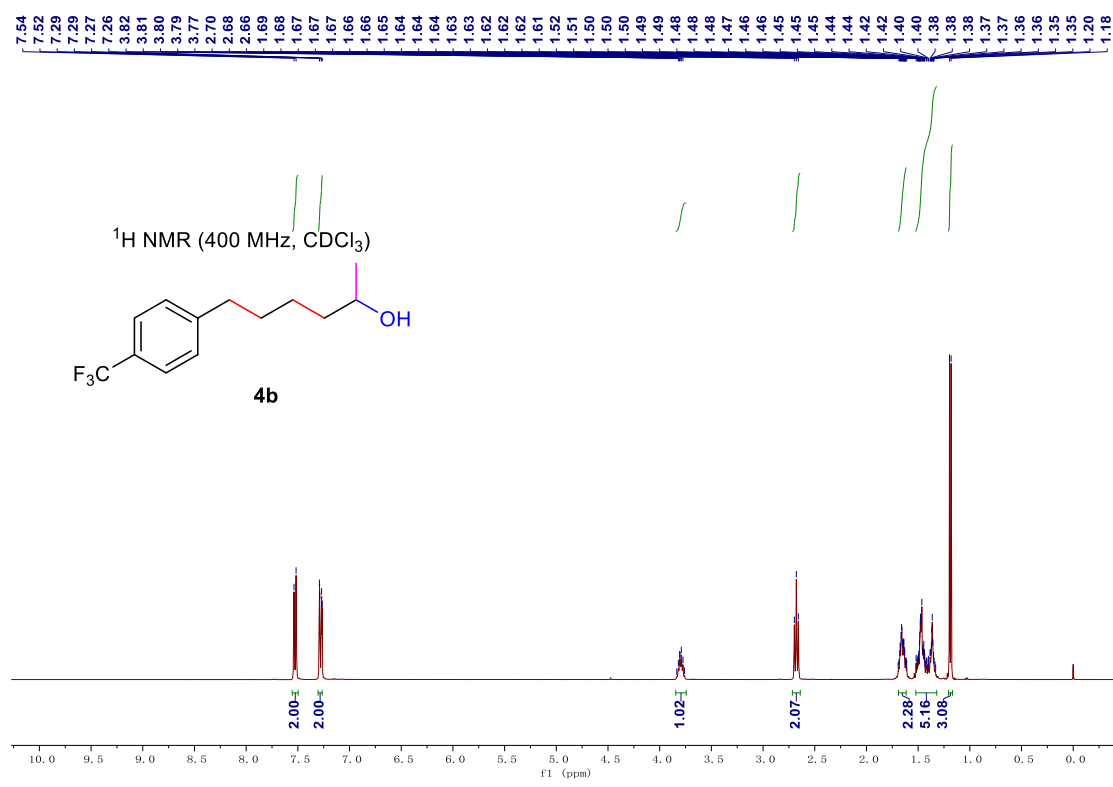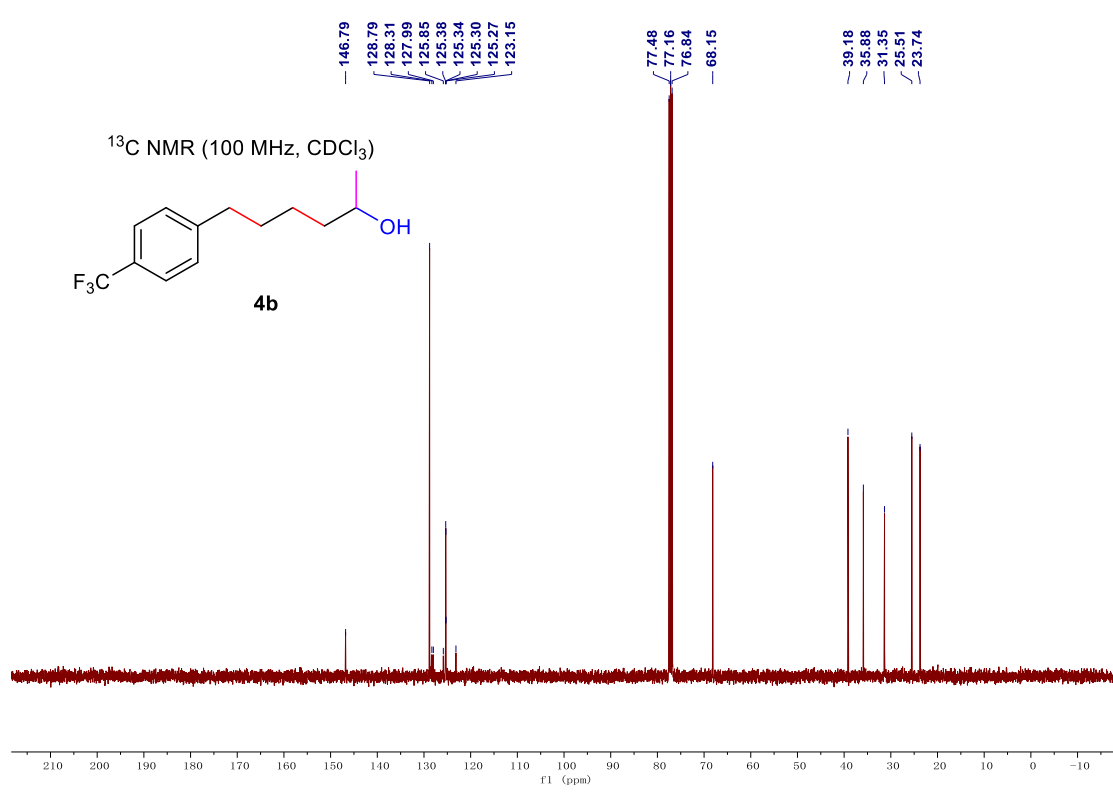

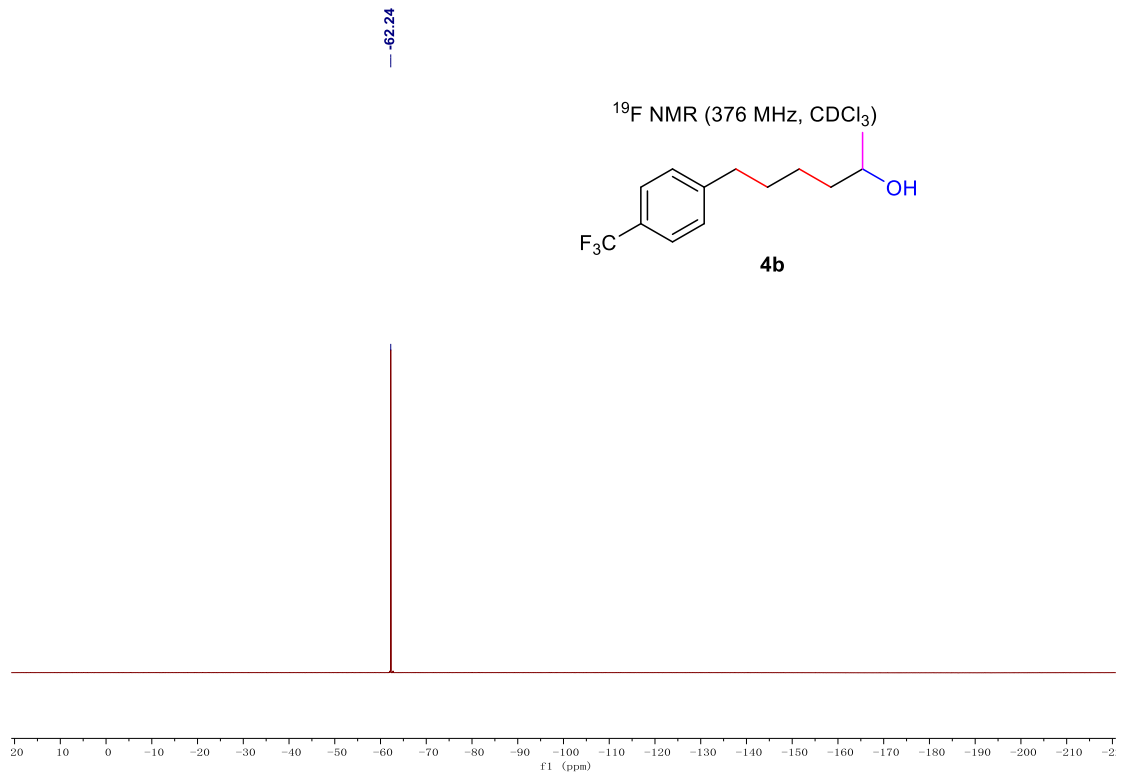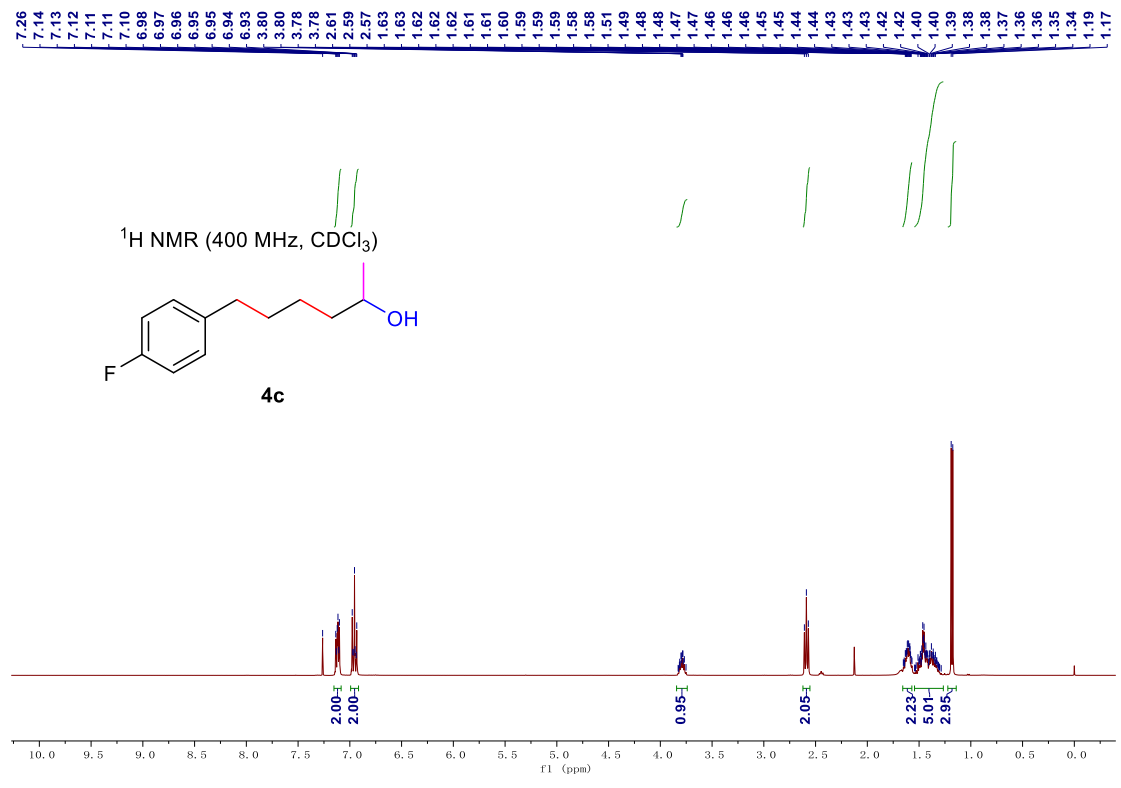

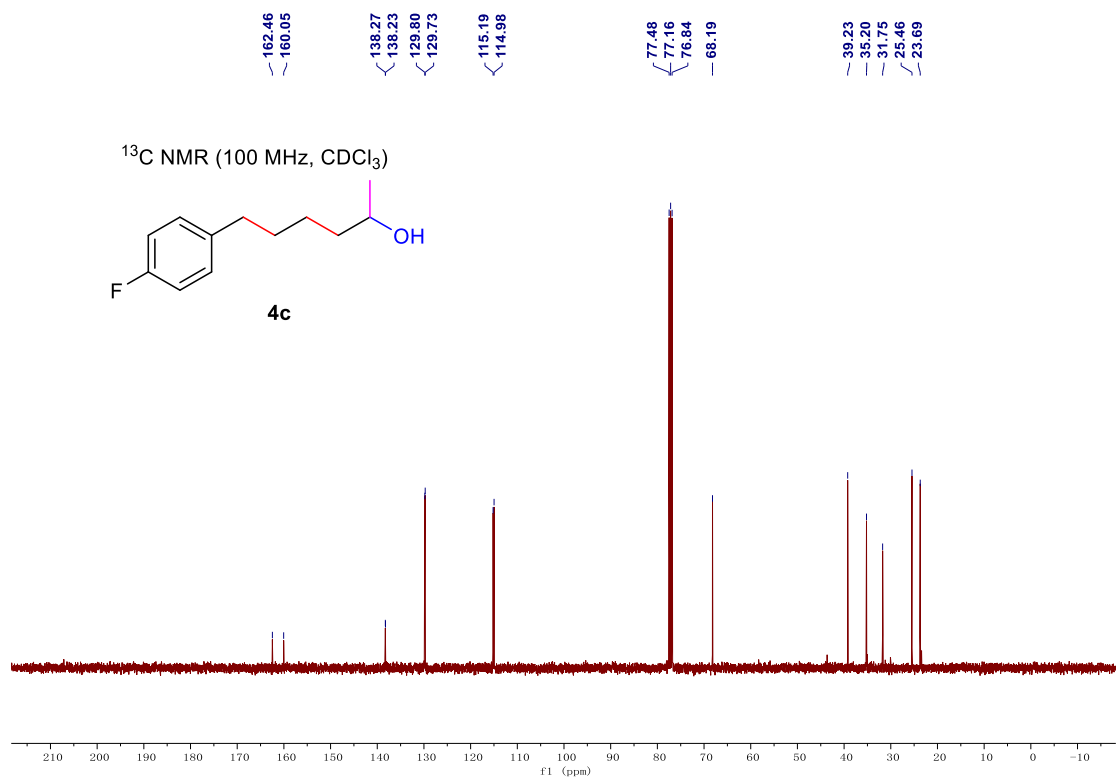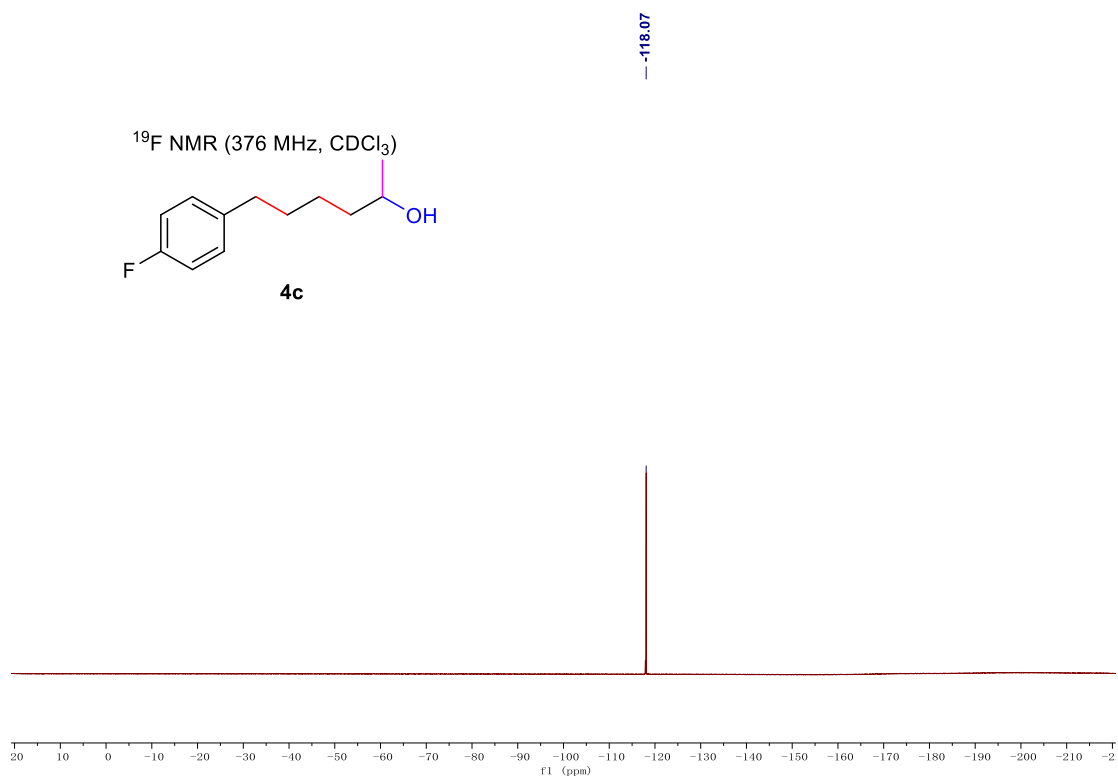



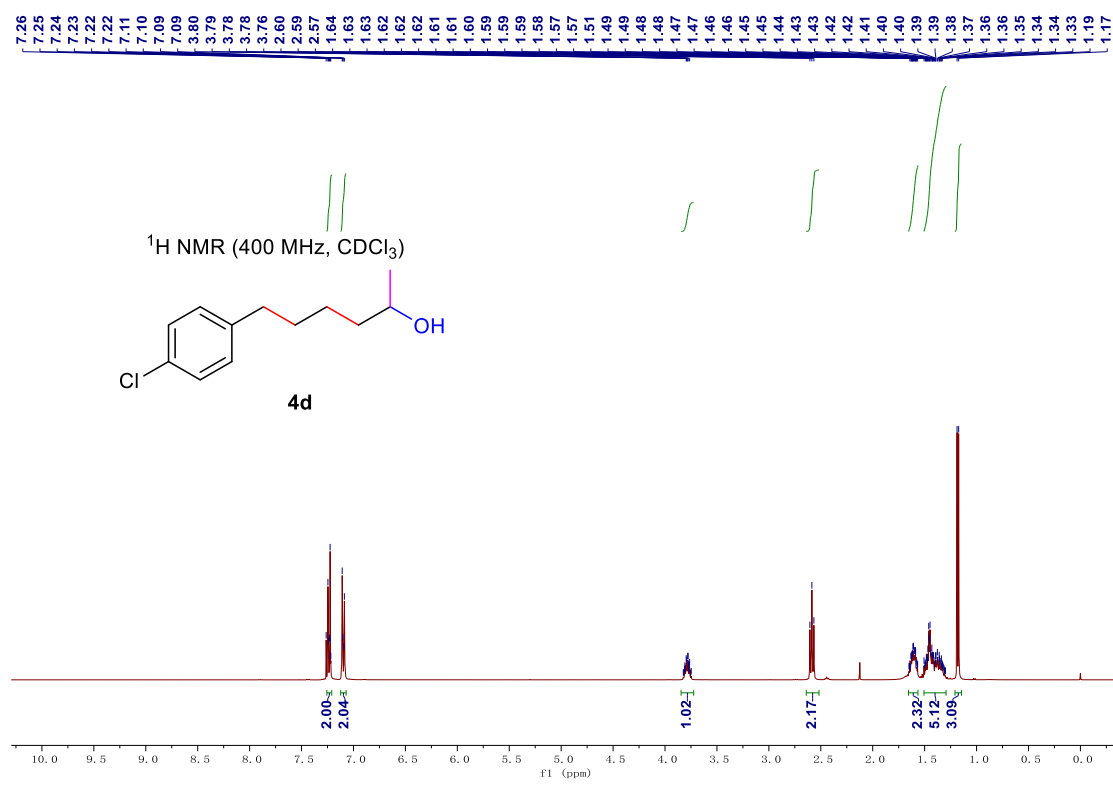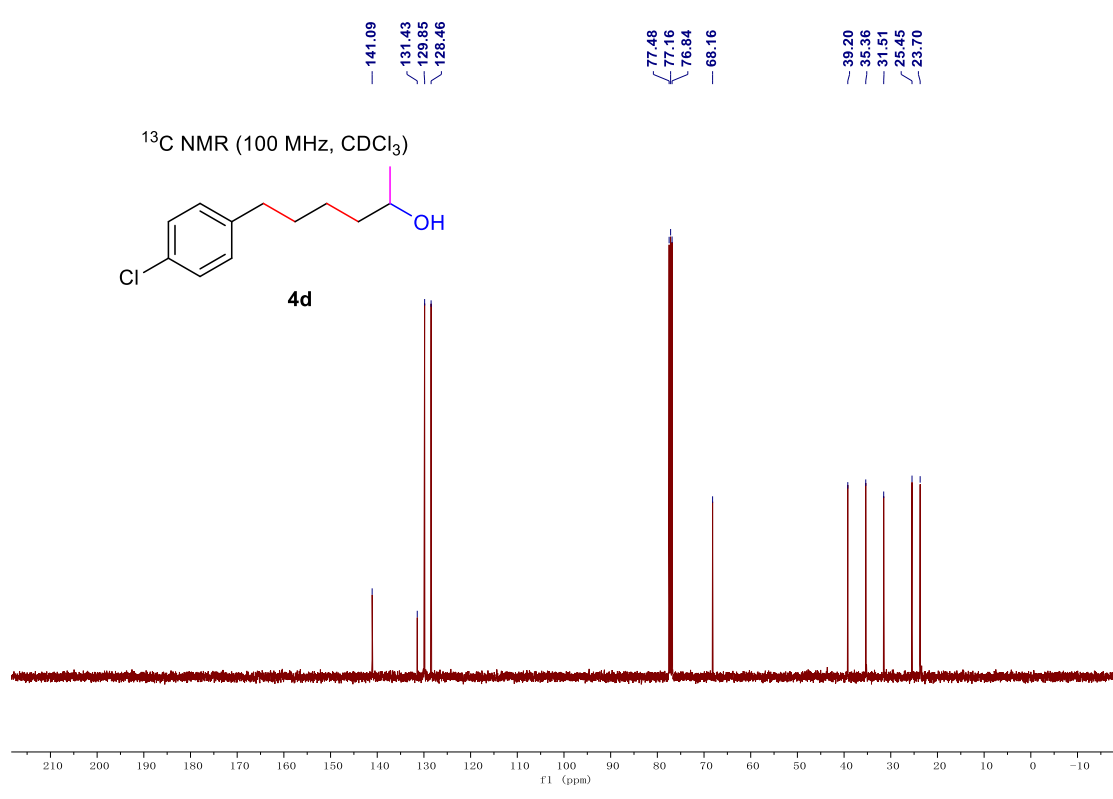

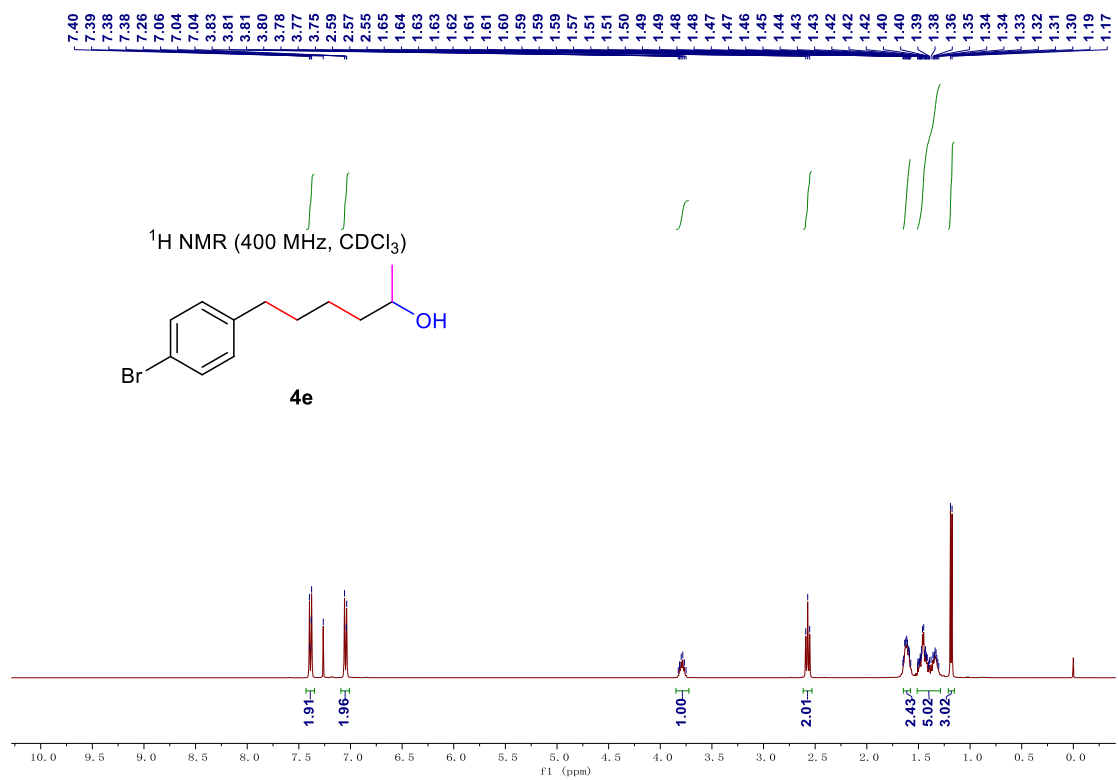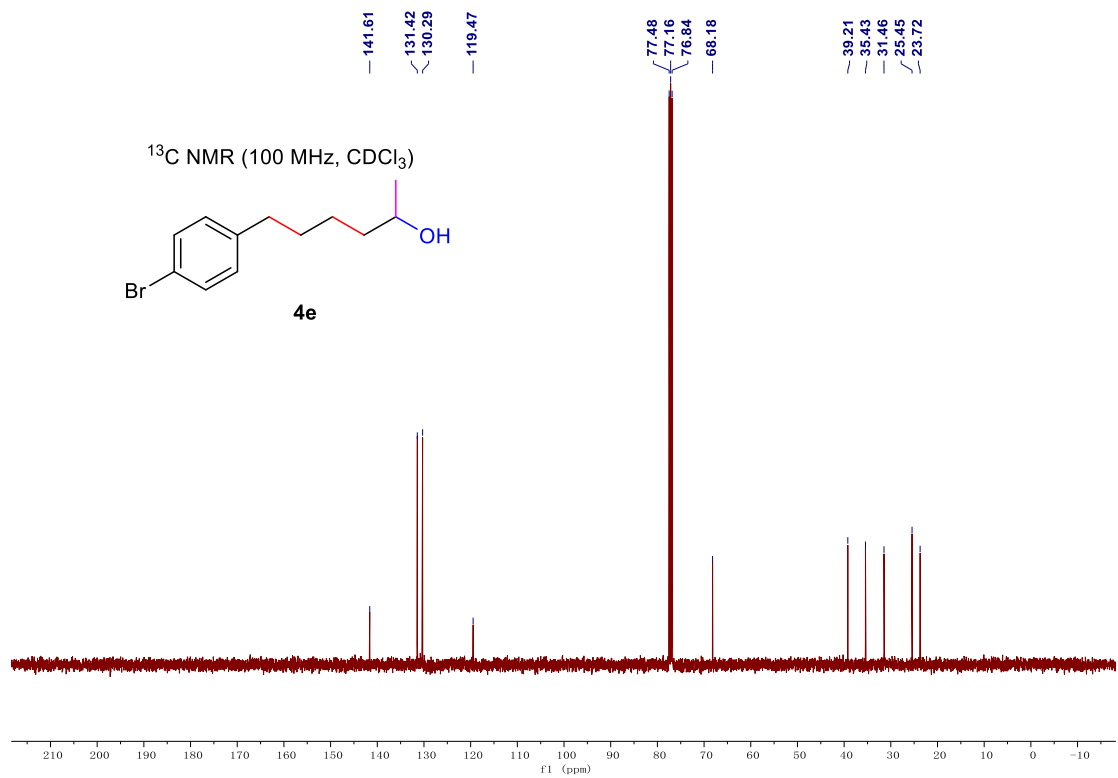

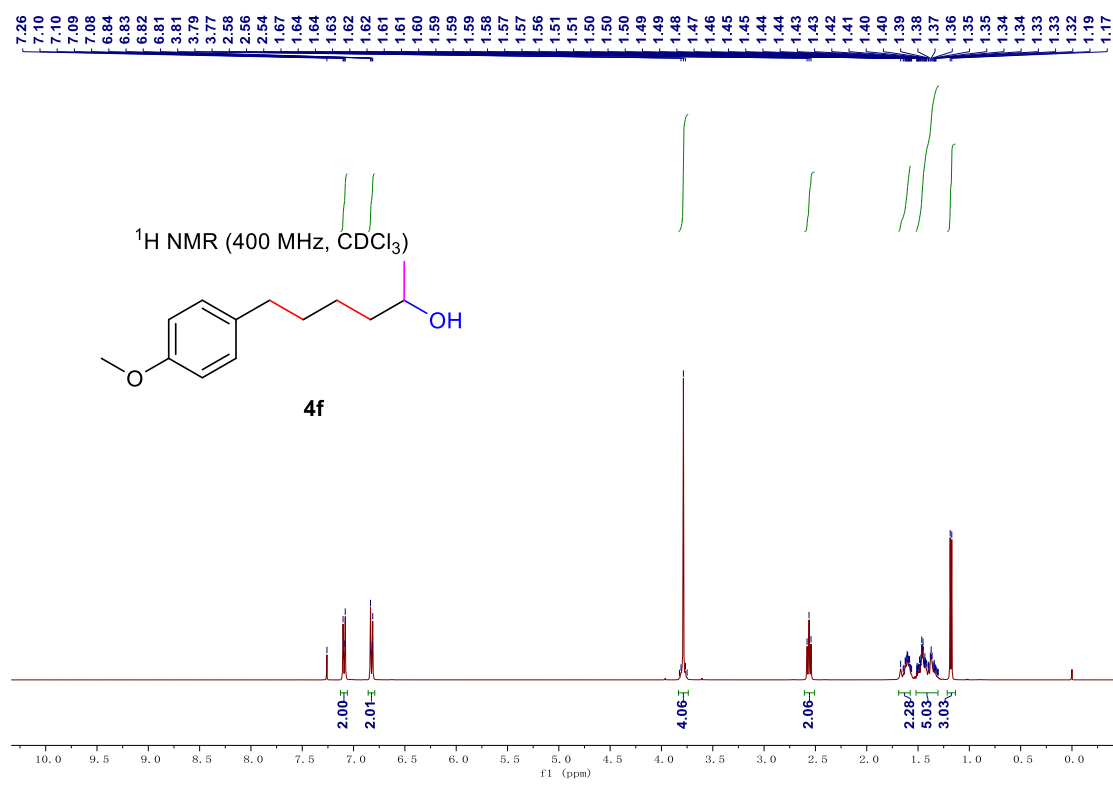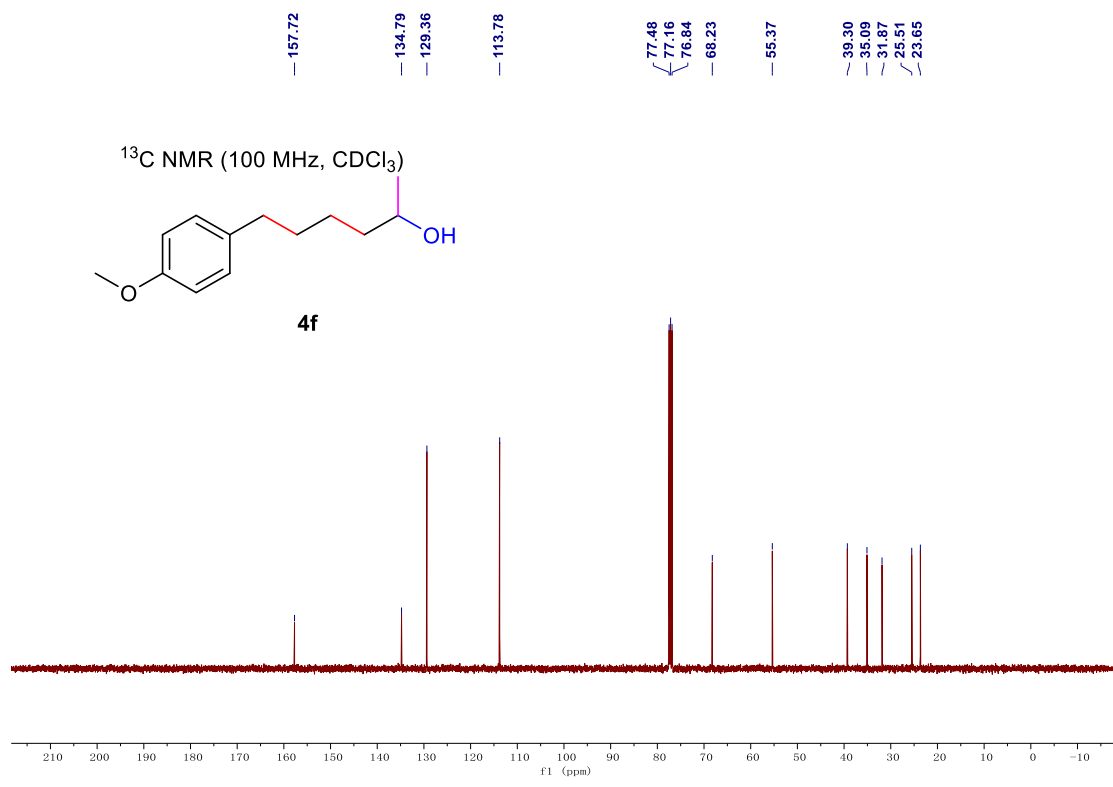

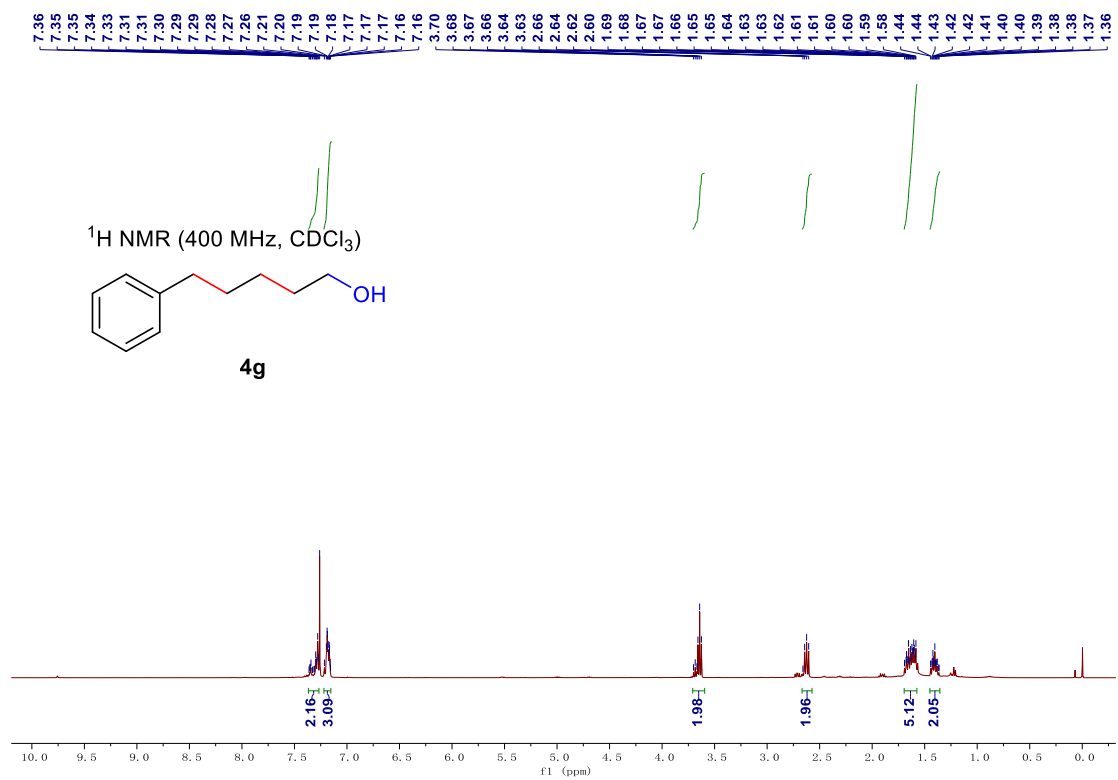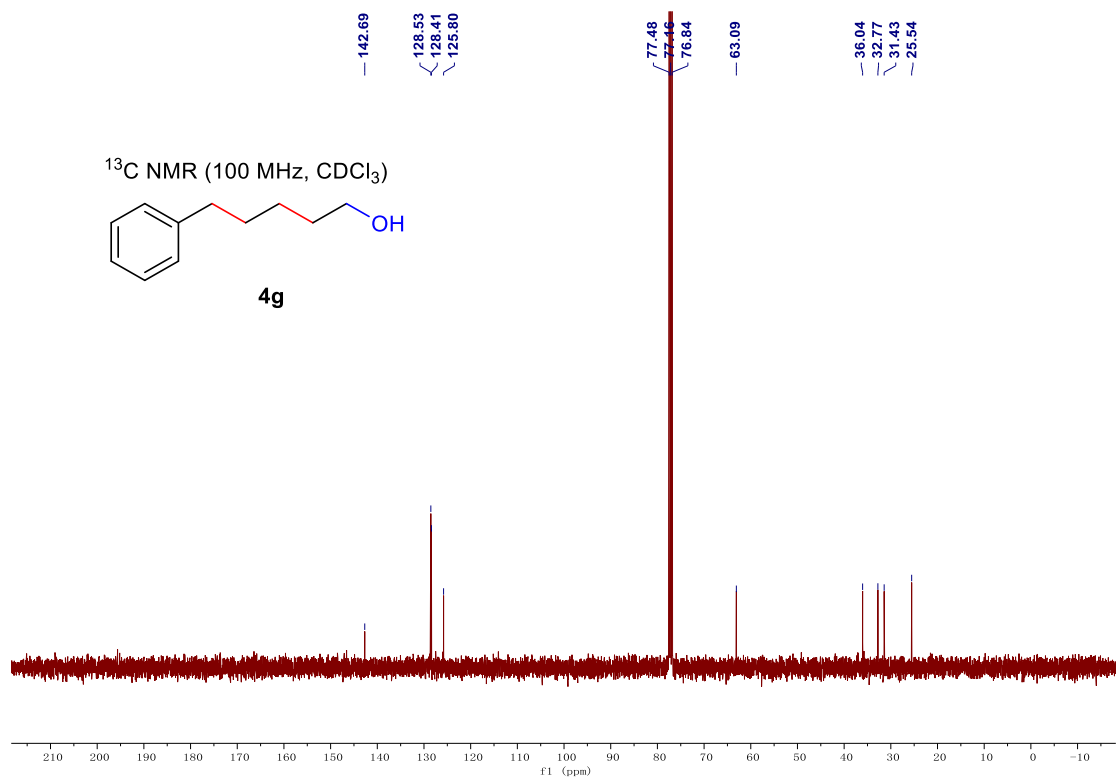

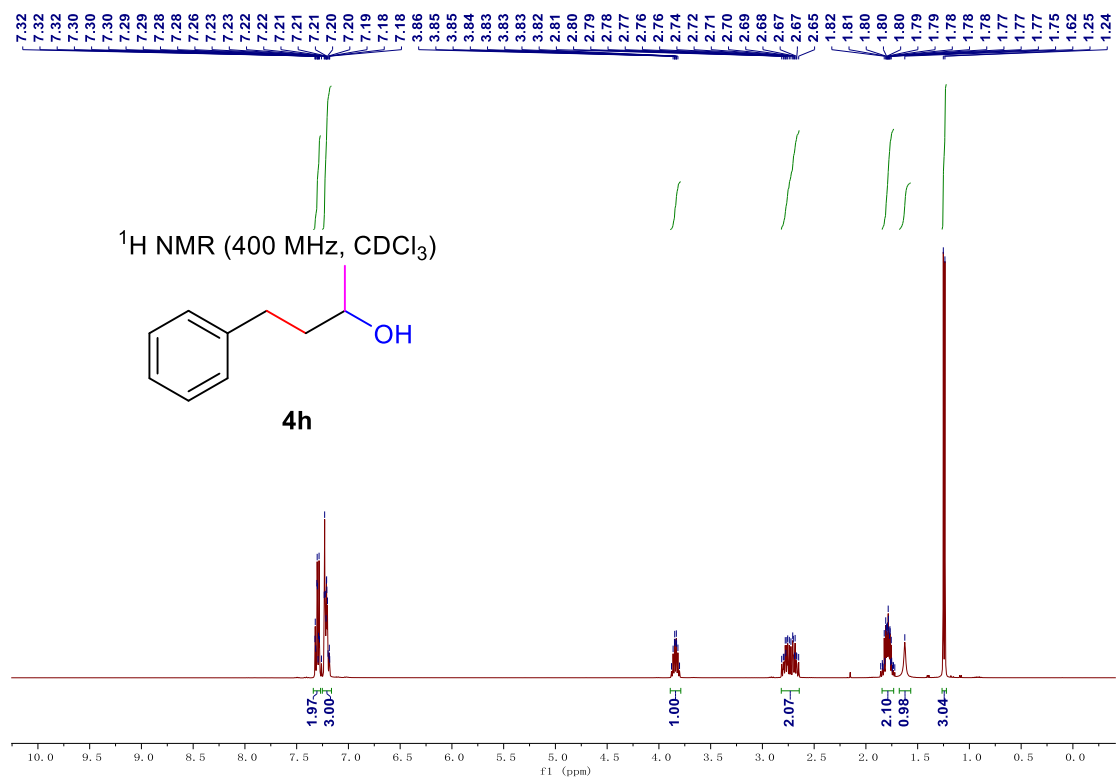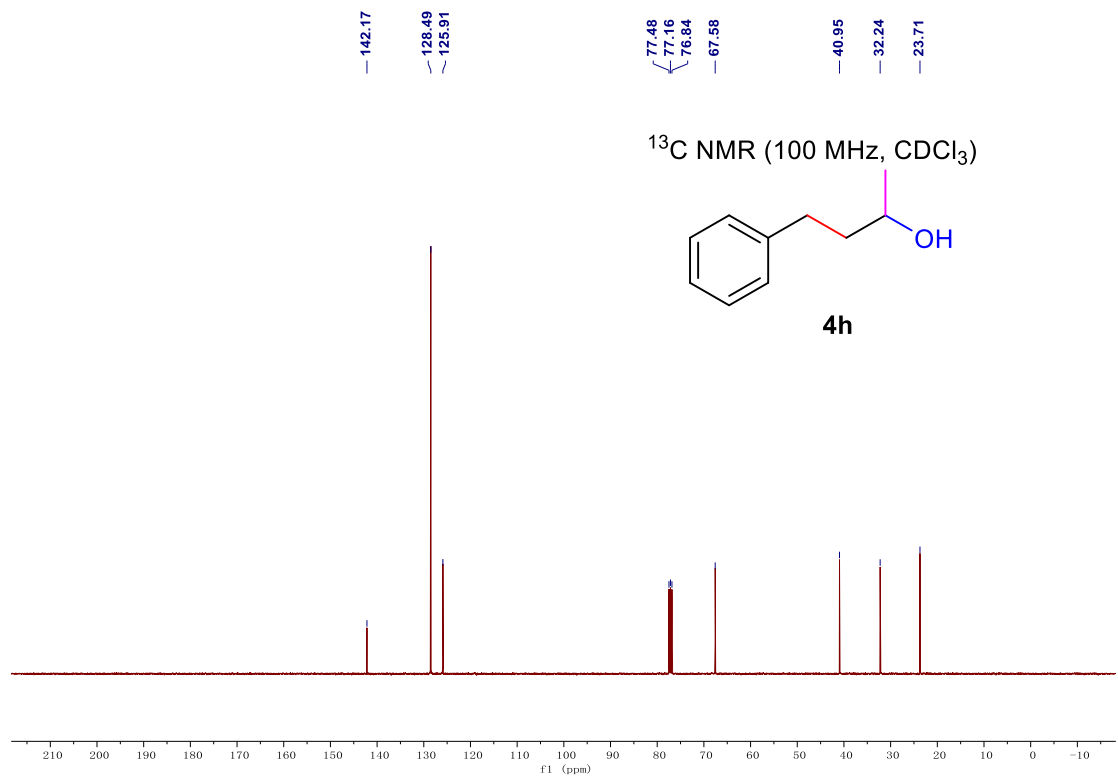

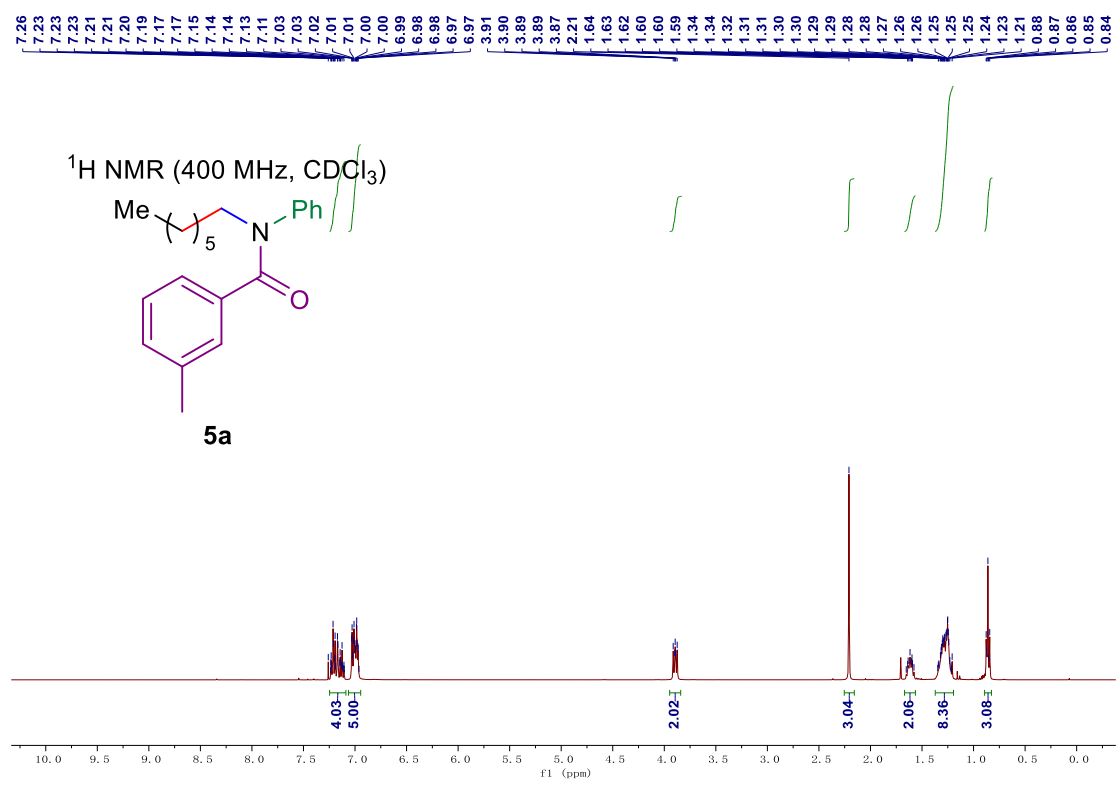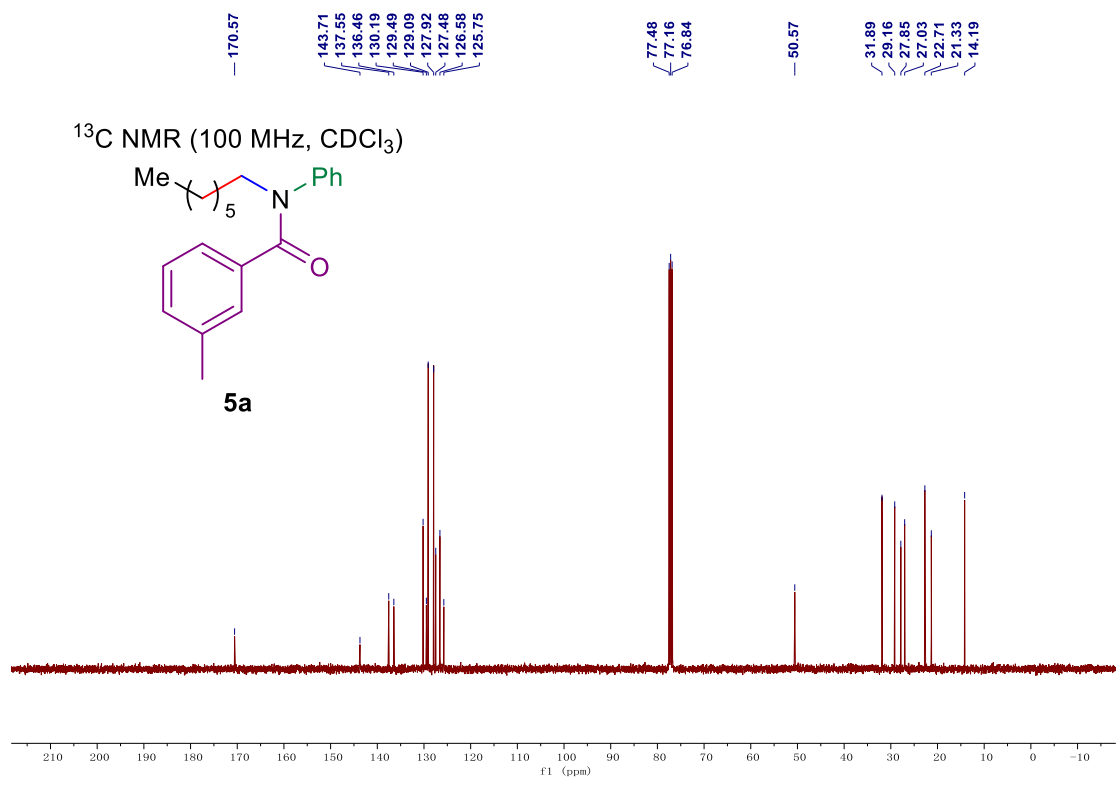

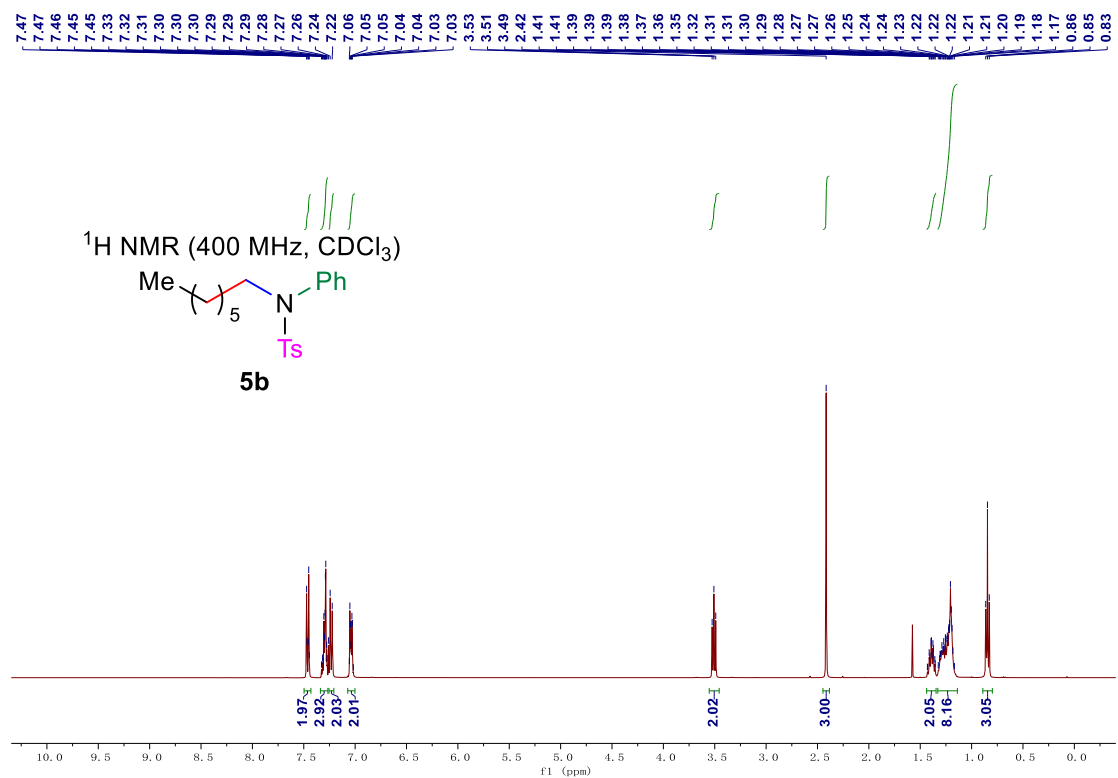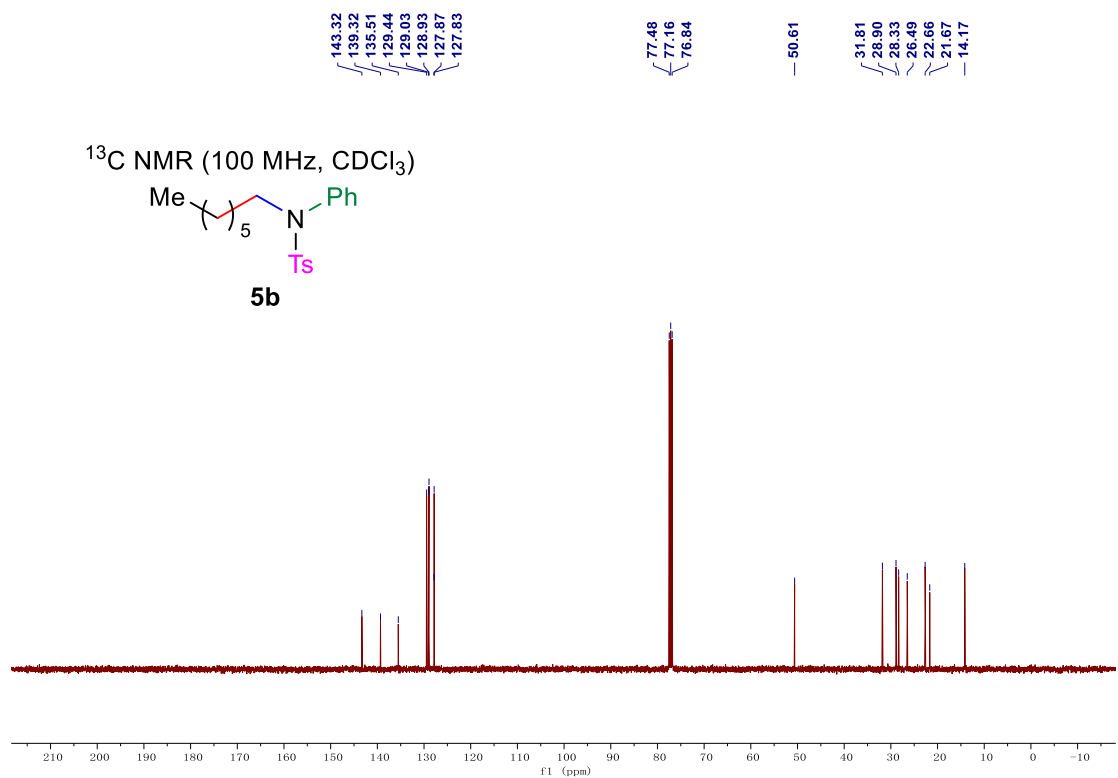

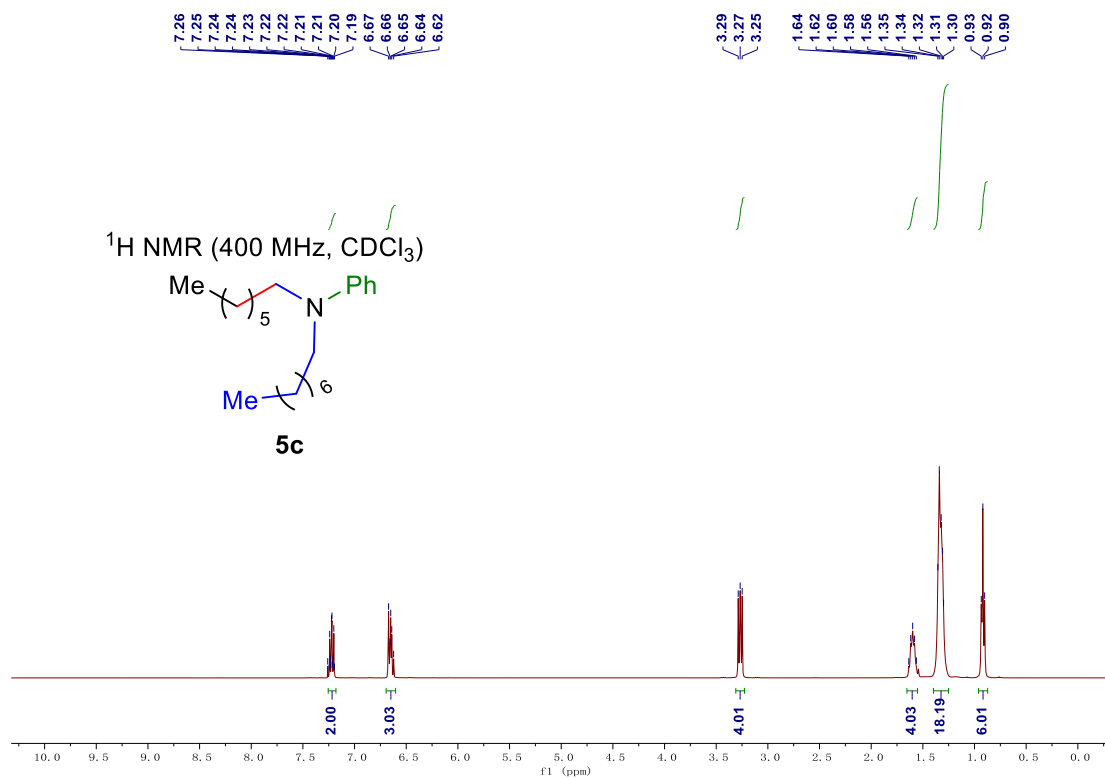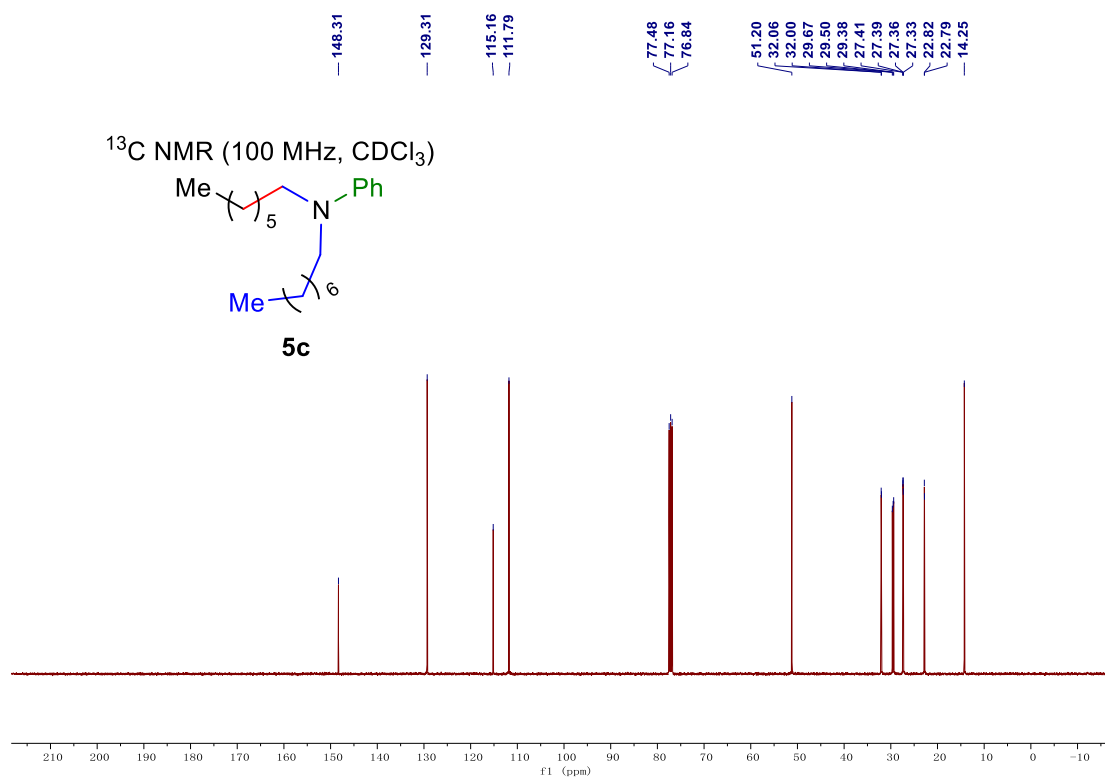



8.21  
8.20  
8.19  
8.18  
8.18  
7.90  
7.90  
7.89  
7.88  
7.78  
7.78  
7.76  
7.76  
7.76  
7.67  
7.66  
7.65  
7.65  
7.53  
7.53  
7.53  
7.51  
7.51  
7.50  
7.49  
7.48  
7.47  
7.45  
7.44  
7.44  
7.42  
7.36  
7.34  
7.34  
7.33  
7.32  
7.32  
7.30  
7.26  
4.64  
4.64  
2.74  
2.72  
2.71  
2.70  
2.69  
2.69  
2.67  
2.67  
2.66  
2.64  
2.63  
2.63  
2.61  
2.60  
2.59  
1.89  
1.87  
1.85  
1.83  
1.52  
1.50

<sup>1</sup>H NMR (400 MHz, CDCl<sub>3</sub>)

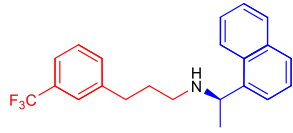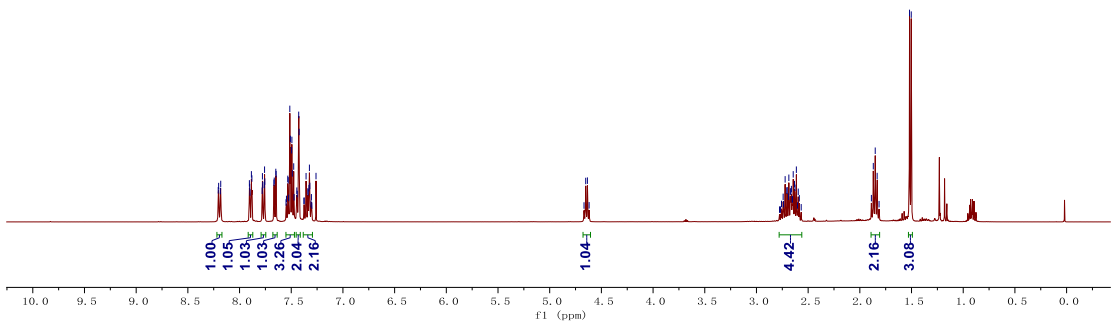

143.15  
141.19  
134.06  
131.90  
131.89  
131.38  
131.12  
130.80  
130.48  
130.17  
129.12  
128.79  
127.33  
125.92  
125.82  
125.72  
125.46  
125.21  
125.17  
125.13  
125.10  
123.02  
122.98  
122.81  
122.77  
122.74  
122.71  
77.48  
77.16  
76.84

<sup>13</sup>C NMR (100 MHz, CDCl<sub>3</sub>)

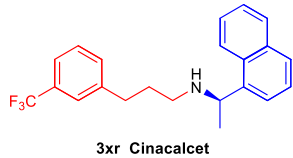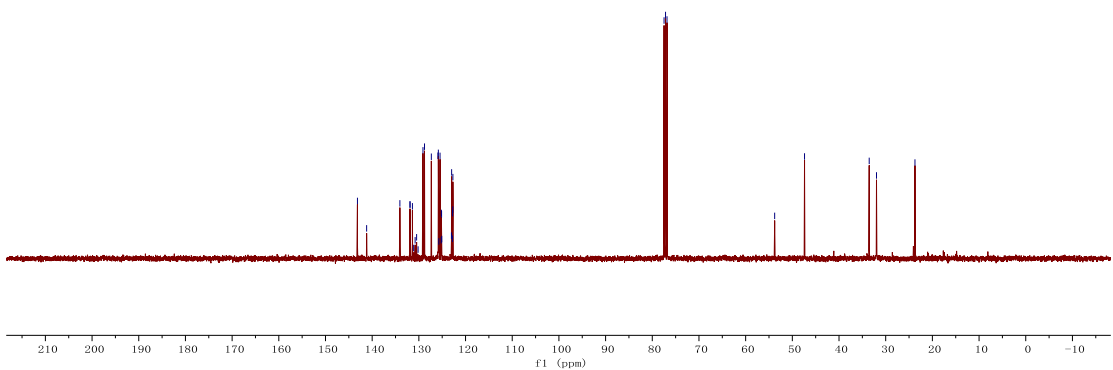

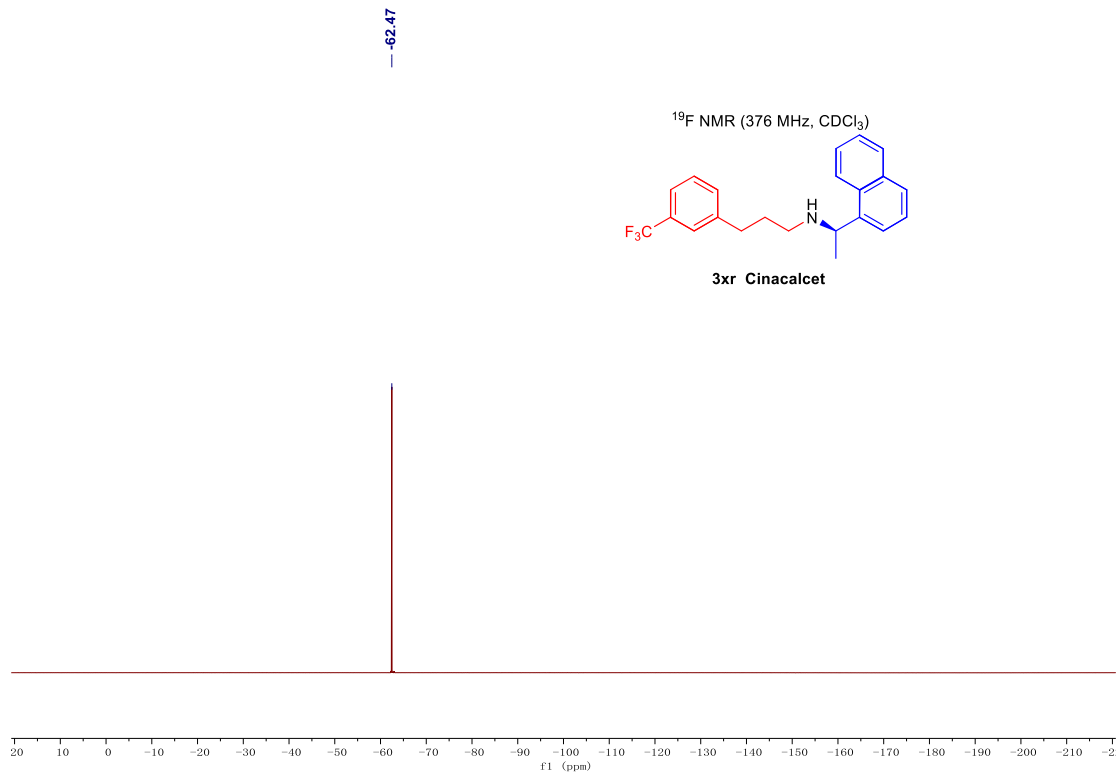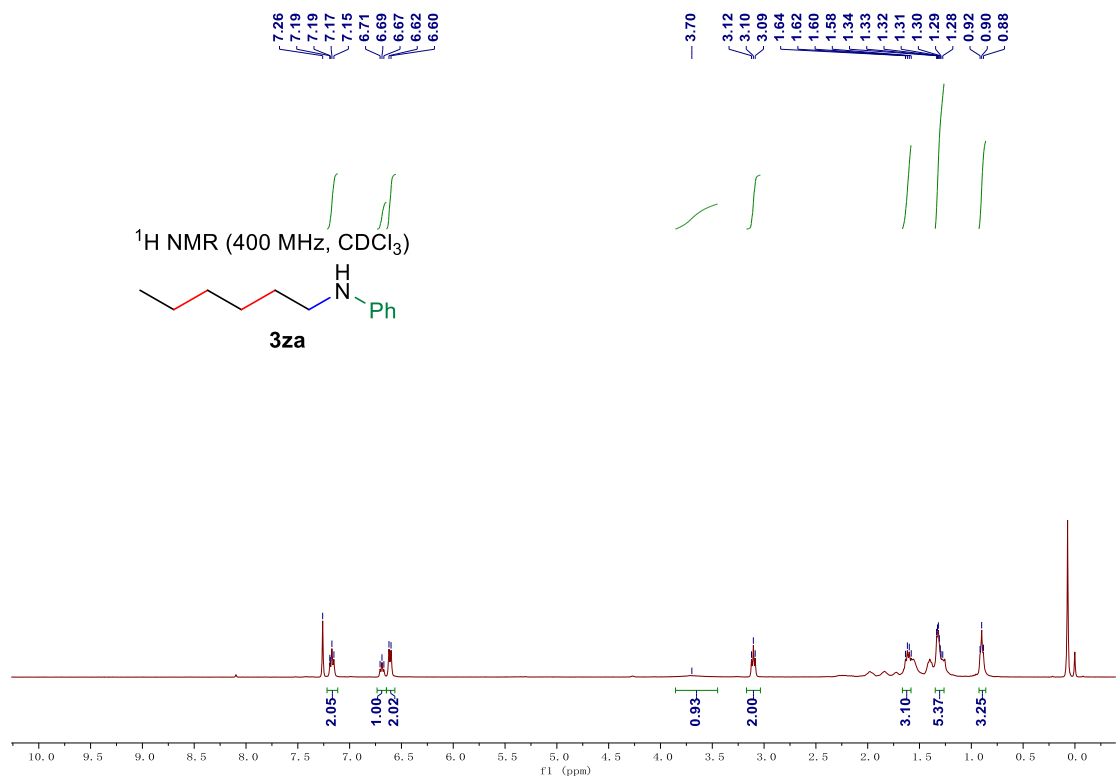

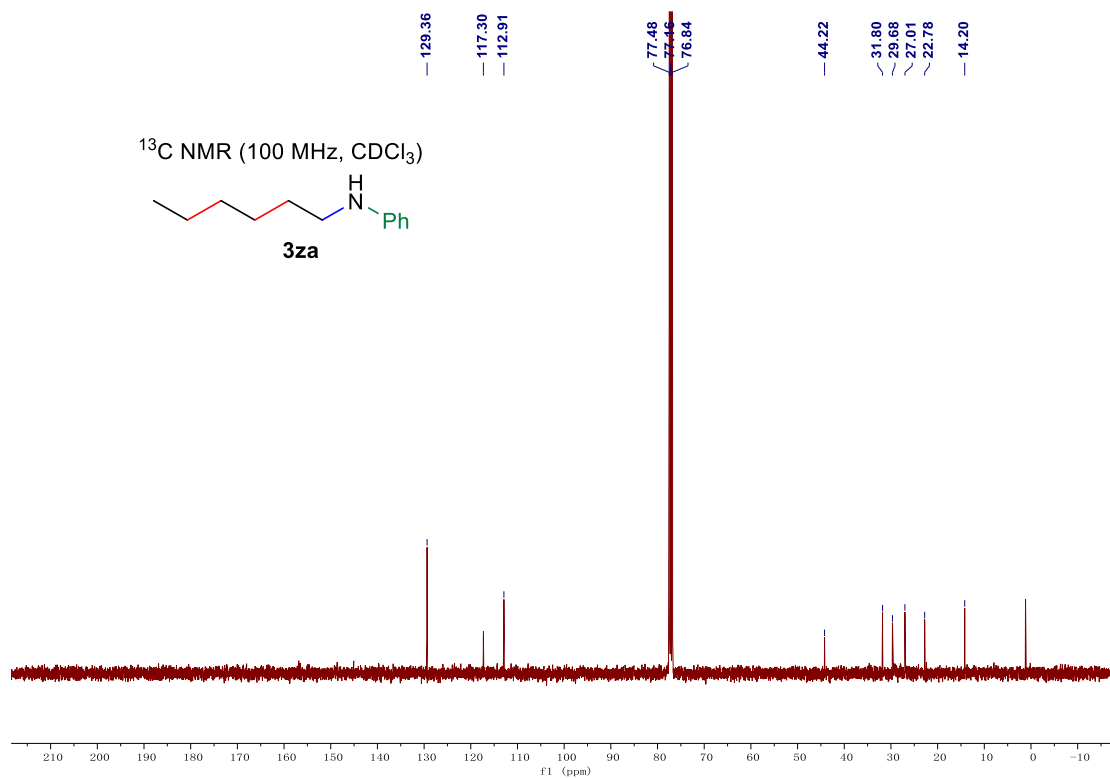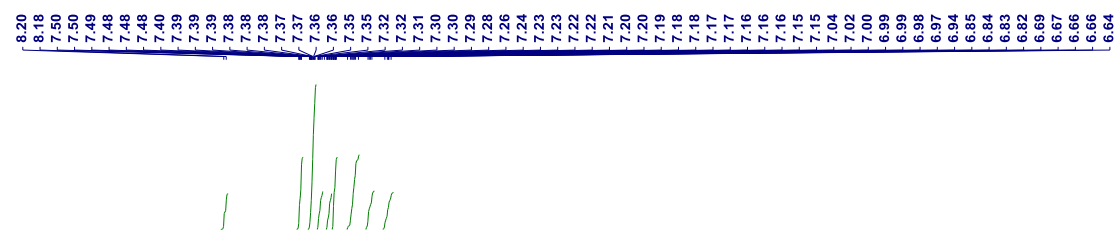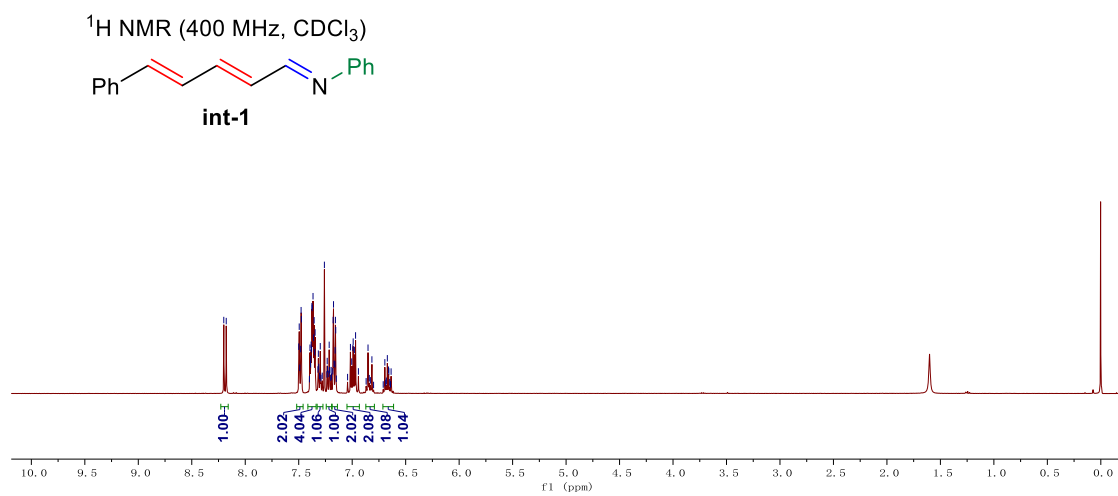

Supplement: d4cc04071f1.pdf [file d4cc04071f1.pdf]
